# Supplementary material for: Comparative DFT study of metal-free Lewis acid-catalyzed C–H and N–H silylation of (hetero)arenes: mechanistic studies and expansion of catalyst and substrate scope
Source: PubMed Central journal article supplement (PMC9075773; doi:10.1039/c9ra07985h), 2019-11-19
Supplement: RA-009-C9RA07985H-s001.pdf [file RA-009-C9RA07985H-s001.pdf]

## Supporting Information

# Comparative DFT Study of Metal-free Lewis acid-catalyzed C-H and N-H Silylation of (hetero)arenes: Mechanistic Studies and Expansion of Catalyst and Substrate Scope

*Pan Du<sup>a</sup>, Jiyang Zhao<sup>b\*</sup>*

<sup>a</sup>School of Life Science and Chemistry, Jiangsu Second Normal University, Nanjing 210013, People's Republic of China.

<sup>b</sup>Nanjing Key Laboratory of Advanced Functional Materials, School of Environmental Science, Nanjing Xiaozhuang University, Nanjing 211171, People's Republic of China.

[jyzhao1981@163.com](mailto:jyzhao1981@163.com)

## Table of Contents

|                                                                                                                                                                            |     |
|----------------------------------------------------------------------------------------------------------------------------------------------------------------------------|-----|
| <b>Figure S1.</b> Optimized intermediates and transition states for $B(C_6F_5)_3$ -catalyzed C-H silylation of N-methylindole with $PhSiH_3$ .....                         | s4  |
| <b>Figure S2.</b> Optimized intermediates and transition states for $B(C_6F_5)_3$ -catalyzed C-H silylation of N-methylindole with $PhSiH_3$ (the other two pathways)..... | s5  |
| <b>Figure S3.</b> Optimized intermediates and transition states for $B(C_6F_5)_3$ -catalyzed transformation of indoline to indole.....                                     | s6  |
| <b>Figure S4.</b> Free-energy profiles for the generation of bis(indol-3-yl)-substituted product catalyzed by $B(C_6F_5)_3$ (pathways A, B and C).....                     | s8  |
| <b>Figure S5.</b> Optimized intermediates and transition states for the generation of bis(indol-3-yl)-substituted product catalyzed by $B(C_6F_5)_3$ .....                 | s9  |
| <b>Figure S6.</b> Free-energy profiles for $B(C_6F_5)_3$ -catalyzed dehydrosilylation of N,N-dimethylaniline with $PhSiH_3$ (pathways A and C).....                        | s10 |
| <b>Figure S7.</b> Optimized intermediates and transition states for $B(C_6F_5)_3$ -catalyzed dehydrosilylation of N,N-dimethylaniline with $PhSiH_3$ .....                 | s11 |
| <b>Figure S8.</b> Optimized intermediates and transition states for N-H silylation of PhNHMe with $PhSiH_3$ catalyzed by $B(C_6F_5)_3$ .....                               | s12 |
| <b>Figure S9.</b> Free-energy profiles for C-H silylation of PhNHMe with $PhSiH_3$ catalyzed by $B(C_6F_5)_3$ .....                                                        | s13 |
| <b>Figure S10.</b> Optimized intermediates and transition states for C-H silylation of PhNHMe with $PhSiH_3$ catalyzed by $B(C_6F_5)_3$ .....                              | s14 |
| <b>Figure S11.</b> Optimized transition states for C-H silylation of indole with $PhSiH_3$                                                                                 |     |

catalyzed by another Lewis acids ( $\text{Al}(\text{C}_6\text{F}_5)_3$ ,  $\text{Ga}(\text{C}_6\text{F}_5)_3$  and  $\text{B}(2,6\text{-Cl}_2\text{C}_6\text{H}_3)(\text{p- HC}_6\text{F}_4)_2$ ).....s15

**Figure S12.** Optimized transition states for C-H silylation of our selected six substrates with  $\text{PhSiH}_3$  catalyzed by  $\text{B}(\text{C}_6\text{F}_5)_3$ . ....s16

**Figure S13.** Optimized transition states for N-H silylation of our selected six substrates with  $\text{PhSiH}_3$  catalyzed by  $\text{B}(\text{C}_6\text{F}_5)_3$ . ....s17

**Table S1.** Corrected free energies of all species.....s18

**Table S2.** Imaginary frequencies of all transition states. ....s20

**Table S3.** Cartesian coordinates of all species.....s21

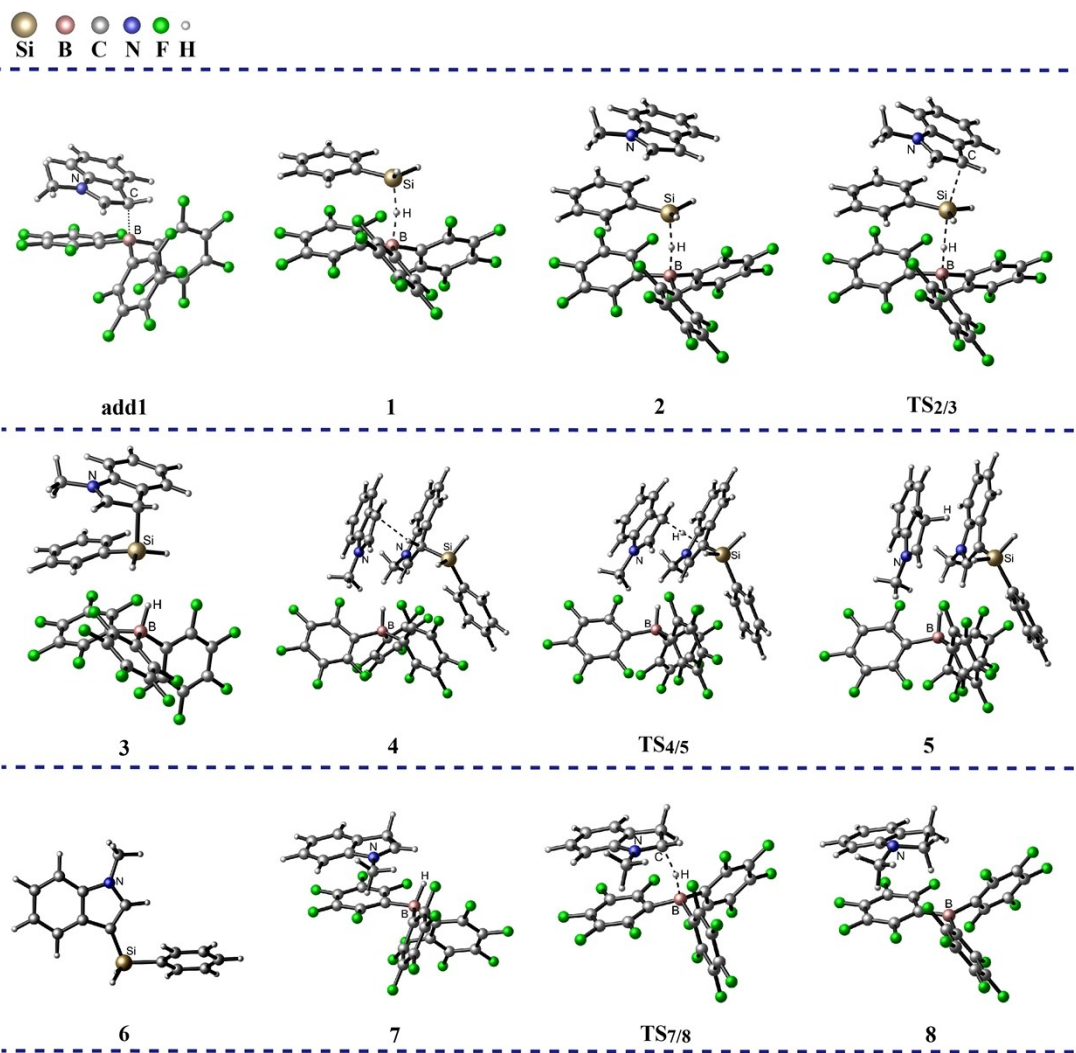

**Figure S1.** Optimized intermediates and transition states for  $B(C_6F_5)_3$ -catalyzed C-H silylation of N-methylindole with  $PhSiH_3$  (Path A).

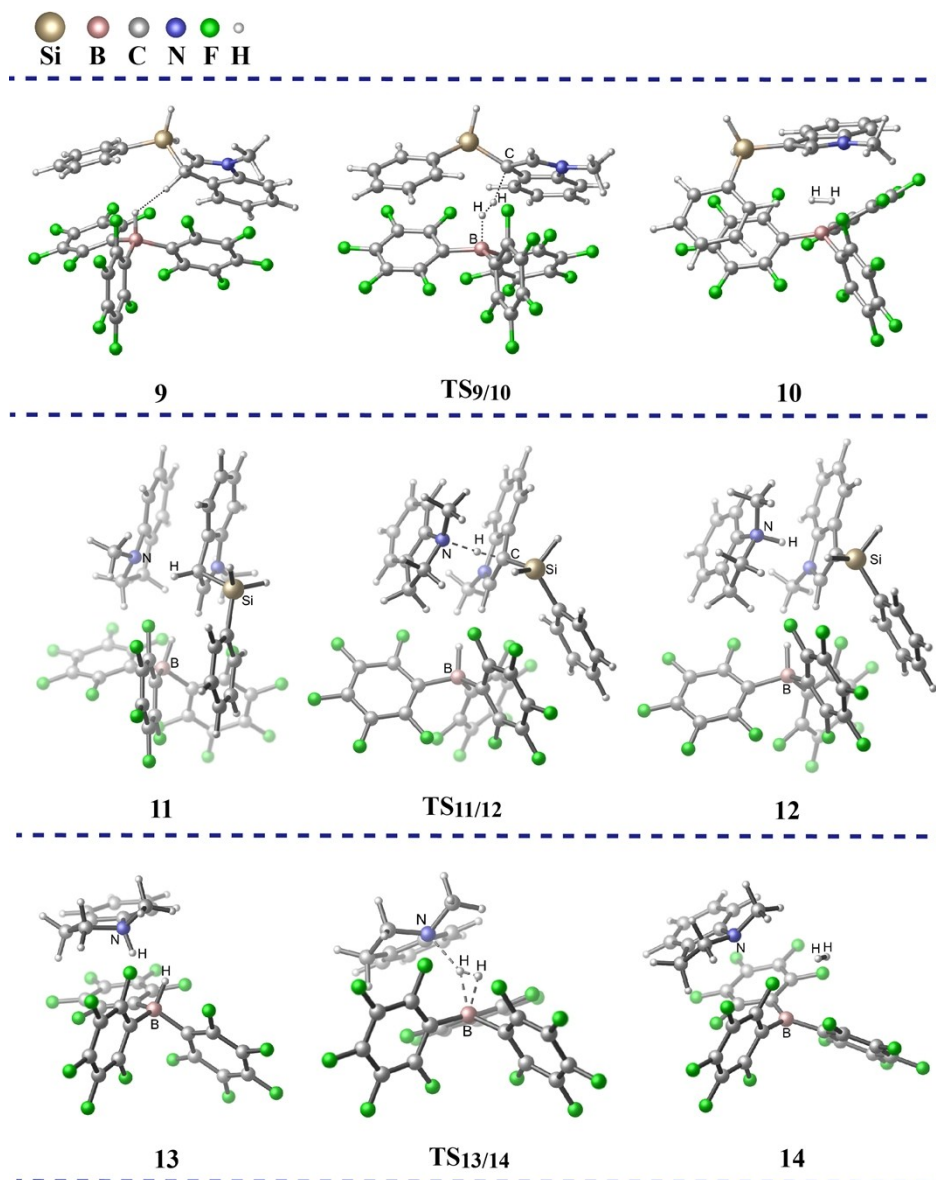

**Figure S2.** Optimized intermediates and transition states for  $B(C_6F_5)_3$ -catalyzed C-H silylation of N-methylindole with  $PhSiH_3$  (Paths B and C).

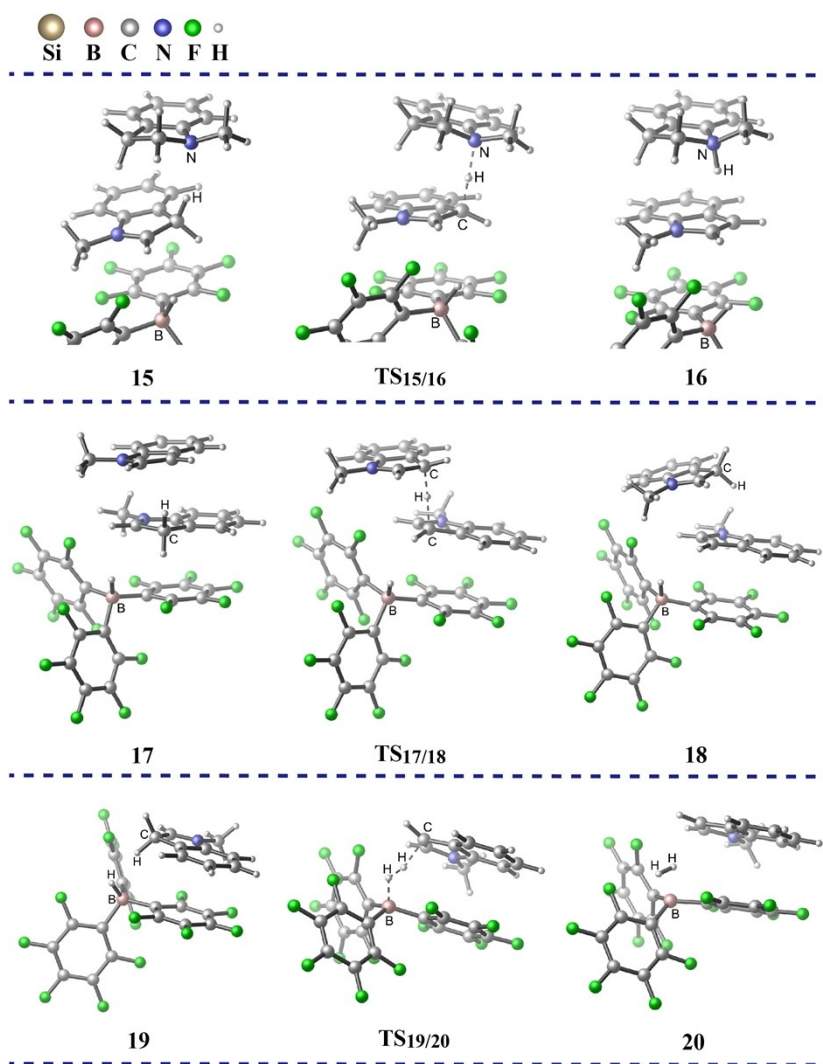

**Figure S3.** Optimized intermediates and transition states for  $B(C_6F_5)_3$ -catalyzed transformation of indoline to indole.

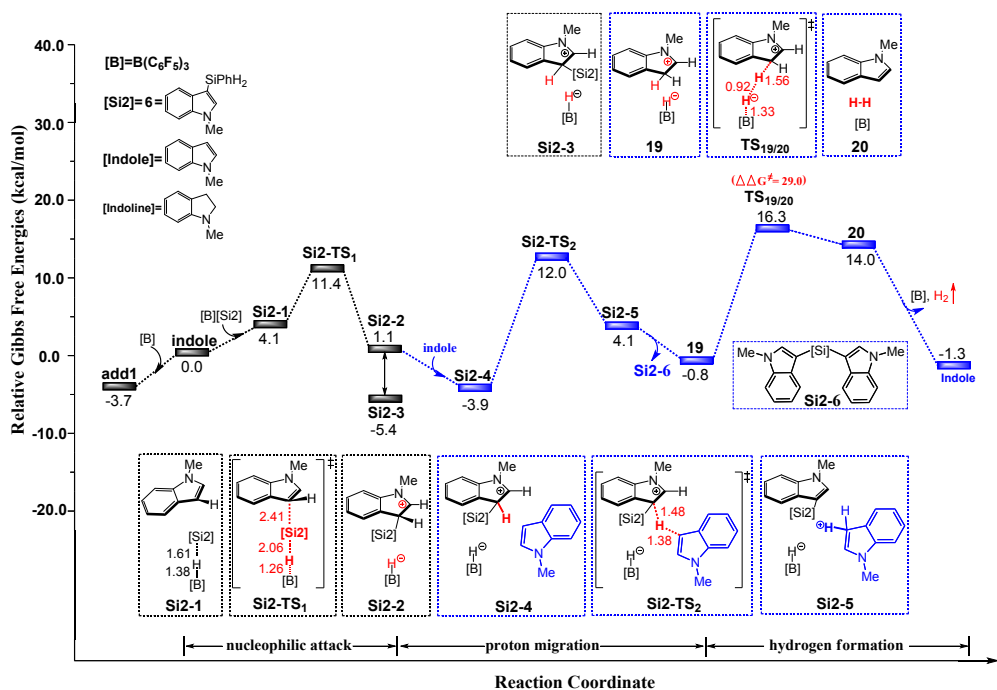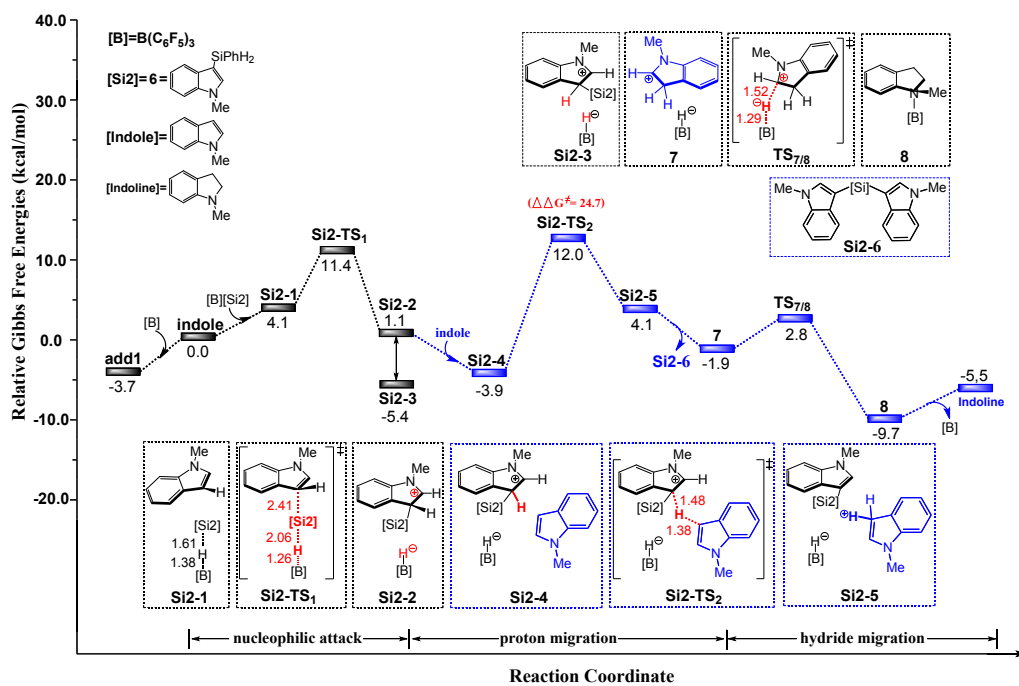

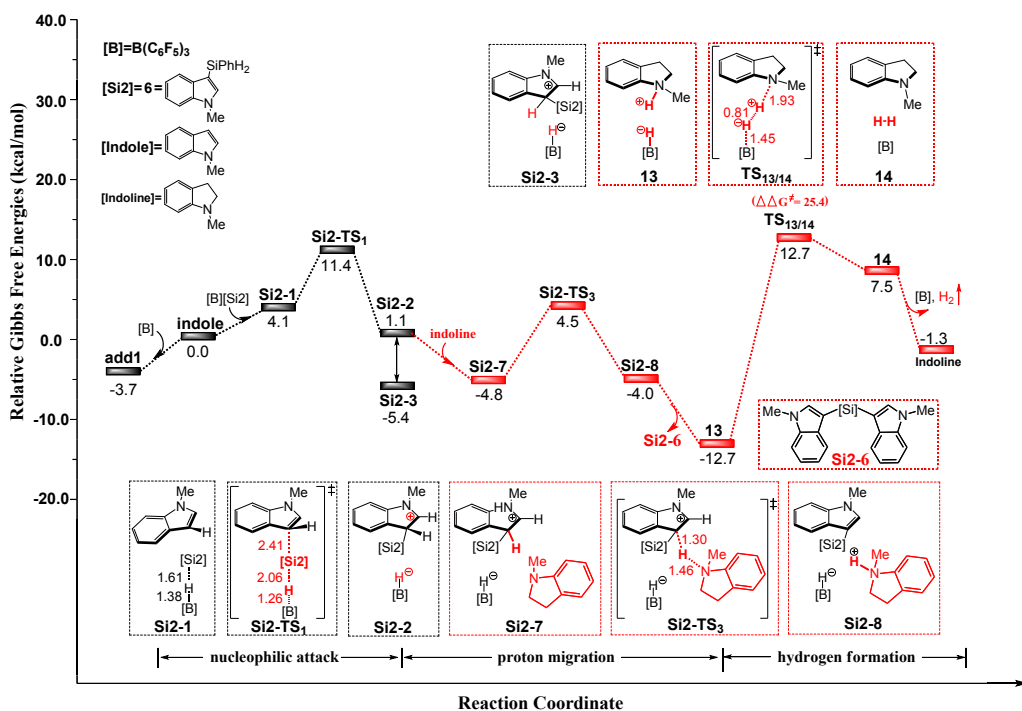

(C)

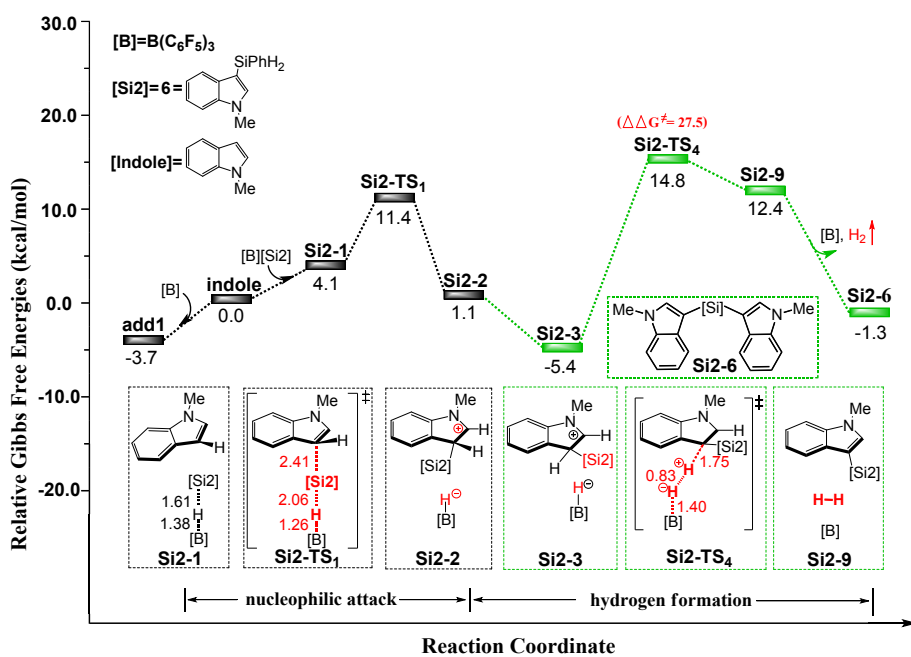

(D)

**Figure S4.** Free-energy profiles for the generation of bis(indol-3-yl)-substituted product catalyzed by  $B(C_6F_5)_3$  (pathways A, B, C and D), along with the optimized structures of the stationary points. Key bond lengths are given in Å



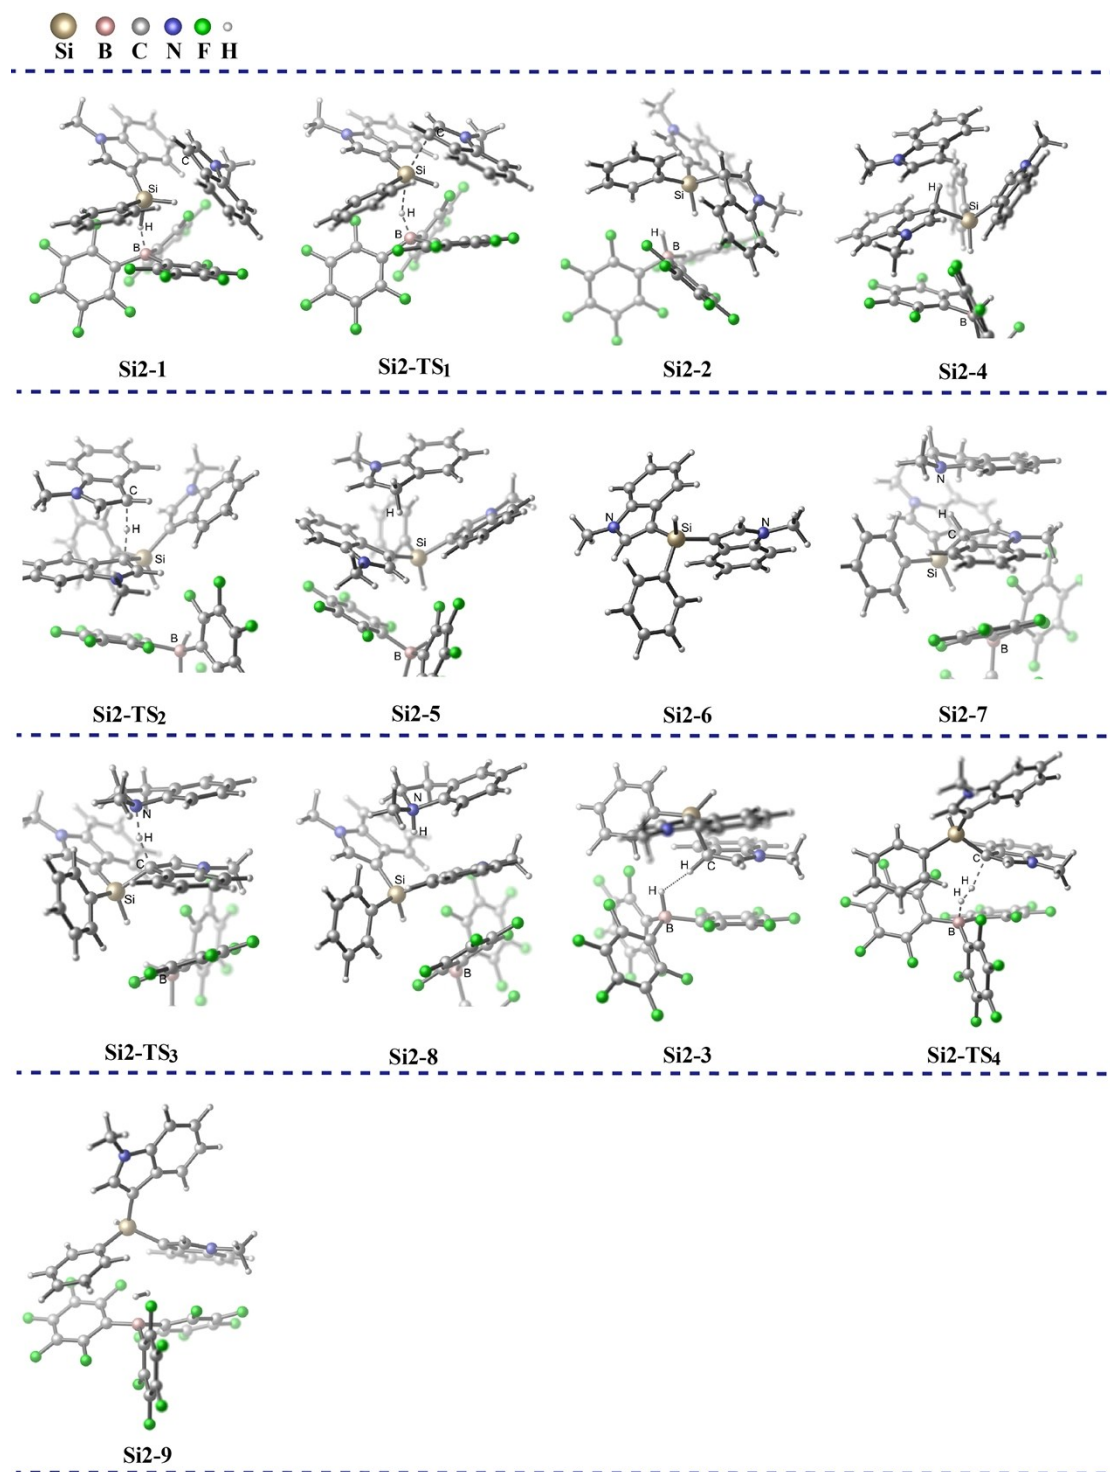

**Figure S5.** Optimized intermediates and transition states for the generation of bis(indol-3-yl)-substituted product catalyzed by  $B(C_6F_5)_3$ .

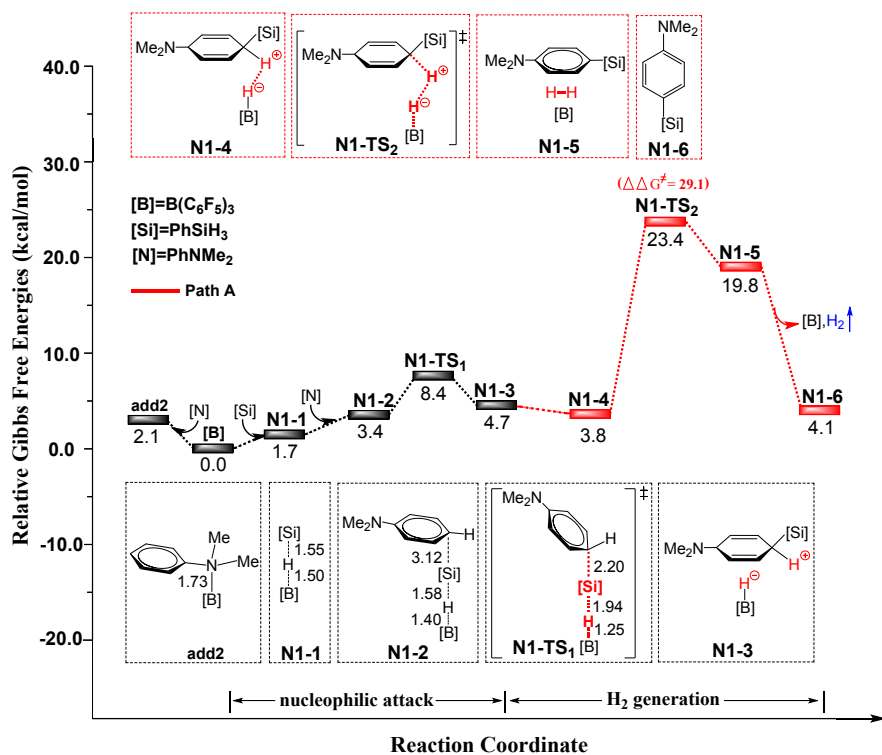

(A)

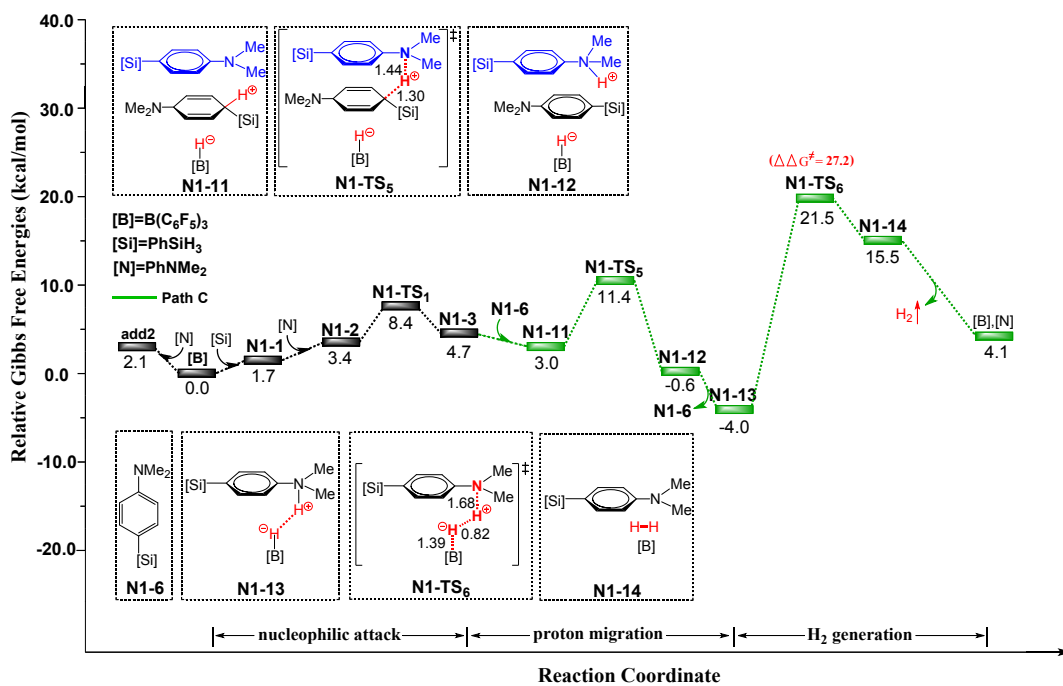

(C)

**Figure S6.** Free-energy profiles for B(C<sub>6</sub>F<sub>5</sub>)<sub>3</sub>-catalyzed dehydrosilylation of N,N-dimethylaniline with PhSiH<sub>3</sub> (pathways A and C), along with the optimized structures of the stationary points. Key bond lengths are given in Å.

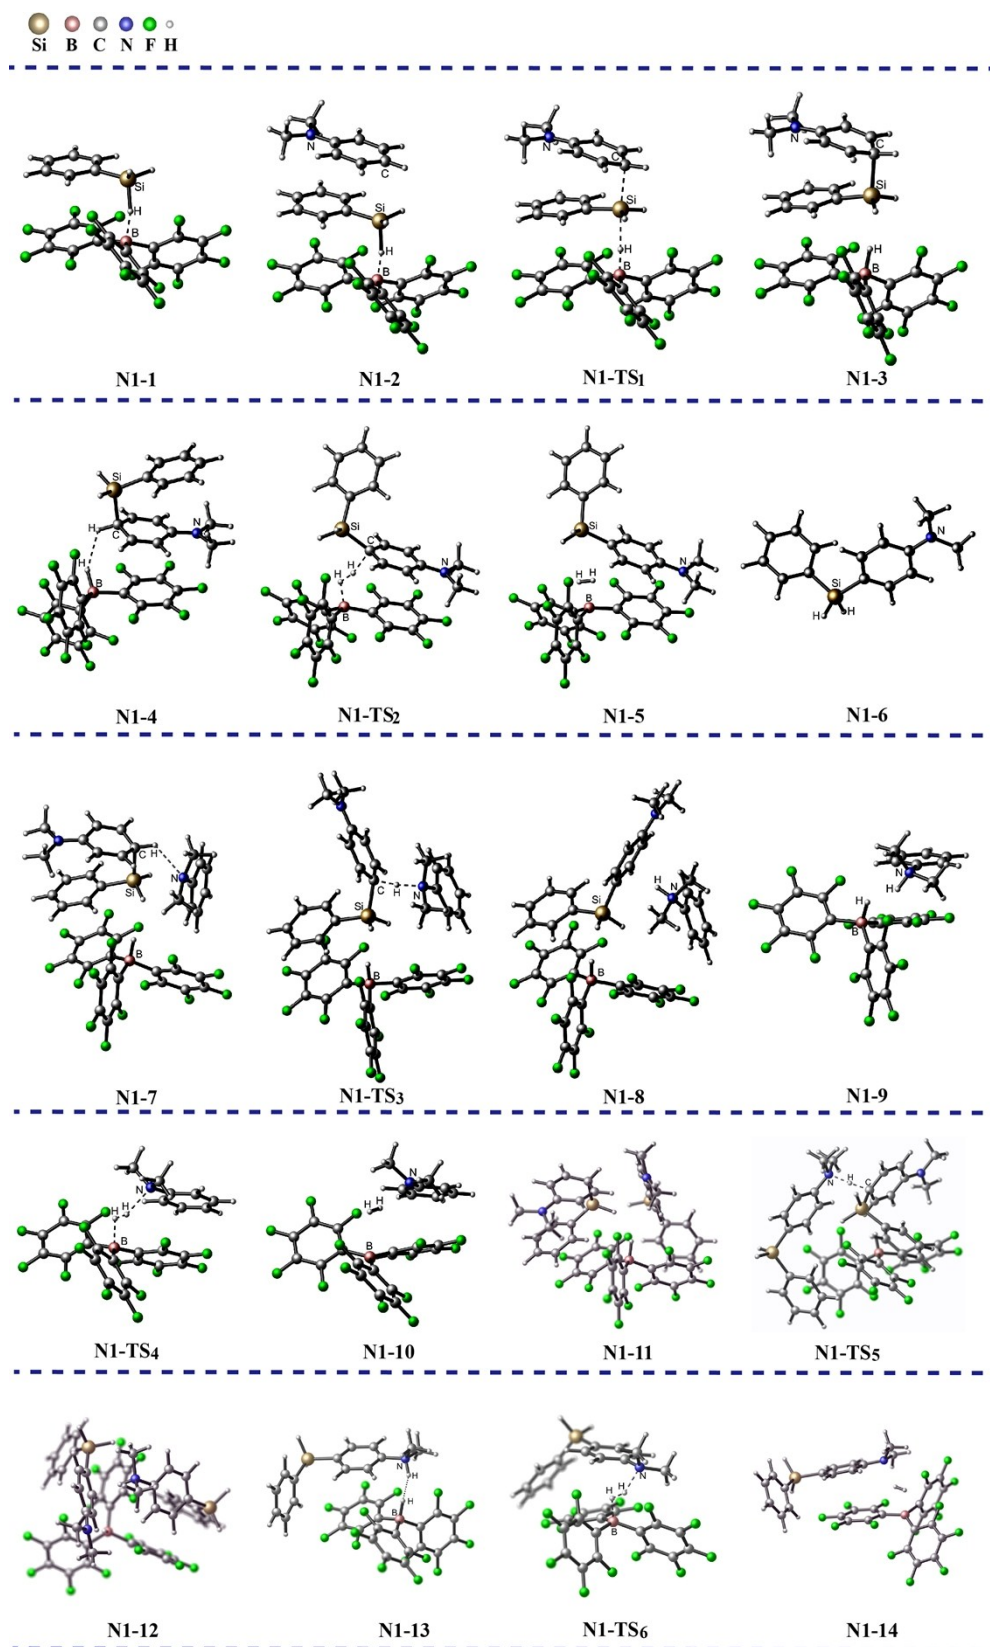

**Figure S7.** Optimized intermediates and transition states for  $B(C_6F_5)_3$ -catalyzed dehydrosilylation of *N,N*-dimethylaniline with  $PhSiH_3$ .

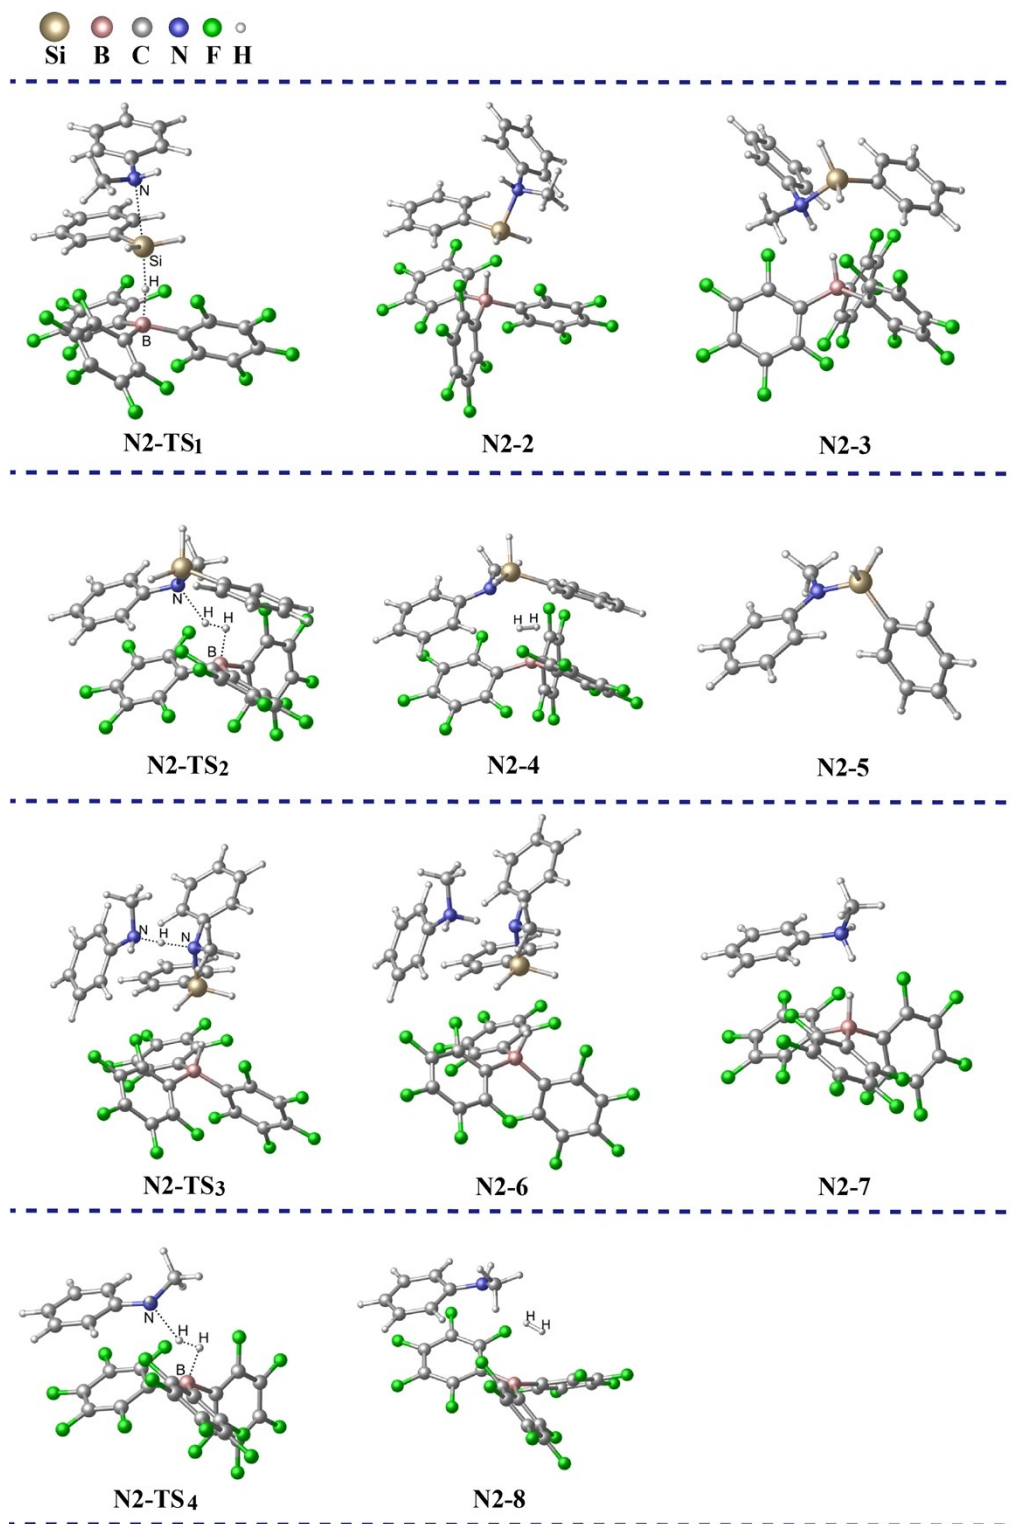

**Figure S8.** Optimized intermediates and transition states for N-H silylation of PhNHMe with PhSiH<sub>3</sub> catalyzed by B(C<sub>6</sub>F<sub>5</sub>)<sub>3</sub>.

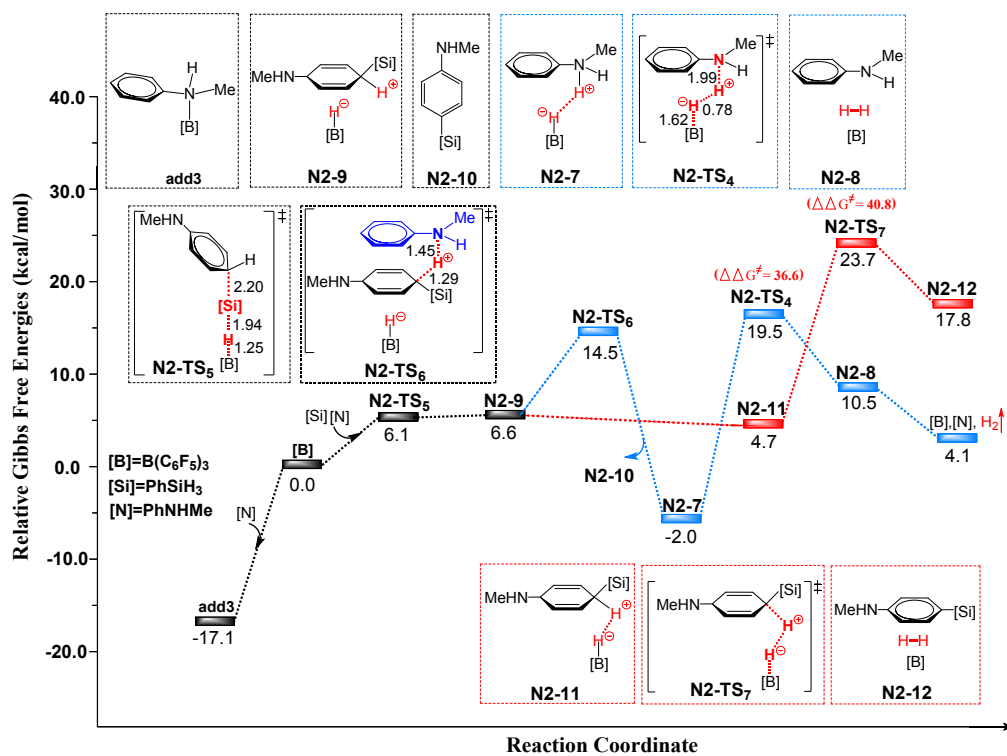

**Figure S9.** Free-energy profiles for C-H silylation of PhNHMe with PhSiH<sub>3</sub> catalyzed by B(C<sub>6</sub>F<sub>5</sub>)<sub>3</sub>, along with the optimized structures of the stationary points. Key bond lengths are given in Å.

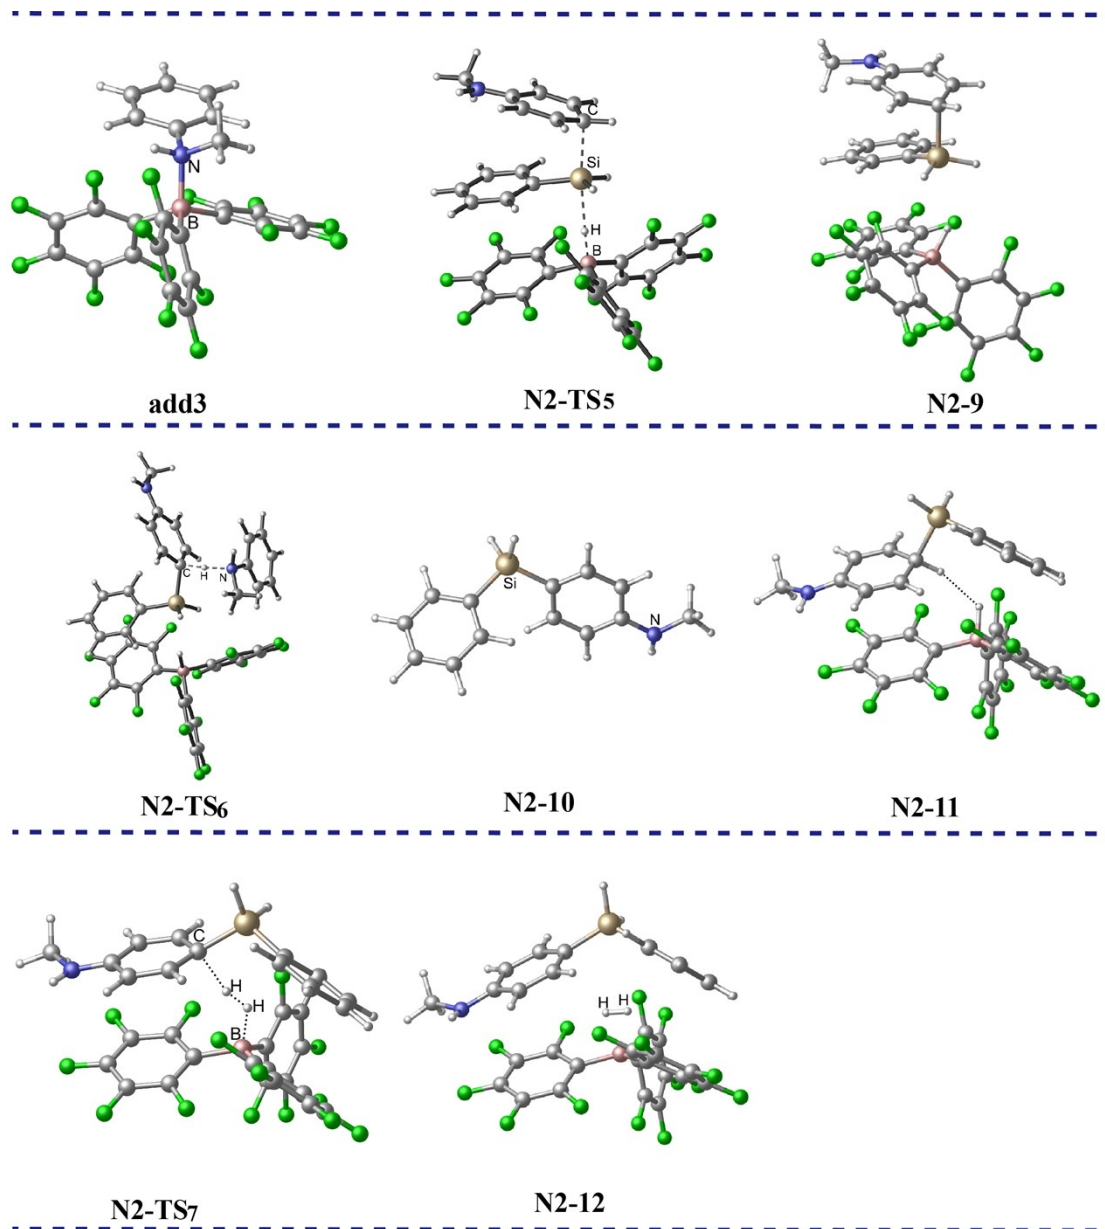

**Figure S10.** Optimized intermediates and transition states for C-H silylation of PhNHMe with PhSiH<sub>3</sub> catalyzed by B(C<sub>6</sub>F<sub>5</sub>)<sub>3</sub>.

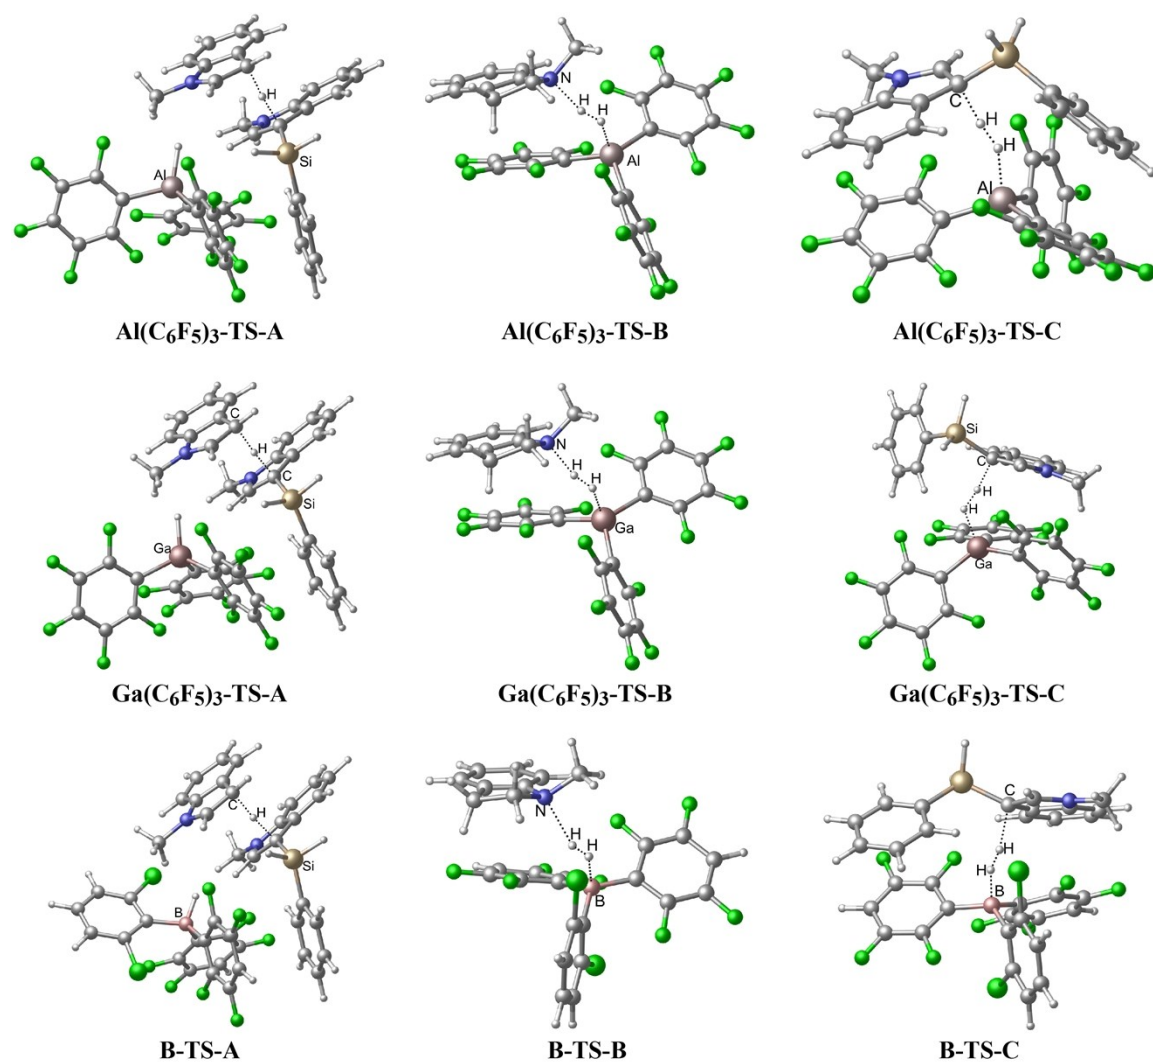

**Fig S11.** Optimized transition states for C-H silylation of indole with PhSiH<sub>3</sub> catalyzed by another Lewis acids (Al(C<sub>6</sub>F<sub>5</sub>)<sub>3</sub>, Ga(C<sub>6</sub>F<sub>5</sub>)<sub>3</sub> and B(2,6-Cl<sub>2</sub>C<sub>6</sub>H<sub>3</sub>)(p-HC<sub>6</sub>F<sub>4</sub>)<sub>2</sub>).

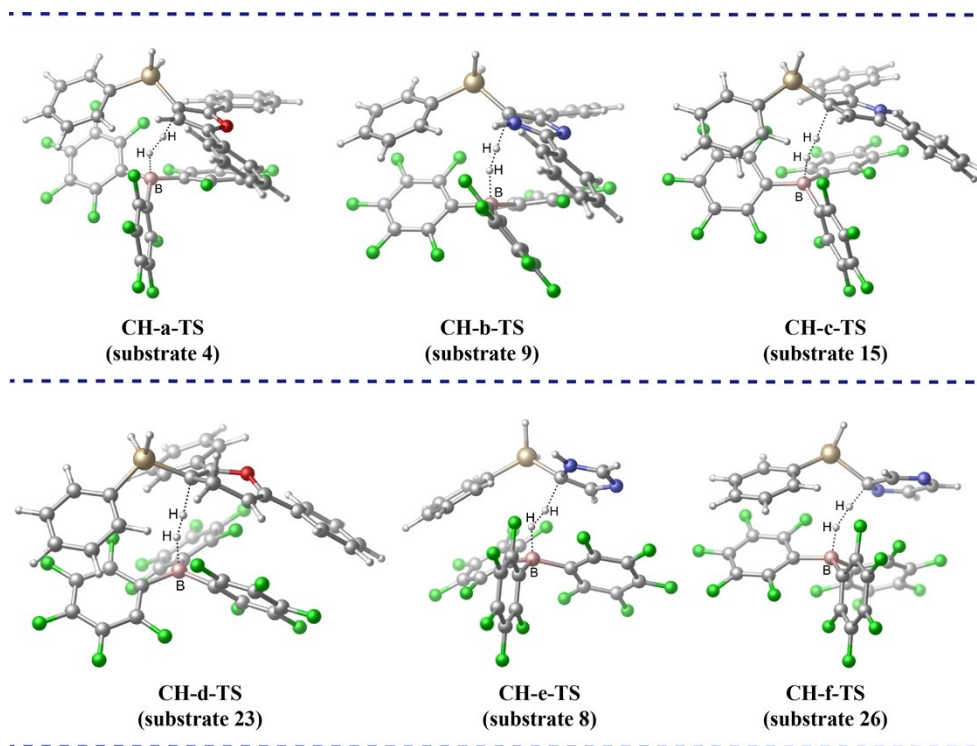

**Fig S12.** Optimized transition states for C-H silylation of our selected six substrates with PhSiH<sub>3</sub> catalyzed by B(C<sub>6</sub>F<sub>5</sub>)<sub>3</sub>.



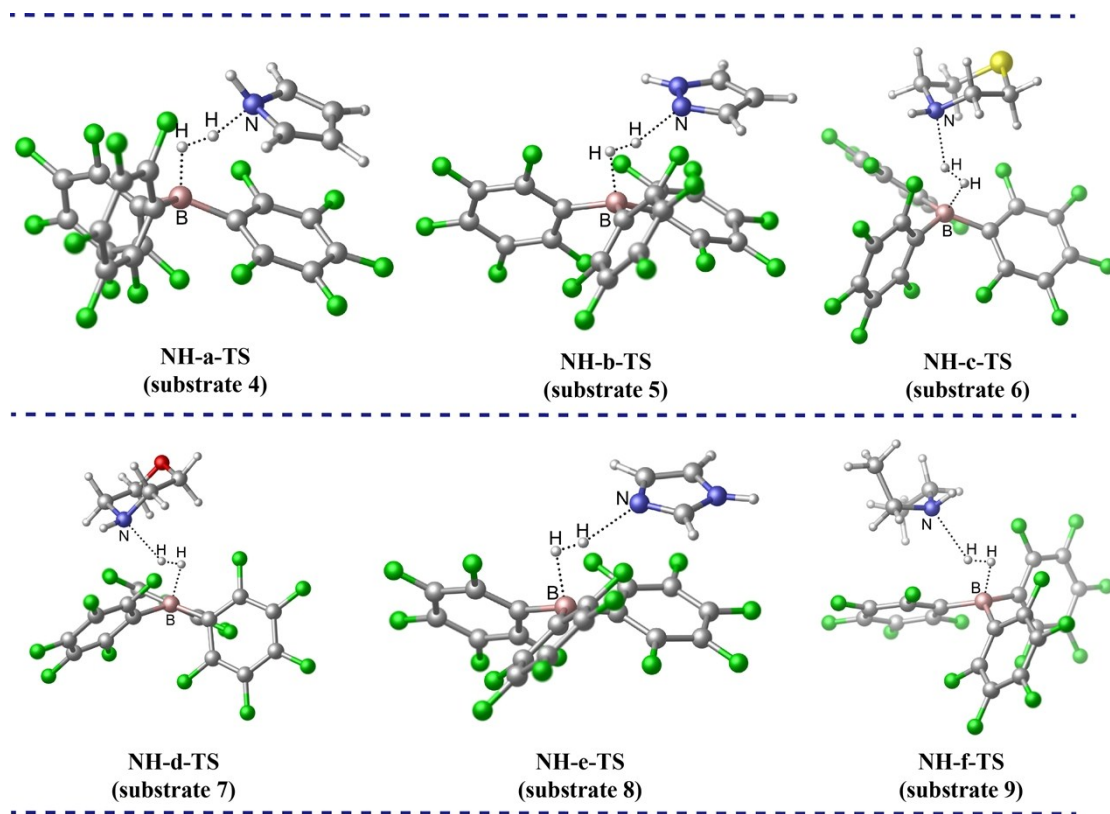

**Fig S13.** Optimized transition states for N-H silylation of our selected six substrates with  $\text{PhSiH}_3$  catalyzed by  $\text{B}(\text{C}_6\text{F}_5)_3$ .

**Table S1.** Corrected free energies of all species.

| Species                                          | Corrected free energies | Species                                           | Corrected free energies |
|--------------------------------------------------|-------------------------|---------------------------------------------------|-------------------------|
| <b>PhSiH<sub>3</sub></b>                         | -522.7889858            | <b>N1-10</b>                                      | -2575.275173            |
| <b>H<sub>2</sub></b>                             | -1.1698301              | <b>N1-11</b>                                      | -3984.516824            |
| <b>B(C<sub>6</sub>F<sub>5</sub>)<sub>3</sub></b> | -2208.12311             | <b>N1-TS5</b>                                     | -3984.503276            |
| <b>indole</b>                                    | -402.9351316            | <b>N1-12</b>                                      | -3984.522359            |
| <b>indoline</b>                                  | -404.1075367            | <b>N1-13</b>                                      | -3096.914692            |
| <b>add1</b>                                      | -2611.060044            | <b>N1-TS6</b>                                     | -3096.874225            |
| <b>1</b>                                         | -2730.905276            | <b>N1-14</b>                                      | -3096.883728            |
| <b>2</b>                                         | -3133.835916            | <b>PhNHMe</b>                                     | -326.7375942            |
| <b>TS<sub>2/3</sub></b>                          | -3133.834329            | <b>add3</b>                                       | -2534.883766            |
| <b>3</b>                                         | -3133.838789            | <b>N2-TS1</b>                                     | -3057.640856            |
| <b>4</b>                                         | -3536.763785            | <b>N2-2</b>                                       | -3057.656747            |
| <b>TS<sub>4/5</sub></b>                          | -3536.74667             | <b>N2-3</b>                                       | -3057.656913            |
| <b>5</b>                                         | -3536.765185            | <b>N2-TS2</b>                                     | -3057.624056            |
| <b>6</b>                                         | -924.5524073            | <b>N2-4</b>                                       | -3057.626797            |
| <b>7</b>                                         | -2612.220763            | <b>N2-5</b>                                       | -848.3653487            |
| <b>TS<sub>7/8</sub></b>                          | -2612.213287            | <b>N2-TS3</b>                                     | -3384.38507             |
| <b>8</b>                                         | -2612.233119            | <b>N2-6</b>                                       | -3384.384761            |
| <b>9</b>                                         | -3133.841237            | <b>N2-7</b>                                       | -2536.031988            |
| <b>TS<sub>9/10</sub></b>                         | -3133.810765            | <b>N2-TS4</b>                                     | -2535.997767            |
| <b>10</b>                                        | -3133.814322            | <b>N2-8</b>                                       | -2536.012093            |
| <b>11</b>                                        | -3537.947183            | <b>N2-TS5</b>                                     | -3057.6317521           |
| <b>TS<sub>11/12</sub></b>                        | -3537.936712            | <b>N2-9</b>                                       | -3057.630872            |
| <b>12</b>                                        | -3537.95552             | <b>N2-TS6</b>                                     | -3384.3517333           |
| <b>13</b>                                        | -2613.410373            | <b>N2-10</b>                                      | -848.3502394            |
| <b>TS<sub>13/14</sub></b>                        | -2613.367576            | <b>N2-11</b>                                      | -3057.63384             |
| <b>14</b>                                        | -2613.378167            | <b>N2-TS7</b>                                     | -3057.603609            |
| <b>indoline</b>                                  | -404.1075367            | <b>N2-12</b>                                      | -3057.612967            |
| <b>19</b>                                        | -2612.218882            | <b>PhNH<sub>2</sub></b>                           | -287.4712056            |
| <b>TS<sub>19/20</sub></b>                        | -2612.19177             | <b>PhNH<sub>2</sub>-add</b>                       | -2495.6210262           |
| <b>20</b>                                        | -2612.19544             | <b>PhNH<sub>2</sub>-product</b>                   | -1079.3503348           |
| <b>15</b>                                        | -3016.323253            | <b>PhNH<sub>2</sub>-TS</b>                        | -2496.7356253           |
| <b>TS<sub>15/16</sub></b>                        | -3016.31862             | <b>Ph<sub>2</sub>NH</b>                           | -518.4045306            |
| <b>16</b>                                        | -3016.333269            | <b>Ph<sub>2</sub>NH-add</b>                       | -2726.5339755           |
| <b>17</b>                                        | -3015.153343            | <b>Ph<sub>2</sub>NH-product</b>                   | -1310.2787120           |
| <b>TS<sub>17/18</sub></b>                        | -3015.125113            | <b>Ph<sub>2</sub>NH-TS</b>                        | -2727.6626575           |
| <b>18</b>                                        | -3015.144716            | <b>Al(C<sub>6</sub>F<sub>5</sub>)<sub>3</sub></b> | -2425.7216584           |

|                          |              |                                                                                                               |               |
|--------------------------|--------------|---------------------------------------------------------------------------------------------------------------|---------------|
| <b>Si2-1</b>             | -3535.595848 | <b>Al(C<sub>6</sub>F<sub>5</sub>)<sub>3</sub>-TS-A</b>                                                        | -3754.3406094 |
| <b>Si2-TS1</b>           | -3535.584215 | <b>Al(C<sub>6</sub>F<sub>5</sub>)<sub>3</sub>-TS-B</b>                                                        | -2830.9829864 |
| <b>Si2-2</b>             | -3535.600679 | <b>Al(C<sub>6</sub>F<sub>5</sub>)<sub>3</sub>-TS-C</b>                                                        | -3351.4194753 |
| <b>Si2-4</b>             | -3938.539554 | <b>Ga(C<sub>6</sub>F<sub>5</sub>)<sub>3</sub></b>                                                             | -4108.1124811 |
| <b>Si2-TS2</b>           | -3938.514313 | <b>Ga(C<sub>6</sub>F<sub>5</sub>)<sub>3</sub>-TS-A</b>                                                        | -5436.7240244 |
| <b>Si2-5</b>             | -3938.526838 | <b>Ga(C<sub>6</sub>F<sub>5</sub>)<sub>3</sub>-TS-B</b>                                                        | -4513.3700046 |
| <b>Si2-6</b>             | -1326.31982  | <b>Ga(C<sub>6</sub>F<sub>5</sub>)<sub>3</sub>-TS-C</b>                                                        | -5033.7930826 |
| <b>Si2-7</b>             | -3939.713338 | <b>B(2,6-Cl<sub>2</sub>C<sub>6</sub>H<sub>3</sub>)(p-<b>HC<sub>6</sub>F<sub>4</sub>)<sub>2</sub></b></b>      | -2432.6581927 |
| <b>Si2-TS3</b>           | -3939.698527 | <b>B(2,6-Cl<sub>2</sub>C<sub>6</sub>H<sub>3</sub>)(p-<b>HC<sub>6</sub>F<sub>4</sub>)<sub>2</sub>-TS-A</b></b> | -3761.2696328 |
| <b>Si2-8</b>             | -3939.712084 | <b>B(2,6-Cl<sub>2</sub>C<sub>6</sub>H<sub>3</sub>)(p-<b>HC<sub>6</sub>F<sub>4</sub>)<sub>2</sub>-TS-B</b></b> | -2837.8970053 |
| <b>Si2-TS4</b>           | -3535.578712 | <b>B(2,6-Cl<sub>2</sub>C<sub>6</sub>H<sub>3</sub>)(p-<b>HC<sub>6</sub>F<sub>4</sub>)<sub>2</sub>-TS-C</b></b> | -3358.3363006 |
| <b>Si2-9</b>             | -3535.582665 | <b>PhSiH<sub>3</sub>(Benzene)</b>                                                                             | -522.7880131  |
| <b>PhNMe<sub>2</sub></b> | -366.0045911 | <b>H<sub>2</sub>(Benzene)</b>                                                                                 | -1.1696712    |
| <b>add2</b>              | -2574.120225 | <b>B(C<sub>6</sub>F<sub>5</sub>)<sub>3</sub>(Benzene)</b>                                                     | -2208.1194587 |
| <b>N1-1</b>              | -2730.905276 | <b>CH-a-TS</b>                                                                                                | -3422.642152  |
| <b>N1-2</b>              | -3096.903056 | <b>CH-b-TS</b>                                                                                                | -3418.844673  |
| <b>N1-TS1</b>            | -3096.89496  | <b>CH-c-TS</b>                                                                                                | -3402.780036  |
| <b>N1-3</b>              | -3096.900926 | <b>CH-d-TS</b>                                                                                                | -3461.897041  |
| <b>N1-4</b>              | -3096.902313 | <b>CH-e-TS</b>                                                                                                | -2956.943111  |
| <b>N1-TS2</b>            | -3096.871137 | <b>CH-f-TS</b>                                                                                                | -2994.989222  |
| <b>N1-5</b>              | -3096.881383 | <b>NH-a-TS</b>                                                                                                | -2419.264671  |
| <b>N1-6</b>              | -887.6171461 | <b>NH-b-TS</b>                                                                                                | -2435.326257  |
| <b>N1-7</b>              | -3462.901495 | <b>NH-c-TS</b>                                                                                                | -2819.825516  |
| <b>N1-TS3</b>            | -3462.886634 | <b>NH-d-TS</b>                                                                                                | -2496.834854  |
| <b>N1-8</b>              | -3462.905674 | <b>NH-e-TS</b>                                                                                                | -2435.34723   |
| <b>N1-9</b>              | -2575.304944 | <b>NH-f-TS</b>                                                                                                | -2422.81897   |
| <b>N1-TS4</b>            | -2575.267452 |                                                                                                               |               |



**Table S2.** Imaginary frequencies of all transition states.

| Species                   | Imaginary frequency       | Species                                                                                                | Imaginary frequency       |
|---------------------------|---------------------------|--------------------------------------------------------------------------------------------------------|---------------------------|
| <b>TS<sub>2/3</sub></b>   | -38.55 cm <sup>-1</sup>   | <b>N2-TS7</b>                                                                                          | -856.74 cm <sup>-1</sup>  |
| <b>TS<sub>4/5</sub></b>   | -1245.55 cm <sup>-1</sup> | <b>PhNH<sub>2</sub>-TS</b>                                                                             | -73.12 cm <sup>-1</sup>   |
| <b>TS<sub>7/8</sub></b>   | -272.36 cm <sup>-1</sup>  | <b>Ph<sub>2</sub>NH-TS</b>                                                                             | -101.89 cm <sup>-1</sup>  |
| <b>TS<sub>9/10</sub></b>  | -602.03 cm <sup>-1</sup>  | <b>Al(C<sub>6</sub>F<sub>5</sub>)<sub>3</sub>-TS-A</b>                                                 | -1207.72 cm <sup>-1</sup> |
| <b>TS<sub>11/12</sub></b> | -735.16 cm <sup>-1</sup>  | <b>Al(C<sub>6</sub>F<sub>5</sub>)<sub>3</sub>-TS-B</b>                                                 | -309.82 cm <sup>-1</sup>  |
| <b>TS<sub>13/14</sub></b> | -503.59 cm <sup>-1</sup>  | <b>Al(C<sub>6</sub>F<sub>5</sub>)<sub>3</sub>-TS-C</b>                                                 | -877.83 cm <sup>-1</sup>  |
| <b>TS<sub>19/20</sub></b> | -1310.24 cm <sup>-1</sup> | <b>Ga(C<sub>6</sub>F<sub>5</sub>)<sub>3</sub>-TS-A</b>                                                 | -1219.48 cm <sup>-1</sup> |
| <b>TS<sub>15/16</sub></b> | -1073.32 cm <sup>-1</sup> | <b>Ga(C<sub>6</sub>F<sub>5</sub>)<sub>3</sub>-TS-B</b>                                                 | -427.31 cm <sup>-1</sup>  |
| <b>TS<sub>17/18</sub></b> | -1289.52 cm <sup>-1</sup> | <b>Ga(C<sub>6</sub>F<sub>5</sub>)<sub>3</sub>-TS-C</b>                                                 | -1161.17 cm <sup>-1</sup> |
| <b>Si2-TS1</b>            | -125.43 cm <sup>-1</sup>  | <b>B(2,6-Cl<sub>2</sub>C<sub>6</sub>H<sub>3</sub>)(p-HC<sub>6</sub>F<sub>4</sub>)<sub>2</sub>-TS-A</b> | -1204.45 cm <sup>-1</sup> |
| <b>Si2-TS2</b>            | -1187.81 cm <sup>-1</sup> | <b>B(2,6-Cl<sub>2</sub>C<sub>6</sub>H<sub>3</sub>)(p-HC<sub>6</sub>F<sub>4</sub>)<sub>2</sub>-TS-B</b> | -164.63 cm <sup>-1</sup>  |
| <b>Si2-TS3</b>            | -1215.09 cm <sup>-1</sup> | <b>B(2,6-Cl<sub>2</sub>C<sub>6</sub>H<sub>3</sub>)(p-HC<sub>6</sub>F<sub>4</sub>)<sub>2</sub>-TS-C</b> | -628.91 cm <sup>-1</sup>  |
| <b>Si2-TS4</b>            | -513.60 cm <sup>-1</sup>  | <b>CH-a-TS</b>                                                                                         | -1128.16 cm <sup>-1</sup> |
| <b>N1-TS1</b>             | -19.23 cm <sup>-1</sup>   | <b>CH-b-TS</b>                                                                                         | -975.71 cm <sup>-1</sup>  |
| <b>N1-TS2</b>             | -971.99 cm <sup>-1</sup>  | <b>CH-c-TS</b>                                                                                         | -981.82 cm <sup>-1</sup>  |
| <b>N1-TS3</b>             | -1011.61 cm <sup>-1</sup> | <b>CH-d-TS</b>                                                                                         | -1046.56 cm <sup>-1</sup> |
| <b>N1-TS4</b>             | -163.20 cm <sup>-1</sup>  | <b>CH-e-TS</b>                                                                                         | -1100.10 cm <sup>-1</sup> |
| <b>N1-TS5</b>             | -1063.84 cm <sup>-1</sup> | <b>CH-f-TS</b>                                                                                         | -626.78 cm <sup>-1</sup>  |
| <b>N1-TS6</b>             | -432.10 cm <sup>-1</sup>  | <b>NH-a-TS</b>                                                                                         | -1204.25 cm <sup>-1</sup> |
| <b>N2-TS1</b>             | -86.51 cm <sup>-1</sup>   | <b>NH-b-TS</b>                                                                                         | -138.68 cm <sup>-1</sup>  |
| <b>N2-TS2</b>             | -448.37 cm <sup>-1</sup>  | <b>NH-c-TS</b>                                                                                         | -139.12 cm <sup>-1</sup>  |
| <b>N2-TS3</b>             | -568.59 cm <sup>-1</sup>  | <b>NH-d-TS</b>                                                                                         | -101.74 cm <sup>-1</sup>  |
| <b>N2-TS4</b>             | -183.65 cm <sup>-1</sup>  | <b>NH-e-TS</b>                                                                                         | -91.14 cm <sup>-1</sup>   |
| <b>N2-TS5</b>             | -21.99 cm <sup>-1</sup>   | <b>NH-f-TS</b>                                                                                         | -77.56 cm <sup>-1</sup>   |
| <b>N2-TS6</b>             | -1126.04 cm <sup>-1</sup> |                                                                                                        |                           |

**Table S3.** Cartesian coordinates of all species.

| <b>BPhF<sub>3</sub></b> |           |           |           | <b>PhSiH<sub>3</sub></b> |             |           |           |
|-------------------------|-----------|-----------|-----------|--------------------------|-------------|-----------|-----------|
| Symbol                  | X         | Y         | Z         | Symbol                   | X           | Y         | Z         |
| F                       | 3.355688  | -3.368899 | 1.355477  | Si                       | 2.341748    | 0.000269  | 0.004357  |
| F                       | 1.287280  | 4.607038  | 1.269517  | H                        | 2.851076    | -1.054713 | -0.901535 |
| F                       | 0.869893  | -2.412727 | 1.363706  | H                        | 2.863637    | -0.266067 | 1.365320  |
| C                       | 3.074123  | -2.257854 | 0.684706  | H                        | 2.826139    | 1.326849  | -0.441134 |
| C                       | -0.642728 | 4.338159  | -0.041347 | C                        | 0.464682    | 0.000483  | -0.009381 |
| C                       | 0.443155  | 3.803624  | 0.632580  | C                        | -0.254528   | 1.201358  | -0.007520 |
| C                       | 1.791642  | -1.742289 | 0.671743  | C                        | -0.254677   | -1.201694 | -0.007530 |
| C                       | 4.073793  | -1.603516 | -0.016553 | C                        | -1.646570   | 1.203537  | 0.002404  |
| F                       | -2.565989 | 4.017984  | -1.350003 | H                        | 0.275024    | 2.148844  | -0.017443 |
| C                       | -1.528009 | 3.501908  | -0.701927 | C                        | -1.645274   | -1.204663 | 0.002634  |
| F                       | 1.693323  | 1.975361  | 1.294158  | H                        | 0.274222    | -2.150032 | -0.017706 |
| C                       | 0.633226  | 2.434569  | 0.628265  | C                        | -2.343100   | -0.000150 | 0.008124  |
| C                       | -1.317624 | 2.135972  | -0.671556 | H                        | -2.186185   | 2.143385  | 0.002427  |
| C                       | -0.234601 | 1.551331  | -0.014858 | H                        | -2.184852   | -2.144530 | 0.003005  |
| C                       | 1.452672  | -0.571167 | -0.006679 | H                        | -3.426724   | -0.000722 | 0.013689  |
| C                       | 3.783802  | -0.442281 | -0.713840 |                          |             |           |           |
| F                       | -2.199899 | 1.379162  | -1.324726 | <b>add1</b>              |             |           |           |
| C                       | 2.494322  | 0.055473  | -0.691173 | Symbol                   | X           | Y         | Z         |
| B                       | -0.004095 | 0.002471  | -0.001927 | F                        | 0.2699864   | -3.783019 | -2.048900 |
| F                       | 4.743227  | 0.180228  | -1.388909 | F                        | 0.-3.512512 | -2.895922 | -1.292838 |
| F                       | 2.272921  | 1.175140  | -1.380469 | F                        | 0.720625    | -2.048447 | -1.915976 |
| C                       | -1.228414 | -0.973451 | 0.017008  | C                        | 2.602689    | -2.989077 | -0.983567 |
| F                       | -2.539858 | 0.487036  | 1.342644  | C                        | -3.620785   | -0.602001 | -1.808897 |
| F                       | -0.116774 | -2.593093 | -1.305546 | C                        | -2.945765   | -1.687141 | -1.281247 |
| C                       | -2.413792 | -0.666348 | 0.685617  | C                        | 1.564441    | -2.075049 | -0.878968 |
| C                       | -1.199716 | -2.210025 | -0.628366 | C                        | 3.548632    | -3.075802 | 0.020887  |
| C                       | -3.496407 | -1.525011 | 0.726142  | F                        | -3.663750   | 1.702759  | -2.251661 |
| C                       | -2.269911 | -3.084597 | -0.623047 | C                        | -3.023811   | 0.644129  | -1.759006 |
| F                       | -4.600687 | -1.198470 | 1.387653  | F                        | -1.139112   | -2.600188 | -0.168257 |
| F                       | -2.203459 | -4.246957 | -1.262034 | C                        | -1.698861   | -1.499062 | -0.709687 |
| C                       | -3.422657 | -2.739451 | 0.063553  | C                        | -1.772214   | 0.785457  | -1.179847 |
| F                       | 5.304251  | -2.087137 | -0.020557 | C                        | -1.058836   | -0.268238 | -0.614935 |
| F                       | -4.451703 | -3.569097 | 0.086195  | C                        | 1.401431    | -1.225428 | 0.212064  |
| F                       | -0.834792 | 5.646185  | -0.053478 | C                        | 3.449222    | -2.233571 | 1.113028  |
|                         |           |           |           | F                        | -1.292102   | 2.036245  | -1.158356 |
|                         |           |           |           | C                        | 2.399329    | -1.333132 | 1.176027  |
| <b>H<sub>2</sub></b>    |           |           |           | B                        | 0.258943    | -0.053966 | 0.331256  |
| Symbol                  | X         | Y         | Z         | F                        | 4.362736    | -2.286858 | 2.081113  |
| H                       | 0.000000  | 0.000000  | 0.370227  | F                        | 2.393515    | -0.514322 | 2.244401  |
| H                       | 0.000000  | 0.000000  | -0.370227 |                          |             |           |           |

|   |           |           |           |
|---|-----------|-----------|-----------|
| C | 1.068476  | 1.340261  | 0.031974  |
| F | 1.208903  | 0.627027  | -2.211760 |
| F | 1.109488  | 2.293458  | 2.220366  |
| C | 1.522192  | 1.530146  | -1.271671 |
| C | 1.459506  | 2.330336  | 0.920453  |
| C | 2.276827  | 2.611823  | -1.681932 |
| C | 2.216678  | 3.435867  | 0.553494  |
| F | 2.666954  | 2.734795  | -2.949440 |
| F | 2.545908  | 4.356895  | 1.458613  |
| C | 2.629810  | 3.579269  | -0.755262 |
| F | 4.546968  | -3.948676 | -0.067353 |
| F | 3.356375  | 4.630010  | -1.123090 |
| F | -4.824234 | -0.754117 | -2.351236 |
| C | -1.666622 | 0.811354  | 1.963534  |
| C | -2.744069 | -0.079548 | 2.010667  |
| C | -4.068023 | 0.290678  | 1.834535  |
| C | -4.305329 | 1.645079  | 1.628798  |
| C | -3.252136 | 2.564777  | 1.610072  |
| C | -1.929511 | 2.163415  | 1.772079  |
| C | -0.420817 | -0.000526 | 1.978802  |
| C | -0.912993 | -1.331776 | 2.239817  |
| H | -4.875340 | -0.431288 | 1.848340  |
| H | -5.320616 | 1.991364  | 1.483029  |
| H | -1.126801 | 2.887050  | 1.729907  |
| H | 0.409344  | 0.305901  | 2.602709  |
| N | -2.219008 | -1.381110 | 2.202973  |
| C | -3.042235 | -2.584043 | 2.260883  |
| H | -3.796513 | -2.462834 | 3.036772  |
| H | -3.524608 | -2.735019 | 1.294068  |
| H | -2.404750 | -3.434081 | 2.489061  |
| H | -3.470920 | 3.613597  | 1.453009  |
| H | -0.331434 | -2.233051 | 2.382807  |

## 1

| Symbol | X         | Y         | Z         |
|--------|-----------|-----------|-----------|
| Si     | 0.630622  | 0.009676  | 2.656498  |
| H      | -0.124288 | 0.003150  | 1.307928  |
| H      | 0.195310  | -1.250562 | 3.282262  |
| F      | -4.559612 | 2.785529  | -1.095610 |
| F      | 3.312361  | 1.939829  | -2.704963 |
| F      | -3.262735 | 0.467044  | -1.170878 |
| C      | -3.328210 | 2.709617  | -0.599994 |
| C      | 3.589559  | -0.172280 | -1.717698 |
| C      | 2.805215  | 0.931075  | -2.001087 |

|   |           |           |           |
|---|-----------|-----------|-----------|
| C | -2.631785 | 1.510037  | -0.623811 |
| C | -2.733604 | 3.835254  | -0.059420 |
| F | 3.805898  | -2.287525 | -0.715335 |
| C | 3.058333  | -1.222834 | -0.988287 |
| F | 0.802009  | 2.074773  | -1.859367 |
| C | 1.498516  | 0.980304  | -1.539499 |
| C | 1.756447  | -1.131298 | -0.538641 |
| C | 0.927969  | -0.039382 | -0.785838 |
| C | -1.339348 | 1.384460  | -0.129765 |
| C | -1.445315 | 3.755441  | 0.446722  |
| F | 1.303611  | -2.142242 | 0.214997  |
| C | -0.784195 | 2.545281  | 0.393042  |
| B | -0.523667 | 0.011487  | -0.134363 |
| F | -0.865818 | 4.833256  | 0.965758  |
| F | 0.467031  | 2.507975  | 0.880560  |
| C | -1.399370 | -1.322118 | -0.095726 |
| F | -0.490431 | -2.195259 | -2.097899 |
| F | -2.446300 | -0.622769 | 1.899391  |
| C | -1.334202 | -2.310134 | -1.067662 |
| C | -2.319702 | -1.534697 | 0.922916  |
| C | -2.127693 | -3.445118 | -1.034942 |
| C | -3.121752 | -2.658610 | 0.997657  |
| F | -2.036424 | -4.366165 | -1.989898 |
| F | -3.980835 | -2.822717 | 1.999314  |
| C | -3.025061 | -3.619200 | 0.004121  |
| F | -3.388050 | 4.987729  | -0.030007 |
| F | -3.789632 | -4.702365 | 0.050459  |
| F | 4.849798  | -0.219737 | -2.126472 |
| H | 0.101851  | 1.218880  | 3.307451  |
| C | 2.441057  | -0.001339 | 2.258023  |
| C | 3.161933  | -1.192792 | 2.421044  |
| C | 3.096079  | 1.115049  | 1.717382  |
| C | 4.497011  | -1.272289 | 2.040834  |
| H | 2.675872  | -2.070371 | 2.834083  |
| C | 4.427091  | 1.029980  | 1.325957  |
| H | 2.568818  | 2.053009  | 1.592128  |
| C | 5.125631  | -0.165066 | 1.480460  |
| H | 5.038927  | -2.201761 | 2.164496  |
| H | 4.918177  | 1.894440  | 0.894533  |
| H | 6.159479  | -0.231933 | 1.162773  |

## 2

| Symbol | X        | Y        | Z         |
|--------|----------|----------|-----------|
| Si     | 0.958918 | 0.303645 | -1.359091 |

H -0.404948 0.143236 -0.565320  
 H 1.114243 1.762202 -1.276667  
 F -5.938809 -0.699015 -1.904335  
 F -0.530374 -4.253140 2.843048  
 F -4.364879 0.556092 -0.167348  
 C -4.668991 -1.076674 -1.779976  
 C 0.751653 -2.345131 3.322788  
 C -0.272778 -2.963798 2.631471  
 C -3.824765 -0.433691 -0.886286  
 C -4.186323 -2.120619 -2.547432  
 F 1.999094 -0.403164 3.764053  
 C 1.014872 -1.003690 3.100451  
 F -1.992269 -2.907743 1.088343  
 C -1.016261 -2.238106 1.711597  
 C 0.260435 -0.320679 2.167772  
 C -0.773442 -0.898530 1.435658  
 C -2.494490 -0.794264 -0.719315  
 C -2.865923 -2.518471 -2.409722  
 F 0.589734 0.959826 1.944263  
 C -2.062941 -1.855518 -1.503227  
 B -1.486929 -0.047562 0.282982  
 F -2.394259 -3.526586 -3.138523  
 F -0.794062 -2.283211 -1.381499  
 C -1.850684 1.485430 0.580447  
 F -2.131134 1.196876 2.911176  
 F -1.651200 1.979419 -1.718110  
 C -2.147440 1.992992 1.836112  
 C -1.911946 2.394902 -0.466211  
 C -2.474627 3.322553 2.048345  
 C -2.225608 3.731098 -0.297420  
 F -2.752019 3.767411 3.271582  
 F -2.260509 4.564731 -1.334118  
 C -2.512722 4.195864 0.975060  
 F -4.983470 -2.742730 -3.406968  
 F -2.822546 5.473236 1.163800  
 F 1.491521 -3.032517 4.184461  
 H 0.499456 -0.256386 -2.636192  
 C 2.137433 -0.662560 -0.307256  
 C 3.046932 0.025458 0.506061  
 C 2.069292 -2.061582 -0.215620  
 C 3.860406 -0.667008 1.398592  
 H 3.121990 1.107857 0.450248  
 C 2.870744 -2.748980 0.687588  
 H 1.376824 -2.617087 -0.836843

C 3.761848 -2.050377 1.501176  
 H 4.556910 -0.120483 2.022919  
 H 2.795770 -3.827645 0.763722  
 H 4.375989 -2.586435 2.215407  
 C 4.928942 0.796478 -1.811013  
 C 5.872353 1.132236 -0.835049  
 C 3.991180 1.728840 -2.311640  
 C 5.852899 2.428536 -0.355529  
 H 6.574422 0.399835 -0.453595  
 C 3.998955 3.039398 -1.808228  
 C 4.922540 3.373730 -0.835911  
 H 6.563178 2.725787 0.406621  
 H 3.286458 3.771251 -2.172149  
 H 4.938289 4.379561 -0.433956  
 C 3.165377 1.017614 -3.246319  
 C 3.626510 -0.277267 -3.265181  
 H 2.384906 1.422789 -3.871792  
 N 4.685409 -0.415923 -2.412592  
 C 5.335645 -1.660158 -2.047554  
 H 6.417052 -1.564405 -2.157245  
 H 5.093613 -1.920673 -1.013994  
 H 4.981531 -2.448651 -2.708872  
 H 3.278419 -1.126040 -3.835576

### 3

| Symbol | X         | Y         | Z         |
|--------|-----------|-----------|-----------|
| Si     | -1.905213 | 0.526016  | -1.603336 |
| H      | 0.459774  | -0.054242 | -0.993395 |
| H      | -1.492395 | -0.659935 | -2.368092 |
| F      | 5.108793  | 2.972948  | -2.071657 |
| F      | 0.793131  | 1.236704  | 4.630950  |
| F      | 4.161294  | 0.577884  | -1.523704 |
| C      | 3.912855  | 2.867870  | -1.487690 |
| C      | -0.303705 | -0.666702 | 3.796987  |
| C      | 0.537952  | 0.412337  | 3.609994  |
| C      | 3.386317  | 1.619421  | -1.180203 |
| C      | 3.192482  | 4.008750  | -1.194949 |
| F      | -1.364040 | -2.569966 | 2.913124  |
| C      | -0.558973 | -1.518491 | 2.736476  |
| F      | 1.942551  | 1.678572  | 2.277250  |
| C      | 1.111175  | 0.627120  | 2.363377  |
| C      | 0.009945  | -1.248486 | 1.505747  |
| C      | 0.854198  | -0.170537 | 1.259936  |
| C      | 2.151599  | 1.434305  | -0.573014 |



|   |           |           |           |
|---|-----------|-----------|-----------|
| C | 1.950465  | 3.880563  | -0.596754 |
| F | -0.305055 | -2.087431 | 0.503227  |
| C | 1.471292  | 2.616894  | -0.308117 |
| B | 1.425881  | 0.003628  | -0.262481 |
| F | 1.234285  | 4.971388  | -0.309736 |
| F | 0.258305  | 2.566492  | 0.276902  |
| C | 2.351246  | -1.299821 | -0.569314 |
| F | 3.894477  | -0.646756 | 1.083340  |
| F | 0.930790  | -2.145146 | -2.270384 |
| C | 3.500906  | -1.545729 | 0.166320  |
| C | 2.025823  | -2.268379 | -1.502213 |
| C | 4.294906  | -2.664500 | -0.003357 |
| C | 2.789441  | -3.409823 | -1.705381 |
| F | 5.400249  | -2.848996 | 0.723174  |
| F | 2.435759  | -4.318733 | -2.619243 |
| C | 3.930548  | -3.607948 | -0.951116 |
| F | 3.681127  | 5.213955  | -1.485952 |
| F | 4.677082  | -4.697554 | -1.134120 |
| F | -0.883745 | -0.878821 | 4.979600  |
| H | -1.063681 | 1.720507  | -1.760874 |
| C | -2.487654 | 0.214713  | 0.137280  |
| C | -3.155688 | -0.971986 | 0.464821  |
| C | -2.358935 | 1.207518  | 1.119277  |
| C | -3.688549 | -1.159253 | 1.736559  |
| H | -3.266188 | -1.758582 | -0.276582 |
| C | -2.878778 | 1.014442  | 2.395095  |
| H | -1.838744 | 2.131046  | 0.893474  |
| C | -3.547443 | -0.168127 | 2.703229  |
| H | -4.197287 | -2.085047 | 1.976311  |
| H | -2.754036 | 1.781571  | 3.150797  |
| H | -3.944466 | -0.322560 | 3.699936  |
| C | -5.400688 | 0.161873  | -1.463104 |
| C | -6.331162 | -0.751492 | -0.983260 |
| C | -4.493042 | -0.126435 | -2.485528 |
| C | -6.335971 | -1.998675 | -1.588157 |
| H | -7.007987 | -0.510036 | -0.173376 |
| C | -4.508473 | -1.388109 | -3.077394 |
| C | -5.441435 | -2.309651 | -2.623136 |
| H | -7.041132 | -2.748567 | -1.252819 |
| H | -3.810189 | -1.641703 | -3.865484 |
| H | -5.478179 | -3.294491 | -3.071778 |
| C | -3.596926 | 1.041475  | -2.610564 |
| C | -4.177259 | 2.009003  | -1.718139 |
| H | -3.214665 | 1.374016  | -3.572805 |

|   |           |          |           |
|---|-----------|----------|-----------|
| N | -5.156259 | 1.478449 | -1.024857 |
| C | -5.814163 | 2.068785 | 0.136959  |
| H | -6.892161 | 2.056095 | -0.015711 |
| H | -5.547920 | 1.480383 | 1.017376  |
| H | -5.465000 | 3.091350 | 0.256437  |
| H | -3.847242 | 3.022270 | -1.529266 |

#### 4

| Symbol | X         | Y         | Z         |
|--------|-----------|-----------|-----------|
| Si     | 3.157224  | 2.340074  | -1.486532 |
| H      | -0.511034 | -0.603451 | 0.176836  |
| H      | 4.503660  | 2.946876  | -1.427692 |
| F      | -4.929187 | -2.647598 | -3.013306 |
| F      | -4.785551 | -0.997377 | 4.041166  |
| F      | -4.042117 | -0.447207 | -1.794539 |
| C      | -3.906853 | -2.731634 | -2.160324 |
| C      | -2.831483 | 0.262524  | 4.362833  |
| C      | -3.668075 | -0.470231 | 3.538919  |
| C      | -3.418015 | -1.602552 | -1.521251 |
| C      | -3.327394 | -3.963288 | -1.908489 |
| F      | -0.856653 | 1.527431  | 4.608495  |
| C      | -1.679777 | 0.816980  | 3.833107  |
| F      | -4.212688 | -1.348233 | 1.467584  |
| C      | -3.337870 | -0.647224 | 2.203145  |
| C      | -1.395576 | 0.613705  | 2.494353  |
| C      | -2.185714 | -0.128163 | 1.630051  |
| C      | -2.355442 | -1.632005 | -0.630908 |
| C      | -2.276430 | -4.046973 | -1.012168 |
| F      | -0.263356 | 1.188179  | 2.032978  |
| C      | -1.829788 | -2.893320 | -0.390378 |
| B      | -1.685190 | -0.337864 | 0.092604  |
| F      | -1.699677 | -5.225991 | -0.767407 |
| F      | -0.806482 | -3.042062 | 0.476255  |
| C      | -1.800928 | 1.034562  | -0.780397 |
| F      | -3.820072 | 1.731265  | 0.237133  |
| F      | 0.196550  | 0.551951  | -1.981010 |
| C      | -2.820367 | 1.965534  | -0.625801 |
| C      | -0.854558 | 1.371066  | -1.735113 |
| C      | -2.883111 | 3.154773  | -1.332701 |
| C      | -0.890613 | 2.532113  | -2.489501 |
| F      | -3.865134 | 4.032631  | -1.117261 |
| F      | 0.047713  | 2.786634  | -3.404227 |
| C      | -1.909602 | 3.439654  | -2.274657 |
| F      | -3.778523 | -5.056495 | -2.520634 |

F -1.948621 4.583300 -2.955449  
 F -3.134510 0.434952 5.647959  
 H 2.836910 1.998845 -2.887363  
 C 1.830654 3.452881 -0.790790  
 C 1.137649 3.190433 0.392282  
 C 1.475261 4.589220 -1.533822  
 C 0.095296 4.013432 0.811839  
 H 1.398758 2.337034 1.006521  
 C 0.449856 5.424524 -1.110138  
 H 1.988253 4.816124 -2.463636  
 C -0.249950 5.129350 0.058635  
 H -0.441910 3.775488 1.722069  
 H 0.181281 6.293038 -1.699430  
 H -1.067651 5.766468 0.375743  
 C 3.951919 0.026042 1.616605  
 C 4.703783 -0.224852 2.752911  
 C 4.479329 0.553802 0.439850  
 C 6.059880 0.063510 2.668244  
 H 4.265360 -0.632008 3.655216  
 C 5.836958 0.837715 0.371680  
 C 6.617463 0.581374 1.494249  
 H 6.695803 -0.118454 3.525365  
 H 6.278653 1.238552 -0.532714  
 H 7.679765 0.789326 1.462028  
 C 3.372943 0.647964 -0.558800  
 C 2.238739 0.094915 0.184080  
 H 3.559660 0.004815 -1.437017  
 N 2.574720 -0.232493 1.398415  
 C 1.707954 -0.847539 2.403391  
 H 2.213993 -1.730932 2.789170  
 H 1.527919 -0.130013 3.203879  
 H 0.769755 -1.129904 1.928460  
 H 1.227157 -0.061937 -0.169846  
 C 4.467513 -2.426718 -1.235234  
 C 3.113004 -2.712745 -0.934720  
 C 2.713515 -3.265757 0.287780  
 C 3.704432 -3.505702 1.223106  
 C 5.057133 -3.206108 0.956136  
 C 5.446242 -2.674952 -0.257858  
 C 4.487082 -1.892809 -2.566045  
 C 3.186427 -1.876578 -3.002088  
 H 1.671548 -3.492619 0.489092  
 H 3.437966 -3.941696 2.179395  
 H 6.488191 -2.450154 -0.455593

H 5.348690 -1.572750 -3.130396  
 N 2.351321 -2.356843 -2.023629  
 C 0.913909 -2.542471 -2.123980  
 H 0.657647 -3.585762 -1.923045  
 H 0.392772 -1.900034 -1.412087  
 H 0.595036 -2.281151 -3.131287  
 H 5.800610 -3.398991 1.720273  
 H 2.776131 -1.552184 -3.946858

**5**

| Symbol | X         | Y         | Z         |
|--------|-----------|-----------|-----------|
| Si     | 2.987091  | 2.803880  | -0.746273 |
| H      | -0.442863 | -0.598927 | 0.247372  |
| H      | 4.183158  | 3.662431  | -0.551914 |
| F      | -4.500275 | -2.969617 | -3.230474 |
| F      | -5.280405 | -1.181652 | 3.484206  |
| F      | -3.859662 | -0.735859 | -1.935810 |
| C      | -3.508945 | -2.986217 | -2.338190 |
| C      | -3.278806 | -0.194881 | 4.218935  |
| C      | -4.052894 | -0.736759 | 3.207546  |
| C      | -3.146242 | -1.834821 | -1.656406 |
| C      | -2.836335 | -4.169810 | -2.087256 |
| F      | -1.257212 | 0.802561  | 4.891852  |
| C      | -2.011722 | 0.274941  | 3.924983  |
| F      | -4.357742 | -1.321005 | 0.988798  |
| C      | -3.543727 | -0.804522 | 1.920642  |
| C      | -1.545535 | 0.186783  | 2.622904  |
| C      | -2.275073 | -0.358122 | 1.576452  |
| C      | -2.123088 | -1.789409 | -0.718824 |
| C      | -1.816131 | -4.181255 | -1.153641 |
| F      | -0.307068 | 0.672667  | 2.405229  |
| C      | -1.495036 | -3.006847 | -0.491856 |
| B      | -1.624550 | -0.454700 | 0.083339  |
| F      | -1.149795 | -5.312096 | -0.907074 |
| F      | -0.486659 | -3.094887 | 0.401741  |
| C      | -1.824808 | 0.926179  | -0.768868 |
| F      | -4.024055 | 1.316336  | 0.013896  |
| F      | 0.360770  | 0.792094  | -1.708343 |
| C      | -2.975153 | 1.705452  | -0.724064 |
| C      | -0.830054 | 1.429219  | -1.592723 |
| C      | -3.126857 | 2.891520  | -1.422351 |
| C      | -0.947424 | 2.588871  | -2.341000 |
| F      | -4.243554 | 3.614987  | -1.314052 |
| F      | 0.046054  | 2.993643  | -3.136520 |

|   |           |           |           |
|---|-----------|-----------|-----------|
| C | -2.104306 | 3.336371  | -2.242182 |
| F | -3.168399 | -5.284915 | -2.734987 |
| F | -2.229688 | 4.478402  | -2.915264 |
| F | -3.752674 | -0.121744 | 5.461856  |
| H | 2.927873  | 2.513550  | -2.207076 |
| C | 1.421181  | 3.740044  | -0.291648 |
| C | 0.604753  | 3.373961  | 0.783179  |
| C | 1.035933  | 4.841478  | -1.069522 |
| C | -0.573474 | 4.065722  | 1.057573  |
| H | 0.879916  | 2.539700  | 1.417792  |
| C | -0.129718 | 5.544994  | -0.791275 |
| H | 1.644802  | 5.146443  | -1.915910 |
| C | -0.943307 | 5.149631  | 0.269114  |
| H | -1.198570 | 3.755599  | 1.887582  |
| H | -0.413933 | 6.389544  | -1.407988 |
| H | -1.864088 | 5.683781  | 0.475132  |
| C | 4.061625  | -0.290691 | 1.743553  |
| C | 4.982375  | -0.959926 | 2.552760  |
| C | 4.420122  | 0.814821  | 0.934109  |
| C | 6.295283  | -0.524736 | 2.515067  |
| H | 4.683156  | -1.792888 | 3.178608  |
| C | 5.761525  | 1.225774  | 0.912032  |
| C | 6.682978  | 0.551981  | 1.695422  |
| H | 7.039175  | -1.020708 | 3.127135  |
| H | 6.068640  | 2.065859  | 0.298057  |
| H | 7.720404  | 0.865573  | 1.691546  |
| C | 3.219212  | 1.270423  | 0.266893  |
| C | 2.226627  | 0.416639  | 0.701787  |
| H | 4.709989  | 0.658489  | -2.059726 |
| N | 2.714557  | -0.515102 | 1.572226  |
| C | 1.925018  | -1.504173 | 2.283879  |
| H | 2.449980  | -2.461012 | 2.281731  |
| H | 1.749170  | -1.187546 | 3.314433  |
| H | 0.967035  | -1.620582 | 1.777078  |
| H | 1.172797  | 0.417013  | 0.467928  |
| C | 4.697906  | -1.442797 | -1.470405 |
| C | 3.487039  | -2.088425 | -1.253367 |
| C | 3.320507  | -3.165240 | -0.400948 |
| C | 4.467353  | -3.600016 | 0.257171  |
| C | 5.698833  | -2.972834 | 0.052727  |
| C | 5.830808  | -1.886764 | -0.809051 |
| C | 4.458257  | -0.331810 | -2.449986 |
| C | 2.996138  | -0.450737 | -2.701409 |
| H | 2.356664  | -3.635635 | -0.243431 |

|   |          |           |           |
|---|----------|-----------|-----------|
| H | 4.400983 | -4.437007 | 0.941015  |
| H | 6.787172 | -1.398414 | -0.945808 |
| H | 5.000842 | -0.456807 | -3.394479 |
| N | 2.492915 | -1.444743 | -2.053237 |
| C | 1.102582 | -1.892957 | -2.052175 |
| H | 1.092237 | -2.965236 | -2.246951 |
| H | 0.684912 | -1.675368 | -1.068943 |
| H | 0.550489 | -1.357395 | -2.818193 |
| H | 6.568192 | -3.328919 | 0.591448  |
| H | 2.381776 | 0.169996  | -3.341210 |

## 6

| Symbol | X         | Y         | Z         |
|--------|-----------|-----------|-----------|
| Si     | -3.176230 | 1.524231  | 1.787530  |
| H      | -3.504391 | 1.263771  | 3.211945  |
| H      | -1.895183 | 2.274566  | 1.754346  |
| C      | -4.492085 | 2.598848  | 0.986071  |
| C      | -5.809223 | 2.137976  | 0.849395  |
| C      | -4.185020 | 3.873205  | 0.495757  |
| C      | -6.784569 | 2.922707  | 0.243949  |
| H      | -6.077186 | 1.151873  | 1.218347  |
| C      | -5.157889 | 4.663026  | -0.111768 |
| H      | -3.173383 | 4.255768  | 0.586756  |
| C      | -6.458389 | 4.187850  | -0.238762 |
| H      | -7.797673 | 2.549860  | 0.147541  |
| H      | -4.900361 | 5.647003  | -0.486372 |
| H      | -7.217033 | 4.800284  | -0.712005 |
| C      | -2.557241 | -2.210093 | 0.159065  |
| C      | -1.994152 | -3.488717 | 0.163404  |
| C      | -2.340051 | -1.278265 | 1.201161  |
| C      | -1.196282 | -3.825622 | 1.243373  |
| H      | -2.172494 | -4.187665 | -0.645620 |
| C      | -1.526731 | -1.651363 | 2.280794  |
| C      | -0.964682 | -2.916032 | 2.292351  |
| H      | -0.740597 | -4.807849 | 1.282477  |
| H      | -1.342120 | -0.959342 | 3.095894  |
| H      | -0.334435 | -3.215522 | 3.121143  |
| C      | -3.068643 | -0.076604 | 0.864433  |
| C      | -3.673228 | -0.349043 | -0.341528 |
| N      | -3.377132 | -1.614724 | -0.771778 |
| C      | -3.845035 | -2.246279 | -1.989653 |
| H      | -2.999839 | -2.533987 | -2.618004 |
| H      | -4.436450 | -3.134045 | -1.756490 |
| H      | -4.466703 | -1.538773 | -2.534655 |

H -4.313897 0.284475 -0.939698

**7**

| Symbol | X         | Y         | Z         |
|--------|-----------|-----------|-----------|
| H      | 0.429365  | 0.035005  | 1.742730  |
| F      | 2.038899  | -2.782695 | -3.246179 |
| F      | -3.436916 | 0.137589  | -2.460938 |
| F      | 1.218315  | -0.442320 | -2.214816 |
| C      | 1.789501  | -2.677368 | -1.940556 |
| C      | -2.987579 | 2.069929  | -1.203401 |
| C      | -2.658897 | 0.788014  | -1.593624 |
| C      | 1.366903  | -1.484615 | -1.384329 |
| C      | 1.952799  | -3.783905 | -1.120471 |
| F      | -2.521580 | 3.938005  | 0.148185  |
| C      | -2.190691 | 2.715582  | -0.272730 |
| F      | -1.368345 | -1.116656 | -1.412436 |
| C      | -1.544152 | 0.169553  | -1.043177 |
| C      | -1.078112 | 2.065017  | 0.226170  |
| C      | -0.691881 | 0.778083  | -0.135450 |
| C      | 1.072348  | -1.322748 | -0.035830 |
| C      | 1.694221  | -3.669153 | 0.231905  |
| F      | -0.349087 | 2.737294  | 1.134542  |
| C      | 1.274124  | -2.447993 | 0.741813  |
| B      | 0.643813  | 0.136416  | 0.555800  |
| F      | 1.831630  | -4.730362 | 1.030018  |
| F      | 1.025193  | -2.425841 | 2.069385  |
| C      | 1.971508  | 1.081143  | 0.402155  |
| F      | 1.208236  | 2.463943  | -1.371283 |
| F      | 2.979763  | -0.189506 | 2.120264  |
| C      | 2.170792  | 2.111530  | -0.504567 |
| C      | 3.058164  | 0.809070  | 1.224647  |
| C      | 3.350225  | 2.838556  | -0.583147 |
| C      | 4.252556  | 1.507033  | 1.180525  |
| F      | 3.485997  | 3.824575  | -1.473009 |
| F      | 5.259970  | 1.200953  | 2.001694  |
| C      | 4.398486  | 2.535212  | 0.265404  |
| F      | 2.350658  | -4.945774 | -1.634019 |
| F      | 5.539087  | 3.221120  | 0.200462  |
| F      | -4.086193 | 2.657341  | -1.672663 |
| H      | -1.717472 | 1.014103  | 2.610865  |
| C      | -3.528605 | 0.106780  | 1.758003  |
| C      | -3.428563 | -1.104364 | 1.079095  |
| C      | -4.301534 | -1.515034 | 0.090722  |
| C      | -5.335280 | -0.632026 | -0.215308 |

|   |           |           |           |
|---|-----------|-----------|-----------|
| C | -5.461587 | 0.588348  | 0.447960  |
| C | -4.561629 | 0.972775  | 1.443537  |
| C | -2.404449 | 0.172750  | 2.752051  |
| C | -1.697324 | -1.111393 | 2.504345  |
| H | -4.185359 | -2.455794 | -0.432037 |
| H | -6.042911 | -0.894677 | -0.990844 |
| H | -4.664083 | 1.927489  | 1.945444  |
| H | -2.746627 | 0.207627  | 3.792679  |
| N | -2.284427 | -1.800198 | 1.583347  |
| C | -1.884148 | -3.116575 | 1.085839  |
| H | -2.743983 | -3.781999 | 1.144873  |
| H | -1.559595 | -3.004153 | 0.051038  |
| H | -1.074260 | -3.491970 | 1.704970  |
| H | -6.271470 | 1.254610  | 0.179053  |
| H | -0.815488 | -1.485121 | 3.006467  |

**8**

| Symbol | X         | Y         | Z         |
|--------|-----------|-----------|-----------|
| H      | -0.501761 | -0.452452 | 1.738608  |
| F      | 5.156207  | -1.792907 | -1.699682 |
| F      | -2.939846 | -3.002131 | -1.846680 |
| F      | 3.151132  | -0.017922 | -1.917645 |
| C      | 4.060323  | -1.937013 | -0.963685 |
| C      | -3.325641 | -0.686328 | -1.914019 |
| C      | -2.490394 | -1.765613 | -1.668396 |
| C      | 3.016865  | -1.033144 | -1.057213 |
| C      | 3.948913  | -3.003311 | -0.086929 |
| F      | -3.650639 | 1.638665  | -1.971705 |
| C      | -2.868188 | 0.602953  | -1.703957 |
| F      | -0.441140 | -2.620193 | -1.069653 |
| C      | -1.197399 | -1.539514 | -1.243271 |
| C      | -1.595728 | 0.793846  | -1.199703 |
| C      | -0.692913 | -0.257775 | -0.973588 |
| C      | 1.841368  | -1.158612 | -0.324372 |
| C      | 2.799785  | -3.157559 | 0.671645  |
| F      | -1.267416 | 2.053640  | -0.930755 |
| C      | 1.769131  | -2.244875 | 0.536430  |
| B      | 0.756966  | -0.022210 | -0.481168 |
| F      | 2.698006  | -4.175891 | 1.518443  |
| F      | 0.687452  | -2.429669 | 1.295429  |
| C      | 1.306276  | 1.416760  | -0.139620 |
| F      | 0.997169  | 2.208170  | -2.330856 |
| F      | 1.715077  | 0.759531  | 2.087100  |
| C      | 1.413174  | 2.429320  | -1.082603 |

|   |           |           |           |
|---|-----------|-----------|-----------|
| C | 1.785807  | 1.694831  | 1.131894  |
| C | 1.957344  | 3.663681  | -0.784493 |
| C | 2.318742  | 2.926554  | 1.473442  |
| F | 2.055934  | 4.610323  | -1.710968 |
| F | 2.746254  | 3.167312  | 2.707789  |
| C | 2.406557  | 3.911621  | 0.504673  |
| F | 4.938484  | -3.876200 | 0.024939  |
| F | 2.924246  | 5.092963  | 0.807178  |
| F | -4.553283 | -0.891549 | -2.347702 |
| H | -1.139769 | 1.838459  | 1.923107  |
| C | -3.092555 | 0.874413  | 1.724653  |
| C | -3.338825 | -0.508908 | 1.768281  |
| C | -4.462649 | -1.053674 | 1.154003  |
| C | -5.368974 | -0.177606 | 0.545590  |
| C | -5.149712 | 1.193501  | 0.530794  |
| C | -3.994743 | 1.725922  | 1.121837  |
| C | -1.796820 | 1.146923  | 2.455816  |
| C | -1.189784 | -0.263654 | 2.572835  |
| H | -4.642055 | -2.122285 | 1.151061  |
| H | -6.252198 | -0.584454 | 0.067008  |
| H | -3.804868 | 2.793423  | 1.088507  |
| H | -1.998881 | 1.568587  | 3.444784  |
| N | -2.344874 | -1.162012 | 2.482271  |
| C | -2.115428 | -2.573790 | 2.263818  |
| H | -3.011722 | -3.140243 | 2.522117  |
| H | -1.844020 | -2.800034 | 1.222004  |
| H | -1.303609 | -2.907772 | 2.909795  |
| H | -5.858485 | 1.850442  | 0.042716  |
| H | -0.639257 | -0.429515 | 3.500009  |

## 9

| Symbol | X         | Y         | Z         |
|--------|-----------|-----------|-----------|
| F      | -3.791179 | -4.085149 | -1.716314 |
| F      | -4.829964 | 2.440748  | -1.126469 |
| F      | -2.195034 | -1.933357 | -1.965724 |
| C      | -3.291830 | -3.490483 | -0.630298 |
| C      | -2.674076 | 3.300201  | -1.478299 |
| C      | -3.505850 | 2.272188  | -1.083233 |
| C      | -2.464625 | -2.386968 | -0.730603 |
| C      | -3.604243 | -3.982900 | 0.626909  |
| F      | -0.482838 | 4.108134  | -1.763548 |
| C      | -1.304617 | 3.117720  | -1.408193 |
| F      | -3.853846 | 0.151904  | -0.240888 |
| C      | -2.960156 | 1.080648  | -0.621563 |

|    |           |           |           |
|----|-----------|-----------|-----------|
| C  | -0.812060 | 1.920218  | -0.929624 |
| C  | -1.595422 | 0.846842  | -0.523545 |
| C  | -1.926647 | -1.727388 | 0.364705  |
| C  | -3.088562 | -3.361813 | 1.749028  |
| F  | 0.536613  | 1.832602  | -0.853921 |
| C  | -2.264932 | -2.253924 | 1.599666  |
| B  | -0.915573 | -0.467141 | 0.170164  |
| F  | -3.388699 | -3.834819 | 2.962005  |
| F  | -1.807296 | -1.700299 | 2.734406  |
| C  | 0.407494  | -1.056209 | -0.600371 |
| F  | 0.004673  | -0.112674 | -2.737298 |
| F  | 1.056133  | -2.095871 | 1.429662  |
| C  | 0.766535  | -0.858642 | -1.926214 |
| C  | 1.287156  | -1.853066 | 0.122779  |
| C  | 1.923521  | -1.379403 | -2.489498 |
| C  | 2.446965  | -2.397693 | -0.400106 |
| F  | 2.246666  | -1.114033 | -3.756360 |
| F  | 3.283269  | -3.104175 | 0.372505  |
| C  | 2.772201  | -2.155908 | -1.722363 |
| F  | -4.397194 | -5.047013 | 0.752049  |
| F  | 3.896495  | -2.645639 | -2.242127 |
| F  | -3.177034 | 4.466851  | -1.882013 |
| C  | 4.249827  | -0.178043 | 0.796097  |
| C  | 5.343715  | -0.675281 | 0.106305  |
| C  | 3.345566  | 0.740739  | 0.263902  |
| C  | 5.513182  | -0.206529 | -1.191399 |
| H  | 6.019706  | -1.399501 | 0.542419  |
| C  | 3.533536  | 1.203646  | -1.032502 |
| C  | 4.620913  | 0.714054  | -1.750545 |
| H  | 6.343140  | -0.571247 | -1.782554 |
| H  | 2.840557  | 1.905726  | -1.478825 |
| H  | 4.774570  | 1.045373  | -2.769928 |
| C  | 2.305951  | 1.010134  | 1.300389  |
| C  | 2.693157  | 0.101972  | 2.374478  |
| H  | 1.273585  | 0.817135  | 0.984533  |
| N  | 3.791413  | -0.536076 | 2.092356  |
| C  | 4.465709  | -1.524413 | 2.931480  |
| H  | 4.505181  | -2.465225 | 2.384949  |
| H  | 5.472492  | -1.172434 | 3.152031  |
| H  | 3.900393  | -1.647868 | 3.850938  |
| H  | 2.173145  | -0.073071 | 3.307651  |
| Si | 2.214947  | 2.889668  | 1.841064  |
| H  | -0.552618 | -0.109078 | 1.267254  |
| H  | 2.960286  | 3.648805  | 0.818816  |

|   |           |          |          |
|---|-----------|----------|----------|
| C | 0.423848  | 3.405935 | 1.853109 |
| C | 0.045649  | 4.612313 | 1.250304 |
| C | -0.572756 | 2.587922 | 2.399396 |
| C | -1.292307 | 4.990026 | 1.194612 |
| H | 0.795395  | 5.255201 | 0.800992 |
| C | -1.912291 | 2.954516 | 2.328872 |
| H | -0.316467 | 1.641624 | 2.865989 |
| C | -2.271804 | 4.157120 | 1.726920 |
| H | -1.571948 | 5.919335 | 0.712199 |
| H | -2.673200 | 2.298039 | 2.734333 |
| H | -3.316675 | 4.438726 | 1.660900 |
| H | 2.877783  | 2.991255 | 3.158840 |

**10**

| Symbol | X         | Y         | Z         |
|--------|-----------|-----------|-----------|
| F      | -1.049714 | 5.173519  | -1.905241 |
| F      | 4.352379  | 1.092314  | -2.025673 |
| F      | -0.868217 | 2.517122  | -2.339679 |
| C      | -0.788185 | 4.348953  | -0.896746 |
| C      | 3.441762  | -1.069246 | -2.071312 |
| C      | 3.318771  | 0.282987  | -1.819664 |
| C      | -0.701774 | 2.983686  | -1.095969 |
| C      | -0.592544 | 4.857136  | 0.378115  |
| F      | 2.482067  | -3.213676 | -2.071539 |
| C      | 2.361236  | -1.908055 | -1.851692 |
| F      | 2.111351  | 2.090631  | -1.056607 |
| C      | 2.125332  | 0.781962  | -1.320511 |
| C      | 1.184146  | -1.373949 | -1.366436 |
| C      | 1.014686  | -0.020411 | -1.077527 |
| C      | -0.422907 | 2.088600  | -0.074345 |
| C      | -0.311696 | 3.997954  | 1.426031  |
| F      | 0.182503  | -2.228526 | -1.139155 |
| C      | -0.229511 | 2.636915  | 1.181474  |
| B      | -0.356297 | 0.532334  | -0.456066 |
| F      | -0.126082 | 4.480970  | 2.650701  |
| F      | 0.044043  | 1.843589  | 2.233526  |
| C      | -1.756265 | -0.059067 | -0.963383 |
| F      | -0.980472 | -0.765964 | -3.084174 |
| F      | -2.738514 | 0.642001  | 1.059546  |
| C      | -1.971394 | -0.660639 | -2.195879 |
| C      | -2.868815 | 0.047297  | -0.139768 |
| C      | -3.205526 | -1.166717 | -2.568791 |
| C      | -4.113097 | -0.454485 | -0.469279 |
| F      | -3.371599 | -1.742357 | -3.755889 |

|    |           |           |           |
|----|-----------|-----------|-----------|
| F  | -5.131269 | -0.373860 | 0.381613  |
| C  | -4.277562 | -1.072363 | -1.696312 |
| F  | -0.673284 | 6.163935  | 0.592317  |
| F  | -5.457700 | -1.574640 | -2.034605 |
| F  | 4.591782  | -1.566518 | -2.499875 |
| C  | -1.747949 | -1.813200 | 2.544675  |
| C  | -3.126208 | -1.980932 | 2.367690  |
| C  | -0.786475 | -2.587299 | 1.857339  |
| C  | -3.531472 | -2.940708 | 1.460054  |
| H  | -3.843725 | -1.375214 | 2.908389  |
| C  | -1.235055 | -3.555705 | 0.942781  |
| C  | -2.593412 | -3.717300 | 0.749695  |
| H  | -4.590270 | -3.093838 | 1.285302  |
| H  | -0.523338 | -4.155853 | 0.389037  |
| H  | -2.949212 | -4.458286 | 0.044041  |
| C  | 0.522417  | -2.142618 | 2.296074  |
| C  | 0.268851  | -1.149721 | 3.222337  |
| H  | -0.626905 | 0.086787  | 1.011876  |
| N  | -1.072641 | -0.927330 | 3.356340  |
| C  | -1.704828 | 0.038369  | 4.237550  |
| H  | -2.405565 | 0.650329  | 3.667896  |
| H  | -2.237626 | -0.470178 | 5.042924  |
| H  | -0.936515 | 0.681896  | 4.660600  |
| H  | 0.960483  | -0.559575 | 3.807366  |
| Si | 2.177173  | -2.795363 | 1.763762  |
| H  | 0.032114  | -0.281671 | 0.823469  |
| H  | 1.980901  | -3.606071 | 0.537083  |
| C  | 3.404980  | -1.416309 | 1.379579  |
| C  | 4.652410  | -1.768506 | 0.841418  |
| C  | 3.152784  | -0.059222 | 1.608245  |
| C  | 5.608231  | -0.804119 | 0.542617  |
| H  | 4.879061  | -2.812060 | 0.638824  |
| C  | 4.111769  | 0.911916  | 1.323144  |
| H  | 2.193982  | 0.261817  | 2.004113  |
| C  | 5.340527  | 0.540403  | 0.790819  |
| H  | 6.558761  | -1.099171 | 0.114254  |
| H  | 3.891837  | 1.957239  | 1.506874  |
| H  | 6.082791  | 1.294192  | 0.557519  |
| H  | 2.777969  | -3.676134 | 2.794176  |

**11**

| Symbol | X         | Y         | Z        |
|--------|-----------|-----------|----------|
| Si     | -2.547091 | -3.567803 | 0.535120 |
| H      | 0.360386  | 0.574100  | 0.300568 |

|   |           |           |           |   |           |           |           |
|---|-----------|-----------|-----------|---|-----------|-----------|-----------|
| H | -2.839091 | -3.508190 | 1.982949  | H | 2.386599  | -3.673715 | 1.301859  |
| F | 2.934399  | 3.566373  | -3.800729 | H | 0.939341  | -6.274010 | -1.790029 |
| F | 5.440967  | 1.445501  | 3.102123  | H | 2.815126  | -5.383340 | -0.442178 |
| F | 2.818910  | 1.157205  | -2.694663 | C | -4.192108 | -0.515656 | 1.369912  |
| C | 2.413002  | 3.431481  | -2.579659 | C | -5.289256 | -0.036082 | 2.064824  |
| C | 3.620543  | 0.242209  | 3.969486  | C | -4.280978 | -1.417105 | 0.305577  |
| C | 4.234956  | 0.905184  | 2.920825  | C | -6.532000 | -0.489293 | 1.638627  |
| C | 2.338128  | 2.183707  | -1.974724 | H | -5.189771 | 0.666767  | 2.882295  |
| C | 1.940824  | 4.545963  | -1.912106 | C | -5.531145 | -1.866349 | -0.101370 |
| F | 1.760807  | -0.952596 | 4.779683  | C | -6.650714 | -1.382712 | 0.569692  |
| C | 2.370122  | -0.316074 | 3.776791  | H | -7.424787 | -0.136722 | 2.139458  |
| F | 4.247849  | 1.649391  | 0.729579  | H | -5.632840 | -2.566467 | -0.921890 |
| C | 3.590920  | 0.996117  | 1.696662  | H | -7.636340 | -1.708088 | 0.260688  |
| C | 1.767287  | -0.195761 | 2.535634  | C | -2.891689 | -1.752184 | -0.111898 |
| C | 2.337417  | 0.450896  | 1.451310  | C | -2.089100 | -0.841602 | 0.693027  |
| C | 1.803317  | 1.982091  | -0.711527 | H | -2.636817 | -1.764992 | -1.171406 |
| C | 1.411026  | 4.397141  | -0.641397 | N | -2.825666 | -0.203135 | 1.560467  |
| F | 0.536468  | -0.750727 | 2.426158  | C | -2.346301 | 0.709986  | 2.595716  |
| C | 1.369022  | 3.137039  | -0.072379 | H | -2.856734 | 1.665878  | 2.475866  |
| B | 1.539155  | 0.555227  | 0.031104  | H | -2.571474 | 0.283646  | 3.572927  |
| F | 0.933203  | 5.461058  | 0.008997  | H | -1.271512 | 0.830127  | 2.480448  |
| F | 0.846880  | 3.056395  | 1.165279  | H | -1.015077 | -0.701899 | 0.666905  |
| C | 1.817748  | -0.749567 | -0.911932 | H | -1.772974 | 2.697344  | -2.392819 |
| F | 4.135706  | -0.816803 | -0.445022 | H | -1.468882 | 3.787869  | -0.257961 |
| F | -0.456674 | -0.884364 | -1.588701 | C | -3.390772 | 2.766119  | -0.058056 |
| C | 3.067129  | -1.336990 | -1.066231 | C | -3.910473 | 1.775049  | -0.905165 |
| C | 0.807641  | -1.362518 | -1.635524 | C | -5.282314 | 1.572582  | -1.012742 |
| C | 3.299958  | -2.448039 | -1.858662 | C | -6.124403 | 2.348193  | -0.213460 |
| C | 0.988421  | -2.472118 | -2.444580 | C | -5.616882 | 3.303056  | 0.660919  |
| F | 4.516044  | -2.992457 | -1.941058 | C | -4.235142 | 3.519431  | 0.735539  |
| F | -0.041385 | -3.018120 | -3.096801 | C | -1.888252 | 2.781730  | -0.219694 |
| C | 2.250651  | -3.020081 | -2.556490 | C | -1.712903 | 2.008984  | -1.535718 |
| F | 1.996353  | 5.748625  | -2.482179 | H | -5.693795 | 0.829262  | -1.684721 |
| F | 2.448776  | -4.114215 | -3.289226 | H | -7.196043 | 2.197717  | -0.279036 |
| F | 4.226183  | 0.144764  | 5.151502  | H | -3.833679 | 4.285830  | 1.390430  |
| H | -3.521603 | -4.399657 | -0.197386 | H | -1.390093 | 2.248582  | 0.596780  |
| C | -0.802752 | -4.114700 | 0.186274  | N | -2.871383 | 1.097319  | -1.550250 |
| C | 0.270236  | -3.621202 | 0.942159  | C | -3.148278 | 0.421716  | -2.800466 |
| C | -0.543036 | -5.073777 | -0.801203 | H | -3.939062 | -0.318111 | -2.654804 |
| C | 1.565928  | -4.071082 | 0.715617  | H | -3.463596 | 1.120820  | -3.588364 |
| H | 0.100630  | -2.886002 | 1.722210  | H | -2.247824 | -0.099801 | -3.127666 |
| C | 0.751339  | -5.533535 | -1.022135 | H | -6.290729 | 3.894946  | 1.268022  |
| H | -1.355475 | -5.470431 | -1.401130 | H | -0.781363 | 1.447726  | -1.589442 |
| C | 1.804538  | -5.033187 | -0.262434 |   |           |           |           |

## 12

| Symbol | X         | Y         | Z         |
|--------|-----------|-----------|-----------|
| Si     | 2.658773  | 3.241873  | -0.840299 |
| H      | -0.346585 | -0.555646 | 0.210935  |
| H      | 3.763143  | 4.220353  | -0.686523 |
| F      | -4.353102 | -3.126968 | -3.178642 |
| F      | -5.011654 | -1.584543 | 3.596244  |
| F      | -3.873636 | -0.914140 | -1.775942 |
| C      | -3.309984 | -3.084266 | -2.347728 |
| C      | -3.052209 | -0.494652 | 4.298073  |
| C      | -3.826742 | -1.049890 | 3.293951  |
| C      | -3.031055 | -1.942597 | -1.612413 |
| C      | -2.497580 | -4.197437 | -2.215800 |
| F      | -1.076691 | 0.611522  | 4.937181  |
| C      | -1.830825 | 0.069412  | 3.978044  |
| F      | -4.175378 | -1.568741 | 1.064793  |
| C      | -3.362722 | -1.036420 | 1.988406  |
| C      | -1.409115 | 0.059247  | 2.657863  |
| C      | -2.139288 | -0.495425 | 1.617127  |
| C      | -1.958792 | -1.838994 | -0.736647 |
| C      | -1.427470 | -4.150395 | -1.341174 |
| F      | -0.213214 | 0.635645  | 2.418174  |
| C      | -1.192633 | -2.989637 | -0.622187 |
| B      | -1.541928 | -0.498977 | 0.099195  |
| F      | -0.630369 | -5.216038 | -1.203880 |
| F      | -0.136179 | -3.022291 | 0.215559  |
| C      | -1.882453 | 0.874920  | -0.715258 |
| F      | -4.034205 | 1.165103  | 0.230049  |
| F      | 0.227002  | 0.824632  | -1.807955 |
| C      | -3.062420 | 1.597213  | -0.586606 |
| C      | -0.973599 | 1.417381  | -1.609583 |
| C      | -3.318696 | 2.769975  | -1.276037 |
| C      | -1.192728 | 2.573804  | -2.340208 |
| F      | -4.455212 | 3.445148  | -1.087411 |
| F      | -0.270290 | 3.034469  | -3.188700 |
| C      | -2.377457 | 3.261120  | -2.164182 |
| F      | -2.747120 | -5.301589 | -2.917237 |
| F      | -2.607784 | 4.392835  | -2.827209 |
| F      | -3.482006 | -0.499067 | 5.559063  |
| H      | 2.624197  | 2.855391  | -2.275904 |
| C      | 1.017314  | 4.032323  | -0.385288 |
| C      | 0.216537  | 3.582479  | 0.670587  |
| C      | 0.562271  | 5.120831  | -1.143443 |
| C      | -1.007137 | 4.187798  | 0.949007  |

|   |           |           |           |
|---|-----------|-----------|-----------|
| H | 0.537395  | 2.750897  | 1.287840  |
| C | -0.649915 | 5.738161  | -0.859014 |
| H | 1.156405  | 5.488148  | -1.975278 |
| C | -1.440979 | 5.266398  | 0.186394  |
| H | -1.620179 | 3.812952  | 1.760996  |
| H | -0.986185 | 6.574730  | -1.459753 |
| H | -2.396886 | 5.732536  | 0.397026  |
| C | 4.118264  | 0.233188  | 1.581307  |
| C | 5.147514  | -0.397063 | 2.289829  |
| C | 4.322745  | 1.415399  | 0.829095  |
| C | 6.404357  | 0.173014  | 2.217893  |
| H | 4.966237  | -1.295660 | 2.867690  |
| C | 5.614928  | 1.967169  | 0.775195  |
| C | 6.637135  | 1.341749  | 1.463857  |
| H | 7.227331  | -0.283907 | 2.753887  |
| H | 5.802558  | 2.870889  | 0.206533  |
| H | 7.636096  | 1.759586  | 1.435344  |
| C | 3.052135  | 1.771368  | 0.228591  |
| C | 2.171370  | 0.792277  | 0.650130  |
| H | 3.593386  | 0.029298  | -0.924962 |
| N | 2.798299  | -0.131315 | 1.439635  |
| C | 2.178982  | -1.299779 | 2.045784  |
| H | 2.822859  | -2.168737 | 1.892722  |
| H | 2.023415  | -1.138427 | 3.113887  |
| H | 1.219251  | -1.477447 | 1.561326  |
| H | 1.119371  | 0.674895  | 0.436125  |
| H | 3.083907  | -1.271334 | -3.475729 |
| H | 1.194356  | -2.453153 | -2.543888 |
| C | 2.771505  | -2.686150 | -1.053941 |
| C | 3.966790  | -1.996356 | -0.928834 |
| C | 5.066718  | -2.470687 | -0.241545 |
| C | 4.939007  | -3.729723 | 0.343827  |
| C | 3.752965  | -4.453131 | 0.226736  |
| C | 2.658984  | -3.940050 | -0.468356 |
| C | 1.777150  | -1.865204 | -1.834736 |
| C | 2.683904  | -0.859803 | -2.548770 |
| H | 5.983008  | -1.901120 | -0.150590 |
| H | 5.775291  | -4.148389 | 0.889071  |
| H | 1.738096  | -4.503503 | -0.548423 |
| H | 1.081010  | -1.357085 | -1.160844 |
| N | 3.864645  | -0.693231 | -1.614114 |
| C | 5.103686  | -0.207444 | -2.276640 |
| H | 5.851289  | -0.002427 | -1.512129 |
| H | 5.450926  | -0.973415 | -2.967237 |



|   |          |           |           |
|---|----------|-----------|-----------|
| H | 4.861557 | 0.712241  | -2.807196 |
| H | 3.681734 | -5.432867 | 0.682685  |
| H | 2.238972 | 0.117155  | -2.724669 |

**13**

| Symbol | X         | Y         | Z         |
|--------|-----------|-----------|-----------|
| H      | -0.248588 | 0.018127  | -1.508872 |
| F      | -3.295457 | -2.658558 | 2.829236  |
| F      | 3.070484  | -0.790714 | 3.010256  |
| F      | -2.005492 | -0.404176 | 2.136301  |
| C      | -2.656569 | -2.585322 | 1.661888  |
| C      | 3.111100  | 1.243816  | 1.836784  |
| C      | 2.492607  | 0.051143  | 2.149591  |
| C      | -1.995538 | -1.433432 | 1.277668  |
| C      | -2.644040 | -3.686171 | 0.818044  |
| F      | 3.147686  | 3.208290  | 0.547706  |
| C      | 2.538445  | 2.071648  | 0.885558  |
| F      | 0.824819  | -1.512660 | 1.832360  |
| C      | 1.314350  | -0.302190 | 1.504106  |
| C      | 1.367493  | 1.677905  | 0.267347  |
| C      | 0.702740  | 0.485714  | 0.540778  |
| C      | -1.311696 | -1.307365 | 0.076000  |
| C      | -1.969559 | -3.613367 | -0.385986 |
| F      | 0.885208  | 2.498386  | -0.677954 |
| C      | -1.326258 | -2.432247 | -0.725891 |
| B      | -0.613145 | 0.101958  | -0.347811 |
| F      | -1.937160 | -4.671127 | -1.198090 |
| F      | -0.664588 | -2.435333 | -1.907386 |
| C      | -1.773019 | 1.248086  | -0.352776 |
| F      | -1.100666 | 2.381775  | 1.618959  |
| F      | -2.662421 | 0.263869  | -2.307939 |
| C      | -1.943410 | 2.256990  | 0.583264  |
| C      | -2.725556 | 1.216644  | -1.363198 |
| C      | -2.971071 | 3.186521  | 0.519005  |
| C      | -3.767797 | 2.122378  | -1.465076 |
| F      | -3.086697 | 4.141944  | 1.443666  |
| F      | -4.651724 | 2.046067  | -2.462319 |
| C      | -3.889366 | 3.119248  | -0.512767 |
| F      | -3.270085 | -4.806458 | 1.170727  |
| F      | -4.883388 | 4.002753  | -0.587879 |
| F      | 4.275256  | 1.568163  | 2.393342  |
| H      | 1.152319  | -0.929521 | -1.535792 |
| H      | 2.878332  | -3.180965 | -2.195375 |
| H      | 4.210439  | -3.020655 | -0.246667 |

|   |          |           |           |
|---|----------|-----------|-----------|
| C | 3.932257 | -0.919355 | -0.718473 |
| C | 3.118875 | -0.368331 | -1.691883 |
| C | 3.322852 | 0.877260  | -2.257026 |
| C | 4.424280 | 1.596725  | -1.800732 |
| C | 5.265234 | 1.067859  | -0.821241 |
| C | 5.028485 | -0.190385 | -0.273245 |
| C | 3.420696 | -2.271693 | -0.292623 |
| C | 2.409472 | -2.610467 | -1.394405 |
| H | 2.658820 | 1.286405  | -3.007876 |
| H | 4.621630 | 2.579957  | -2.207401 |
| H | 5.680295 | -0.591224 | 0.493975  |
| H | 2.946885 | -2.224668 | 0.690112  |
| N | 2.005420 | -1.282739 | -2.006964 |
| C | 1.675691 | -1.380987 | -3.457754 |
| H | 1.252886 | -0.433565 | -3.784818 |
| H | 2.593211 | -1.602848 | -3.998820 |
| H | 0.943133 | -2.173371 | -3.585449 |
| H | 6.111729 | 1.648850  | -0.477185 |
| H | 1.510525 | -3.120860 | -1.058650 |

**14**

| Symbol | X         | Y         | Z         |
|--------|-----------|-----------|-----------|
| H      | 0.973924  | -0.926818 | -2.666436 |
| F      | 0.812696  | 3.773365  | 3.195620  |
| F      | -3.313695 | -1.305515 | 2.449218  |
| F      | 1.095679  | 1.136546  | 2.673736  |
| C      | 0.713708  | 3.324413  | 1.949014  |
| C      | -2.385717 | -2.865873 | 0.962773  |
| C      | -2.370336 | -1.625897 | 1.573126  |
| C      | 0.859967  | 1.980223  | 1.661092  |
| C      | 0.457251  | 4.207542  | 0.911788  |
| F      | -1.428296 | -4.387704 | -0.547836 |
| C      | -1.387148 | -3.208324 | 0.063167  |
| F      | -1.433753 | 0.456898  | 1.863583  |
| C      | -1.367885 | -0.726550 | 1.254872  |
| C      | -0.368438 | -2.313094 | -0.185036 |
| C      | -0.306209 | -1.043570 | 0.401370  |
| C      | 0.751439  | 1.467816  | 0.377672  |
| C      | 0.366894  | 3.735460  | -0.386371 |
| F      | 0.584913  | -2.709157 | -1.030904 |
| C      | 0.521432  | 2.380996  | -0.636035 |
| B      | 0.910277  | -0.097182 | 0.185160  |
| F      | 0.124723  | 4.581435  | -1.385062 |
| F      | 0.451256  | 1.982230  | -1.908457 |

C 2.354681 -0.657425 -0.050178  
 F 1.985726 -2.557710 1.318507  
 F 2.964534 1.157537 -1.438642  
 C 2.802949 -1.833041 0.554953  
 C 3.301887 0.036163 -0.804014  
 C 4.099280 -2.295113 0.423211  
 C 4.600355 -0.408680 -0.972273  
 F 4.488943 -3.411698 1.026863  
 F 5.462223 0.270683 -1.719709  
 C 5.000237 -1.578744 -0.348092  
 F 0.309602 5.501574 1.161148  
 F 6.240747 -2.013280 -0.489911  
 F -3.357526 -3.722235 1.223364  
 H 0.941407 -0.192859 -2.774867  
 H -3.398686 2.588762 -2.468511  
 H -3.995974 2.876475 -0.135629  
 C -3.822753 0.714067 -0.444352  
 C -3.154697 0.046507 -1.486979  
 C -3.483657 -1.260919 -1.825759  
 C -4.488502 -1.897353 -1.089047  
 C -5.145894 -1.248072 -0.051182  
 C -4.811214 0.074146 0.274158  
 C -3.252285 2.111102 -0.353808  
 C -2.632785 2.257658 -1.749827  
 H -2.990997 -1.775579 -2.641971  
 H -4.758194 -2.917683 -1.338362  
 H -5.326634 0.587820 1.078092  
 H -2.471869 2.151371 0.415244  
 N -2.208886 0.887629 -2.076566  
 C -1.851934 0.650716 -3.461369  
 H -1.431414 -0.348335 -3.575035  
 H -2.721216 0.749006 -4.128184  
 H -1.090586 1.371866 -3.758501  
 H -5.919603 -1.762628 0.504954  
 H -1.793036 2.949460 -1.801537

**15**

| Symbol | X         | Y         | Z         |
|--------|-----------|-----------|-----------|
| H      | -1.007525 | 0.106582  | 1.398992  |
| F      | -4.424947 | 2.538128  | -2.821332 |
| F      | 0.883839  | -0.768715 | -3.936659 |
| F      | -3.304140 | 0.258549  | -1.947969 |
| C      | -3.656379 | 2.544447  | -1.731794 |
| C      | 0.961119  | -2.473109 | -2.321752 |

C 0.508569 -1.241206 -2.746395  
 C -3.068587 1.385260 -1.261041  
 C -3.438556 3.735018 -1.054233  
 F 1.065019 -4.096012 -0.623290  
 C 0.591992 -2.929471 -1.067237  
 F -0.613741 0.741358 -2.381987  
 C -0.300200 -0.482850 -1.909605  
 C -0.229300 -2.145273 -0.280377  
 C -0.721919 -0.899064 -0.657164  
 C -2.247629 1.334745 -0.140826  
 C -2.642997 3.736024 0.075227  
 F -0.535040 -2.632579 0.935602  
 C -2.078800 2.543736 0.509115  
 B -1.666628 -0.090341 0.404017  
 F -2.412595 4.877487 0.728208  
 F -1.303777 2.636489 1.611977  
 C -2.975657 -0.953598 0.875849  
 F -3.013486 -2.514199 -0.914154  
 F -3.190556 0.509022 2.719314  
 C -3.543092 -2.038131 0.223592  
 C -3.640443 -0.551731 2.028166  
 C -4.672720 -2.698635 0.686293  
 C -4.769778 -1.179372 2.525178  
 F -5.173033 -3.743263 0.022279  
 F -5.362411 -0.750019 3.642012  
 C -5.290034 -2.267435 1.845677  
 F -3.989587 4.865442 -1.490963  
 F -6.376418 -2.889314 2.302613  
 F 1.784096 -3.190778 -3.083614  
 H 1.380901 -0.936802 1.553895  
 C 2.689165 -0.299036 -0.107703  
 C 2.370297 0.816184 -0.878559  
 C 2.816142 1.018076 -2.171933  
 C 3.624858 0.014975 -2.701036  
 C 3.957275 -1.115192 -1.952270  
 C 3.497859 -1.284865 -0.646999  
 C 2.046996 -0.128655 1.237505  
 C 1.308787 1.143781 1.070120  
 H 2.537577 1.888392 -2.752392  
 H 3.991984 0.111771 -3.714610  
 H 3.768190 -2.162253 -0.072255  
 H 2.808273 0.006537 2.030882  
 N 1.519991 1.659386 -0.098089  
 C 0.991112 2.928553 -0.596801

|   |          |           |           |
|---|----------|-----------|-----------|
| H | 1.824418 | 3.532088  | -0.954648 |
| H | 0.298020 | 2.716206  | -1.411054 |
| H | 0.482042 | 3.435740  | 0.218034  |
| H | 4.587805 | -1.876353 | -2.394216 |
| H | 0.683417 | 1.646715  | 1.794429  |
| H | 5.629829 | 2.337948  | 3.412586  |
| H | 5.452571 | 3.197929  | 1.179974  |
| C | 5.660055 | 1.043627  | 0.858101  |
| C | 5.546836 | 0.035279  | 1.826044  |
| C | 6.137368 | -1.208550 | 1.638075  |
| C | 6.829681 | -1.431292 | 0.444315  |
| C | 6.932477 | -0.441893 | -0.526522 |
| C | 6.341968 | 0.810065  | -0.319002 |
| C | 4.920585 | 2.263444  | 1.355546  |
| C | 4.768457 | 1.945577  | 2.853095  |
| H | 6.073143 | -1.985052 | 2.390563  |
| H | 7.300846 | -2.393574 | 0.280529  |
| H | 6.424911 | 1.587918  | -1.070443 |
| H | 3.942338 | 2.341862  | 0.867790  |
| N | 4.769449 | 0.474223  | 2.907822  |
| C | 4.999972 | -0.114987 | 4.213978  |
| H | 4.803005 | -1.187101 | 4.182393  |
| H | 6.030495 | 0.047908  | 4.559217  |
| H | 4.311878 | 0.332955  | 4.931405  |
| H | 7.476948 | -0.637593 | -1.442218 |
| H | 3.854110 | 2.343560  | 3.296844  |

**16**

| Symbol | X         | Y         | Z         |
|--------|-----------|-----------|-----------|
| H      | -1.299581 | 0.187735  | 1.500306  |
| F      | -4.432614 | 2.829034  | -2.795335 |
| F      | 0.705383  | -1.093871 | -3.780535 |
| F      | -3.620442 | 0.458616  | -1.839337 |
| C      | -3.613892 | 2.776867  | -1.742165 |
| C      | 0.865621  | -2.564023 | -1.956336 |
| C      | 0.348191  | -1.422067 | -2.534501 |
| C      | -3.185145 | 1.567827  | -1.224639 |
| C      | -3.177074 | 3.954989  | -1.156972 |
| F      | 1.058124  | -3.939248 | -0.058466 |
| C      | 0.530613  | -2.862044 | -0.648101 |
| F      | -0.943854 | 0.490583  | -2.456084 |
| C      | -0.505814 | -0.607665 | -1.804505 |
| C      | -0.320552 | -2.018303 | 0.042855  |
| C      | -0.882575 | -0.865443 | -0.495160 |

|   |           |           |           |
|---|-----------|-----------|-----------|
| C | -2.324335 | 1.454320  | -0.140384 |
| C | -2.326830 | 3.896372  | -0.069312 |
| F | -0.603507 | -2.369634 | 1.309264  |
| C | -1.932206 | 2.658330  | 0.418747  |
| B | -1.881272 | 0.003764  | 0.462408  |
| F | -1.889125 | 5.026355  | 0.495220  |
| F | -1.098263 | 2.691635  | 1.478290  |
| C | -3.247912 | -0.825287 | 0.823341  |
| F | -3.200609 | -2.317369 | -1.024647 |
| F | -3.561133 | 0.573184  | 2.705203  |
| C | -3.788527 | -1.878417 | 0.099394  |
| C | -3.978208 | -0.453599 | 1.945326  |
| C | -4.953148 | -2.537652 | 0.466815  |
| C | -5.145522 | -1.081077 | 2.347667  |
| F | -5.426987 | -3.550237 | -0.265049 |
| F | -5.802570 | -0.682381 | 3.441024  |
| C | -5.636101 | -2.137394 | 1.600157  |
| F | -3.570448 | 5.132329  | -1.642403 |
| F | -6.758035 | -2.758460 | 1.966614  |
| F | 1.696575  | -3.351348 | -2.640756 |
| H | 2.005204  | -0.981921 | 2.627603  |
| C | 2.780333  | -0.855416 | 0.505808  |
| C | 2.540967  | 0.143121  | -0.466171 |
| C | 3.046649  | 0.059451  | -1.770415 |
| C | 3.821277  | -1.041296 | -2.076903 |
| C | 4.087887  | -2.041533 | -1.116962 |
| C | 3.575722  | -1.962959 | 0.161169  |
| C | 2.093460  | -0.440228 | 1.698744  |
| C | 1.480883  | 0.755412  | 1.402894  |
| H | 2.816396  | 0.811910  | -2.516294 |
| H | 4.217265  | -1.150322 | -3.079229 |
| H | 3.773202  | -2.743284 | 0.886957  |
| H | 3.756562  | 0.836236  | 1.892622  |
| N | 1.767226  | 1.124701  | 0.113461  |
| C | 1.229726  | 2.279162  | -0.587044 |
| H | 2.019897  | 2.763184  | -1.164370 |
| H | 0.423044  | 1.978404  | -1.259425 |
| H | 0.843301  | 2.984294  | 0.145835  |
| H | 4.694031  | -2.893381 | -1.399956 |
| H | 0.831161  | 1.371843  | 2.005269  |
| H | 5.411400  | 3.243084  | 1.841318  |
| H | 5.891878  | 3.051260  | -0.476499 |
| C | 6.021060  | 0.977349  | 0.161839  |
| C | 5.701777  | 0.452573  | 1.400904  |

|   |          |           |           |
|---|----------|-----------|-----------|
| C | 6.235462 | -0.715488 | 1.908962  |
| C | 7.150234 | -1.385297 | 1.100800  |
| C | 7.489291 | -0.885952 | -0.155825 |
| C | 6.929823 | 0.295400  | -0.636084 |
| C | 5.258570 | 2.252319  | -0.092604 |
| C | 4.717508 | 2.600766  | 1.299058  |
| H | 5.959564 | -1.102914 | 2.881610  |
| H | 7.599504 | -2.304079 | 1.455380  |
| H | 7.198458 | 0.677686  | -1.613366 |
| H | 4.453277 | 2.077122  | -0.808177 |
| N | 4.678747 | 1.288821  | 2.053272  |
| C | 4.820785 | 1.449065  | 3.525287  |
| H | 4.661449 | 0.484357  | 4.001529  |
| H | 5.820742 | 1.822138  | 3.736357  |
| H | 4.064529 | 2.154777  | 3.862979  |
| H | 8.202331 | -1.425181 | -0.767024 |
| H | 3.720499 | 3.037807  | 1.316267  |

**17**

| Symbol | X         | Y         | Z         |
|--------|-----------|-----------|-----------|
| H      | -0.786979 | 0.405736  | 1.196183  |
| F      | -3.950992 | 2.158293  | -3.516120 |
| F      | 0.698790  | -2.410765 | -3.569403 |
| F      | -3.312102 | 0.059464  | -1.969228 |
| C      | -3.074696 | 2.302243  | -2.521558 |
| C      | 0.702636  | -3.423900 | -1.453618 |
| C      | 0.327269  | -2.390167 | -2.288112 |
| C      | -2.733957 | 1.238675  | -1.706399 |
| C      | -2.487695 | 3.539045  | -2.300549 |
| F      | 0.751481  | -4.329692 | 0.715257  |
| C      | 0.357671  | -3.363126 | -0.114688 |
| F      | -0.667961 | -0.341424 | -2.667009 |
| C      | -0.384577 | -1.313624 | -1.776015 |
| C      | -0.351784 | -2.270426 | 0.349016  |
| C      | -0.750071 | -1.198192 | -0.443251 |
| C      | -1.818118 | 1.327934  | -0.664804 |
| C      | -1.576700 | 3.683073  | -1.271949 |
| F      | -0.633754 | -2.260165 | 1.665899  |
| C      | -1.275705 | 2.586352  | -0.476530 |
| B      | -1.510718 | 0.046021  | 0.296154  |
| F      | -0.993606 | 4.864484  | -1.056800 |
| F      | -0.372229 | 2.814073  | 0.505454  |
| C      | -2.924577 | -0.401538 | 0.985407  |
| F      | -3.292591 | -2.362738 | -0.301121 |

|   |           |           |           |
|---|-----------|-----------|-----------|
| F | -2.814990 | 1.523468  | 2.352544  |
| C | -3.686802 | -1.514085 | 0.660314  |
| C | -3.461634 | 0.406756  | 1.979528  |
| C | -4.885962 | -1.823584 | 1.286476  |
| C | -4.654111 | 0.137169  | 2.629416  |
| F | -5.578635 | -2.910588 | 0.938683  |
| F | -5.119598 | 0.948116  | 3.582663  |
| C | -5.372358 | -0.992776 | 2.278688  |
| F | -2.797033 | 4.575116  | -3.077045 |
| F | -6.523214 | -1.274279 | 2.889095  |
| F | 1.414217  | -4.446619 | -1.922757 |
| H | 1.341211  | -1.039368 | 2.079355  |
| C | 2.860689  | -1.378503 | 0.539541  |
| C | 2.758715  | -0.679047 | -0.657544 |
| C | 3.252273  | -1.138222 | -1.866264 |
| C | 3.881571  | -2.378071 | -1.839184 |
| C | 4.002063  | -3.100480 | -0.648067 |
| C | 3.495489  | -2.611245 | 0.553735  |
| C | 2.208057  | -0.557455 | 1.611569  |
| C | 1.773103  | 0.642662  | 0.858004  |
| H | 3.146048  | -0.575601 | -2.785676 |
| H | 4.277719  | -2.791945 | -2.757546 |
| H | 3.586205  | -3.182177 | 1.469409  |
| H | 2.893653  | -0.268842 | 2.420359  |
| N | 2.078533  | 0.548543  | -0.394332 |
| C | 1.775633  | 1.524562  | -1.439775 |
| H | 2.680196  | 1.700345  | -2.018712 |
| H | 0.986939  | 1.118825  | -2.075223 |
| H | 1.446475  | 2.447595  | -0.970090 |
| H | 4.493880  | -4.065001 | -0.663898 |
| H | 1.250009  | 1.505676  | 1.244166  |
| C | 5.324428  | 0.692696  | 1.744877  |
| C | 4.649999  | 1.865135  | 1.325613  |
| C | 4.691823  | 2.320993  | 0.002633  |
| C | 5.396377  | 1.555101  | -0.908885 |
| C | 6.053224  | 0.369157  | -0.519301 |
| C | 6.026895  | -0.064636 | 0.791596  |
| C | 5.086805  | 0.564916  | 3.154046  |
| C | 4.299633  | 1.624737  | 3.517542  |
| H | 4.195183  | 3.237998  | -0.294677 |
| H | 5.451042  | 1.875837  | -1.942992 |
| H | 6.536907  | -0.975521 | 1.083467  |
| H | 5.448692  | -0.210967 | 3.809949  |
| N | 4.011281  | 2.403179  | 2.420539  |

|   |          |           |           |
|---|----------|-----------|-----------|
| C | 3.317243 | 3.678848  | 2.436953  |
| H | 4.019365 | 4.502472  | 2.294632  |
| H | 2.562569 | 3.715396  | 1.648594  |
| H | 2.819323 | 3.793218  | 3.397656  |
| H | 6.586220 | -0.207315 | -1.265688 |
| H | 3.903088 | 1.894920  | 4.484735  |

**18**

| Symbol | X         | Y         | Z         |
|--------|-----------|-----------|-----------|
| H      | 0.855929  | 0.115552  | -1.418791 |
| F      | 2.138282  | 2.586256  | 3.836382  |
| F      | -1.323992 | -2.790121 | 2.909500  |
| F      | 2.399308  | 0.377593  | 2.331256  |
| C      | 1.594553  | 2.536756  | 2.618778  |
| C      | -0.383895 | -3.889675 | 1.052834  |
| C      | -0.557323 | -2.751344 | 1.812807  |
| C      | 1.716203  | 1.412549  | 1.822751  |
| C      | 0.893524  | 3.632691  | 2.138629  |
| F      | 0.528240  | -4.892643 | -0.868659 |
| C      | 0.378987  | -3.808591 | -0.100357 |
| F      | -0.244232 | -0.496180 | 2.197105  |
| C      | 0.032648  | -1.558927 | 1.413230  |
| C      | 0.951342  | -2.600627 | -0.453986 |
| C      | 0.807536  | -1.424130 | 0.273763  |
| C      | 1.158133  | 1.296906  | 0.555663  |
| C      | 0.334335  | 3.575807  | 0.876849  |
| F      | 1.663672  | -2.588093 | -1.595297 |
| C      | 0.482471  | 2.422409  | 0.118298  |
| B      | 1.406695  | -0.039252 | -0.354962 |
| F      | -0.333653 | 4.632943  | 0.397329  |
| F      | -0.102461 | 2.455604  | -1.100195 |
| C      | 3.018653  | -0.100079 | -0.638225 |
| F      | 3.532728  | -1.918755 | 0.800256  |
| F      | 2.782789  | 1.754808  | -2.085536 |
| C      | 3.929767  | -0.979668 | -0.072092 |
| C      | 3.572692  | 0.835953  | -1.502594 |
| C      | 5.288243  | -0.956651 | -0.355906 |
| C      | 4.920469  | 0.897014  | -1.813499 |
| F      | 6.120539  | -1.832882 | 0.213293  |
| F      | 5.393506  | 1.817988  | -2.658335 |
| C      | 5.787734  | -0.012339 | -1.233264 |
| F      | 0.764309  | 4.728858  | 2.884905  |
| F      | 7.090686  | 0.025223  | -1.515118 |
| F      | -0.950261 | -5.043120 | 1.408571  |

|   |           |           |           |
|---|-----------|-----------|-----------|
| H | -1.307960 | -0.917247 | -2.336226 |
| C | -2.600100 | -2.212856 | -1.016716 |
| C | -3.151859 | -1.916991 | 0.253959  |
| C | -3.828635 | -2.873703 | 1.019056  |
| C | -3.933965 | -4.145877 | 0.489701  |
| C | -3.387991 | -4.464872 | -0.770980 |
| C | -2.730727 | -3.514865 | -1.528115 |
| C | -1.919348 | -1.030212 | -1.453349 |
| C | -2.061292 | -0.105683 | -0.452165 |
| H | -4.224650 | -2.635291 | 1.998996  |
| H | -4.430605 | -4.919942 | 1.061873  |
| H | -2.294525 | -3.774449 | -2.486209 |
| H | -4.822151 | -0.321997 | -1.194088 |
| N | -2.820410 | -0.618858 | 0.568268  |
| C | -3.133394 | 0.038926  | 1.822733  |
| H | -4.214776 | 0.118885  | 1.952075  |
| H | -2.704220 | -0.521052 | 2.655170  |
| H | -2.700783 | 1.038782  | 1.806322  |
| H | -3.476047 | -5.479157 | -1.140832 |
| H | -1.632722 | 0.881594  | -0.366797 |
| C | -4.614532 | 1.831905  | -0.915658 |
| C | -3.552733 | 2.486461  | -1.535127 |
| C | -2.920446 | 3.599707  | -1.013016 |
| C | -3.424816 | 4.079053  | 0.194327  |
| C | -4.511627 | 3.464395  | 0.817871  |
| C | -5.119130 | 2.333396  | 0.272118  |
| C | -4.957142 | 0.623515  | -1.737038 |
| C | -3.962873 | 0.712362  | -2.836158 |
| H | -2.068113 | 4.062568  | -1.492749 |
| H | -2.957463 | 4.939903  | 0.654289  |
| H | -5.951489 | 1.853956  | 0.772554  |
| H | -5.975316 | 0.624461  | -2.140120 |
| N | -3.222861 | 1.765003  | -2.722807 |
| C | -2.083110 | 2.112195  | -3.568834 |
| H | -2.162158 | 3.159752  | -3.853728 |
| H | -1.173761 | 1.948208  | -2.989237 |
| H | -2.094094 | 1.478209  | -4.451095 |
| H | -4.882553 | 3.868021  | 1.751645  |
| H | -3.842366 | 0.025708  | -3.663305 |

**19**

| Symbol | X        | Y         | Z         |
|--------|----------|-----------|-----------|
| H      | 0.518459 | -0.093996 | -1.768990 |
| F      | 3.009038 | 3.027839  | 2.596305  |

F -2.936251 -0.004682 2.923036  
 F 1.965773 0.640839 1.967419  
 C 2.422585 2.846415 1.412517  
 C -2.934697 -1.750196 1.349211  
 C -2.358258 -0.610123 1.877151  
 C 1.881227 1.623298 1.060351  
 C 2.350008 3.902341 0.517009  
 F -2.934652 -3.408994 -0.315327  
 C -2.367826 -2.332969 0.231376  
 F -0.790657 1.086489 1.818270  
 C -1.231942 -0.066566 1.278000  
 C -1.231395 -1.766574 -0.322096  
 C -0.610146 -0.623376 0.169156  
 C 1.258414 1.378852 -0.157644  
 C 1.731805 3.714573 -0.704578  
 F -0.741250 -2.372449 -1.413369  
 C 1.207439 2.466751 -1.013368  
 B 0.747028 -0.110519 -0.585572  
 F 1.639342 4.728917 -1.567558  
 F 0.601405 2.369079 -2.216148  
 C 1.978840 -1.165201 -0.380616  
 F 1.211099 -2.138446 1.644049  
 F 2.984072 -0.319282 -2.345950  
 C 2.121209 -2.071815 0.659737  
 C 3.008060 -1.177400 -1.313275  
 C 3.189944 -2.950470 0.762554  
 C 4.093501 -2.035257 -1.249186  
 F 3.274518 -3.808019 1.782847  
 F 5.050258 -2.007352 -2.180102  
 C 4.182294 -2.933770 -0.200117  
 F 2.863243 5.088471 0.836008  
 F 5.216066 -3.770657 -0.116249  
 F -4.050549 -2.244652 1.879767  
 H -1.220810 0.618464 -2.246672  
 C -3.348021 0.312772 -1.828176  
 C -3.890806 0.835877 -0.659006  
 C -4.985352 0.298489 -0.004087  
 C -5.537354 -0.843925 -0.576037  
 C -5.004240 -1.397580 -1.743022  
 C -3.908150 -0.825919 -2.385591  
 C -2.174490 1.161135 -2.214915  
 C -2.141339 2.158915 -1.120100  
 H -5.379592 0.722019 0.911608  
 H -6.385693 -1.316952 -0.098769

H -3.495723 -1.267832 -3.283959  
 H -2.283151 1.665098 -3.182202  
 N -3.100033 1.964818 -0.276615  
 C -3.353537 2.730031 0.943311  
 H -4.360529 3.141428 0.892480  
 H -3.264957 2.057828 1.796759  
 H -2.618082 3.526300 1.017422  
 H -5.449623 -2.295592 -2.151956  
 H -1.434914 2.968355 -0.989924

**20**

| Symbol | X         | Y         | Z         |
|--------|-----------|-----------|-----------|
| H      | 0.646908  | -0.244972 | -1.793755 |
| F      | 2.849796  | 3.034655  | 2.774555  |
| F      | -3.147160 | 0.525830  | 2.884226  |
| F      | 1.689166  | 0.671808  | 2.170570  |
| C      | 2.396286  | 2.806038  | 1.546575  |
| C      | -3.125208 | -1.402009 | 1.545891  |
| C      | -2.543152 | -0.217253 | 1.955333  |
| C      | 1.798613  | 1.605180  | 1.217175  |
| C      | 2.519155  | 3.784233  | 0.570992  |
| F      | -3.102598 | -3.273276 | 0.125087  |
| C      | -2.532023 | -2.148524 | 0.542164  |
| F      | -0.906851 | 1.406898  | 1.758450  |
| C      | -1.375152 | 0.221855  | 1.352242  |
| C      | -1.356285 | -1.690990 | -0.018434 |
| C      | -0.727179 | -0.511691 | 0.367605  |
| C      | 1.298216  | 1.328990  | -0.047387 |
| C      | 2.049876  | 3.543582  | -0.707650 |
| F      | -0.813079 | -2.425662 | -0.997480 |
| C      | 1.457130  | 2.323674  | -0.997212 |
| B      | 0.685034  | -0.132252 | -0.279880 |
| F      | 2.168637  | 4.478252  | -1.646112 |
| F      | 1.034636  | 2.138890  | -2.256852 |
| C      | 1.823564  | -1.270112 | -0.264592 |
| F      | 0.996184  | -2.375837 | 1.660814  |
| F      | 2.819420  | -0.289390 | -2.154041 |
| C      | 1.914729  | -2.265579 | 0.699006  |
| C      | 2.852532  | -1.230228 | -1.196252 |
| C      | 2.961238  | -3.175043 | 0.726171  |
| C      | 3.905688  | -2.124315 | -1.209771 |
| F      | 3.017268  | -4.111976 | 1.666988  |
| F      | 4.856286  | -2.053703 | -2.134937 |
| C      | 3.956875  | -3.105635 | -0.233161 |

F 3.088001 4.946345 0.864585  
 F 4.956482 -3.975934 -0.217408  
 F -4.271537 -1.797024 2.080779  
 H -0.047584 0.072696 -1.626872  
 C -2.994580 0.291404 -2.111792  
 C -3.653630 0.872721 -1.002007  
 C -4.790811 0.304362 -0.419490  
 C -5.249859 -0.885377 -0.955238  
 C -4.596315 -1.495621 -2.044764  
 C -3.481514 -0.921353 -2.627378  
 C -1.897636 1.159524 -2.435070  
 C -1.930395 2.186627 -1.524969  
 H -5.284955 0.769988 0.426537  
 H -6.121328 -1.362168 -0.523353  
 H -2.989141 -1.398164 -3.467216  
 H -1.214837 1.075851 -3.266497  
 N -2.978380 2.020119 -0.658787  
 C -3.357517 2.920327 0.413890  
 H -4.325740 3.379253 0.204688  
 H -3.413362 2.380275 1.360453  
 H -2.601615 3.698371 0.500556  
 H -4.978145 -2.433692 -2.429075  
 H -1.294445 3.055385 -1.438852

**TS<sub>2/3</sub>**

| Symbol | X         | Y         | Z         |
|--------|-----------|-----------|-----------|
| Si     | 1.116841  | 0.466843  | -1.442392 |
| H      | -0.324114 | 0.104175  | -0.525631 |
| H      | 0.989964  | 1.876130  | -1.045349 |
| F      | -5.937378 | -0.499480 | -1.743976 |
| F      | -0.592655 | -4.421286 | 2.629810  |
| F      | -4.262897 | 0.610905  | -0.011820 |
| C      | -4.669504 | -0.907821 | -1.707652 |
| C      | 0.750284  | -2.587139 | 3.219902  |
| C      | -0.286711 | -3.130535 | 2.487740  |
| C      | -3.768745 | -0.339282 | -0.817202 |
| C      | -4.247992 | -1.909508 | -2.561403 |
| F      | 2.054276  | -0.712200 | 3.775937  |
| C      | 1.056196  | -1.244674 | 3.071570  |
| F      | -1.987406 | -2.939467 | 0.934953  |
| C      | -0.996604 | -2.330496 | 1.601918  |
| C      | 0.332526  | -0.488394 | 2.171408  |
| C      | -0.709173 | -0.988966 | 1.396225  |
| C      | -2.438047 | -0.725028 | -0.737513 |

C -2.931489 -2.336773 -2.509932  
 F 0.698831 0.796361 2.033116  
 C -2.071296 -1.742734 -1.606984  
 B -1.342994 -0.051089 0.245154  
 F -2.515703 -3.311241 -3.318840  
 F -0.812272 -2.215117 -1.571869  
 C -1.716458 1.467157 0.648339  
 F -1.974645 1.075045 2.969139  
 F -1.577964 2.072354 -1.629925  
 C -1.998371 1.918118 1.928131  
 C -1.801205 2.427031 -0.350259  
 C -2.323216 3.236218 2.208601  
 C -2.117084 3.753433 -0.116434  
 F -2.581606 3.623409 3.457416  
 F -2.175471 4.633704 -1.115777  
 C -2.381835 4.159945 1.180044  
 F -5.098883 -2.465870 -3.418277  
 F -2.691771 5.428312 1.434549  
 F 1.457697 -3.344701 4.054202  
 H 0.373412 -0.074537 -2.588871  
 C 2.177641 -0.631421 -0.377800  
 C 3.088923 -0.063219 0.521669  
 C 2.048210 -2.027404 -0.413566  
 C 3.854968 -0.868911 1.359664  
 H 3.199623 1.015741 0.582567  
 C 2.799267 -2.830258 0.438155  
 H 1.345783 -2.491107 -1.095479  
 C 3.704169 -2.251278 1.325709  
 H 4.552870 -0.413146 2.051835  
 H 2.674203 -3.906598 0.413503  
 H 4.282827 -2.877062 1.995350  
 C 4.755217 0.890746 -1.866592  
 C 5.834717 1.122130 -1.014607  
 C 3.758174 1.850135 -2.113829  
 C 5.897116 2.364492 -0.409899  
 H 6.580035 0.359716 -0.822945  
 C 3.843654 3.101051 -1.490380  
 C 4.913033 3.343096 -0.646132  
 H 6.716768 2.589167 0.261239  
 H 3.085305 3.856406 -1.659261  
 H 4.997940 4.303864 -0.153326  
 C 2.766192 1.208734 -2.954602  
 C 3.271554 -0.067673 -3.221148  
 H 2.030718 1.710660 -3.567937

|   |          |           |           |
|---|----------|-----------|-----------|
| N | 4.419554 | -0.266844 | -2.558052 |
| C | 5.101480 | -1.540191 | -2.382155 |
| H | 6.164642 | -1.415688 | -2.585827 |
| H | 4.955756 | -1.891633 | -1.357277 |
| H | 4.681617 | -2.261826 | -3.079467 |
| H | 2.842071 | -0.856750 | -3.822690 |

**TS<sub>4/5</sub>**

| Symbol | X         | Y         | Z         |
|--------|-----------|-----------|-----------|
| Si     | -3.307944 | -2.419349 | -1.197257 |
| H      | 0.448735  | 0.659384  | 0.105989  |
| H      | -4.627205 | -3.084217 | -1.088095 |
| F      | 5.279784  | 2.408001  | -2.689138 |
| F      | 4.757030  | 0.590368  | 4.047629  |
| F      | 4.162302  | 0.287699  | -1.535545 |
| C      | 4.170885  | 2.560839  | -1.963469 |
| C      | 2.591927  | -0.238273 | 4.422600  |
| C      | 3.554437  | 0.269951  | 3.566933  |
| C      | 3.562040  | 1.472148  | -1.357838 |
| C      | 3.624060  | 3.823561  | -1.811146 |
| F      | 0.411096  | -1.079071 | 4.721726  |
| C      | 1.353150  | -0.584665 | 3.914829  |
| F      | 4.252386  | 0.903646  | 1.453791  |
| C      | 3.259721  | 0.433326  | 2.222001  |
| C      | 1.108559  | -0.405974 | 2.563623  |
| C      | 2.026638  | 0.119051  | 1.667514  |
| C      | 2.408192  | 1.569373  | -0.592381 |
| C      | 2.481030  | 3.975769  | -1.047985 |
| F      | -0.112580 | -0.783622 | 2.131094  |
| C      | 1.916010  | 2.860044  | -0.452585 |
| B      | 1.606627  | 0.326805  | 0.103475  |
| F      | 1.928036  | 5.182813  | -0.903963 |
| F      | 0.795006  | 3.084272  | 0.264442  |
| C      | 1.699788  | -1.072986 | -0.734235 |
| F      | 3.714280  | -1.759713 | 0.299259  |
| F      | -0.330390 | -0.643716 | -1.909643 |
| C      | 2.715683  | -2.006155 | -0.560175 |
| C      | 0.736032  | -1.443053 | -1.659897 |
| C      | 2.771980  | -3.212471 | -1.237361 |
| C      | 0.764819  | -2.623484 | -2.384463 |
| F      | 3.752559  | -4.087637 | -1.004494 |
| F      | -0.187636 | -2.902705 | -3.277430 |
| C      | 1.789745  | -3.521754 | -2.162350 |
| F      | 4.191185  | 4.878578  | -2.393046 |

|   |           |           |           |
|---|-----------|-----------|-----------|
| F | 1.823451  | -4.682205 | -2.813964 |
| F | 2.859431  | -0.398153 | 5.717528  |
| H | -3.075109 | -2.105256 | -2.629877 |
| C | -1.920474 | -3.518329 | -0.583685 |
| C | -1.185727 | -3.228327 | 0.569038  |
| C | -1.576350 | -4.660375 | -1.321891 |
| C | -0.115905 | -4.030402 | 0.959345  |
| H | -1.439986 | -2.368169 | 1.176374  |
| C | -0.523591 | -5.475964 | -0.925528 |
| H | -2.122979 | -4.909131 | -2.226775 |
| C | 0.216907  | -5.153715 | 0.210769  |
| H | 0.453158  | -3.773859 | 1.845982  |
| H | -0.265529 | -6.350325 | -1.511112 |
| H | 1.055030  | -5.775319 | 0.505451  |
| C | -4.092193 | 0.468356  | 1.592638  |
| C | -4.914400 | 1.090443  | 2.527498  |
| C | -4.572221 | -0.443677 | 0.636390  |
| C | -6.263085 | 0.775432  | 2.482326  |
| H | -4.521582 | 1.793938  | 3.251620  |
| C | -5.937606 | -0.740498 | 0.607461  |
| C | -6.768435 | -0.128722 | 1.533475  |
| H | -6.940807 | 1.233381  | 3.192333  |
| H | -6.338301 | -1.434030 | -0.122890 |
| H | -7.828544 | -0.351263 | 1.529490  |
| C | -3.446058 | -0.812881 | -0.227732 |
| C | -2.352149 | -0.111421 | 0.331011  |
| H | -3.698878 | 0.040778  | -1.396897 |
| N | -2.730094 | 0.643668  | 1.367890  |
| C | -1.865607 | 1.511018  | 2.160089  |
| H | -2.365118 | 2.467473  | 2.308359  |
| H | -1.656782 | 1.042776  | 3.123244  |
| H | -0.934930 | 1.670001  | 1.616605  |
| H | -1.317366 | -0.116661 | 0.017778  |
| C | -4.079213 | 2.116939  | -1.472134 |
| C | -2.773651 | 2.630995  | -1.425526 |
| C | -2.392091 | 3.663156  | -0.572764 |
| C | -3.388140 | 4.199135  | 0.229967  |
| C | -4.704900 | 3.712249  | 0.188849  |
| C | -5.061518 | 2.664582  | -0.645508 |
| C | -4.035966 | 0.965349  | -2.371865 |
| C | -2.742139 | 0.993511  | -2.942090 |
| H | -1.370012 | 4.019335  | -0.527019 |
| H | -3.142973 | 5.009555  | 0.905615  |
| H | -6.070428 | 2.268545  | -0.644560 |



|   |           |          |           |
|---|-----------|----------|-----------|
| H | -4.889379 | 0.513213 | -2.859515 |
| N | -1.994315 | 1.913532 | -2.340897 |
| C | -0.575193 | 2.162515 | -2.564051 |
| H | -0.422722 | 3.230690 | -2.722559 |
| H | -0.012890 | 1.822704 | -1.696289 |
| H | -0.255787 | 1.608622 | -3.443348 |
| H | -5.452094 | 4.155700 | 0.835624  |
| H | -2.311998 | 0.333926 | -3.682631 |

**TS<sub>7/8</sub>**

| Symbol | X         | Y         | Z         |
|--------|-----------|-----------|-----------|
| H      | 0.060343  | -0.069769 | 1.319645  |
| F      | 3.974338  | -2.394819 | -2.498230 |
| F      | -2.879485 | -3.130448 | -1.807467 |
| F      | 2.021752  | -0.567829 | -2.232000 |
| C      | 3.345113  | -2.256910 | -1.332642 |
| C      | -3.372875 | -0.834616 | -1.902999 |
| C      | -2.509543 | -1.867940 | -1.594933 |
| C      | 2.336876  | -1.322957 | -1.170930 |
| C      | 3.701207  | -3.057753 | -0.259868 |
| F      | -3.830141 | 1.468754  | -1.904469 |
| C      | -2.991534 | 0.469655  | -1.637204 |
| F      | -0.520281 | -2.644228 | -0.716356 |
| C      | -1.277167 | -1.578735 | -1.029649 |
| C      | -1.760073 | 0.712291  | -1.057559 |
| C      | -0.846842 | -0.289716 | -0.735745 |
| C      | 1.644971  | -1.144293 | 0.018745  |
| C      | 3.045549  | -2.909321 | 0.948961  |
| F      | -1.504925 | 1.989971  | -0.739581 |
| C      | 2.041202  | -1.960816 | 1.063076  |
| B      | 0.495333  | -0.008459 | 0.109204  |
| F      | 3.382948  | -3.675779 | 1.985686  |
| F      | 1.438644  | -1.873882 | 2.265447  |
| C      | 1.178656  | 1.451077  | 0.006063  |
| F      | 0.668868  | 1.801607  | -2.279135 |
| F      | 1.800797  | 1.313229  | 2.282393  |
| C      | 1.261149  | 2.211676  | -1.153194 |
| C      | 1.826782  | 1.981023  | 1.113187  |
| C      | 1.937438  | 3.419446  | -1.212253 |
| C      | 2.507002  | 3.186838  | 1.099907  |
| F      | 1.990118  | 4.116367  | -2.346281 |
| F      | 3.102570  | 3.653358  | 2.196695  |
| C      | 2.563747  | 3.909680  | -0.078795 |
| F      | 4.666983  | -3.962269 | -0.391748 |

|   |           |           |           |
|---|-----------|-----------|-----------|
| F | 3.209789  | 5.070764  | -0.121232 |
| F | -4.574174 | -1.088905 | -2.409078 |
| H | -0.878834 | 2.006000  | 1.805750  |
| C | -2.830522 | 1.013490  | 1.858829  |
| C | -2.981344 | -0.373302 | 1.831745  |
| C | -4.121720 | -0.998633 | 1.361667  |
| C | -5.148119 | -0.169025 | 0.901581  |
| C | -5.014934 | 1.215867  | 0.915326  |
| C | -3.849028 | 1.821908  | 1.394512  |
| C | -1.467984 | 1.325865  | 2.422282  |
| C | -0.853207 | -0.050503 | 2.528744  |
| H | -4.216382 | -2.077578 | 1.336176  |
| H | -6.055536 | -0.616006 | 0.514597  |
| H | -3.743685 | 2.899959  | 1.389116  |
| H | -1.532727 | 1.753199  | 3.428988  |
| N | -1.800559 | -0.968611 | 2.340016  |
| C | -1.616137 | -2.406174 | 2.459844  |
| H | -2.491880 | -2.838579 | 2.942855  |
| H | -1.483589 | -2.851439 | 1.470743  |
| H | -0.731573 | -2.599334 | 3.061079  |
| H | -5.820205 | 1.833075  | 0.537916  |
| H | -0.000858 | -0.288715 | 3.153018  |

**TS<sub>9/10</sub>**

| Symbol | X        | Y         | Z         |
|--------|----------|-----------|-----------|
| F      | 0.290909 | 5.314251  | -1.677210 |
| F      | 5.114840 | 0.789432  | -1.806804 |
| F      | 0.430437 | 2.676407  | -2.202893 |
| C      | 0.240660 | 4.431478  | -0.683028 |
| C      | 4.127705 | -1.321171 | -1.526175 |
| C      | 4.042625 | 0.056954  | -1.510645 |
| C      | 0.310145 | 3.073047  | -0.929986 |
| C      | 0.116126 | 4.872332  | 0.625168  |
| F      | 3.105814 | -3.406967 | -1.162624 |
| C      | 3.016941 | -2.079805 | -1.194842 |
| F      | 2.858575 | 2.005668  | -1.135536 |
| C      | 2.848890 | 0.668187  | -1.152069 |
| C      | 1.849921 | -1.433855 | -0.847969 |
| C      | 1.710735 | -0.051376 | -0.817206 |
| C      | 0.272382 | 2.116157  | 0.074139  |
| C      | 0.059878 | 3.952084  | 1.656209  |
| F      | 0.800576 | -2.198965 | -0.499329 |
| C      | 0.136150 | 2.599191  | 1.363423  |
| B      | 0.306363 | 0.564716  | -0.353856 |

|    |           |           |           |
|----|-----------|-----------|-----------|
| F  | -0.074862 | 4.370198  | 2.913266  |
| F  | 0.043471  | 1.751983  | 2.403782  |
| C  | -1.014570 | 0.136103  | -1.155971 |
| F  | 0.093362  | -0.890752 | -2.986798 |
| F  | -2.332658 | 1.088544  | 0.555330  |
| C  | -1.038302 | -0.515563 | -2.382098 |
| C  | -2.257779 | 0.493502  | -0.646977 |
| C  | -2.216484 | -0.812454 | -3.050216 |
| C  | -3.451439 | 0.243227  | -1.294888 |
| F  | -2.192429 | -1.463758 | -4.211252 |
| F  | -4.612620 | 0.618369  | -0.763318 |
| C  | -3.427808 | -0.433903 | -2.501725 |
| F  | 0.045838  | 6.172884  | 0.886331  |
| F  | -4.565643 | -0.736702 | -3.114321 |
| F  | 5.278408  | -1.920385 | -1.810125 |
| C  | -3.370706 | -1.523782 | 1.566871  |
| C  | -4.591420 | -1.729006 | 0.923981  |
| C  | -2.179458 | -2.168202 | 1.181195  |
| C  | -4.592849 | -2.596523 | -0.154428 |
| H  | -5.492225 | -1.216530 | 1.237970  |
| C  | -2.208407 | -3.037184 | 0.082314  |
| C  | -3.411854 | -3.236631 | -0.573522 |
| H  | -5.515508 | -2.777461 | -0.692119 |
| H  | -1.305148 | -3.533340 | -0.252140 |
| H  | -3.448542 | -3.900028 | -1.429567 |
| C  | -1.121473 | -1.716325 | 2.084505  |
| C  | -1.776547 | -0.834593 | 2.955152  |
| H  | -0.295779 | -0.539293 | 1.147709  |
| N  | -3.077920 | -0.705650 | 2.647514  |
| C  | -4.020214 | 0.232221  | 3.233965  |
| H  | -4.317685 | 0.964500  | 2.481407  |
| H  | -4.899435 | -0.302678 | 3.593378  |
| H  | -3.539921 | 0.739870  | 4.067164  |
| H  | -1.367771 | -0.283586 | 3.791325  |
| Si | 0.311486  | -2.811545 | 2.616101  |
| H  | 0.318427  | -0.003018 | 0.915434  |
| H  | 0.207398  | -4.077934 | 1.858361  |
| C  | 2.021756  | -2.098068 | 2.330497  |
| C  | 3.056167  | -2.940598 | 1.904320  |
| C  | 2.311418  | -0.743044 | 2.533864  |
| C  | 4.335208  | -2.443719 | 1.670622  |
| H  | 2.860295  | -3.994222 | 1.731847  |
| C  | 3.582667  | -0.236825 | 2.279670  |
| H  | 1.538309  | -0.063899 | 2.882297  |

|   |          |           |          |
|---|----------|-----------|----------|
| C | 4.595332 | -1.087703 | 1.844448 |
| H | 5.120720 | -3.108506 | 1.329300 |
| H | 3.782837 | 0.819341  | 2.419925 |
| H | 5.584229 | -0.693687 | 1.638977 |
| H | 0.134104 | -3.088735 | 4.061933 |

### TS<sub>11/12</sub>

| Symbol | X         | Y         | Z         |
|--------|-----------|-----------|-----------|
| Si     | 2.937162  | 2.734236  | -1.051452 |
| H      | -0.443759 | -0.540425 | 0.227432  |
| H      | 4.186141  | 3.507273  | -0.864420 |
| F      | -4.473593 | -3.093682 | -3.127275 |
| F      | -5.100652 | -1.312911 | 3.648431  |
| F      | -3.975731 | -0.857268 | -1.755357 |
| C      | -3.429249 | -3.043129 | -2.298121 |
| C      | -3.157561 | -0.148291 | 4.268184  |
| C      | -3.923848 | -0.785399 | 3.306996  |
| C      | -3.143933 | -1.892854 | -1.579543 |
| C      | -2.619314 | -4.157007 | -2.152639 |
| F      | -1.195145 | 1.029995  | 4.821254  |
| C      | -1.944533 | 0.409527  | 3.906771  |
| F      | -4.265243 | -1.469637 | 1.120637  |
| C      | -3.460604 | -0.861332 | 2.002675  |
| C      | -1.525882 | 0.309700  | 2.590306  |
| C      | -2.244965 | -0.331773 | 1.593406  |
| C      | -2.070321 | -1.784789 | -0.707254 |
| C      | -1.545802 | -4.103839 | -1.282185 |
| F      | -0.339481 | 0.889102  | 2.302983  |
| C      | -1.307976 | -2.936079 | -0.575978 |
| B      | -1.630652 | -0.432016 | 0.087118  |
| F      | -0.748345 | -5.166513 | -1.137810 |
| F      | -0.252616 | -2.960597 | 0.262563  |
| C      | -1.887995 | 0.925979  | -0.779557 |
| F      | -4.047682 | 1.328834  | 0.100839  |
| F      | 0.247416  | 0.758279  | -1.814009 |
| C      | -3.036197 | 1.702863  | -0.695337 |
| C      | -0.931293 | 1.408329  | -1.658982 |
| C      | -3.216540 | 2.878809  | -1.405237 |
| C      | -1.078102 | 2.558465  | -2.415403 |
| F      | -4.325656 | 3.607230  | -1.258628 |
| F      | -0.119887 | 2.954451  | -3.256471 |
| C      | -2.229239 | 3.309354  | -2.274038 |
| F      | -2.873846 | -5.268318 | -2.841169 |
| F      | -2.378011 | 4.446434  | -2.951203 |

F -3.587074 -0.068341 5.526340  
 H 2.800821 2.420605 -2.492771  
 C 1.423381 3.678088 -0.484633  
 C 0.668071 3.310760 0.631812  
 C 0.994315 4.776420 -1.244783  
 C -0.501617 3.990455 0.963378  
 H 0.976693 2.483139 1.259286  
 C -0.159820 5.471996 -0.906329  
 H 1.552827 5.080968 -2.124724  
 C -0.917268 5.069965 0.192628  
 H -1.082911 3.671437 1.820828  
 H -0.481969 6.311851 -1.510126  
 H -1.832315 5.595471 0.441250  
 C 3.923291 0.071296 1.854932  
 C 4.766412 -0.396389 2.854766  
 C 4.350494 0.904889 0.812906  
 C 6.091467 0.008714 2.789421  
 H 4.411073 -1.048532 3.642916  
 C 5.686259 1.303869 0.769267  
 C 6.543743 0.849309 1.761890  
 H 6.788257 -0.327103 3.547068  
 H 6.047832 1.951430 -0.020966  
 H 7.584016 1.150183 1.746313  
 C 3.202927 1.110401 -0.100183  
 C 2.146546 0.395775 0.553873  
 H 3.402604 0.324992 -1.066345  
 N 2.566906 -0.217128 1.643343  
 C 1.780653 -1.139135 2.459898  
 H 2.346777 -2.062601 2.578242  
 H 1.579693 -0.687275 3.431353  
 H 0.846616 -1.348113 1.941164  
 H 1.122402 0.277153 0.226553  
 H 2.905571 -1.727590 -3.708287  
 H 1.206454 -2.839420 -2.442296  
 C 2.780439 -2.601601 -0.953396  
 C 3.957928 -1.866634 -1.096530  
 C 5.091981 -2.132487 -0.343572  
 C 5.023496 -3.176720 0.579150  
 C 3.856193 -3.919350 0.734490  
 C 2.723781 -3.636530 -0.033947  
 C 1.733425 -2.056127 -1.895650  
 C 2.572026 -1.165580 -2.829077  
 H 5.998282 -1.548442 -0.451152  
 H 5.893501 -3.407433 1.182000

H 1.815862 -4.216159 0.080752  
 H 0.984194 -1.471280 -1.354690  
 N 3.766783 -0.796539 -2.022885  
 C 4.927452 -0.351585 -2.791650  
 H 5.684919 0.045355 -2.113897  
 H 5.354830 -1.174918 -3.373015  
 H 4.614145 0.445532 -3.466134  
 H 3.827451 -4.729861 1.452682  
 H 2.053759 -0.263319 -3.153952

**TS<sub>13/14</sub>**

| Symbol | X         | Y         | Z         |
|--------|-----------|-----------|-----------|
| H      | -0.350955 | -0.192168 | -1.525569 |
| F      | -3.725172 | -2.937847 | 2.362300  |
| F      | 3.323538  | -2.507093 | 0.913290  |
| F      | -2.238595 | -0.708771 | 2.038768  |
| C      | -3.095358 | -2.714681 | 1.212278  |
| C      | 2.865126  | -0.643207 | 2.280093  |
| C      | 2.537804  | -1.482228 | 1.229914  |
| C      | -2.324063 | -1.583479 | 1.027874  |
| C      | -3.211178 | -3.625488 | 0.173091  |
| F      | 2.337745  | 1.206920  | 3.624553  |
| C      | 2.024979  | 0.408743  | 2.605958  |
| F      | 1.113773  | -2.023864 | -0.530370 |
| C      | 1.387571  | -1.220553 | 0.510539  |
| C      | 0.876381  | 0.629064  | 1.862813  |
| C      | 0.535262  | -0.158291 | 0.772115  |
| C      | -1.658897 | -1.303683 | -0.157395 |
| C      | -2.560512 | -3.388197 | -1.023953 |
| F      | 0.100008  | 1.648708  | 2.241874  |
| C      | -1.799743 | -2.237627 | -1.167547 |
| B      | -0.743761 | 0.025414  | -0.182859 |
| F      | -2.667597 | -4.261103 | -2.022575 |
| F      | -1.185940 | -2.057708 | -2.347630 |
| C      | -1.507053 | 1.439285  | -0.209746 |
| F      | -3.710134 | 0.541734  | -0.212016 |
| F      | 0.556737  | 2.578242  | -0.217343 |
| C      | -2.888999 | 1.595323  | -0.222065 |
| C      | -0.784706 | 2.626884  | -0.232299 |
| C      | -3.506332 | 2.838259  | -0.250497 |
| C      | -1.357190 | 3.882538  | -0.270802 |
| F      | -4.832940 | 2.930773  | -0.259143 |
| F      | -0.603637 | 4.977598  | -0.300741 |
| C      | -2.738436 | 3.987130  | -0.277711 |

|   |           |           |           |
|---|-----------|-----------|-----------|
| F | -3.946282 | -4.720484 | 0.327350  |
| F | -3.317681 | 5.179079  | -0.312782 |
| F | 3.980830  | -0.842050 | 2.969750  |
| H | 0.360020  | 0.235636  | -1.508953 |
| H | 2.451704  | -0.202212 | -4.185162 |
| H | 3.803001  | -1.957947 | -3.401464 |
| C | 3.816223  | -0.670473 | -1.643102 |
| C | 3.070783  | 0.493518  | -1.462056 |
| C | 3.461164  | 1.470271  | -0.554119 |
| C | 4.620822  | 1.247497  | 0.187723  |
| C | 5.370762  | 0.085346  | 0.019690  |
| C | 4.970682  | -0.879151 | -0.904804 |
| C | 3.127126  | -1.566583 | -2.640835 |
| C | 2.072905  | -0.623616 | -3.248147 |
| H | 2.882481  | 2.373161  | -0.409675 |
| H | 4.937707  | 1.992080  | 0.908640  |
| H | 5.547465  | -1.787356 | -1.037262 |
| H | 2.668662  | -2.414182 | -2.131446 |
| N | 1.896028  | 0.496533  | -2.276749 |
| C | 1.612638  | 1.765859  | -2.963109 |
| H | 1.489375  | 2.567565  | -2.240004 |
| H | 2.424090  | 2.022743  | -3.652923 |
| H | 0.685282  | 1.659681  | -3.529336 |
| H | 6.266291  | -0.068147 | 0.608884  |
| H | 1.113001  | -1.103624 | -3.445182 |

**TS<sub>15/16</sub>**

| Symbol | X         | Y         | Z         |
|--------|-----------|-----------|-----------|
| H      | -1.088860 | 0.112110  | 1.479665  |
| F      | -4.229669 | 2.620009  | -2.906204 |
| F      | 0.914198  | -0.992298 | -3.814596 |
| F      | -3.275721 | 0.304268  | -1.940160 |
| C      | -3.484437 | 2.612304  | -1.799842 |
| C      | 0.961704  | -2.604777 | -2.106116 |
| C      | 0.528868  | -1.392430 | -2.600266 |
| C      | -2.983009 | 1.433685  | -1.279678 |
| C      | -3.201881 | 3.808091  | -1.156492 |
| F      | 1.034142  | -4.134460 | -0.321325 |
| C      | 0.576970  | -2.987003 | -0.831718 |
| F      | -0.577478 | 0.616644  | -2.356575 |
| C      | -0.277605 | -0.580586 | -1.812194 |
| C      | -0.243655 | -2.154431 | -0.095557 |
| C      | -0.720690 | -0.926792 | -0.546046 |
| C      | -2.189032 | 1.366240  | -0.140905 |

|   |           |           |           |
|---|-----------|-----------|-----------|
| C | -2.430721 | 3.793979  | -0.010563 |
| F | -0.577592 | -2.581142 | 1.135307  |
| C | -1.955768 | 2.582569  | 0.474623  |
| B | -1.693850 | -0.072541 | 0.451758  |
| F | -2.135817 | 4.940044  | 0.609438  |
| F | -1.200164 | 2.663371  | 1.591027  |
| C | -3.055132 | -0.896103 | 0.847100  |
| F | -3.027572 | -2.463996 | -0.938543 |
| F | -3.347303 | 0.579926  | 2.670387  |
| C | -3.608772 | -1.970708 | 0.166427  |
| C | -3.778508 | -0.473299 | 1.955884  |
| C | -4.779262 | -2.602475 | 0.563283  |
| C | -4.950347 | -1.071865 | 2.386532  |
| F | -5.264449 | -3.638325 | -0.126185 |
| F | -5.599024 | -0.623019 | 3.464488  |
| C | -5.454473 | -2.151338 | 1.681870  |
| F | -3.667684 | 4.957580  | -1.641746 |
| F | -6.580879 | -2.745669 | 2.075629  |
| F | 1.777855  | -3.377372 | -2.822150 |
| H | 1.712067  | -0.926731 | 1.908818  |
| C | 2.732205  | -0.419947 | -0.040261 |
| C | 2.446750  | 0.680179  | -0.857929 |
| C | 2.928225  | 0.815154  | -2.155202 |
| C | 3.717034  | -0.221793 | -2.632119 |
| C | 4.009562  | -1.339441 | -1.836506 |
| C | 3.529683  | -1.448308 | -0.539440 |
| C | 2.126323  | -0.146723 | 1.276060  |
| C | 1.388210  | 1.059832  | 1.072139  |
| H | 2.682899  | 1.671000  | -2.771743 |
| H | 4.101973  | -0.173026 | -3.642792 |
| H | 3.764310  | -2.313106 | 0.069782  |
| H | 3.136629  | 0.274966  | 1.969896  |
| N | 1.624559  | 1.559108  | -0.128102 |
| C | 1.123532  | 2.825226  | -0.654023 |
| H | 1.960195  | 3.416803  | -1.026145 |
| H | 0.419739  | 2.621004  | -1.461630 |
| H | 0.625971  | 3.361495  | 0.150224  |
| H | 4.619651  | -2.134652 | -2.246489 |
| H | 0.744817  | 1.581112  | 1.765833  |
| H | 5.123505  | 2.581121  | 3.146614  |
| H | 5.597416  | 3.203057  | 0.885347  |
| C | 5.743969  | 1.028244  | 0.788029  |
| C | 5.403524  | 0.128536  | 1.796432  |
| C | 5.949719  | -1.142143 | 1.873564  |

|   |          |           |           |
|---|----------|-----------|-----------|
| C | 6.853298 | -1.513165 | 0.877075  |
| C | 7.185621 | -0.636198 | -0.151509 |
| C | 6.634526 | 0.646267  | -0.199637 |
| C | 4.976332 | 2.313480  | 0.984499  |
| C | 4.434483 | 2.148694  | 2.414333  |
| H | 5.687447 | -1.829299 | 2.668487  |
| H | 7.300739 | -2.499130 | 0.907721  |
| H | 6.901514 | 1.331072  | -0.996242 |
| H | 4.164426 | 2.389393  | 0.254827  |
| N | 4.376648 | 0.681120  | 2.621666  |
| C | 4.306224 | 0.245048  | 4.015906  |
| H | 4.102827 | -0.825106 | 4.053547  |
| H | 5.242221 | 0.459700  | 4.539053  |
| H | 3.485727 | 0.771195  | 4.503829  |
| H | 7.887368 | -0.947880 | -0.915297 |
| H | 3.441821 | 2.577946  | 2.567329  |

**TS<sub>17/18</sub>**

| Symbol | X         | Y         | Z         |
|--------|-----------|-----------|-----------|
| H      | -1.023405 | -0.200671 | -1.537984 |
| F      | -1.649089 | -2.952207 | 3.679563  |
| F      | 0.755968  | 3.174971  | 2.752216  |
| F      | -2.361235 | -0.795914 | 2.255551  |
| C      | -1.111788 | -2.737436 | 2.477848  |
| C      | -0.228243 | 4.017263  | 0.791890  |
| C      | 0.044967  | 2.960625  | 1.637592  |
| C      | -1.466037 | -1.635922 | 1.719121  |
| C      | -0.180418 | -3.632476 | 1.975489  |
| F      | -1.139483 | 4.770729  | -1.239204 |
| C      | -0.906341 | 3.768499  | -0.388041 |
| F      | 0.001863  | 0.712468  | 2.166950  |
| C      | -0.359001 | 1.677833  | 1.296115  |
| C      | -1.294749 | 2.474639  | -0.686233 |
| C      | -1.040279 | 1.375897  | 0.127276  |
| C      | -0.935261 | -1.355276 | 0.466219  |
| C      | 0.377559  | -3.397036 | 0.733727  |
| F      | -1.934179 | 2.299670  | -1.855487 |
| C      | -0.003009 | -2.273107 | 0.013802  |
| B      | -1.477246 | -0.096817 | -0.425173 |
| F      | 1.275410  | -4.259624 | 0.236721  |
| F      | 0.620322  | -2.104161 | -1.172892 |
| C      | -3.099531 | -0.261496 | -0.568168 |
| F      | -3.723478 | 1.474390  | 0.926563  |
| F      | -2.743746 | -2.071841 | -2.047319 |

|   |           |           |           |
|---|-----------|-----------|-----------|
| C | -4.067447 | 0.495794  | 0.075138  |
| C | -3.595045 | -1.261996 | -1.394829 |
| C | -5.429872 | 0.298829  | -0.100650 |
| C | -4.944672 | -1.495720 | -1.598120 |
| F | -6.319778 | 1.060628  | 0.541165  |
| F | -5.361587 | -2.471108 | -2.410414 |
| C | -5.872074 | -0.702974 | -0.944773 |
| F | 0.174229  | -4.704198 | 2.681693  |
| F | -7.177375 | -0.907281 | -1.123431 |
| F | 0.177933  | 5.250190  | 1.094130  |
| H | 1.145281  | 0.210675  | -1.735860 |
| C | 2.148762  | 2.117380  | -1.043946 |
| C | 2.730454  | 2.372319  | 0.211208  |
| C | 3.140452  | 3.641986  | 0.614026  |
| C | 2.929978  | 4.677424  | -0.282065 |
| C | 2.337528  | 4.449892  | -1.536050 |
| C | 1.953756  | 3.178246  | -1.932157 |
| C | 1.879020  | 0.688468  | -1.100241 |
| C | 2.204519  | 0.205688  | 0.177453  |
| H | 3.577647  | 3.816297  | 1.589476  |
| H | 3.212244  | 5.685182  | -0.004384 |
| H | 1.484291  | 3.013282  | -2.895061 |
| H | 3.076107  | 0.176542  | -1.809771 |
| N | 2.739567  | 1.178077  | 0.927372  |
| C | 3.266316  | 1.026569  | 2.272640  |
| H | 4.342303  | 1.211706  | 2.275111  |
| H | 2.764427  | 1.730356  | 2.936454  |
| H | 3.073278  | 0.009713  | 2.607793  |
| H | 2.170204  | 5.289243  | -2.199640 |
| H | 2.116422  | -0.795550 | 0.576854  |
| C | 4.685988  | -1.017407 | -1.174907 |
| C | 4.108527  | -2.296662 | -1.166168 |
| C | 4.211059  | -3.170752 | -0.087264 |
| C | 4.926730  | -2.719195 | 1.010890  |
| C | 5.514985  | -1.443640 | 1.024628  |
| C | 5.393725  | -0.580648 | -0.054549 |
| C | 4.212643  | -0.356908 | -2.387120 |
| C | 3.537831  | -1.370164 | -3.110758 |
| H | 3.743388  | -4.146504 | -0.096474 |
| H | 5.036212  | -3.363555 | 1.874093  |
| H | 5.831758  | 0.410690  | -0.029931 |
| H | 4.666800  | 0.503477  | -2.859741 |
| N | 3.428874  | -2.472189 | -2.378492 |
| C | 2.729906  | -3.697919 | -2.747899 |

|   |          |           |           |
|---|----------|-----------|-----------|
| H | 3.451296 | -4.510747 | -2.831629 |
| H | 1.989545 | -3.930860 | -1.985452 |
| H | 2.235098 | -3.542809 | -3.703175 |
| H | 6.071405 | -1.129673 | 1.899559  |
| H | 3.075255 | -1.308050 | -4.085515 |

**TS<sub>19/20</sub>**

| Symbol | X         | Y         | Z         |
|--------|-----------|-----------|-----------|
| H      | 0.367994  | -0.188273 | -1.587892 |
| F      | 2.945070  | 2.913214  | 2.810347  |
| F      | -3.199658 | 1.004805  | 2.845970  |
| F      | 1.580191  | 0.663089  | 2.226436  |
| C      | 2.513582  | 2.694461  | 1.570918  |
| C      | -3.267341 | -1.044545 | 1.701397  |
| C      | -2.624885 | 0.139882  | 2.006306  |
| C      | 1.809238  | 1.550282  | 1.249612  |
| C      | 2.770713  | 3.626611  | 0.576923  |
| F      | -3.329971 | -3.037389 | 0.458774  |
| C      | -2.699362 | -1.912892 | 0.785724  |
| F      | -0.905712 | 1.651200  | 1.688207  |
| C      | -1.421577 | 0.449476  | 1.389530  |
| C      | -1.497277 | -1.570156 | 0.198698  |
| C      | -0.803883 | -0.397080 | 0.481018  |
| C      | 1.326261  | 1.284391  | -0.024672 |
| C      | 2.325681  | 3.394994  | -0.711233 |
| F      | -0.998101 | -2.421943 | -0.706238 |
| C      | 1.623544  | 2.230973  | -0.989478 |
| B      | 0.591642  | -0.126588 | -0.276555 |
| F      | 2.572433  | 4.285756  | -1.669655 |
| F      | 1.225592  | 2.059793  | -2.262266 |
| C      | 1.673183  | -1.328746 | -0.222744 |
| F      | 0.816586  | -2.362081 | 1.732132  |
| F      | 2.707782  | -0.447258 | -2.146415 |
| C      | 1.726064  | -2.314423 | 0.752754  |
| C      | 2.685210  | -1.370724 | -1.173296 |
| C      | 2.712402  | -3.288726 | 0.779186  |
| C      | 3.683800  | -2.327323 | -1.184727 |
| F      | 2.724710  | -4.215703 | 1.734678  |
| F      | 4.625535  | -2.326736 | -2.125369 |
| C      | 3.694638  | -3.295937 | -0.195088 |
| F      | 3.441967  | 4.736885  | 0.862756  |
| F      | 4.643010  | -4.225656 | -0.181273 |
| F      | -4.451093 | -1.319955 | 2.234421  |
| H      | -0.391965 | 0.309505  | -1.714354 |

|   |           |           |           |
|---|-----------|-----------|-----------|
| C | -2.717762 | 0.186018  | -2.234140 |
| C | -3.466630 | 0.877681  | -1.263442 |
| C | -4.657346 | 0.384875  | -0.730113 |
| C | -5.087905 | -0.846442 | -1.194549 |
| C | -4.352666 | -1.559006 | -2.159141 |
| C | -3.173921 | -1.058406 | -2.685071 |
| C | -1.541896 | 0.993876  | -2.506684 |
| C | -1.692183 | 2.144212  | -1.725918 |
| H | -5.212329 | 0.931024  | 0.024276  |
| H | -6.002140 | -1.273090 | -0.800774 |
| H | -2.613565 | -1.616884 | -3.424943 |
| H | -0.932661 | 0.955624  | -3.399956 |
| N | -2.804994 | 2.066865  | -0.978141 |
| C | -3.251203 | 3.037209  | 0.009870  |
| H | -4.248134 | 3.392468  | -0.252237 |
| H | -3.275647 | 2.581620  | 1.000880  |
| H | -2.556082 | 3.873505  | 0.017768  |
| H | -4.718359 | -2.522245 | -2.492684 |
| H | -1.056321 | 3.016243  | -1.672697 |

**Si2-1**

| Symbol | X         | Y         | Z         |
|--------|-----------|-----------|-----------|
| F      | 1.808070  | -3.357489 | -3.350903 |
| F      | -5.964587 | -1.481127 | -0.854785 |
| F      | 0.672253  | -0.987059 | -3.191684 |
| C      | 0.910582  | -3.132572 | -2.392630 |
| C      | -5.296332 | 0.234915  | 0.603008  |
| C      | -5.001075 | -0.693290 | -0.382197 |
| C      | 0.311084  | -1.888952 | -2.271634 |
| C      | 0.591986  | -4.137626 | -1.500157 |
| F      | -4.559184 | 1.942814  | 2.045575  |
| C      | -4.294467 | 1.056014  | 1.087315  |
| F      | -3.476151 | -1.707295 | -1.807279 |
| C      | -3.705920 | -0.791169 | -0.859297 |
| C      | -3.016252 | 0.936119  | 0.568608  |
| C      | -2.668685 | 0.006358  | -0.397454 |
| C      | -0.613375 | -1.581179 | -1.276982 |
| C      | -0.352364 | -3.895876 | -0.518320 |
| F      | -2.081049 | 1.757951  | 1.075754  |
| C      | -0.950649 | -2.650180 | -0.444745 |
| B      | -1.170824 | -0.102650 | -0.966106 |
| F      | -0.676829 | -4.857262 | 0.343333  |
| F      | -1.895726 | -2.508283 | 0.490492  |
| C      | -0.734090 | 1.119903  | -1.920394 |

|    |           |           |           |
|----|-----------|-----------|-----------|
| F  | -2.938595 | 1.699912  | -2.582597 |
| F  | 1.534395  | 0.715231  | -1.439802 |
| C  | -1.622655 | 1.933612  | -2.610579 |
| C  | 0.603469  | 1.462048  | -2.061724 |
| C  | -1.210198 | 3.017997  | -3.374654 |
| C  | 1.058284  | 2.531164  | -2.804519 |
| F  | -2.101673 | 3.767809  | -4.017929 |
| F  | 2.360849  | 2.804098  | -2.884891 |
| C  | 0.134972  | 3.323159  | -3.468012 |
| F  | 1.181145  | -5.323917 | -1.585289 |
| F  | 0.540459  | 4.357725  | -4.192584 |
| F  | -6.532409 | 0.332996  | 1.079674  |
| C  | 4.007320  | -1.549769 | 0.067273  |
| C  | 3.983618  | -2.338140 | -1.088308 |
| C  | 3.763644  | -2.084339 | 1.356597  |
| C  | 3.717890  | -3.686750 | -0.930758 |
| H  | 4.154027  | -1.908639 | -2.069278 |
| C  | 3.496379  | -3.457801 | 1.479957  |
| C  | 3.473295  | -4.242131 | 0.341098  |
| H  | 3.681022  | -4.327152 | -1.803943 |
| H  | 3.311545  | -3.894417 | 2.455776  |
| H  | 3.261100  | -5.301677 | 0.420591  |
| C  | 3.841875  | -0.987795 | 2.277770  |
| C  | 4.138781  | 0.125270  | 1.535350  |
| H  | 3.705883  | -1.018360 | 3.347410  |
| N  | 4.235875  | -0.200495 | 0.203749  |
| C  | 4.684130  | 0.672490  | -0.866571 |
| H  | 5.603162  | 0.281561  | -1.307994 |
| H  | 3.919996  | 0.759354  | -1.640914 |
| H  | 4.882845  | 1.659238  | -0.451153 |
| H  | 4.284793  | 1.149361  | 1.847759  |
| Si | 0.634718  | 0.016405  | 1.313476  |
| H  | -0.464251 | 0.266025  | 0.164565  |
| H  | 1.632869  | -0.700625 | 0.518466  |
| C  | -0.288006 | -1.110022 | 2.458885  |
| C  | -1.479671 | -0.735796 | 3.095739  |
| C  | 0.178431  | -2.421222 | 2.615565  |
| C  | -2.182453 | -1.650576 | 3.869966  |
| H  | -1.871158 | 0.269820  | 2.978391  |
| C  | -0.524479 | -3.335950 | 3.392247  |
| H  | 1.087011  | -2.736290 | 2.110745  |
| C  | -1.705129 | -2.950764 | 4.017395  |
| H  | -3.105776 | -1.353397 | 4.353033  |
| H  | -0.156524 | -4.349501 | 3.497606  |

|   |           |           |           |
|---|-----------|-----------|-----------|
| H | -2.259076 | -3.664319 | 4.615941  |
| C | 1.618552  | 3.819085  | 2.503049  |
| C | 2.219720  | 5.072647  | 2.371397  |
| C | 1.715010  | 2.813860  | 1.515418  |
| C | 2.938621  | 5.312025  | 1.213616  |
| H | 2.125361  | 5.826369  | 3.144175  |
| C | 2.460380  | 3.085977  | 0.359913  |
| C | 3.059990  | 4.325445  | 0.218272  |
| H | 3.417043  | 6.273519  | 1.072172  |
| H | 2.579031  | 2.334645  | -0.407765 |
| H | 3.630870  | 4.540804  | -0.677471 |
| C | 0.977721  | 1.667211  | 2.004229  |
| C | 0.493664  | 2.050063  | 3.244062  |
| N | 0.866802  | 3.319539  | 3.546329  |
| C | 0.548542  | 4.050257  | 4.759634  |
| H | 1.464395  | 4.324329  | 5.285679  |
| H | -0.013073 | 4.953417  | 4.516143  |
| H | -0.057787 | 3.415895  | 5.402462  |
| H | -0.095551 | 1.483068  | 3.950588  |

#### Si2-2

| Symbol | X         | Y         | Z         |
|--------|-----------|-----------|-----------|
| F      | -1.914684 | -2.225650 | -4.232750 |
| F      | -6.434547 | 1.050476  | -0.046498 |
| F      | -1.872156 | 0.119770  | -2.979839 |
| C      | -1.759888 | -2.188846 | -2.905317 |
| C      | -5.451712 | 0.548616  | 2.031277  |
| C      | -5.336976 | 0.808398  | 0.674887  |
| C      | -1.720479 | -0.980067 | -2.224911 |
| C      | -1.607789 | -3.370858 | -2.206327 |
| F      | -4.419311 | 0.044545  | 4.081405  |
| C      | -4.313375 | 0.297213  | 2.773372  |
| F      | -4.016161 | 1.060564  | -1.221867 |
| C      | -4.081658 | 0.806191  | 0.095522  |
| C      | -3.073187 | 0.310555  | 2.149083  |
| C      | -2.908967 | 0.567722  | 0.797765  |
| C      | -1.510288 | -0.881558 | -0.856566 |
| C      | -1.400496 | -3.327878 | -0.840379 |
| F      | -2.016433 | 0.060994  | 2.940728  |
| C      | -1.373061 | -2.100184 | -0.202936 |
| B      | -1.466181 | 0.486538  | 0.044822  |
| F      | -1.210560 | -4.464099 | -0.163777 |
| F      | -1.192419 | -2.125717 | 1.126834  |
| C      | -1.045138 | 1.820067  | -0.798054 |

|    |           |           |           |
|----|-----------|-----------|-----------|
| F  | -2.570258 | 3.288517  | 0.278004  |
| F  | 0.638872  | 0.621291  | -1.977103 |
| C  | -1.564931 | 3.090959  | -0.590073 |
| C  | 0.003361  | 1.786765  | -1.706267 |
| C  | -1.090745 | 4.234105  | -1.220252 |
| C  | 0.507176  | 2.894515  | -2.359019 |
| F  | -1.631490 | 5.426308  | -0.960844 |
| F  | 1.563377  | 2.776945  | -3.178086 |
| C  | -0.038140 | 4.139667  | -2.110466 |
| F  | -1.611049 | -4.542154 | -2.847952 |
| F  | 0.460523  | 5.225793  | -2.700778 |
| F  | -6.651144 | 0.541574  | 2.613775  |
| C  | 2.670260  | -2.084512 | -2.272229 |
| C  | 1.913099  | -2.584820 | -3.322307 |
| C  | 2.843385  | -2.751809 | -1.054551 |
| C  | 1.334609  | -3.830115 | -3.123801 |
| H  | 1.777785  | -2.037451 | -4.246769 |
| C  | 2.230600  | -3.988632 | -0.864756 |
| C  | 1.493384  | -4.520737 | -1.915047 |
| H  | 0.732476  | -4.267493 | -3.910326 |
| H  | 2.321022  | -4.519936 | 0.074571  |
| H  | 1.013673  | -5.484125 | -1.792298 |
| C  | 3.626250  | -1.851193 | -0.175450 |
| C  | 3.990315  | -0.763342 | -1.052378 |
| H  | 4.397108  | -2.227609 | 0.494311  |
| N  | 3.393324  | -0.873779 | -2.213221 |
| C  | 3.438710  | 0.092747  | -3.308592 |
| H  | 3.875865  | -0.387177 | -4.183414 |
| H  | 2.424941  | 0.426592  | -3.524442 |
| H  | 4.047593  | 0.940403  | -3.001968 |
| H  | 4.612138  | 0.092253  | -0.820525 |
| Si | 2.271510  | -0.959998 | 1.005754  |
| H  | -0.612241 | 0.351295  | 0.887793  |
| H  | 1.186601  | -0.740967 | 0.035262  |
| C  | 1.870265  | -2.146969 | 2.383999  |
| C  | 0.756793  | -1.823327 | 3.173690  |
| C  | 2.621398  | -3.279328 | 2.714294  |
| C  | 0.401110  | -2.618321 | 4.256208  |
| H  | 0.147462  | -0.958230 | 2.929411  |
| C  | 2.266005  | -4.076063 | 3.799457  |
| H  | 3.494310  | -3.555007 | 2.130610  |
| C  | 1.155332  | -3.745917 | 4.569077  |
| H  | -0.468871 | -2.360230 | 4.848472  |
| H  | 2.854766  | -4.952656 | 4.042381  |

|   |          |           |           |
|---|----------|-----------|-----------|
| H | 0.876643 | -4.367818 | 5.411674  |
| C | 3.694541 | 2.759519  | 1.974487  |
| C | 4.014476 | 4.084411  | 1.670200  |
| C | 3.171599 | 1.864783  | 1.013951  |
| C | 3.796285 | 4.507127  | 0.369743  |
| H | 4.411281 | 4.757146  | 2.421324  |
| C | 2.958675 | 2.325316  | -0.292868 |
| C | 3.271302 | 3.638186  | -0.603977 |
| H | 4.027865 | 5.529749  | 0.097816  |
| H | 2.532792 | 1.665352  | -1.041795 |
| H | 3.099616 | 4.008255  | -1.608177 |
| C | 2.956470 | 0.599587  | 1.679922  |
| C | 3.348706 | 0.806622  | 2.987038  |
| N | 3.789649 | 2.081892  | 3.171770  |
| C | 4.263003 | 2.661279  | 4.415674  |
| H | 5.302837 | 2.977169  | 4.315328  |
| H | 3.648971 | 3.521626  | 4.686509  |
| H | 4.190285 | 1.911378  | 5.200475  |
| H | 3.329344 | 0.116291  | 3.819265  |

### Si2-3

| Symbol | X         | Y         | Z         |
|--------|-----------|-----------|-----------|
| F      | -6.213127 | -2.395605 | 1.288582  |
| F      | -4.838025 | 3.771714  | -0.982271 |
| F      | -4.334565 | -1.476532 | -0.404205 |
| C      | -5.138367 | -1.759297 | 1.760285  |
| C      | -2.900975 | 3.406411  | -2.257751 |
| C      | -3.754788 | 3.033780  | -1.239365 |
| C      | -4.153873 | -1.284273 | 0.912823  |
| C      | -5.000510 | -1.564751 | 3.125387  |
| F      | -0.919475 | 3.001594  | -3.459807 |
| C      | -1.775105 | 2.640259  | -2.500515 |
| F      | -4.352791 | 1.643248  | 0.502391  |
| C      | -3.470084 | 1.908115  | -0.475945 |
| C      | -1.531864 | 1.535871  | -1.708861 |
| C      | -2.351794 | 1.109134  | -0.671410 |
| C      | -3.023124 | -0.611152 | 1.351015  |
| C      | -3.889724 | -0.899259 | 3.609946  |
| F      | -0.396088 | 0.855908  | -1.987831 |
| C      | -2.928607 | -0.437763 | 2.721100  |
| B      | -1.881915 | -0.114429 | 0.304660  |
| F      | -3.755368 | -0.709175 | 4.925733  |
| F      | -1.882927 | 0.208685  | 3.262926  |
| C      | -1.322835 | -1.451069 | -0.464191 |



|    |           |           |           |
|----|-----------|-----------|-----------|
| F  | -2.314592 | -1.067124 | -2.581582 |
| F  | -0.204375 | -2.059503 | 1.535844  |
| C  | -1.548937 | -1.821972 | -1.781728 |
| C  | -0.516517 | -2.328365 | 0.251438  |
| C  | -0.994643 | -2.954681 | -2.362498 |
| C  | 0.051848  | -3.470641 | -0.284931 |
| F  | -1.205135 | -3.236069 | -3.649808 |
| F  | 0.875672  | -4.235648 | 0.444016  |
| C  | -0.188245 | -3.788084 | -1.609583 |
| F  | -5.933871 | -2.014374 | 3.964356  |
| F  | 0.366268  | -4.868972 | -2.156386 |
| F  | -3.132596 | 4.507793  | -2.972635 |
| C  | 2.798060  | -2.157085 | -0.821507 |
| C  | 3.254331  | -3.264475 | -1.516888 |
| C  | 2.091982  | -1.105106 | -1.407617 |
| C  | 2.966264  | -3.294343 | -2.877255 |
| H  | 3.787449  | -4.070996 | -1.029887 |
| C  | 1.818298  | -1.148588 | -2.769073 |
| C  | 2.257605  | -2.256028 | -3.489930 |
| H  | 3.285395  | -4.143106 | -3.468166 |
| H  | 1.259203  | -0.354935 | -3.248857 |
| H  | 2.038308  | -2.320001 | -4.548410 |
| C  | 1.778619  | -0.117821 | -0.337996 |
| C  | 2.295522  | -0.771663 | 0.855518  |
| H  | 0.722182  | 0.147713  | -0.229875 |
| N  | 2.889096  | -1.894740 | 0.570047  |
| C  | 3.585646  | -2.773310 | 1.504137  |
| H  | 3.145605  | -3.767013 | 1.438285  |
| H  | 4.641254  | -2.800031 | 1.231124  |
| H  | 3.469906  | -2.376503 | 2.509153  |
| H  | 2.245557  | -0.414695 | 1.876258  |
| Si | 2.583892  | 1.662345  | -0.610160 |
| H  | -0.956379 | 0.321924  | 0.948675  |
| H  | 2.957020  | 1.690756  | -2.040225 |
| C  | 1.251477  | 2.916846  | -0.255257 |
| C  | 0.973976  | 3.938603  | -1.171970 |
| C  | 0.455131  | 2.811876  | 0.892554  |
| C  | -0.073540 | 4.827162  | -0.949403 |
| H  | 1.564017  | 4.031011  | -2.077939 |
| C  | -0.604309 | 3.686768  | 1.108237  |
| H  | 0.637959  | 2.025733  | 1.620051  |
| C  | -0.868632 | 4.694755  | 0.185412  |
| H  | -0.286806 | 5.604188  | -1.674617 |
| H  | -1.228383 | 3.572251  | 1.986859  |

|   |           |           |           |
|---|-----------|-----------|-----------|
| H | -1.701086 | 5.370660  | 0.345019  |
| C | 5.858351  | 1.235396  | 1.805035  |
| C | 7.006886  | 0.552154  | 2.213959  |
| C | 5.127427  | 0.866781  | 0.653095  |
| C | 7.415638  | -0.520192 | 1.440020  |
| H | 7.556076  | 0.848029  | 3.099893  |
| C | 5.574995  | -0.215514 | -0.119919 |
| C | 6.709553  | -0.899581 | 0.281832  |
| H | 8.301810  | -1.073872 | 1.725281  |
| H | 5.050493  | -0.503779 | -1.026936 |
| H | 7.070185  | -1.733801 | -0.308262 |
| C | 4.004184  | 1.770821  | 0.552343  |
| C | 4.123034  | 2.621931  | 1.629647  |
| N | 5.224623  | 2.316506  | 2.377213  |
| C | 5.674031  | 3.001866  | 3.575378  |
| H | 5.701582  | 2.309851  | 4.418695  |
| H | 6.669288  | 3.421429  | 3.420135  |
| H | 4.978883  | 3.808003  | 3.799184  |
| H | 3.480174  | 3.439588  | 1.925379  |

#### Si2-4

| Symbol | X         | Y         | Z         |
|--------|-----------|-----------|-----------|
| Si     | -2.735385 | -0.311647 | -0.838961 |
| H      | 1.869174  | 0.523343  | 0.136417  |
| F      | 5.377840  | -0.588428 | -4.382106 |
| F      | 6.619388  | -0.452861 | 3.009000  |
| F      | 3.940897  | -1.769094 | -2.478506 |
| C      | 4.903660  | 0.139476  | -3.369401 |
| C      | 4.532219  | -1.129573 | 3.840672  |
| C      | 5.322455  | -0.683793 | 2.799132  |
| C      | 4.143784  | -0.446985 | -2.366979 |
| C      | 5.173763  | 1.494683  | -3.317173 |
| F      | 2.401253  | -1.797517 | 4.598689  |
| C      | 3.187843  | -1.369560 | 3.608136  |
| F      | 5.612453  | -0.041363 | 0.599998  |
| C      | 4.762641  | -0.475184 | 1.543739  |
| C      | 2.680894  | -1.153361 | 2.342005  |
| C      | 3.422372  | -0.693972 | 1.260737  |
| C      | 3.619674  | 0.260381  | -1.295661 |
| C      | 4.690452  | 2.240169  | -2.255176 |
| F      | 1.368556  | -1.421353 | 2.174914  |
| C      | 3.946371  | 1.608768  | -1.274657 |
| B      | 2.652949  | -0.364512 | -0.141223 |
| F      | 4.939470  | 3.550617  | -2.192682 |

|   |           |           |           |
|---|-----------|-----------|-----------|
| F | 3.528192  | 2.383016  | -0.254434 |
| C | 1.754093  | -1.594864 | -0.732480 |
| F | 2.661246  | -3.338792 | 0.600549  |
| F | 0.683242  | -0.053240 | -2.174036 |
| C | 1.804274  | -2.926007 | -0.347797 |
| C | 0.823786  | -1.321300 | -1.727917 |
| C | 0.986900  | -3.910121 | -0.883524 |
| C | 0.007322  | -2.274797 | -2.311976 |
| F | 1.049128  | -5.164215 | -0.432617 |
| F | -0.868350 | -1.952101 | -3.268227 |
| C | 0.079555  | -3.584703 | -1.872452 |
| F | 5.894997  | 2.075737  | -4.274219 |
| F | -0.719364 | -4.514056 | -2.393211 |
| F | 5.053326  | -1.326738 | 5.049997  |
| H | -1.914760 | -0.075060 | -2.045160 |
| C | -2.343577 | -1.930275 | 0.008870  |
| C | -1.329436 | -2.079296 | 0.961497  |
| C | -3.043971 | -3.074817 | -0.400277 |
| C | -1.022579 | -3.327080 | 1.494722  |
| H | -0.744604 | -1.228058 | 1.287599  |
| C | -2.731726 | -4.325640 | 0.121632  |
| H | -3.839201 | -2.988451 | -1.134599 |
| C | -1.722159 | -4.452822 | 1.071375  |
| H | -0.221917 | -3.416375 | 2.219838  |
| H | -3.273694 | -5.200996 | -0.215496 |
| H | -1.474833 | -5.427781 | 1.473938  |
| C | -2.136607 | 1.439038  | 2.567612  |
| C | -2.504760 | 1.591605  | 3.895029  |
| C | -3.042801 | 1.442248  | 1.506211  |
| C | -3.860827 | 1.771586  | 4.139421  |
| H | -1.779119 | 1.577063  | 4.698327  |
| C | -4.394560 | 1.634786  | 1.767865  |
| C | -4.788242 | 1.799158  | 3.091929  |
| H | -4.203975 | 1.896742  | 5.158535  |
| H | -5.119580 | 1.652263  | 0.963615  |
| H | -5.836630 | 1.948720  | 3.318296  |
| C | -2.267915 | 1.240325  | 0.253256  |
| C | -0.891002 | 1.223459  | 0.726250  |
| H | -2.415528 | 2.011788  | -0.516095 |
| N | -0.834180 | 1.303336  | 2.028633  |
| C | 0.368343  | 1.258527  | 2.857600  |
| H | 0.377274  | 2.140798  | 3.494974  |
| H | 0.345384  | 0.351864  | 3.462576  |
| H | 1.241770  | 1.257567  | 2.207345  |

|   |           |           |           |
|---|-----------|-----------|-----------|
| H | 0.012560  | 1.118950  | 0.134478  |
| C | -1.520295 | 4.458510  | 0.082037  |
| C | -0.195760 | 4.019967  | -0.169899 |
| C | 0.804639  | 4.035655  | 0.809564  |
| C | 0.441830  | 4.475970  | 2.069768  |
| C | -0.880278 | 4.872629  | 2.358547  |
| C | -1.859147 | 4.870028  | 1.381595  |
| C | -2.238494 | 4.321834  | -1.151586 |
| C | -1.354400 | 3.805327  | -2.063590 |
| H | 1.815264  | 3.713064  | 0.587100  |
| H | 1.189567  | 4.513356  | 2.853668  |
| H | -2.871276 | 5.183213  | 1.611607  |
| H | -3.271143 | 4.570733  | -1.338529 |
| N | -0.126409 | 3.609886  | -1.479599 |
| C | 1.069300  | 3.089069  | -2.120190 |
| H | 1.883372  | 3.814159  | -2.048608 |
| H | 1.378293  | 2.154033  | -1.648397 |
| H | 0.848834  | 2.896694  | -3.168367 |
| H | -1.127303 | 5.194092  | 3.363342  |
| H | -1.497984 | 3.555976  | -3.104343 |
| C | -6.814047 | -0.324987 | -1.279506 |
| C | -8.113463 | -0.604076 | -0.846855 |
| C | -5.671195 | -0.634399 | -0.508514 |
| C | -8.250677 | -1.205591 | 0.391495  |
| H | -8.977026 | -0.360586 | -1.454455 |
| C | -5.843768 | -1.244970 | 0.743676  |
| C | -7.127104 | -1.521933 | 1.179301  |
| H | -9.241312 | -1.438430 | 0.762831  |
| H | -4.984722 | -1.491030 | 1.358894  |
| H | -7.274797 | -1.993086 | 2.143483  |
| C | -4.517038 | -0.197280 | -1.263721 |
| C | -5.025939 | 0.334945  | -2.430498 |
| N | -6.387410 | 0.266085  | -2.449784 |
| C | -7.262208 | 0.713257  | -3.517717 |
| H | -7.846491 | -0.124261 | -3.902226 |
| H | -7.939372 | 1.487532  | -3.153174 |
| H | -6.653956 | 1.121250  | -4.322010 |
| H | -4.499233 | 0.760784  | -3.273301 |

#### Si2-5

| Symbol | X         | Y         | Z         |
|--------|-----------|-----------|-----------|
| F      | -1.432253 | -2.038638 | -3.399431 |
| F      | -7.444157 | -1.718255 | -0.456940 |
| F      | -2.473327 | 0.116462  | -2.271597 |

|   |           |           |           |    |           |           |           |
|---|-----------|-----------|-----------|----|-----------|-----------|-----------|
| C | -1.575942 | -2.000310 | -2.068056 | N  | 0.862155  | -0.180021 | -2.877774 |
| C | -7.116534 | -1.106035 | 1.791456  | C  | 0.349536  | 0.433178  | -4.090210 |
| C | -6.666598 | -1.172109 | 0.482902  | H  | 1.159883  | 0.619085  | -4.797801 |
| C | -2.127622 | -0.889917 | -1.447343 | H  | -0.395866 | -0.216689 | -4.549172 |
| C | -1.162771 | -3.076358 | -1.308151 | H  | -0.120520 | 1.378932  | -3.826744 |
| F | -6.740290 | -0.466357 | 4.021046  | H  | 0.295734  | 1.293269  | -1.480542 |
| C | -6.310768 | -0.534087 | 2.757086  | Si | 1.401152  | -0.207613 | 1.175797  |
| F | -5.042174 | -0.739945 | -1.113172 | H  | -2.458919 | 0.630043  | 1.737173  |
| C | -5.417201 | -0.665754 | 0.174550  | H  | 0.033146  | -0.066412 | 1.722278  |
| C | -5.063265 | -0.038272 | 2.400816  | C  | 2.150511  | -1.742766 | 1.967686  |
| C | -4.568702 | -0.082780 | 1.106875  | C  | 1.314610  | -2.757026 | 2.444172  |
| C | -2.324594 | -0.792278 | -0.078125 | C  | 3.534530  | -1.961920 | 1.989740  |
| C | -1.332152 | -3.030363 | 0.064516  | C  | 1.837384  | -3.968055 | 2.893480  |
| F | -4.341366 | 0.500182  | 3.395306  | H  | 0.240229  | -2.606013 | 2.455763  |
| C | -1.907956 | -1.907893 | 0.639305  | C  | 4.064879  | -3.162062 | 2.452616  |
| B | -3.069201 | 0.435333  | 0.718953  | H  | 4.203834  | -1.180506 | 1.641022  |
| F | -0.948004 | -4.072186 | 0.811199  | C  | 3.213076  | -4.173555 | 2.894573  |
| F | -2.061521 | -1.940679 | 1.975317  | H  | 1.170513  | -4.746351 | 3.245831  |
| C | -3.035366 | 1.826191  | -0.142012 | H  | 5.139658  | -3.310688 | 2.474922  |
| F | -5.328947 | 1.915949  | -0.769604 | H  | 3.621945  | -5.112612 | 3.249421  |
| F | -0.723251 | 2.018068  | 0.348362  | C  | 3.640801  | 3.206224  | 1.958789  |
| C | -4.091584 | 2.435021  | -0.806009 | C  | 4.138580  | 4.484188  | 1.694331  |
| C | -1.824213 | 2.494432  | -0.269804 | C  | 2.747627  | 2.529542  | 1.090436  |
| C | -3.959230 | 3.591503  | -1.562505 | C  | 3.720988  | 5.099197  | 0.525836  |
| C | -1.638929 | 3.635453  | -1.030522 | H  | 4.825298  | 4.973934  | 2.375623  |
| F | -5.014746 | 4.122503  | -2.185000 | C  | 2.336461  | 3.190894  | -0.075682 |
| F | -0.428620 | 4.194233  | -1.149452 | C  | 2.823197  | 4.458565  | -0.347820 |
| C | -2.722110 | 4.194634  | -1.684936 | H  | 4.081404  | 6.092326  | 0.285989  |
| F | -0.605813 | -4.138300 | -1.887584 | H  | 1.634750  | 2.727602  | -0.754268 |
| F | -2.573346 | 5.296821  | -2.420001 | H  | 2.497528  | 4.973545  | -1.243861 |
| F | -8.317059 | -1.589130 | 2.114186  | C  | 2.500366  | 1.220571  | 1.655203  |
| C | 1.445738  | -1.419364 | -2.797846 | C  | 3.247598  | 1.193859  | 2.814031  |
| C | 1.713656  | -2.330250 | -3.824177 | N  | 3.921230  | 2.368138  | 3.009628  |
| C | 1.737429  | -1.676265 | -1.430703 | C  | 4.808262  | 2.678344  | 4.112092  |
| C | 2.285325  | -3.538874 | -3.467882 | H  | 5.836544  | 2.796934  | 3.761427  |
| H | 1.464852  | -2.103357 | -4.854254 | H  | 4.489822  | 3.598310  | 4.605244  |
| C | 2.290463  | -2.932330 | -1.106192 | H  | 4.771667  | 1.861933  | 4.830563  |
| C | 2.559317  | -3.836606 | -2.118892 | H  | 3.342790  | 0.402111  | 3.544495  |
| H | 2.495803  | -4.277196 | -4.232056 | C  | 5.294564  | 0.720930  | -0.838445 |
| H | 2.490587  | -3.202752 | -0.076784 | C  | 5.846146  | -0.482750 | -0.411982 |
| H | 2.971101  | -4.806946 | -1.866641 | C  | 6.694761  | -0.605059 | 0.673362  |
| C | 1.314641  | -0.513653 | -0.671622 | C  | 6.990305  | 0.575590  | 1.351620  |
| C | 0.775119  | 0.335893  | -1.613968 | C  | 6.456913  | 1.797189  | 0.936912  |
| H | 3.354171  | 0.656703  | -1.810675 | C  | 5.602247  | 1.888154  | -0.160558 |

|   |          |           |           |
|---|----------|-----------|-----------|
| C | 4.411914 | 0.434098  | -2.017959 |
| C | 4.580429 | -1.033315 | -2.180912 |
| H | 7.101342 | -1.558070 | 0.988647  |
| H | 7.646877 | 0.542737  | 2.212087  |
| H | 5.181806 | 2.841709  | -0.460386 |
| H | 4.687120 | 0.965987  | -2.933899 |
| N | 5.373923 | -1.514752 | -1.281279 |
| C | 5.728822 | -2.920538 | -1.107392 |
| H | 6.811608 | -2.997337 | -1.019802 |
| H | 5.245946 | -3.286914 | -0.199426 |
| H | 5.372613 | -3.479986 | -1.967814 |
| H | 6.709124 | 2.700253  | 1.480321  |
| H | 4.136240 | -1.672409 | -2.936411 |

### Si2-6

| Symbol | X        | Y         | Z         |
|--------|----------|-----------|-----------|
| C      | 3.585887 | -0.025620 | -3.829454 |
| C      | 3.568684 | 0.635643  | -5.060345 |
| C      | 3.924422 | 0.623625  | -2.619157 |
| C      | 3.907878 | 1.977716  | -5.062094 |
| H      | 3.306035 | 0.119155  | -5.976354 |
| C      | 4.269889 | 1.982735  | -2.656641 |
| C      | 4.257503 | 2.644023  | -3.872342 |
| H      | 3.909552 | 2.525005  | -5.997221 |
| H      | 4.549502 | 2.500376  | -1.745234 |
| H      | 4.525060 | 3.693112  | -3.914559 |
| C      | 3.847930 | -0.361925 | -1.563894 |
| C      | 3.482801 | -1.531317 | -2.190888 |
| N      | 3.317200 | -1.343316 | -3.537875 |
| C      | 2.944456 | -2.349036 | -4.512090 |
| H      | 2.008686 | -2.076515 | -5.004397 |
| H      | 3.726855 | -2.457535 | -5.266110 |
| H      | 2.812319 | -3.300352 | -4.000390 |
| H      | 3.334259 | -2.515199 | -1.766594 |
| Si     | 4.238203 | -0.159284 | 0.237697  |
| H      | 3.135505 | 0.506495  | 0.981825  |
| C      | 4.477365 | -1.886073 | 0.950507  |
| C      | 3.379437 | -2.721833 | 1.194635  |
| C      | 5.759590 | -2.391736 | 1.195420  |
| C      | 3.555351 | -4.021763 | 1.659567  |
| H      | 2.371238 | -2.353730 | 1.023564  |
| C      | 5.941279 | -3.691033 | 1.661430  |
| H      | 6.627006 | -1.761436 | 1.020720  |
| C      | 4.839101 | -4.507860 | 1.892576  |

|   |           |           |           |
|---|-----------|-----------|-----------|
| H | 2.694133  | -4.653436 | 1.844678  |
| H | 6.941916  | -4.065219 | 1.845179  |
| H | 4.978804  | -5.519100 | 2.256789  |
| C | 7.851978  | 1.805442  | 0.156313  |
| C | 9.127446  | 2.025001  | -0.371522 |
| C | 6.972158  | 0.825984  | -0.360146 |
| C | 9.512870  | 1.236850  | -1.442383 |
| H | 9.787746  | 2.780044  | 0.039030  |
| C | 7.391688  | 0.046150  | -1.448921 |
| C | 8.653556  | 0.258062  | -1.976222 |
| H | 10.494188 | 1.377270  | -1.880095 |
| H | 6.731383  | -0.705894 | -1.868780 |
| H | 8.989285  | -0.336183 | -2.817655 |
| C | 5.758251  | 0.877903  | 0.424318  |
| C | 5.971931  | 1.873619  | 1.349247  |
| N | 7.213520  | 2.432857  | 1.201640  |
| C | 7.780365  | 3.505093  | 1.994975  |
| H | 8.681385  | 3.164511  | 2.509183  |
| H | 8.031308  | 4.356840  | 1.359662  |
| H | 7.047292  | 3.819328  | 2.735239  |
| H | 5.313249  | 2.240162  | 2.124356  |

### Si2-7

| Symbol | X         | Y         | Z         |
|--------|-----------|-----------|-----------|
| F      | -1.668815 | -2.336071 | -3.706986 |
| F      | -7.527073 | -0.673280 | -0.884199 |
| F      | -2.312865 | -0.020557 | -2.581225 |
| C      | -1.763150 | -2.258929 | -2.375754 |
| C      | -7.024958 | -0.720728 | 1.414924  |
| C      | -6.636977 | -0.518955 | 0.099828  |
| C      | -2.114082 | -1.066092 | -1.758703 |
| C      | -1.516412 | -3.381185 | -1.606438 |
| F      | -6.474828 | -0.746540 | 3.698408  |
| C      | -6.101870 | -0.553947 | 2.429877  |
| F      | -4.995204 | 0.038485  | -1.450116 |
| C      | -5.328279 | -0.159676 | -0.163270 |
| C      | -4.798510 | -0.187953 | 2.117889  |
| C      | -4.365785 | 0.022281  | 0.819350  |
| C      | -2.263485 | -0.929333 | -0.386561 |
| C      | -1.610541 | -3.287071 | -0.228554 |
| F      | -3.963300 | -0.039238 | 3.156044  |
| C      | -1.998674 | -2.084957 | 0.339282  |
| B      | -2.824925 | 0.379489  | 0.426568  |
| F      | -1.354710 | -4.358037 | 0.528297  |

|    |           |           |           |   |          |           |           |
|----|-----------|-----------|-----------|---|----------|-----------|-----------|
| F  | -2.130935 | -2.074485 | 1.678179  | H | 0.496961 | -5.123183 | 3.221048  |
| C  | -2.650303 | 1.794402  | -0.370364 | H | 4.662563 | -4.157285 | 2.866595  |
| F  | -4.821489 | 2.672790  | 0.035656  | H | 2.876236 | -5.784863 | 3.415616  |
| F  | -0.422773 | 1.193785  | -0.889294 | C | 3.212488 | 2.963905  | 2.763146  |
| C  | -3.578573 | 2.822990  | -0.446956 | C | 3.395709 | 4.347680  | 2.692369  |
| C  | -1.413641 | 2.115880  | -0.907371 | C | 2.223313 | 2.288754  | 2.012554  |
| C  | -3.300531 | 4.070185  | -0.995016 | C | 2.560917 | 5.055201  | 1.844818  |
| C  | -1.081574 | 3.342565  | -1.447279 | H | 4.159567 | 4.847650  | 3.276037  |
| F  | -4.237880 | 5.018730  | -1.030493 | C | 1.385580 | 3.038136  | 1.173262  |
| F  | 0.159311  | 3.582609  | -1.894680 | C | 1.563263 | 4.407440  | 1.091771  |
| C  | -2.040051 | 4.339762  | -1.492513 | H | 2.673054 | 6.129384  | 1.763108  |
| F  | -1.212326 | -4.544611 | -2.181748 | H | 0.602539 | 2.547323  | 0.608796  |
| F  | -1.745431 | 5.537539  | -1.995554 | H | 0.923330 | 4.992764  | 0.441844  |
| F  | -8.279922 | -1.071806 | 1.697274  | C | 2.341781 | 0.878218  | 2.310097  |
| C  | 1.632530  | -1.315678 | -2.339249 | C | 3.376716 | 0.789312  | 3.218189  |
| C  | 1.277674  | -2.088311 | -3.434313 | N | 3.901144 | 2.020630  | 3.492878  |
| C  | 2.035372  | -1.844308 | -1.111858 | C | 5.007813 | 2.308967  | 4.386179  |
| C  | 1.335724  | -3.464668 | -3.260693 | H | 5.832301 | 2.760956  | 3.830851  |
| H  | 0.960179  | -1.647915 | -4.370846 | H | 4.689355 | 2.989873  | 5.176918  |
| C  | 2.077875  | -3.227846 | -0.952442 | H | 5.347864 | 1.377810  | 4.834870  |
| C  | 1.728273  | -4.022789 | -2.038836 | H | 3.782516 | -0.083803 | 3.710517  |
| H  | 1.058187  | -4.115372 | -4.080069 | H | 7.257013 | 0.378393  | 0.703093  |
| H  | 2.381680  | -3.675017 | -0.013325 | H | 6.154916 | 2.514650  | 0.390335  |
| H  | 1.749862  | -5.100477 | -1.935341 | C | 5.267056 | 1.239512  | -1.157010 |
| C  | 2.396343  | -0.700380 | -0.230749 | C | 5.323418 | -0.160201 | -1.240281 |
| C  | 2.197781  | 0.449688  | -1.098189 | C | 5.061040 | -0.822547 | -2.434659 |
| H  | 3.426276  | -0.740943 | 0.162275  | C | 4.743068 | -0.049078 | -3.554760 |
| N  | 1.731577  | 0.092667  | -2.262368 | C | 4.687491 | 1.339410  | -3.482839 |
| C  | 1.293185  | 0.979140  | -3.333623 | C | 4.948958 | 1.992705  | -2.272145 |
| H  | 1.795120  | 0.691819  | -4.256429 | C | 5.522528 | 1.634160  | 0.279510  |
| H  | 0.211421  | 0.879765  | -3.440517 | C | 6.166473 | 0.357111  | 0.842077  |
| H  | 1.552349  | 2.001048  | -3.071397 | H | 5.097510 | -1.903457 | -2.503423 |
| H  | 2.355733  | 1.494789  | -0.859155 | H | 4.541281 | -0.546129 | -4.497073 |
| Si | 1.500645  | -0.548559 | 1.498306  | H | 4.904209 | 3.074607  | -2.209800 |
| H  | -2.175564 | 0.490281  | 1.437248  | H | 4.569054 | 1.831458  | 0.784792  |
| H  | 0.046155  | -0.397709 | 1.313670  | N | 5.576377 | -0.712807 | 0.020107  |
| C  | 1.940593  | -2.195869 | 2.255426  | C | 6.180979 | -2.029275 | 0.101862  |
| C  | 0.944559  | -3.124730 | 2.573616  | H | 5.517496 | -2.771962 | -0.346167 |
| C  | 3.283792  | -2.586828 | 2.366167  | H | 7.155528 | -2.066826 | -0.403273 |
| C  | 1.280143  | -4.411384 | 2.989004  | H | 6.319265 | -2.292045 | 1.151478  |
| H  | -0.101222 | -2.851927 | 2.483426  | H | 4.447635 | 1.917389  | -4.367156 |
| C  | 3.621089  | -3.867562 | 2.787880  | H | 5.946513 | 0.190999  | 1.898452  |
| H  | 4.076899  | -1.893849 | 2.093172  |   |          |           |           |
| C  | 2.615920  | -4.782635 | 3.096407  |   |          |           |           |

**Si2-8**

| Symbol | X         | Y         | Z         |    |           |           |           |
|--------|-----------|-----------|-----------|----|-----------|-----------|-----------|
| F      | 0.951904  | -0.823041 | 3.641733  | H  | -3.063627 | -4.595953 | 2.851851  |
| F      | 7.356481  | -0.659963 | 1.793025  | C  | -1.770483 | -0.738256 | 0.397449  |
| F      | 2.104792  | 0.955238  | 2.063264  | C  | -1.437950 | 0.446649  | 1.032081  |
| C      | 1.280915  | -1.175009 | 2.392311  | H  | -3.950488 | -0.088595 | 0.007793  |
| C      | 7.355627  | -1.162261 | -0.506212 | N  | -1.502566 | 0.328172  | 2.388527  |
| C      | 6.719199  | -0.662348 | 0.618676  | C  | -1.225095 | 1.378559  | 3.352170  |
| C      | 1.905269  | -0.270465 | 1.545715  | H  | -2.117202 | 1.589920  | 3.944742  |
| C      | 1.002590  | -2.452795 | 1.949720  | H  | -0.407889 | 1.077059  | 4.007202  |
| F      | 7.306417  | -1.636738 | -2.806529 | H  | -0.933079 | 2.276276  | 2.809977  |
| C      | 6.694785  | -1.156361 | -1.719629 | H  | -1.112957 | 1.384759  | 0.606761  |
| F      | 4.859761  | 0.313295  | 1.611385  | Si | -1.552565 | -1.026010 | -1.442849 |
| C      | 5.431786  | -0.173219 | 0.497746  | H  | 2.755845  | 0.206971  | -1.874020 |
| C      | 5.402451  | -0.651791 | -1.793409 | H  | -0.190891 | -0.595060 | -1.831446 |
| C      | 4.725305  | -0.143381 | -0.696841 | C  | -1.724752 | -2.843498 | -1.883663 |
| C      | 2.317478  | -0.585270 | 0.258427  | C  | -0.581707 | -3.562727 | -2.249382 |
| C      | 1.372420  | -2.812368 | 0.664767  | C  | -2.950785 | -3.525635 | -1.869611 |
| F      | 4.830828  | -0.679233 | -3.006488 | C  | -0.655664 | -4.914634 | -2.577579 |
| C      | 2.025179  | -1.886747 | -0.134083 | H  | 0.382952  | -3.067573 | -2.273062 |
| B      | 3.180504  | 0.375133  | -0.759677 | C  | -3.033093 | -4.872404 | -2.202431 |
| F      | 1.121945  | -4.050879 | 0.229487  | H  | -3.859236 | -3.006888 | -1.577810 |
| F      | 2.403148  | -2.315248 | -1.352511 | C  | -1.880183 | -5.570340 | -2.556676 |
| C      | 2.973198  | 1.955352  | -0.402856 | H  | 0.245488  | -5.452326 | -2.847555 |
| F      | 5.226645  | 2.583555  | 0.025226  | H  | -3.990742 | -5.379505 | -2.183074 |
| F      | 0.673427  | 1.616264  | -0.798282 | H  | -1.939792 | -6.621422 | -2.813443 |
| C      | 3.924352  | 2.900486  | -0.052436 | C  | -3.983204 | 1.667407  | -3.436344 |
| C      | 1.677774  | 2.448470  | -0.457236 | C  | -4.378145 | 2.967855  | -3.766005 |
| C      | 3.614077  | 4.222542  | 0.246297  | C  | -2.917033 | 1.393694  | -2.547065 |
| C      | 1.316306  | 3.746088  | -0.156238 | C  | -3.662634 | 4.008785  | -3.200360 |
| F      | 4.575424  | 5.086100  | 0.583410  | H  | -5.202731 | 3.153488  | -4.444301 |
| F      | 0.031280  | 4.126863  | -0.198162 | C  | -2.197840 | 2.474502  | -2.011661 |
| C      | 2.301208  | 4.651709  | 0.199586  | C  | -2.575505 | 3.764449  | -2.339473 |
| F      | 0.398506  | -3.327378 | 2.749809  | H  | -3.933539 | 5.030588  | -3.437014 |
| F      | 1.987576  | 5.914187  | 0.491590  | H  | -1.339758 | 2.307314  | -1.374577 |
| F      | 8.596697  | -1.642350 | -0.417203 | H  | -2.018003 | 4.599771  | -1.933417 |
| C      | -1.884996 | -0.955021 | 2.697067  | C  | -2.814506 | -0.045887 | -2.415007 |
| C      | -2.088608 | -1.532960 | 3.952859  | C  | -3.801891 | -0.545716 | -3.238176 |
| C      | -2.075849 | -1.656965 | 1.481847  | N  | -4.509505 | 0.461965  | -3.841472 |
| C      | -2.530390 | -2.841430 | 3.983847  | C  | -5.601795 | 0.306764  | -4.784263 |
| H      | -1.914828 | -0.970148 | 4.862559  | H  | -6.503526 | 0.792358  | -4.405969 |
| C      | -2.500603 | -2.997241 | 1.553234  | H  | -5.335690 | 0.745577  | -5.747239 |
| C      | -2.738546 | -3.564182 | 2.792662  | H  | -5.799077 | -0.754507 | -4.919890 |
| H      | -2.704425 | -3.325354 | 4.937266  | H  | -4.045249 | -1.573250 | -3.469534 |
| H      | -2.623933 | -3.585606 | 0.652469  | H  | -6.686361 | 0.901566  | -0.375829 |
|        |           |           |           | H  | -5.908553 | 3.153059  | 0.057326  |

|   |           |           |           |
|---|-----------|-----------|-----------|
| C | -5.058285 | 1.904538  | 1.630204  |
| C | -4.941248 | 0.523186  | 1.684272  |
| C | -4.851918 | -0.205856 | 2.850688  |
| C | -4.880953 | 0.523868  | 4.039606  |
| C | -4.989442 | 1.912426  | 4.021639  |
| C | -5.075195 | 2.616729  | 2.819579  |
| C | -5.177100 | 2.358232  | 0.195165  |
| C | -5.614313 | 1.064877  | -0.494270 |
| H | -4.754791 | -1.285948 | 2.857175  |
| H | -4.815082 | -0.002222 | 4.983730  |
| H | -5.170705 | 3.695607  | 2.816132  |
| H | -4.213194 | 2.700768  | -0.194609 |
| N | -4.939872 | -0.020880 | 0.311635  |
| C | -5.560897 | -1.360021 | 0.145985  |
| H | -4.939862 | -2.099139 | 0.650507  |
| H | -6.559172 | -1.332514 | 0.579094  |
| H | -5.612388 | -1.571667 | -0.921507 |
| H | -5.014656 | 2.454839  | 4.958919  |
| H | -5.325210 | 0.961102  | -1.535710 |

#### Si2-9

| Symbol | X         | Y         | Z         |
|--------|-----------|-----------|-----------|
| F      | -6.048037 | -0.516612 | 2.538895  |
| F      | -4.307900 | 3.807436  | -1.982806 |
| F      | -4.526748 | -0.574464 | 0.310487  |
| C      | -4.759330 | -0.196679 | 2.600873  |
| C      | -2.534823 | 2.852662  | -3.188801 |
| C      | -3.337529 | 2.900794  | -2.064497 |
| C      | -3.962500 | -0.224074 | 1.472511  |
| C      | -4.196357 | 0.174429  | 3.812639  |
| F      | -0.677948 | 1.921947  | -4.296766 |
| C      | -1.502474 | 1.932177  | -3.252469 |
| F      | -3.909372 | 2.154970  | 0.043881  |
| C      | -3.108035 | 2.021916  | -1.016030 |
| C      | -1.308052 | 1.077548  | -2.187707 |
| C      | -2.102003 | 1.064442  | -1.047684 |
| C      | -2.616521 | 0.112524  | 1.488916  |
| C      | -2.855264 | 0.507353  | 3.874831  |
| F      | -0.266322 | 0.236589  | -2.258793 |
| C      | -2.092168 | 0.468010  | 2.718378  |
| B      | -1.815406 | -0.014950 | 0.103009  |
| F      | -2.310078 | 0.857099  | 5.036694  |
| F      | -0.791793 | 0.782010  | 2.833307  |
| C      | -1.604962 | -1.558866 | -0.321385 |

|    |           |           |           |
|----|-----------|-----------|-----------|
| F  | -2.529978 | -1.370994 | -2.497030 |
| F  | -0.630677 | -1.971728 | 1.789536  |
| C  | -1.954154 | -2.111265 | -1.546423 |
| C  | -1.040157 | -2.436743 | 0.598372  |
| C  | -1.727116 | -3.442976 | -1.854356 |
| C  | -0.823654 | -3.774260 | 0.334571  |
| F  | -2.037739 | -3.922998 | -3.054472 |
| F  | -0.244937 | -4.566137 | 1.235346  |
| C  | -1.159583 | -4.277760 | -0.909153 |
| F  | -4.942117 | 0.207342  | 4.909948  |
| F  | -0.920549 | -5.548899 | -1.197477 |
| F  | -2.723278 | 3.712970  | -4.180714 |
| C  | 2.137009  | -2.888590 | -0.207304 |
| C  | 2.130021  | -4.214592 | -0.652537 |
| C  | 1.943460  | -1.785443 | -1.074046 |
| C  | 1.904169  | -4.426862 | -2.000930 |
| H  | 2.274569  | -5.041053 | 0.033408  |
| C  | 1.714040  | -2.038916 | -2.436387 |
| C  | 1.692567  | -3.348930 | -2.882469 |
| H  | 1.880500  | -5.439743 | -2.384374 |
| H  | 1.549034  | -1.219453 | -3.125585 |
| H  | 1.510141  | -3.553516 | -3.930601 |
| C  | 2.053777  | -0.579112 | -0.274893 |
| C  | 2.292500  | -1.031472 | 1.008383  |
| H  | -0.320933 | -0.034838 | 0.297932  |
| N  | 2.329542  | -2.393814 | 1.064107  |
| C  | 2.546632  | -3.197006 | 2.253458  |
| H  | 1.660125  | -3.789541 | 2.480655  |
| H  | 3.400259  | -3.860395 | 2.103724  |
| H  | 2.758490  | -2.530727 | 3.087202  |
| H  | 2.492164  | -0.462264 | 1.906421  |
| Si | 2.468541  | 1.146869  | -0.850934 |
| H  | -0.570295 | 0.639116  | 0.615222  |
| H  | 2.588830  | 1.118925  | -2.329790 |
| C  | 1.186945  | 2.464195  | -0.429708 |
| C  | 0.686559  | 3.332202  | -1.406216 |
| C  | 0.696340  | 2.597165  | 0.877949  |
| C  | -0.290273 | 4.277956  | -1.097482 |
| H  | 1.052502  | 3.261896  | -2.426931 |
| C  | -0.303377 | 3.514667  | 1.187181  |
| H  | 1.087007  | 1.961928  | 1.669084  |
| C  | -0.800074 | 4.356831  | 0.193855  |
| H  | -0.665168 | 4.940788  | -1.869767 |
| H  | -0.686936 | 3.577257  | 2.199139  |

|   |           |           |           |
|---|-----------|-----------|-----------|
| H | -1.579475 | 5.072788  | 0.427811  |
| C | 6.134595  | 1.617887  | 0.969748  |
| C | 7.373751  | 1.139793  | 1.404900  |
| C | 5.197863  | 0.803838  | 0.290009  |
| C | 7.666457  | -0.188026 | 1.145325  |
| H | 8.077108  | 1.780921  | 1.923464  |
| C | 5.525785  | -0.539192 | 0.042491  |
| C | 6.751598  | -1.018775 | 0.470811  |
| H | 8.617387  | -0.595927 | 1.466572  |
| H | 4.828555  | -1.189356 | -0.476573 |
| H | 7.016620  | -2.052590 | 0.283731  |
| C | 4.042273  | 1.625720  | 0.003108  |
| C | 4.344557  | 2.864936  | 0.520666  |
| N | 5.586753  | 2.874659  | 1.095370  |
| C | 6.229249  | 3.998636  | 1.747264  |
| H | 6.434825  | 3.766271  | 2.794014  |
| H | 7.166344  | 4.245416  | 1.244605  |
| H | 5.564243  | 4.858459  | 1.698513  |
| H | 3.744282  | 3.764659  | 0.528904  |

#### Si2-TS1

| Symbol | X         | Y         | Z         |
|--------|-----------|-----------|-----------|
| F      | 3.632252  | -0.688185 | -3.425948 |
| F      | -2.962581 | -5.280109 | -1.023023 |
| F      | 1.103876  | 0.020967  | -3.215564 |
| C      | 2.877077  | -1.250963 | -2.479509 |
| C      | -3.818243 | -3.670223 | 0.460857  |
| C      | -2.906689 | -4.049778 | -0.509074 |
| C      | 1.547601  | -0.880256 | -2.325544 |
| C      | 3.425515  | -2.203946 | -1.644707 |
| F      | -4.629379 | -2.013508 | 1.921850  |
| C      | -3.760145 | -2.390039 | 0.980755  |
| F      | -1.103347 | -3.574363 | -1.884643 |
| C      | -1.949010 | -3.144976 | -0.936177 |
| C      | -2.791578 | -1.516279 | 0.514955  |
| C      | -1.841940 | -1.857059 | -0.435262 |
| C      | 0.716179  | -1.392965 | -1.336265 |
| C      | 2.627373  | -2.783654 | -0.674295 |
| F      | -2.796520 | -0.281244 | 1.049968  |
| C      | 1.304430  | -2.392090 | -0.560477 |
| B      | -0.726278 | -0.772661 | -0.888763 |
| F      | 3.139579  | -3.712271 | 0.135879  |
| F      | 0.584238  | -3.034782 | 0.368510  |
| C      | -1.361093 | 0.383272  | -1.851707 |

|    |           |           |           |
|----|-----------|-----------|-----------|
| F  | -3.302276 | -0.825315 | -2.509234 |
| F  | 0.494363  | 1.782132  | -1.433516 |
| C  | -2.582249 | 0.305795  | -2.507925 |
| C  | -0.722760 | 1.608155  | -1.987627 |
| C  | -3.141619 | 1.368748  | -3.207688 |
| C  | -1.238284 | 2.694545  | -2.664151 |
| F  | -4.323097 | 1.234207  | -3.811344 |
| F  | -0.564855 | 3.847959  | -2.720595 |
| C  | -2.473592 | 2.575904  | -3.278633 |
| F  | 4.699357  | -2.568433 | -1.780542 |
| F  | -3.001123 | 3.604887  | -3.936211 |
| F  | -4.745382 | -4.527737 | 0.884918  |
| C  | 3.953916  | 1.709963  | 0.172283  |
| C  | 4.675433  | 1.410418  | -0.985431 |
| C  | 3.988896  | 0.908341  | 1.329551  |
| C  | 5.491415  | 0.295427  | -0.941868 |
| H  | 4.600105  | 2.021615  | -1.876513 |
| C  | 4.858571  | -0.192357 | 1.355468  |
| C  | 5.597278  | -0.484272 | 0.224450  |
| H  | 6.063480  | 0.018433  | -1.818726 |
| H  | 4.968920  | -0.792324 | 2.250493  |
| H  | 6.265396  | -1.336268 | 0.229508  |
| C  | 3.039296  | 1.487933  | 2.262523  |
| C  | 2.617277  | 2.683029  | 1.664722  |
| H  | 2.950734  | 1.272767  | 3.318248  |
| N  | 3.115694  | 2.789293  | 0.421770  |
| C  | 2.837993  | 3.851119  | -0.536936 |
| H  | 3.779967  | 4.268686  | -0.892371 |
| H  | 2.268064  | 3.454682  | -1.378772 |
| H  | 2.262593  | 4.628569  | -0.038488 |
| H  | 1.960137  | 3.445884  | 2.057473  |
| Si | 0.936490  | 0.599441  | 1.480318  |
| H  | -0.463661 | -0.154422 | 0.175546  |
| H  | 1.596990  | 0.678656  | 0.182778  |
| C  | 0.893151  | -1.016439 | 2.406401  |
| C  | -0.348635 | -1.532377 | 2.807035  |
| C  | 2.033413  | -1.799036 | 2.608409  |
| C  | -0.439321 | -2.785933 | 3.399689  |
| H  | -1.254451 | -0.963568 | 2.632389  |
| C  | 1.945000  | -3.053094 | 3.200970  |
| H  | 2.997845  | -1.448835 | 2.269239  |
| C  | 0.708021  | -3.546948 | 3.599064  |
| H  | -1.408056 | -3.171864 | 3.695362  |
| H  | 2.839696  | -3.648898 | 3.335491  |



|   |           |           |           |
|---|-----------|-----------|-----------|
| H | 0.635126  | -4.528250 | 4.053135  |
| C | -1.676653 | 3.555296  | 2.646931  |
| C | -2.358995 | 4.766140  | 2.511149  |
| C | -0.785464 | 3.062065  | 1.666790  |
| C | -2.126503 | 5.500360  | 1.361419  |
| H | -3.043424 | 5.115856  | 3.274978  |
| C | -0.561601 | 3.840278  | 0.522431  |
| C | -1.232630 | 5.042405  | 0.377799  |
| H | -2.639631 | 6.443312  | 1.217701  |
| H | 0.121891  | 3.507700  | -0.245053 |
| H | -1.070412 | 5.635130  | -0.514583 |
| C | -0.278524 | 1.793321  | 2.150403  |
| C | -0.878819 | 1.615626  | 3.385117  |
| N | -1.707569 | 2.649107  | 3.685539  |
| C | -2.512365 | 2.789621  | 4.885613  |
| H | -2.255058 | 3.714549  | 5.404184  |
| H | -3.573029 | 2.800967  | 4.629689  |
| H | -2.312157 | 1.945579  | 5.541952  |
| H | -0.760119 | 0.806081  | 4.090947  |

#### Si2-TS2

| Symbol | X         | Y         | Z         |
|--------|-----------|-----------|-----------|
| Si     | -2.941436 | -0.582399 | -0.941057 |
| H      | 1.761591  | 0.598398  | 0.065341  |
| F      | 6.549138  | -0.226497 | -3.195396 |
| F      | 5.969815  | -1.152706 | 3.696806  |
| F      | 4.707726  | -1.521184 | -1.765910 |
| C      | 5.708430  | 0.461599  | -2.421048 |
| C      | 3.701577  | -0.973009 | 4.278428  |
| C      | 4.703630  | -0.957490 | 3.323741  |
| C      | 4.734276  | -0.184584 | -1.676575 |
| C      | 5.814372  | 1.840651  | -2.356448 |
| F      | 1.407990  | -0.803577 | 4.787320  |
| C      | 2.389333  | -0.789321 | 3.882026  |
| F      | 5.402491  | -0.778313 | 1.125742  |
| C      | 4.379722  | -0.746087 | 1.992200  |
| C      | 2.116584  | -0.585925 | 2.539701  |
| C      | 3.082262  | -0.533372 | 1.546500  |
| C      | 3.833624  | 0.479420  | -0.855690 |
| C      | 4.949417  | 2.547900  | -1.541447 |
| F      | 0.814883  | -0.437165 | 2.218481  |
| C      | 3.998371  | 1.856512  | -0.808223 |
| B      | 2.639245  | -0.225839 | 0.004475  |
| F      | 5.030926  | 3.879371  | -1.476727 |

|   |           |           |           |
|---|-----------|-----------|-----------|
| F | 3.185461  | 2.610706  | -0.039269 |
| C | 2.007915  | -1.549116 | -0.716709 |
| F | 3.520840  | -3.053454 | 0.309061  |
| F | 0.366279  | -0.269077 | -1.870397 |
| C | 2.465498  | -2.842229 | -0.490423 |
| C | 0.930377  | -1.467632 | -1.584545 |
| C | 1.889536  | -3.967230 | -1.055032 |
| C | 0.339110  | -2.560816 | -2.198307 |
| F | 2.344498  | -5.189601 | -0.771105 |
| F | -0.691753 | -2.405437 | -3.032542 |
| C | 0.818316  | -3.825590 | -1.920548 |
| F | 6.739941  | 2.478224  | -3.070750 |
| F | 0.254184  | -4.898693 | -2.470656 |
| F | 3.997137  | -1.170443 | 5.561960  |
| H | -2.422821 | -0.358515 | -2.315567 |
| C | -2.245195 | -2.183502 | -0.253302 |
| C | -1.324320 | -2.231729 | 0.796898  |
| C | -2.617749 | -3.389593 | -0.864487 |
| C | -0.765224 | -3.439566 | 1.207729  |
| H | -1.029079 | -1.323062 | 1.306199  |
| C | -2.069430 | -4.598793 | -0.453579 |
| H | -3.337971 | -3.383484 | -1.677725 |
| C | -1.134272 | -4.624042 | 0.579465  |
| H | -0.042263 | -3.450581 | 2.015924  |
| H | -2.360285 | -5.519934 | -0.944336 |
| H | -0.692242 | -5.564566 | 0.888226  |
| C | -2.306775 | 2.273972  | 1.961471  |
| C | -2.715154 | 3.141444  | 2.971562  |
| C | -3.200938 | 1.659075  | 1.064901  |
| C | -4.073195 | 3.396315  | 3.066835  |
| H | -2.004222 | 3.602198  | 3.646500  |
| C | -4.567227 | 1.944492  | 1.175801  |
| C | -4.986559 | 2.806166  | 2.177503  |
| H | -4.437249 | 4.062773  | 3.839121  |
| H | -5.281161 | 1.498344  | 0.494390  |
| H | -6.041682 | 3.028786  | 2.280328  |
| C | -2.400164 | 0.898968  | 0.097862  |
| C | -1.071329 | 1.098109  | 0.532966  |
| H | -2.401713 | 1.834585  | -1.054250 |
| N | -1.016241 | 1.906460  | 1.599408  |
| C | 0.192028  | 2.344419  | 2.287353  |
| H | 0.143738  | 3.422049  | 2.438934  |
| H | 0.275678  | 1.834154  | 3.248036  |
| H | 1.054463  | 2.104324  | 1.666159  |



|    |           |           |           |
|----|-----------|-----------|-----------|
| N  | 1.597062  | 0.108255  | -2.224421 |
| C  | 1.105329  | 1.009489  | -3.257950 |
| H  | 1.678058  | 0.865973  | -4.173377 |
| H  | 0.048934  | 0.799233  | -3.436768 |
| H  | 1.218326  | 2.033819  | -2.909241 |
| H  | 1.997916  | 1.495774  | -0.724100 |
| Si | 1.618054  | -0.716055 | 1.594361  |
| H  | -2.170470 | 0.460371  | 1.516753  |
| H  | 0.152088  | -0.522732 | 1.542067  |
| C  | 1.975121  | -2.438184 | 2.230372  |
| C  | 0.933055  | -3.368827 | 2.310232  |
| C  | 3.280937  | -2.882481 | 2.476419  |
| C  | 1.189300  | -4.705258 | 2.606419  |
| H  | -0.088129 | -3.054318 | 2.125858  |
| C  | 3.542604  | -4.214345 | 2.778406  |
| H  | 4.108675  | -2.182793 | 2.421514  |
| C  | 2.493691  | -5.129774 | 2.836245  |
| H  | 0.370037  | -5.412991 | 2.651616  |
| H  | 4.559460  | -4.540619 | 2.963465  |
| H  | 2.694725  | -6.170294 | 3.062368  |
| C  | 3.535375  | 2.569457  | 3.137917  |
| C  | 3.863546  | 3.928742  | 3.117850  |
| C  | 2.533427  | 2.015918  | 2.307740  |
| C  | 3.152347  | 4.740257  | 2.251555  |
| H  | 4.638216  | 4.332515  | 3.759104  |
| C  | 1.799267  | 2.876607  | 1.474917  |
| C  | 2.120503  | 4.221671  | 1.445018  |
| H  | 3.379050  | 5.798510  | 2.207218  |
| H  | 0.976199  | 2.496632  | 0.880389  |
| H  | 1.561424  | 4.889854  | 0.801013  |
| C  | 2.497211  | 0.592820  | 2.563278  |
| C  | 3.433676  | 0.382863  | 3.552071  |
| N  | 4.061585  | 1.549363  | 3.897398  |
| C  | 5.082021  | 1.714790  | 4.915694  |
| H  | 5.993535  | 2.122655  | 4.474941  |
| H  | 4.730317  | 2.386853  | 5.700196  |
| H  | 5.301958  | 0.742991  | 5.352587  |
| H  | 3.710183  | -0.536195 | 4.049245  |
| H  | 6.621532  | 0.653008  | 0.593883  |
| H  | 5.842310  | 2.790758  | -0.133544 |
| C  | 4.951299  | 1.460791  | -1.611435 |
| C  | 4.958327  | 0.069187  | -1.584096 |
| C  | 4.807202  | -0.705191 | -2.722646 |
| C  | 4.642338  | -0.033646 | -3.933595 |

|   |          |           |           |
|---|----------|-----------|-----------|
| C | 4.625245 | 1.359075  | -3.981662 |
| C | 4.780520 | 2.117788  | -2.820524 |
| C | 5.101056 | 1.995126  | -0.207317 |
| C | 5.531056 | 0.740839  | 0.570307  |
| H | 4.797242 | -1.788335 | -2.679921 |
| H | 4.521842 | -0.605715 | -4.845570 |
| H | 4.769824 | 3.200600  | -2.863591 |
| H | 4.152039 | 2.389581  | 0.168484  |
| N | 4.993669 | -0.401628 | -0.227539 |
| C | 5.670011 | -1.686468 | -0.005717 |
| H | 5.055189 | -2.495212 | -0.403646 |
| H | 6.649173 | -1.689146 | -0.491352 |
| H | 5.798855 | -1.835384 | 1.064690  |
| H | 4.493872 | 1.858837  | -4.933846 |
| H | 5.137049 | 0.692129  | 1.585273  |

#### Si2-TS4

| Symbol | X         | Y         | Z         |
|--------|-----------|-----------|-----------|
| F      | -5.354461 | -1.005012 | 3.413012  |
| F      | -4.403998 | 4.179618  | -0.601210 |
| F      | -4.406352 | -0.679134 | 0.912709  |
| C      | -4.078588 | -0.681258 | 3.219356  |
| C      | -2.763590 | 3.583415  | -2.170756 |
| C      | -3.470112 | 3.324009  | -1.013005 |
| C      | -3.570869 | -0.510208 | 1.944865  |
| C      | -3.237256 | -0.510374 | 4.307321  |
| F      | -1.067632 | 2.968402  | -3.677460 |
| C      | -1.778768 | 2.701632  | -2.585385 |
| F      | -3.891907 | 2.019999  | 0.848495  |
| C      | -3.178744 | 2.188208  | -0.270254 |
| C      | -1.519714 | 1.585544  | -1.819363 |
| C      | -2.202589 | 1.277651  | -0.648372 |
| C      | -2.251892 | -0.159739 | 1.694428  |
| C      | -1.911063 | -0.175134 | 4.102669  |
| F      | -0.536853 | 0.767281  | -2.231515 |
| C      | -1.444135 | -0.009223 | 2.807947  |
| B      | -1.780648 | -0.036287 | 0.161494  |
| F      | -1.096494 | -0.022631 | 5.144722  |
| F      | -0.140156 | 0.286606  | 2.671223  |
| C      | -1.797463 | -1.445214 | -0.599234 |
| F      | -3.020165 | -0.714522 | -2.496620 |
| F      | -0.559143 | -2.392704 | 1.173332  |
| C      | -2.399560 | -1.690614 | -1.826434 |
| C      | -1.204788 | -2.546872 | 0.006225  |

|    |           |           |           |
|----|-----------|-----------|-----------|
| C  | -2.394407 | -2.940470 | -2.425776 |
| C  | -1.200943 | -3.813377 | -0.545001 |
| F  | -2.958067 | -3.124420 | -3.617984 |
| F  | -0.621571 | -4.831625 | 0.086730  |
| C  | -1.787692 | -4.004671 | -1.783533 |
| F  | -3.701991 | -0.671896 | 5.541170  |
| F  | -1.748622 | -5.199405 | -2.359625 |
| F  | -2.992263 | 4.693486  | -2.862636 |
| C  | 1.955634  | -2.830498 | -0.528644 |
| C  | 1.934163  | -4.118560 | -1.065304 |
| C  | 1.626708  | -1.678954 | -1.273076 |
| C  | 1.539330  | -4.240916 | -2.385971 |
| H  | 2.194100  | -4.985311 | -0.470075 |
| C  | 1.228182  | -1.834021 | -2.608521 |
| C  | 1.184157  | -3.110021 | -3.145140 |
| H  | 1.495882  | -5.222542 | -2.841501 |
| H  | 0.952031  | -0.972043 | -3.203957 |
| H  | 0.869594  | -3.244846 | -4.173399 |
| C  | 1.786803  | -0.524279 | -0.393740 |
| C  | 2.206252  | -1.081516 | 0.818933  |
| H  | 0.162104  | -0.093553 | 0.108174  |
| N  | 2.286833  | -2.422562 | 0.753088  |
| C  | 2.612562  | -3.330286 | 1.838271  |
| H  | 1.799431  | -4.046626 | 1.967437  |
| H  | 3.539286  | -3.861104 | 1.615676  |
| H  | 2.736321  | -2.754580 | 2.752497  |
| H  | 2.473603  | -0.572059 | 1.735091  |
| Si | 2.426585  | 1.145094  | -0.978503 |
| H  | -0.459961 | 0.372012  | 0.391246  |
| H  | 2.576740  | 1.035589  | -2.450070 |
| C  | 1.332256  | 2.630058  | -0.637383 |
| C  | 1.156917  | 3.605486  | -1.626786 |
| C  | 0.694111  | 2.814614  | 0.596235  |
| C  | 0.356549  | 4.722080  | -1.400168 |
| H  | 1.636800  | 3.486007  | -2.593124 |
| C  | -0.127833 | 3.915359  | 0.819490  |
| H  | 0.827699  | 2.087868  | 1.393191  |
| C  | -0.298722 | 4.869206  | -0.181317 |
| H  | 0.224347  | 5.462353  | -2.181234 |
| H  | -0.633972 | 4.030216  | 1.771302  |
| H  | -0.942750 | 5.724637  | -0.010806 |
| C  | 6.095874  | 1.087305  | 0.878352  |
| C  | 7.265663  | 0.437759  | 1.281846  |
| C  | 5.094127  | 0.445123  | 0.114003  |

|   |          |           |           |
|---|----------|-----------|-----------|
| C | 7.418158 | -0.885284 | 0.903643  |
| H | 8.022631 | 0.946915  | 1.866883  |
| C | 5.280085 | -0.896221 | -0.256714 |
| C | 6.435750 | -1.546107 | 0.141646  |
| H | 8.311861 | -1.422513 | 1.197598  |
| H | 4.532520 | -1.414647 | -0.850890 |
| H | 6.593118 | -2.580523 | -0.139850 |
| C | 4.036436 | 1.406385  | -0.103767 |
| C | 4.453831 | 2.553212  | 0.532670  |
| N | 5.679612 | 2.378286  | 1.116266  |
| C | 6.421814 | 3.360643  | 1.882024  |
| H | 6.554981 | 3.022058  | 2.911431  |
| H | 7.401148 | 3.530886  | 1.431299  |
| H | 5.866279 | 4.296116  | 1.884500  |
| H | 3.949417 | 3.506123  | 0.617890  |

#### PhNMe<sub>2</sub>

| Symbol | X         | Y         | Z         |
|--------|-----------|-----------|-----------|
| C      | -0.186179 | -0.000015 | -0.083422 |
| C      | 0.544424  | -1.204849 | -0.036784 |
| C      | 0.544774  | 1.204758  | -0.040052 |
| C      | 1.931624  | -1.194660 | 0.020810  |
| H      | 0.030726  | -2.155879 | -0.045480 |
| C      | 1.931955  | 1.194400  | 0.017589  |
| H      | 0.031240  | 2.155848  | -0.052725 |
| C      | 2.643841  | -0.000193 | 0.045748  |
| H      | 2.459795  | -2.141112 | 0.052321  |
| H      | 2.460352  | 2.140812  | 0.046310  |
| H      | 3.725356  | -0.000271 | 0.092940  |
| N      | -1.566891 | 0.000427  | -0.178278 |
| C      | -2.277900 | 1.240631  | 0.073796  |
| H      | -3.346786 | 1.060060  | -0.020464 |
| H      | -2.077280 | 1.644406  | 1.075650  |
| H      | -2.006333 | 2.000622  | -0.662300 |
| C      | -2.278565 | -1.240451 | 0.067835  |
| H      | -3.346782 | -1.061208 | -0.036381 |
| H      | -1.999522 | -1.999527 | -0.666333 |
| H      | -2.086371 | -1.644469 | 1.071279  |

#### add2

| Symbol | X         | Y         | Z         |
|--------|-----------|-----------|-----------|
| F      | 3.325068  | -2.073519 | -2.510428 |
| F      | -1.844798 | -4.481684 | -0.806898 |
| F      | 1.056351  | -0.879220 | -1.893413 |

|   |           |           |           |
|---|-----------|-----------|-----------|
| C | 3.065054  | -1.791920 | -1.235812 |
| C | -3.148239 | -2.596375 | -1.320052 |
| C | -2.004801 | -3.159681 | -0.789147 |
| C | 1.883274  | -1.171304 | -0.878270 |
| C | 3.985531  | -2.117722 | -0.255708 |
| F | -4.416334 | -0.663922 | -1.729574 |
| C | -3.305582 | -1.225428 | -1.255770 |
| F | -0.008456 | -3.000166 | 0.331959  |
| C | -1.041029 | -2.341902 | -0.219981 |
| C | -2.315736 | -0.443473 | -0.683704 |
| C | -1.126804 | -0.950224 | -0.155830 |
| C | 1.518451  | -0.846091 | 0.432567  |
| C | 3.691781  | -1.803535 | 1.053904  |
| F | -2.599380 | 0.860701  | -0.638665 |
| C | 2.490626  | -1.178674 | 1.363957  |
| B | 0.067243  | -0.040173 | 0.542763  |
| F | 4.562896  | -2.092602 | 2.018766  |
| F | 2.337730  | -0.914715 | 2.675523  |
| C | 0.432463  | 1.383361  | -0.211517 |
| F | -0.797265 | 1.057079  | -2.239374 |
| F | 2.123812  | 1.794438  | 1.407496  |
| C | -0.003933 | 1.804300  | -1.469452 |
| C | 1.447738  | 2.187314  | 0.314175  |
| C | 0.402516  | 2.992790  | -2.062839 |
| C | 1.878886  | 3.379007  | -0.241274 |
| F | -0.078645 | 3.343607  | -3.253448 |
| F | 2.832496  | 4.097326  | 0.347306  |
| C | 1.332227  | 3.800095  | -1.438941 |
| F | 5.129715  | -2.713275 | -0.571940 |
| F | 1.728482  | 4.935466  | -2.000338 |
| F | -4.088958 | -3.360063 | -1.861867 |
| C | -1.902764 | 0.842605  | 2.034733  |
| C | -1.994642 | 2.200822  | 1.731871  |
| C | -3.062601 | 0.101840  | 2.231355  |
| C | -3.237739 | 2.807063  | 1.626351  |
| H | -1.111856 | 2.795689  | 1.546455  |
| C | -4.306251 | 0.717561  | 2.112305  |
| H | -3.031846 | -0.953287 | 2.459572  |
| C | -4.400635 | 2.068357  | 1.812608  |
| H | -3.291791 | 3.861467  | 1.386183  |
| H | -5.200981 | 0.125410  | 2.258740  |
| H | -5.370025 | 2.542309  | 1.723268  |
| N | -0.552155 | 0.214514  | 2.137001  |
| C | -0.650377 | -1.125716 | 2.804967  |

|   |           |           |          |
|---|-----------|-----------|----------|
| H | 0.352545  | -1.499845 | 2.970607 |
| H | -1.155893 | -1.004755 | 3.762556 |
| H | -1.201476 | -1.825348 | 2.187894 |
| C | 0.211978  | 1.074470  | 3.114405 |
| H | 1.186223  | 0.644385  | 3.294916 |
| H | 0.323364  | 2.081256  | 2.736234 |
| H | -0.370174 | 1.101703  | 4.035399 |

### N1-1

| Symbol | X         | Y         | Z         |
|--------|-----------|-----------|-----------|
| Si     | 0.630622  | 0.009676  | 2.656498  |
| H      | -0.124288 | 0.003150  | 1.307928  |
| H      | 0.195310  | -1.250562 | 3.282262  |
| F      | -4.559612 | 2.785529  | -1.095610 |
| F      | 3.312361  | 1.939829  | -2.704963 |
| F      | -3.262735 | 0.467044  | -1.170878 |
| C      | -3.328210 | 2.709617  | -0.599994 |
| C      | 3.589559  | -0.172280 | -1.717698 |
| C      | 2.805215  | 0.931075  | -2.001087 |
| C      | -2.631785 | 1.510037  | -0.623811 |
| C      | -2.733604 | 3.835254  | -0.059420 |
| F      | 3.805898  | -2.287525 | -0.715335 |
| C      | 3.058333  | -1.222834 | -0.988287 |
| F      | 0.802009  | 2.074773  | -1.859367 |
| C      | 1.498516  | 0.980304  | -1.539499 |
| C      | 1.756447  | -1.131298 | -0.538641 |
| C      | 0.927969  | -0.039382 | -0.785838 |
| C      | -1.339348 | 1.384460  | -0.129765 |
| C      | -1.445315 | 3.755441  | 0.446722  |
| F      | 1.303611  | -2.142242 | 0.214997  |
| C      | -0.784195 | 2.545281  | 0.393042  |
| B      | -0.523667 | 0.011487  | -0.134363 |
| F      | -0.865818 | 4.833256  | 0.965758  |
| F      | 0.467031  | 2.507975  | 0.880560  |
| C      | -1.399370 | -1.322118 | -0.095726 |
| F      | -0.490431 | -2.195259 | -2.097899 |
| F      | -2.446300 | -0.622769 | 1.899391  |
| C      | -1.334202 | -2.310134 | -1.067662 |
| C      | -2.319702 | -1.534697 | 0.922916  |
| C      | -2.127693 | -3.445118 | -1.034942 |
| C      | -3.121752 | -2.658610 | 0.997657  |
| F      | -2.036424 | -4.366165 | -1.989898 |
| F      | -3.980835 | -2.822717 | 1.999314  |
| C      | -3.025061 | -3.619200 | 0.004121  |

|   |           |           |           |
|---|-----------|-----------|-----------|
| F | -3.388050 | 4.987729  | -0.030007 |
| F | -3.789632 | -4.702365 | 0.050459  |
| F | 4.849798  | -0.219737 | -2.126472 |
| H | 0.101851  | 1.218880  | 3.307451  |
| C | 2.441057  | -0.001339 | 2.258023  |
| C | 3.161933  | -1.192792 | 2.421044  |
| C | 3.096079  | 1.115049  | 1.717382  |
| C | 4.497011  | -1.272289 | 2.040834  |
| H | 2.675872  | -2.070371 | 2.834083  |
| C | 4.427091  | 1.029980  | 1.325957  |
| H | 2.568818  | 2.053009  | 1.592128  |
| C | 5.125631  | -0.165066 | 1.480460  |
| H | 5.038927  | -2.201761 | 2.164496  |
| H | 4.918177  | 1.894440  | 0.894533  |
| H | 6.159479  | -0.231933 | 1.162773  |

**N1-2**

| Symbol | X         | Y         | Z         |
|--------|-----------|-----------|-----------|
| Si     | -0.732056 | 0.244429  | -1.579105 |
| H      | 0.556010  | 0.040237  | -0.684858 |
| H      | -0.514623 | -0.816687 | -2.574817 |
| F      | 5.416989  | 3.067350  | -0.337552 |
| F      | -0.625001 | 1.126304  | 4.667693  |
| F      | 4.434740  | 0.620818  | -0.034000 |
| C      | 4.106635  | 2.906447  | -0.173405 |
| C      | -1.240505 | -0.885496 | 3.624770  |
| C      | -0.472109 | 0.262764  | 3.665398  |
| C      | 3.566326  | 1.637511  | -0.018003 |
| C      | 3.275228  | 4.010816  | -0.156590 |
| F      | -1.796845 | -2.900661 | 2.550006  |
| C      | -1.070279 | -1.786636 | 2.587143  |
| F      | 1.161916  | 1.633112  | 2.778102  |
| C      | 0.448356  | 0.508349  | 2.657241  |
| C      | -0.152789 | -1.498400 | 1.596052  |
| C      | 0.629571  | -0.346706 | 1.577504  |
| C      | 2.207228  | 1.416334  | 0.160296  |
| C      | 1.911969  | 3.838745  | 0.025253  |
| F      | -0.057342 | -2.372972 | 0.584298  |
| C      | 1.418288  | 2.559448  | 0.185026  |
| B      | 1.545911  | -0.038975 | 0.302836  |
| F      | 1.105249  | 4.896099  | 0.049412  |
| F      | 0.093503  | 2.434623  | 0.378334  |
| C      | 2.396554  | -1.239170 | -0.332248 |
| F      | 2.646667  | -2.418671 | 1.702991  |

|   |           |           |           |
|---|-----------|-----------|-----------|
| F | 2.284924  | -0.212623 | -2.453612 |
| C | 2.889962  | -2.313357 | 0.391992  |
| C | 2.716071  | -1.225719 | -1.683141 |
| C | 3.654611  | -3.316152 | -0.182468 |
| C | 3.467745  | -2.210148 | -2.297467 |
| F | 4.112472  | -4.327103 | 0.552042  |
| F | 3.742585  | -2.152728 | -3.598164 |
| C | 3.944070  | -3.263424 | -1.534781 |
| F | 3.777276  | 5.229619  | -0.308649 |
| F | 4.674696  | -4.217675 | -2.099073 |
| F | -2.142841 | -1.122944 | 4.568979  |
| H | -0.478190 | 1.614792  | -2.038372 |
| C | -2.111526 | -0.109590 | -0.406298 |
| C | -2.688707 | -1.385893 | -0.427530 |
| C | -2.553928 | 0.816959  | 0.547553  |
| C | -3.676904 | -1.733475 | 0.485946  |
| H | -2.358156 | -2.118777 | -1.156260 |
| C | -3.541429 | 0.468406  | 1.461651  |
| H | -2.129773 | 1.813941  | 0.579799  |
| C | -4.102694 | -0.806409 | 1.431512  |
| H | -4.101545 | -2.730044 | 0.469469  |
| H | -3.871701 | 1.189254  | 2.201091  |
| H | -4.867796 | -1.077844 | 2.150152  |
| C | -5.131964 | 0.372631  | -1.983775 |
| C | -4.569269 | 1.669020  | -1.981483 |
| C | -4.589005 | -0.574527 | -2.881282 |
| C | -3.489764 | 1.973454  | -2.793024 |
| H | -4.964780 | 2.433638  | -1.327408 |
| C | -3.508151 | -0.250655 | -3.685523 |
| H | -5.004278 | -1.571203 | -2.939770 |
| C | -2.932104 | 1.018501  | -3.644848 |
| H | -3.073387 | 2.974409  | -2.758039 |
| H | -3.109454 | -1.002873 | -4.357641 |
| H | -2.102681 | 1.272137  | -4.294370 |
| N | -6.162205 | 0.044639  | -1.143865 |
| C | -6.757621 | -1.273769 | -1.216581 |
| H | -7.523734 | -1.361543 | -0.449391 |
| H | -7.221726 | -1.462046 | -2.192266 |
| H | -6.007915 | -2.050680 | -1.036007 |
| C | -6.756805 | 1.060301  | -0.298351 |
| H | -7.545027 | 0.607019  | 0.298480  |
| H | -6.015499 | 1.486129  | 0.385430  |
| H | -7.194330 | 1.876627  | -0.885381 |

**N1-3**

| Symbol | X         | Y         | Z         |
|--------|-----------|-----------|-----------|
| Si     | -1.611254 | 0.145268  | -2.204888 |
| H      | 0.496484  | 0.095546  | -0.856907 |
| H      | -1.006253 | -1.027944 | -2.857225 |
| F      | 5.420259  | 3.107290  | -0.014502 |
| F      | -0.243301 | 1.098639  | 4.622902  |
| F      | 4.353678  | 0.687857  | 0.187096  |
| C      | 4.095737  | 2.966363  | -0.104299 |
| C      | -0.840991 | -0.963774 | 3.669997  |
| C      | -0.166701 | 0.238728  | 3.602384  |
| C      | 3.508023  | 1.711345  | -0.014035 |
| C      | 3.299145  | 4.081208  | -0.279696 |
| F      | -1.422489 | -3.002419 | 2.653884  |
| C      | -0.761925 | -1.842032 | 2.603685  |
| F      | 1.195034  | 1.741044  | 2.495632  |
| C      | 0.572469  | 0.549396  | 2.467995  |
| C      | -0.030394 | -1.483689 | 1.487170  |
| C      | 0.667845  | -0.286627 | 1.366097  |
| C      | 2.140685  | 1.499340  | -0.100522 |
| C      | 1.925193  | 3.924506  | -0.352519 |
| F      | -0.027575 | -2.362244 | 0.468974  |
| C      | 1.386877  | 2.654490  | -0.257926 |
| B      | 1.400975  | 0.046725  | -0.051100 |
| F      | 1.142745  | 4.996948  | -0.504048 |
| F      | 0.042371  | 2.575184  | -0.291357 |
| C      | 2.378923  | -1.156810 | -0.548887 |
| F      | 3.149585  | -1.708496 | 1.618698  |
| F      | 1.802277  | -0.758858 | -2.812590 |
| C      | 3.142251  | -1.947364 | 0.297570  |
| C      | 2.483317  | -1.469598 | -1.894947 |
| C      | 3.938568  | -2.990642 | -0.143163 |
| C      | 3.269500  | -2.502528 | -2.383168 |
| F      | 4.650483  | -3.724149 | 0.716728  |
| F      | 3.328829  | -2.763286 | -3.692672 |
| C      | 4.001350  | -3.271369 | -1.497404 |
| F      | 3.843216  | 5.294967  | -0.364835 |
| F      | 4.764561  | -4.269850 | -1.943110 |
| F      | -1.586626 | -1.266010 | 4.735057  |
| H      | -0.832949 | 1.384828  | -2.317175 |
| C      | -2.344687 | -0.231787 | -0.538810 |
| C      | -2.854594 | -1.511285 | -0.284138 |
| C      | -2.504683 | 0.758722  | 0.440090  |
| C      | -3.527911 | -1.790629 | 0.900426  |

|   |           |           |           |
|---|-----------|-----------|-----------|
| H | -2.722186 | -2.302902 | -1.015040 |
| C | -3.174871 | 0.481147  | 1.627265  |
| H | -2.095989 | 1.750648  | 0.278739  |
| C | -3.699918 | -0.789399 | 1.851919  |
| H | -3.903775 | -2.789558 | 1.087570  |
| H | -3.282145 | 1.253451  | 2.380935  |
| H | -4.214981 | -1.006878 | 2.781039  |
| C | -5.380602 | 0.363127  | -1.596096 |
| C | -4.788020 | 1.648767  | -1.868110 |
| C | -5.077624 | -0.720536 | -2.497151 |
| C | -3.766731 | 1.745774  | -2.752346 |
| H | -5.143991 | 2.529467  | -1.354317 |
| C | -4.044375 | -0.604965 | -3.365675 |
| H | -5.651741 | -1.634494 | -2.457954 |
| C | -3.207077 | 0.575922  | -3.399492 |
| H | -3.301313 | 2.709302  | -2.929242 |
| H | -3.791497 | -1.439112 | -4.010957 |
| H | -2.682279 | 0.757970  | -4.337626 |
| N | -6.190655 | 0.188194  | -0.564005 |
| C | -6.822310 | -1.110654 | -0.319504 |
| H | -7.312086 | -1.081964 | 0.648883  |
| H | -7.567109 | -1.330449 | -1.087399 |
| H | -6.065934 | -1.895942 | -0.303736 |
| C | -6.491433 | 1.295237  | 0.347136  |
| H | -7.013769 | 0.900208  | 1.213182  |
| H | -5.563969 | 1.760973  | 0.682788  |
| H | -7.124898 | 2.040256  | -0.139388 |

**N1-4**

| Symbol | X        | Y         | Z         |
|--------|----------|-----------|-----------|
| F      | 3.275803 | 4.570197  | -1.287859 |
| F      | 5.439019 | -1.550769 | -1.427068 |
| F      | 2.123234 | 2.188889  | -1.784857 |
| C      | 2.841518 | 3.810277  | -0.279124 |
| C      | 3.526102 | -2.898543 | -1.622732 |
| C      | 4.120888 | -1.701851 | -1.274960 |
| C      | 2.240334 | 2.586435  | -0.506956 |
| C      | 2.994635 | 4.249329  | 1.026573  |
| F      | 1.567665 | -4.192986 | -1.776255 |
| C      | 2.158722 | -3.036707 | -1.462458 |
| F      | 4.028273 | 0.446024  | -0.448601 |
| C      | 3.345698 | -0.666161 | -0.766894 |
| C      | 1.433317 | -1.981714 | -0.943831 |
| C      | 1.972063 | -0.754137 | -0.578534 |

|    |           |           |           |
|----|-----------|-----------|-----------|
| C  | 1.781922  | 1.754341  | 0.503446  |
| C  | 2.547114  | 3.458369  | 2.068144  |
| F  | 0.115954  | -2.199246 | -0.781831 |
| C  | 1.951736  | 2.235002  | 1.790069  |
| B  | 1.022057  | 0.354589  | 0.157169  |
| F  | 2.688758  | 3.882434  | 3.327388  |
| F  | 1.532279  | 1.526923  | 2.851199  |
| C  | -0.345525 | 0.782902  | -0.649030 |
| F  | 0.088670  | -0.268199 | -2.732463 |
| F  | -1.022467 | 1.937426  | 1.305229  |
| C  | -0.706795 | 0.477525  | -1.953717 |
| C  | -1.255437 | 1.594769  | 0.025881  |
| C  | -1.889707 | 0.911219  | -2.541672 |
| C  | -2.425634 | 2.078123  | -0.530665 |
| F  | -2.208554 | 0.554133  | -3.788370 |
| F  | -3.266416 | 2.848005  | 0.169241  |
| C  | -2.750520 | 1.723910  | -1.828001 |
| F  | 3.569075  | 5.426574  | 1.274661  |
| F  | -3.897147 | 2.147730  | -2.368968 |
| F  | 4.255310  | -3.906924 | -2.100500 |
| H  | -1.250181 | -0.483397 | 1.936339  |
| Si | -2.126022 | -2.352441 | 3.072607  |
| H  | 0.665387  | -0.149339 | 1.198382  |
| H  | -3.377890 | -3.134758 | 3.025795  |
| C  | -0.661668 | -3.312296 | 2.438388  |
| C  | -0.828283 | -4.494395 | 1.706967  |
| C  | 0.628600  | -2.781879 | 2.576111  |
| C  | 0.265397  | -5.130303 | 1.128054  |
| H  | -1.819105 | -4.919439 | 1.579450  |
| C  | 1.722550  | -3.417678 | 1.999785  |
| H  | 0.786630  | -1.860464 | 3.129095  |
| C  | 1.539575  | -4.592553 | 1.275972  |
| H  | 0.124115  | -6.039973 | 0.557056  |
| H  | 2.713609  | -2.990893 | 2.103882  |
| H  | 2.389787  | -5.083066 | 0.815601  |
| H  | -1.897858 | -1.735643 | 4.394278  |
| C  | -4.515122 | -0.149001 | 0.164742  |
| C  | -4.356899 | 0.422530  | 1.482400  |
| C  | -3.581438 | -1.160564 | -0.258251 |
| C  | -3.280410 | 0.112516  | 2.237261  |
| H  | -5.072981 | 1.146156  | 1.842358  |
| C  | -2.496562 | -1.439623 | 0.496950  |
| H  | -3.700107 | -1.643044 | -1.217083 |
| C  | -2.278873 | -0.859353 | 1.816623  |

|   |           |           |           |
|---|-----------|-----------|-----------|
| H | -3.148814 | 0.602687  | 3.196019  |
| H | -1.762314 | -2.144990 | 0.129192  |
| N | -5.465067 | 0.275632  | -0.650983 |
| C | -5.631188 | -0.322896 | -1.980793 |
| H | -4.736157 | -0.168950 | -2.586386 |
| H | -5.833896 | -1.390756 | -1.893505 |
| H | -6.470630 | 0.155261  | -2.474233 |
| C | -6.337872 | 1.394222  | -0.274414 |
| H | -6.953962 | 1.653807  | -1.128935 |
| H | -6.985791 | 1.115352  | 0.558083  |
| H | -5.734909 | 2.260456  | -0.001351 |

### N1-5

| Symbol | X         | Y         | Z         |
|--------|-----------|-----------|-----------|
| F      | 2.209794  | 4.932505  | -1.723947 |
| F      | 5.137208  | -0.926910 | -1.955954 |
| F      | 1.368648  | 2.408841  | -2.189135 |
| C      | 1.916742  | 4.127133  | -0.707814 |
| C      | 3.447326  | -2.548892 | -1.813521 |
| C      | 3.876929  | -1.243143 | -1.671730 |
| C      | 1.479338  | 2.834813  | -0.924530 |
| C      | 2.052117  | 4.580378  | 0.595596  |
| F      | 1.733201  | -4.140775 | -1.582306 |
| C      | 2.140689  | -2.878479 | -1.495868 |
| F      | 3.502239  | 0.951635  | -1.068185 |
| C      | 2.998450  | -0.277278 | -1.203473 |
| C      | 1.293267  | -1.888513 | -1.043212 |
| C      | 1.674410  | -0.559509 | -0.885120 |
| C      | 1.173941  | 1.956796  | 0.104844  |
| C      | 1.749965  | 3.739433  | 1.651605  |
| F      | 0.045797  | -2.249929 | -0.726820 |
| C      | 1.316332  | 2.449102  | 1.389700  |
| B      | 0.627555  | 0.509778  | -0.314721 |
| F      | 1.871061  | 4.174497  | 2.902295  |
| F      | 1.015726  | 1.680594  | 2.448031  |
| C      | -0.865715 | 0.570190  | -0.906338 |
| F      | -0.422916 | -0.677330 | -2.873694 |
| F      | -1.531245 | 1.832481  | 0.971776  |
| C      | -1.275829 | 0.003119  | -2.105326 |
| C      | -1.836817 | 1.290216  | -0.213789 |
| C      | -2.574748 | 0.121959  | -2.577089 |
| C      | -3.128862 | 1.456088  | -0.670609 |
| F      | -2.937969 | -0.464078 | -3.715938 |
| F      | -4.022359 | 2.139091  | 0.038546  |



|    |           |           |           |
|----|-----------|-----------|-----------|
| C  | -3.502919 | 0.854989  | -1.859276 |
| F  | 2.469103  | 5.818511  | 0.828293  |
| F  | -4.748710 | 0.964603  | -2.300018 |
| F  | 4.291833  | -3.489824 | -2.213029 |
| H  | -0.055844 | -0.094793 | 0.970363  |
| Si | -0.345446 | -1.657427 | 3.663204  |
| H  | 0.709527  | -0.177793 | 1.080725  |
| H  | -0.679681 | -2.715256 | 4.648214  |
| C  | 1.207648  | -2.199500 | 2.742177  |
| C  | 1.312506  | -3.492430 | 2.206477  |
| C  | 2.304749  | -1.338322 | 2.595771  |
| C  | 2.466039  | -3.908667 | 1.550301  |
| H  | 0.491711  | -4.194641 | 2.318494  |
| C  | 3.459574  | -1.746991 | 1.930023  |
| H  | 2.265589  | -0.338208 | 3.016967  |
| C  | 3.542620  | -3.035053 | 1.412582  |
| H  | 2.527368  | -4.913062 | 1.147930  |
| H  | 4.295607  | -1.064139 | 1.827902  |
| H  | 4.444254  | -3.360908 | 0.905345  |
| H  | -0.052671 | -0.393810 | 4.381392  |
| C  | -4.076796 | -1.057387 | 0.820235  |
| C  | -3.891405 | -0.263589 | 1.973811  |
| C  | -3.087814 | -2.020872 | 0.530851  |
| C  | -2.767398 | -0.417397 | 2.768684  |
| H  | -4.620443 | 0.488697  | 2.241079  |
| C  | -1.984244 | -2.172418 | 1.357158  |
| H  | -3.183712 | -2.667097 | -0.330896 |
| C  | -1.779578 | -1.374972 | 2.491698  |
| H  | -2.661940 | 0.232252  | 3.632591  |
| H  | -1.264158 | -2.942148 | 1.101068  |
| N  | -5.157051 | -0.867896 | -0.011339 |
| C  | -5.373570 | -1.796433 | -1.106813 |
| H  | -4.523433 | -1.789475 | -1.795843 |
| H  | -5.524236 | -2.826027 | -0.759639 |
| H  | -6.251859 | -1.482771 | -1.665924 |
| C  | -6.293758 | -0.091784 | 0.459605  |
| H  | -7.045482 | -0.063130 | -0.325915 |
| H  | -6.742851 | -0.524932 | 1.361660  |
| H  | -6.001759 | 0.936852  | 0.673736  |

#### N1-6

| Symbol | X        | Y        | Z        |
|--------|----------|----------|----------|
| Si     | 1.673286 | 1.112648 | 0.110415 |
| H      | 1.793222 | 2.535170 | 0.520837 |

|   |           |           |           |
|---|-----------|-----------|-----------|
| H | 2.396240  | 0.293139  | 1.117087  |
| C | 2.511681  | 0.812832  | -1.546773 |
| C | 1.852106  | 1.107294  | -2.747324 |
| C | 3.814631  | 0.305844  | -1.616464 |
| C | 2.475568  | 0.909803  | -3.975226 |
| H | 0.835337  | 1.488472  | -2.722759 |
| C | 4.443192  | 0.105468  | -2.842300 |
| H | 4.345894  | 0.057283  | -0.702692 |
| C | 3.773612  | 0.409023  | -4.023455 |
| H | 1.949880  | 1.144341  | -4.893636 |
| H | 5.451399  | -0.290893 | -2.876149 |
| H | 4.260090  | 0.251879  | -4.979234 |
| C | -2.910569 | 0.015395  | -0.152734 |
| C | -2.468583 | 1.145704  | 0.567789  |
| C | -1.926334 | -0.775064 | -0.787377 |
| C | -1.120851 | 1.464882  | 0.629357  |
| H | -3.180041 | 1.780499  | 1.077707  |
| C | -0.586328 | -0.433709 | -0.709728 |
| H | -2.209126 | -1.656374 | -1.346571 |
| C | -0.138958 | 0.691085  | -0.002350 |
| H | -0.831494 | 2.349265  | 1.189917  |
| H | 0.132615  | -1.066350 | -1.223782 |
| N | -4.243901 | -0.297634 | -0.241729 |
| C | -4.645194 | -1.553231 | -0.847566 |
| H | -4.338530 | -1.600513 | -1.896207 |
| H | -4.217515 | -2.418258 | -0.325678 |
| H | -5.729409 | -1.631620 | -0.814037 |
| C | -5.206876 | 0.448816  | 0.545253  |
| H | -6.203591 | 0.062111  | 0.345661  |
| H | -5.012099 | 0.369791  | 1.622150  |
| H | -5.198256 | 1.508100  | 0.273287  |

#### N1-7

| Symbol | X         | Y         | Z         |
|--------|-----------|-----------|-----------|
| Si     | -2.286593 | 1.432432  | -0.293212 |
| H      | 0.668317  | 0.082165  | 0.509547  |
| H      | -2.288316 | 2.378142  | -1.424508 |
| F      | 5.185035  | -3.577935 | 1.616661  |
| F      | -0.032732 | -4.695516 | -2.471961 |
| F      | 4.015674  | -2.084886 | -0.284698 |
| C      | 4.031944  | -2.953527 | 1.869522  |
| C      | -0.768039 | -2.599012 | -3.229917 |
| C      | 0.008705  | -3.362530 | -2.380760 |
| C      | 3.415010  | -2.168546 | 0.912565  |

|   |           |           |           |
|---|-----------|-----------|-----------|
| C | 3.432718  | -3.097032 | 3.110909  |
| F | -1.500467 | -0.466677 | -3.907139 |
| C | -0.735110 | -1.220811 | -3.113552 |
| F | 1.496801  | -3.573121 | -0.628172 |
| C | 0.794394  | -2.742209 | -1.418624 |
| C | 0.054213  | -0.651205 | -2.133478 |
| C | 0.836825  | -1.367720 | -1.238389 |
| C | 2.214772  | -1.504517 | 1.119885  |
| C | 2.233149  | -2.458945 | 3.364798  |
| F | -0.016436 | 0.692882  | -2.023486 |
| C | 1.652774  | -1.680266 | 2.373000  |
| B | 1.548844  | -0.552609 | -0.018274 |
| F | 1.648640  | -2.598375 | 4.559065  |
| F | 0.482996  | -1.095370 | 2.693654  |
| C | 2.651921  | 0.547339  | -0.511881 |
| F | 2.980286  | -0.263275 | -2.717970 |
| F | 2.535431  | 1.530145  | 1.636152  |
| C | 3.245803  | 0.640070  | -1.761868 |
| C | 3.044863  | 1.528494  | 0.388418  |
| C | 4.135013  | 1.647861  | -2.110501 |
| C | 3.919111  | 2.558016  | 0.085128  |
| F | 4.677936  | 1.687065  | -3.329928 |
| F | 4.222887  | 3.491700  | 0.989641  |
| C | 4.473620  | 2.615790  | -1.182102 |
| F | 4.006464  | -3.850349 | 4.049636  |
| F | 5.327075  | 3.588478  | -1.501599 |
| F | -1.564379 | -3.181585 | -4.127117 |
| H | -1.084037 | 1.420377  | 0.541613  |
| C | -2.778892 | -0.304524 | -0.743996 |
| C | -3.661108 | -0.578822 | -1.796446 |
| C | -2.259941 | -1.377805 | -0.005202 |
| C | -4.015465 | -1.888238 | -2.106236 |
| H | -4.064749 | 0.234143  | -2.392305 |
| C | -2.619595 | -2.687662 | -0.307368 |
| H | -1.547853 | -1.189703 | 0.794684  |
| C | -3.500290 | -2.942048 | -1.356078 |
| H | -4.682694 | -2.088095 | -2.936474 |
| H | -2.196143 | -3.509543 | 0.259288  |
| H | -3.765153 | -3.963552 | -1.604682 |
| C | -5.198610 | -0.234233 | 1.393686  |
| C | -4.163971 | 0.153047  | 2.320168  |
| C | -5.689478 | 0.764606  | 0.476010  |
| C | -3.478952 | 1.304617  | 2.116840  |
| H | -3.917563 | -0.483926 | 3.156995  |

|   |           |           |           |
|---|-----------|-----------|-----------|
| C | -4.979083 | 1.900298  | 0.277238  |
| H | -6.598844 | 0.588620  | -0.079484 |
| C | -3.719383 | 2.134876  | 0.953443  |
| H | -2.667344 | 1.585385  | 2.780028  |
| H | -5.322329 | 2.627825  | -0.450278 |
| H | -3.394305 | 3.172074  | 1.033203  |
| N | -5.687045 | -1.464317 | 1.387781  |
| C | -6.743773 | -1.844392 | 0.446814  |
| H | -6.893402 | -2.917947 | 0.506269  |
| H | -7.681866 | -1.342622 | 0.692836  |
| H | -6.444276 | -1.588068 | -0.570385 |
| C | -5.169476 | -2.477116 | 2.310700  |
| H | -5.567965 | -3.445332 | 2.023682  |
| H | -4.081154 | -2.515289 | 2.245855  |
| H | -5.469077 | -2.259184 | 3.338008  |
| C | -0.759126 | 4.187513  | 0.857336  |
| C | 0.368790  | 3.655183  | 0.206298  |
| C | -1.567898 | 5.083730  | 0.134666  |
| C | 0.634805  | 3.953291  | -1.122431 |
| H | 1.034888  | 2.993763  | 0.739199  |
| C | -1.282129 | 5.382195  | -1.193531 |
| H | -2.421635 | 5.556887  | 0.601945  |
| C | -0.190800 | 4.813231  | -1.840493 |
| H | 1.502400  | 3.502763  | -1.594226 |
| H | -1.926436 | 6.073556  | -1.724781 |
| H | 0.019731  | 5.045071  | -2.876910 |
| N | -1.093802 | 3.787349  | 2.153662  |
| C | -1.903523 | 4.702259  | 2.947776  |
| H | -2.042286 | 4.276615  | 3.940408  |
| H | -1.439207 | 5.691856  | 3.049035  |
| H | -2.895831 | 4.833671  | 2.510892  |
| C | -0.092632 | 3.032874  | 2.897888  |
| H | -0.494155 | 2.799286  | 3.883030  |
| H | 0.133184  | 2.089633  | 2.394619  |
| H | 0.848268  | 3.585802  | 3.023098  |

#### N1-8

| Symbol | X         | Y         | Z         |
|--------|-----------|-----------|-----------|
| Si     | 1.423758  | 1.164754  | 0.810504  |
| H      | -1.054676 | 0.271120  | 0.749075  |
| H      | 1.243136  | 0.137800  | -0.247884 |
| F      | -6.279814 | -2.421377 | 1.454332  |
| F      | -5.122134 | 3.728899  | -0.912321 |
| F      | -4.561413 | -1.452060 | -0.372190 |

C -5.161263 -1.804881 1.845680  
 C -3.120655 3.539340 -2.128348  
 C -4.000749 3.052566 -1.184812  
 C -4.255110 -1.306213 0.927376  
 C -4.899051 -1.654530 3.198140  
 F -1.091928 3.301807 -3.296150  
 C -1.959246 2.833665 -2.393546  
 F -4.615254 1.496421 0.406080  
 C -3.705092 1.874017 -0.510502  
 C -1.706965 1.668320 -1.697786  
 C -2.550386 1.139174 -0.725741  
 C -3.084442 -0.651158 1.279696  
 C -3.746290 -1.006299 3.599624  
 F -0.549479 1.044831 -1.981212  
 C -2.867241 -0.520248 2.640717  
 B -2.026816 -0.123427 0.159518  
 F -3.492643 -0.856467 4.903541  
 F -1.775125 0.108707 3.108857  
 C -1.543170 -1.419284 -0.712924  
 F -2.668771 -0.882794 -2.729578  
 F -0.333216 -2.189140 1.174266  
 C -1.884911 -1.711145 -2.024984  
 C -0.738392 -2.369946 -0.097202  
 C -1.456177 -2.849657 -2.693629  
 C -0.316221 -3.534685 -0.714073  
 F -1.805884 -3.071573 -3.962904  
 F 0.436536 -4.433112 -0.061832  
 C -0.669996 -3.772194 -2.030089  
 F -5.755392 -2.127660 4.104635  
 F -0.248781 -4.878027 -2.649767  
 F -3.366660 4.690432 -2.757870  
 H 0.982000 0.638848 2.124194  
 C 0.508769 2.757770 0.427840  
 C 0.960975 3.630457 -0.569163  
 C -0.662542 3.090485 1.119853  
 C 0.262349 4.794287 -0.874975  
 H 1.866204 3.401238 -1.123685  
 C -1.364507 4.253362 0.817381  
 H -1.043964 2.418761 1.883333  
 C -0.903180 5.106154 -0.181146  
 H 0.619937 5.451149 -1.659161  
 H -2.276361 4.489167 1.354480  
 H -1.456904 6.005704 -0.426065  
 C 6.141049 1.501688 1.186921

C 5.308378 1.412980 2.328277  
 C 5.501150 1.596033 -0.071575  
 C 3.928196 1.383065 2.199227  
 H 5.741304 1.370368 3.318300  
 C 4.115955 1.551497 -0.170825  
 H 6.085747 1.703216 -0.975516  
 C 3.282030 1.422189 0.951954  
 H 3.333728 1.306710 3.105538  
 H 3.679660 1.589873 -1.165744  
 H 4.270907 -0.568546 0.662973  
 N 7.502061 1.476000 1.294747  
 C 8.321365 1.660137 0.110089  
 H 9.369425 1.599402 0.391922  
 H 8.125370 0.877020 -0.628733  
 H 8.145088 2.632913 -0.362564  
 C 8.121933 1.504979 2.608210  
 H 9.202303 1.503876 2.488670  
 H 7.836768 2.398919 3.173645  
 H 7.846452 0.623723 3.195434  
 C 3.948481 -2.145534 -0.572024  
 C 3.091962 -3.227613 -0.682724  
 C 4.516380 -1.544998 -1.688954  
 C 2.788791 -3.711761 -1.953134  
 H 2.643104 -3.693113 0.182942  
 C 4.202148 -2.035553 -2.948915  
 H 5.186188 -0.700440 -1.577794  
 C 3.337336 -3.118088 -3.082101  
 H 2.115930 -4.554715 -2.049079  
 H 4.630974 -1.567164 -3.825522  
 H 3.088990 -3.495458 -4.066046  
 N 4.311109 -1.595299 0.756093  
 C 5.715368 -1.955932 1.137557  
 H 5.923706 -1.515023 2.110787  
 H 5.784459 -3.041535 1.174991  
 H 6.394950 -1.553663 0.388944  
 C 3.355623 -1.942321 1.850950  
 H 3.617055 -1.336310 2.715223  
 H 2.340447 -1.720869 1.523261  
 H 3.461054 -2.998031 2.090637

**N1-9**

| Symbol | X         | Y        | Z         |
|--------|-----------|----------|-----------|
| H      | -0.053446 | 0.010873 | 1.344072  |
| F      | -3.660869 | 3.001262 | -2.241337 |

F 2.494632 0.477839 -3.829231  
 F -2.514628 0.621311 -1.838872  
 C -2.737156 2.861565 -1.290688  
 C 3.016262 -1.185192 -2.255300  
 C 2.195015 -0.166301 -2.699321  
 C -2.137003 1.637386 -1.053078  
 C -2.365451 3.960692 -0.532949  
 F 3.502954 -2.812020 -0.628151  
 C 2.703784 -1.842844 -1.078325  
 F 0.330743 1.182890 -2.460905  
 C 1.076216 0.186996 -1.957014  
 C 1.581468 -1.453358 -0.371414  
 C 0.731620 -0.426534 -0.762598  
 C -1.166677 1.433577 -0.079760  
 C -1.396963 3.814957 0.442007  
 F 1.345383 -2.110293 0.781860  
 C -0.829099 2.566010 0.639245  
 B -0.504205 -0.026096 0.222221  
 F -1.021522 4.864852 1.173968  
 F 0.124491 2.509181 1.606908  
 C -1.645441 -1.188118 0.284702  
 F -1.381419 -1.903439 -1.958060  
 F -2.104115 -0.645885 2.544449  
 C -1.983961 -2.027455 -0.767556  
 C -2.348242 -1.405585 1.461611  
 C -2.946645 -3.020200 -0.667839  
 C -3.316948 -2.385711 1.605880  
 F -3.237185 -3.801330 -1.710093  
 F -3.959558 -2.553782 2.764125  
 C -3.617130 -3.200809 0.529104  
 F -2.930240 5.146343 -0.747873  
 F -4.545532 -4.149210 0.643090  
 F 4.116565 -1.510640 -2.932115  
 H 1.090995 0.863294 2.242513  
 N 1.902097 0.629217 2.834828  
 C 2.168214 1.801843 3.726759  
 H 2.354822 2.674598 3.106655  
 H 1.291421 1.960683 4.350867  
 H 3.041379 1.571784 4.334029  
 C 3.019304 0.402498 1.891429  
 C 3.110777 1.276304 0.814255  
 C 3.930338 -0.622331 2.082336  
 C 4.148659 1.118114 -0.093286  
 H 2.369861 2.057060 0.678458

C 4.966869 -0.769567 1.162634  
 H 3.844778 -1.310508 2.912203  
 C 5.078763 0.095888 0.082140  
 H 4.221698 1.785642 -0.942904  
 H 5.678779 -1.574330 1.292403  
 H 5.880307 -0.034637 -0.634481  
 C 1.483130 -0.566429 3.624940  
 H 1.355333 -1.402518 2.942655  
 H 2.238302 -0.778248 4.378177  
 H 0.536606 -0.323819 4.103091

**N1-10**

| Symbol | X         | Y         | Z         |
|--------|-----------|-----------|-----------|
| H      | -0.726448 | 0.113004  | 2.275244  |
| F      | -4.203268 | 3.671454  | -1.091641 |
| F      | 3.285608  | 0.540341  | -2.878215 |
| F      | -3.519368 | 1.101522  | -1.215332 |
| C      | -2.998895 | 3.289963  | -0.681401 |
| C      | 3.046929  | -1.365691 | -1.528371 |
| C      | 2.563018  | -0.165453 | -2.015072 |
| C      | -2.619015 | 1.961312  | -0.737238 |
| C      | -2.109946 | 4.229876  | -0.185811 |
| F      | 2.802250  | -3.202377 | -0.081786 |
| C      | 2.308200  | -2.079217 | -0.596310 |
| F      | 0.901289  | 1.438389  | -2.119312 |
| C      | 1.323387  | 0.286403  | -1.594464 |
| C      | 1.071570  | -1.608101 | -0.208773 |
| C      | 0.518433  | -0.425348 | -0.706028 |
| C      | -1.361591 | 1.516667  | -0.330206 |
| C      | -0.852050 | 3.834286  | 0.238978  |
| F      | 0.403818  | -2.339942 | 0.686998  |
| C      | -0.500490 | 2.501223  | 0.148734  |
| B      | -0.947053 | 0.005717  | -0.370344 |
| F      | -0.001170 | 4.732594  | 0.722381  |
| F      | 0.720029  | 2.172947  | 0.575181  |
| C      | -2.041853 | -1.093138 | -0.122624 |
| F      | -1.130855 | -2.564380 | -1.739657 |
| F      | -3.135544 | 0.207082  | 1.525483  |
| C      | -2.059541 | -2.299936 | -0.819316 |
| C      | -3.067698 | -0.915264 | 0.804329  |
| C      | -3.025604 | -3.269083 | -0.617180 |
| C      | -4.037668 | -1.869560 | 1.046717  |
| F      | -3.009790 | -4.401886 | -1.310577 |
| F      | -4.985609 | -1.663179 | 1.953835  |

|   |           |           |           |
|---|-----------|-----------|-----------|
| C | -4.017018 | -3.052013 | 0.325088  |
| F | -2.462220 | 5.502450  | -0.114577 |
| F | -4.942299 | -3.973293 | 0.537567  |
| F | 4.207536  | -1.837123 | -1.949598 |
| H | 0.000177  | 0.011191  | 2.138037  |
| N | 2.469964  | -0.095974 | 2.459308  |
| C | 2.168534  | 1.022765  | 3.350336  |
| H | 1.878902  | 1.905517  | 2.783402  |
| H | 1.324069  | 0.748582  | 3.982421  |
| H | 3.022761  | 1.273483  | 3.993476  |
| C | 3.546769  | 0.100256  | 1.577577  |
| C | 3.667616  | 1.307181  | 0.866651  |
| C | 4.514098  | -0.892629 | 1.350599  |
| C | 4.685034  | 1.490316  | -0.057870 |
| H | 2.945640  | 2.097282  | 1.014016  |
| C | 5.532739  | -0.694424 | 0.423082  |
| H | 4.481407  | -1.827699 | 1.892582  |
| C | 5.623489  | 0.489197  | -0.297516 |
| H | 4.735921  | 2.424170  | -0.606091 |
| H | 6.256566  | -1.485134 | 0.262332  |
| H | 6.408397  | 0.631839  | -1.029527 |
| C | 2.398458  | -1.386836 | 3.122998  |
| H | 2.415160  | -2.189403 | 2.383600  |
| H | 3.217071  | -1.549172 | 3.839890  |
| H | 1.450820  | -1.448325 | 3.658995  |

### N1-11

| Symbol | X         | Y         | Z         |
|--------|-----------|-----------|-----------|
| Si     | 1.695196  | -2.248061 | -0.840896 |
| H      | -0.459647 | 0.081965  | 0.649212  |
| H      | 1.347508  | -3.315766 | -1.802398 |
| F      | 0.504795  | 5.877453  | 1.357143  |
| F      | 1.685309  | 2.352395  | -4.149515 |
| F      | -0.977405 | 4.079188  | 0.030027  |
| C      | 0.738162  | 4.572491  | 1.513033  |
| C      | 0.456912  | 0.353519  | -4.066483 |
| C      | 0.873655  | 1.530654  | -3.478992 |
| C      | -0.019412 | 3.623429  | 0.848947  |
| C      | 1.766738  | 4.157735  | 2.344586  |
| F      | -0.781495 | -1.643143 | -3.907535 |
| C      | -0.375299 | -0.494807 | -3.354918 |
| F      | 0.971257  | 2.978404  | -1.684686 |
| C      | 0.472672  | 1.833963  | -2.183950 |
| C      | -0.748281 | -0.147628 | -2.069181 |

|   |           |           |           |
|---|-----------|-----------|-----------|
| C | -0.328730 | 1.006152  | -1.415890 |
| C | 0.187252  | 2.255920  | 0.964121  |
| C | 2.008927  | 2.805654  | 2.497846  |
| F | -1.546996 | -1.016453 | -1.423395 |
| C | 1.212140  | 1.892472  | 1.822817  |
| B | -0.710582 | 1.154404  | 0.166243  |
| F | 3.009619  | 2.391599  | 3.285171  |
| F | 1.515121  | 0.593225  | 2.032975  |
| C | -2.305080 | 1.394906  | 0.418512  |
| F | -2.886463 | 2.037057  | -1.794563 |
| F | -1.992896 | 0.816663  | 2.691913  |
| C | -3.247944 | 1.761666  | -0.531060 |
| C | -2.822327 | 1.155305  | 1.685431  |
| C | -4.603145 | 1.868097  | -0.257218 |
| C | -4.169342 | 1.224818  | 1.998604  |
| F | -5.467705 | 2.217621  | -1.214216 |
| F | -4.609121 | 0.944756  | 3.228740  |
| C | -5.069709 | 1.585035  | 1.011564  |
| F | 2.517111  | 5.053844  | 2.984871  |
| F | -6.376684 | 1.636127  | 1.274124  |
| F | 0.872692  | 0.023118  | -5.289410 |
| H | 0.571795  | -1.797766 | -0.006287 |
| C | 2.650824  | -0.884960 | -1.677339 |
| C | 3.213451  | -1.085949 | -2.945330 |
| C | 2.878174  | 0.339765  | -1.035936 |
| C | 3.982009  | -0.097447 | -3.550994 |
| H | 3.038964  | -2.018723 | -3.473560 |
| C | 3.663259  | 1.324704  | -1.629640 |
| H | 2.419535  | 0.532433  | -0.072085 |
| C | 4.216910  | 1.104655  | -2.886910 |
| H | 4.390999  | -0.260343 | -4.540906 |
| H | 3.812978  | 2.272739  | -1.125374 |
| H | 4.810604  | 1.877477  | -3.360691 |
| C | 5.150092  | -1.293032 | 0.514095  |
| C | 4.108629  | -1.214158 | 1.505082  |
| C | 5.216505  | -2.476095 | -0.308409 |
| C | 3.084119  | -2.099620 | 1.481757  |
| H | 4.112603  | -0.423156 | 2.240939  |
| C | 4.186914  | -3.354453 | -0.313712 |
| H | 6.078304  | -2.650440 | -0.935689 |
| C | 2.977003  | -3.116337 | 0.450552  |
| H | 2.278674  | -2.012929 | 2.204879  |
| H | 4.231491  | -4.227308 | -0.956068 |
| H | 2.395403  | -3.998512 | 0.721367  |

|    |           |           |           |
|----|-----------|-----------|-----------|
| N  | 6.019996  | -0.307032 | 0.363625  |
| C  | 7.023644  | -0.354792 | -0.702810 |
| H  | 7.534526  | 0.602007  | -0.743576 |
| H  | 7.759157  | -1.138149 | -0.510785 |
| H  | 6.535016  | -0.533485 | -1.662610 |
| C  | 5.928302  | 0.896258  | 1.193818  |
| H  | 6.663869  | 1.615859  | 0.849320  |
| H  | 4.933178  | 1.338240  | 1.106958  |
| H  | 6.128498  | 0.661298  | 2.240517  |
| Si | -2.820743 | -3.753401 | -1.035062 |
| H  | -2.067320 | -3.596666 | -2.302827 |
| H  | -3.361763 | -5.138860 | -1.015040 |
| C  | -4.228081 | -2.510632 | -1.017525 |
| C  | -5.078071 | -2.409816 | 0.091943  |
| C  | -4.460564 | -1.662266 | -2.106608 |
| C  | -6.131781 | -1.501470 | 0.109890  |
| H  | -4.912299 | -3.043590 | 0.958797  |
| C  | -5.514276 | -0.752995 | -2.095518 |
| H  | -3.800982 | -1.701141 | -2.967967 |
| C  | -6.354799 | -0.676155 | -0.988805 |
| H  | -6.773268 | -1.432167 | 0.981163  |
| H  | -5.670697 | -0.093223 | -2.940934 |
| H  | -7.164992 | 0.043687  | -0.971624 |
| C  | -0.024585 | -3.193681 | 2.731681  |
| C  | -0.956474 | -2.204743 | 2.360715  |
| C  | 0.021769  | -4.370010 | 1.952447  |
| C  | -1.777377 | -2.380007 | 1.257985  |
| H  | -1.036653 | -1.281866 | 2.915047  |
| C  | -0.815815 | -4.523323 | 0.855021  |
| H  | 0.694040  | -5.176855 | 2.214001  |
| C  | -1.732737 | -3.536882 | 0.470944  |
| H  | -2.457063 | -1.574151 | 0.994608  |
| H  | -0.751423 | -5.451276 | 0.292381  |
| N  | 0.829316  | -3.004552 | 3.799782  |
| C  | 1.619089  | -4.122571 | 4.279575  |
| H  | 0.997193  | -4.977081 | 4.573978  |
| H  | 2.322929  | -4.462325 | 3.512664  |
| H  | 2.198799  | -3.802785 | 5.142487  |
| C  | 0.614210  | -1.867823 | 4.680028  |
| H  | 1.365807  | -1.883631 | 5.466141  |
| H  | 0.719493  | -0.928695 | 4.130577  |
| H  | -0.379334 | -1.885252 | 5.144310  |

**N1-12**

| Symbol | X         | Y         | Z         |
|--------|-----------|-----------|-----------|
| Si     | -3.758641 | 1.071611  | 2.213955  |
| H      | 0.000124  | 0.767530  | -1.417211 |
| H      | -5.116511 | 1.299208  | 2.772152  |
| F      | 4.377377  | 4.051501  | -3.163619 |
| F      | 1.639578  | 2.511376  | 3.915084  |
| F      | 3.697645  | 1.622382  | -2.381774 |
| C      | 3.217854  | 3.874887  | -2.523884 |
| C      | 0.298911  | 0.625321  | 3.521674  |
| C      | 1.093026  | 1.654224  | 3.050674  |
| C      | 2.832741  | 2.609644  | -2.095281 |
| C      | 2.399626  | 4.960748  | -2.283801 |
| F      | -0.981581 | -1.298116 | 3.053740  |
| C      | -0.246275 | -0.268262 | 2.617026  |
| F      | 2.105204  | 2.809306  | 1.325999  |
| C      | 1.323224  | 1.781167  | 1.686571  |
| C      | 0.008997  | -0.099508 | 1.267243  |
| C      | 0.796744  | 0.916117  | 0.737720  |
| C      | 1.646714  | 2.359665  | -1.422576 |
| C      | 1.193942  | 4.761389  | -1.631996 |
| F      | -0.538014 | -1.015363 | 0.445386  |
| C      | 0.849773  | 3.483149  | -1.237502 |
| B      | 1.066506  | 0.931295  | -0.881543 |
| F      | 0.389165  | 5.799843  | -1.386561 |
| F      | -0.337413 | 3.350464  | -0.619989 |
| C      | 2.001701  | -0.362208 | -1.207281 |
| F      | 3.761617  | 0.472159  | 0.115728  |
| F      | 0.366080  | -1.414716 | -2.575118 |
| C      | 3.268966  | -0.503891 | -0.662988 |
| C      | 1.572351  | -1.432183 | -1.974789 |
| C      | 4.084265  | -1.600974 | -0.878268 |
| C      | 2.334915  | -2.573893 | -2.176747 |
| F      | 5.317203  | -1.654621 | -0.370389 |
| F      | 1.857887  | -3.600058 | -2.897582 |
| C      | 3.598360  | -2.661753 | -1.622532 |
| F      | 2.760363  | 6.182255  | -2.678424 |
| F      | 4.337844  | -3.754855 | -1.806716 |
| F      | 0.058268  | 0.497978  | 4.825674  |
| H      | -3.274829 | -0.222347 | 2.764738  |
| C      | -2.566800 | 2.420235  | 2.735165  |
| C      | -2.228544 | 2.578099  | 4.087917  |
| C      | -1.973741 | 3.270521  | 1.798962  |
| C      | -1.330541 | 3.559206  | 4.487981  |
| H      | -2.660724 | 1.921093  | 4.837413  |

|    |           |           |           |
|----|-----------|-----------|-----------|
| C  | -1.062930 | 4.249406  | 2.194590  |
| H  | -2.216036 | 3.170745  | 0.747776  |
| C  | -0.747018 | 4.397834  | 3.538899  |
| H  | -1.071326 | 3.662052  | 5.535229  |
| H  | -0.600557 | 4.884052  | 1.447624  |
| H  | -0.032060 | 5.150644  | 3.848877  |
| C  | -4.338346 | 0.422750  | -2.443905 |
| C  | -3.043837 | 0.533019  | -1.882211 |
| C  | -5.435319 | 0.621277  | -1.573547 |
| C  | -2.870880 | 0.778970  | -0.525989 |
| H  | -2.164862 | 0.438132  | -2.505387 |
| C  | -5.234709 | 0.865879  | -0.221793 |
| H  | -6.447561 | 0.590830  | -1.953445 |
| C  | -3.956669 | 0.921362  | 0.356574  |
| H  | -1.849517 | 0.868041  | -0.172175 |
| H  | -6.110860 | 1.008757  | 0.403910  |
| H  | -4.009336 | -1.295493 | -0.572849 |
| N  | -4.520496 | 0.109187  | -3.762815 |
| C  | -5.847310 | 0.230893  | -4.344882 |
| H  | -5.788350 | 0.008940  | -5.407200 |
| H  | -6.543329 | -0.480531 | -3.890934 |
| H  | -6.255724 | 1.240220  | -4.221422 |
| C  | -3.367503 | 0.045435  | -4.646891 |
| H  | -3.701269 | -0.248477 | -5.638738 |
| H  | -2.847384 | 1.007248  | -4.718419 |
| H  | -2.654110 | -0.706512 | -4.299502 |
| Si | 0.991286  | -5.341195 | 0.504784  |
| H  | 0.733051  | -6.417888 | 1.490310  |
| H  | 1.462214  | -5.938571 | -0.766149 |
| C  | 2.264018  | -4.130317 | 1.166940  |
| C  | 3.623427  | -4.472158 | 1.219290  |
| C  | 1.871856  | -2.884010 | 1.668475  |
| C  | 4.555571  | -3.602499 | 1.770835  |
| H  | 3.961032  | -5.424740 | 0.822278  |
| C  | 2.807727  | -2.004295 | 2.211483  |
| H  | 0.826230  | -2.597892 | 1.626082  |
| C  | 4.147701  | -2.366693 | 2.269191  |
| H  | 5.603465  | -3.877140 | 1.796690  |
| H  | 2.493083  | -1.032218 | 2.575992  |
| H  | 4.878691  | -1.680566 | 2.680741  |
| C  | -3.008858 | -3.012793 | -0.140701 |
| C  | -2.020232 | -2.955725 | -1.114343 |
| C  | -2.836403 | -3.753367 | 1.017991  |
| C  | -0.850261 | -3.677063 | -0.928609 |

|   |           |           |           |
|---|-----------|-----------|-----------|
| H | -2.140837 | -2.342992 | -2.000038 |
| C | -1.646397 | -4.456471 | 1.191790  |
| H | -3.591391 | -3.797300 | 1.789870  |
| C | -0.639166 | -4.439156 | 0.225590  |
| H | -0.097242 | -3.641430 | -1.705751 |
| H | -1.517613 | -5.027869 | 2.104375  |
| N | -4.275314 | -2.279211 | -0.408489 |
| C | -5.239364 | -2.279836 | 0.730055  |
| H | -5.565353 | -3.303169 | 0.905800  |
| H | -4.749630 | -1.869164 | 1.610256  |
| H | -6.085243 | -1.661163 | 0.444171  |
| C | -4.947351 | -2.792578 | -1.647775 |
| H | -5.879988 | -2.247954 | -1.775185 |
| H | -4.299786 | -2.625080 | -2.504347 |
| H | -5.130076 | -3.856314 | -1.510043 |

**N1-13**

| Symbol | X         | Y         | Z         |
|--------|-----------|-----------|-----------|
| H      | -1.161232 | -0.174933 | 1.413310  |
| F      | -3.758856 | 4.785070  | 0.558366  |
| F      | 2.341588  | 0.912374  | -3.022139 |
| F      | -3.824140 | 2.204931  | 0.008996  |
| C      | -2.648282 | 4.061074  | 0.710857  |
| C      | 1.866003  | -1.258664 | -2.264966 |
| C      | 1.601671  | 0.098475  | -2.266272 |
| C      | -2.647717 | 2.701229  | 0.423523  |
| C      | -1.494063 | 4.667331  | 1.164373  |
| F      | 1.298209  | -3.417459 | -1.511424 |
| C      | 1.065041  | -2.104199 | -1.516148 |
| F      | 0.377955  | 1.926782  | -1.561988 |
| C      | 0.561936  | 0.601808  | -1.494987 |
| C      | 0.033996  | -1.553381 | -0.779024 |
| C      | -0.248739 | -0.195909 | -0.700768 |
| C      | -1.528443 | 1.893090  | 0.557160  |
| C      | -0.350609 | 3.902364  | 1.326341  |
| F      | -0.715214 | -2.423561 | -0.059338 |
| C      | -0.399231 | 2.554820  | 1.026816  |
| B      | -1.442616 | 0.280691  | 0.319591  |
| F      | 0.772486  | 4.471658  | 1.767782  |
| F      | 0.744407  | 1.864042  | 1.203371  |
| C      | -2.822507 | -0.420283 | -0.179945 |
| F      | -2.814138 | 0.828871  | -2.173076 |
| F      | -2.991529 | -1.824821 | 1.728962  |
| C      | -3.382070 | -0.117752 | -1.412785 |

|    |           |           |           |
|----|-----------|-----------|-----------|
| C  | -3.469544 | -1.414567 | 0.528713  |
| C  | -4.517094 | -0.733551 | -1.907820 |
| C  | -4.605677 | -2.067858 | 0.076116  |
| F  | -5.023972 | -0.398727 | -3.094661 |
| F  | -5.183999 | -3.025743 | 0.803722  |
| C  | -5.134450 | -1.719298 | -1.152795 |
| F  | -1.479230 | 5.968564  | 1.447262  |
| F  | -6.225685 | -2.328857 | -1.611316 |
| F  | 2.877880  | -1.749301 | -2.981754 |
| H  | -0.887017 | -1.812789 | 2.101541  |
| C  | 1.070206  | -2.318199 | 2.120395  |
| C  | 1.784595  | -3.435841 | 1.720034  |
| C  | 1.575426  | -1.036165 | 1.949571  |
| C  | 3.030183  | -3.251766 | 1.126543  |
| H  | 1.392660  | -4.436702 | 1.832627  |
| C  | 2.814381  | -0.872819 | 1.343963  |
| H  | 0.996908  | -0.165846 | 2.232737  |
| C  | 3.564240  | -1.976883 | 0.921408  |
| H  | 3.575740  | -4.131516 | 0.801690  |
| H  | 3.183726  | 0.135060  | 1.183877  |
| N  | -0.299586 | -2.433828 | 2.681680  |
| C  | -0.375488 | -1.924256 | 4.088138  |
| H  | -1.417205 | -1.951117 | 4.400737  |
| H  | 0.235184  | -2.570627 | 4.715007  |
| H  | -0.000418 | -0.905401 | 4.117253  |
| C  | -0.908321 | -3.793059 | 2.587700  |
| H  | -1.943034 | -3.708787 | 2.908202  |
| H  | -0.865349 | -4.125762 | 1.554807  |
| H  | -0.363313 | -4.469182 | 3.242714  |
| Si | 5.242581  | -1.757473 | 0.080554  |
| H  | 6.307324  | -2.224006 | 0.999270  |
| H  | 5.253006  | -2.572420 | -1.155729 |
| C  | 5.473698  | 0.055257  | -0.306491 |
| C  | 6.062821  | 0.923514  | 0.621719  |
| C  | 4.961123  | 0.595157  | -1.492304 |
| C  | 6.133297  | 2.290697  | 0.373797  |
| H  | 6.470255  | 0.531098  | 1.548495  |
| C  | 5.023165  | 1.962771  | -1.740631 |
| H  | 4.512536  | -0.056231 | -2.235499 |
| C  | 5.610045  | 2.810810  | -0.806633 |
| H  | 6.593738  | 2.950005  | 1.100129  |
| H  | 4.611192  | 2.362837  | -2.659118 |
| H  | 5.659921  | 3.876200  | -0.998002 |

#### N1-14

| Symbol | X         | Y         | Z         |
|--------|-----------|-----------|-----------|
| H      | -1.216005 | 0.628681  | 2.413569  |
| F      | -2.642771 | 5.119501  | -1.398322 |
| F      | 2.773324  | 2.162596  | -0.596590 |
| F      | -1.356848 | 2.806011  | -1.716361 |
| C      | -2.893624 | 4.107164  | -0.575949 |
| C      | 2.260999  | 0.152372  | -1.691874 |
| C      | 1.885943  | 1.217909  | -0.888148 |
| C      | -2.235565 | 2.899019  | -0.718051 |
| C      | -3.825183 | 4.258521  | 0.438525  |
| F      | 1.736889  | -1.903599 | -2.693627 |
| C      | 1.367394  | -0.869333 | -1.949202 |
| F      | 0.299287  | 2.307954  | 0.384588  |
| C      | 0.602714  | 1.264811  | -0.387467 |
| C      | 0.095686  | -0.807989 | -1.405716 |
| C      | -0.352473 | 0.271480  | -0.640011 |
| C      | -2.480122 | 1.806319  | 0.113148  |
| C      | -4.095527 | 3.202498  | 1.293316  |
| F      | -0.699827 | -1.842737 | -1.675824 |
| C      | -3.434686 | 2.002124  | 1.108283  |
| B      | -1.821942 | 0.402160  | -0.139537 |
| F      | -4.979770 | 3.351215  | 2.272500  |
| F      | -3.712153 | 1.016785  | 1.962992  |
| C      | -2.788087 | -0.855450 | -0.141282 |
| F      | -3.066386 | -0.414919 | -2.426912 |
| F      | -2.619457 | -1.446523 | 2.141132  |
| C      | -3.373387 | -1.167122 | -1.360654 |
| C      | -3.120323 | -1.669705 | 0.924939  |
| C      | -4.228151 | -2.237099 | -1.537163 |
| C      | -3.964820 | -2.760715 | 0.785216  |
| F      | -4.757592 | -2.504317 | -2.726136 |
| F      | -4.227119 | -3.541257 | 1.830590  |
| C      | -4.520953 | -3.045327 | -0.448552 |
| F      | -4.453608 | 5.412382  | 0.591988  |
| F      | -5.330329 | -4.085789 | -0.591636 |
| F      | 3.482539  | 0.109532  | -2.200058 |
| H      | -0.617022 | 0.254810  | 2.199146  |
| C      | 1.478234  | -2.168526 | 1.273908  |
| C      | 2.028473  | -3.019852 | 0.300353  |
| C      | 2.248030  | -1.059122 | 1.672071  |
| C      | 3.298815  | -2.782771 | -0.214698 |
| H      | 1.475064  | -3.876229 | -0.059639 |
| C      | 3.514923  | -0.842125 | 1.154699  |



|    |           |           |           |
|----|-----------|-----------|-----------|
| H  | 1.848922  | -0.352269 | 2.387294  |
| C  | 4.081538  | -1.702351 | 0.203185  |
| H  | 3.679926  | -3.471997 | -0.962843 |
| H  | 4.069828  | 0.028526  | 1.493069  |
| N  | 0.202301  | -2.379050 | 1.819199  |
| C  | 0.099207  | -2.243889 | 3.273998  |
| H  | -0.953384 | -2.229292 | 3.552711  |
| H  | 0.594099  | -3.081638 | 3.784528  |
| H  | 0.548554  | -1.316975 | 3.619103  |
| C  | -0.510708 | -3.556926 | 1.347334  |
| H  | -1.481667 | -3.591902 | 1.840271  |
| H  | -0.671130 | -3.498018 | 0.269104  |
| H  | 0.020347  | -4.491692 | 1.579405  |
| Si | 5.814340  | -1.438412 | -0.465486 |
| H  | 6.729933  | -2.485341 | 0.053240  |
| H  | 5.793647  | -1.526878 | -1.945270 |
| C  | 6.474299  | 0.224494  | 0.100930  |
| C  | 7.444111  | 0.293845  | 1.109064  |
| C  | 5.986849  | 1.426904  | -0.430522 |
| C  | 7.910454  | 1.520422  | 1.575404  |
| H  | 7.841995  | -0.620364 | 1.538255  |
| C  | 6.448592  | 2.653890  | 0.033591  |
| H  | 5.236444  | 1.412534  | -1.214133 |
| C  | 7.411647  | 2.702086  | 1.038142  |
| H  | 8.661512  | 1.552737  | 2.356077  |
| H  | 6.058029  | 3.572499  | -0.388670 |
| H  | 7.772333  | 3.658282  | 1.399055  |

### N1-TS1

| Symbol | X         | Y         | Z         |
|--------|-----------|-----------|-----------|
| Si     | -1.043021 | 0.122253  | -1.883088 |
| H      | 0.430651  | 0.036110  | -0.621427 |
| H      | -0.436819 | -1.082703 | -2.470552 |
| F      | 5.392104  | 2.974711  | -0.214413 |
| F      | -0.614281 | 1.302864  | 4.669739  |
| F      | 4.319604  | 0.574559  | 0.131423  |
| C      | 4.065430  | 2.855820  | -0.146604 |
| C      | -1.211143 | -0.777809 | 3.757448  |
| C      | -0.476850 | 0.389776  | 3.704927  |
| C      | 3.474408  | 1.610453  | 0.022162  |
| C      | 3.271545  | 3.982358  | -0.245233 |
| F      | -1.760169 | -2.852678 | 2.796850  |
| C      | -1.057958 | -1.718726 | 2.753562  |
| F      | 1.062399  | 1.772148  | 2.678529  |

|   |           |           |           |
|---|-----------|-----------|-----------|
| C | 0.389503  | 0.610920  | 2.641785  |
| C | -0.197957 | -1.450207 | 1.707340  |
| C | 0.552006  | -0.283839 | 1.594425  |
| C | 2.101377  | 1.424509  | 0.091776  |
| C | 1.895355  | 3.850061  | -0.164033 |
| F | -0.122097 | -2.380712 | 0.740976  |
| C | 1.353186  | 2.590337  | 0.004870  |
| B | 1.357041  | -0.014129 | 0.213765  |
| F | 1.117113  | 4.930918  | -0.243499 |
| F | 0.013797  | 2.523032  | 0.117031  |
| C | 2.280775  | -1.228967 | -0.331999 |
| F | 2.599472  | -2.309242 | 1.752333  |
| F | 2.145360  | -0.304236 | -2.502694 |
| C | 2.816387  | -2.254846 | 0.429836  |
| C | 2.595321  | -1.273135 | -1.682746 |
| C | 3.600126  | -3.265877 | -0.104320 |
| C | 3.371047  | -2.263052 | -2.260296 |
| F | 4.089341  | -4.234021 | 0.672623  |
| F | 3.636772  | -2.255670 | -3.568033 |
| C | 3.878911  | -3.270788 | -1.459296 |
| F | 3.822098  | 5.183282  | -0.408783 |
| F | 4.629227  | -4.235819 | -1.988031 |
| F | -2.071048 | -0.994844 | 4.751820  |
| H | -0.393600 | 1.417847  | -2.117776 |
| C | -2.185277 | -0.169694 | -0.446031 |
| C | -2.744440 | -1.442115 | -0.270911 |
| C | -2.548883 | 0.849670  | 0.441952  |
| C | -3.647751 | -1.689303 | 0.758019  |
| H | -2.470416 | -2.253473 | -0.937529 |
| C | -3.445687 | 0.602035  | 1.476793  |
| H | -2.129878 | 1.842636  | 0.330777  |
| C | -4.002471 | -0.665215 | 1.630692  |
| H | -4.060007 | -2.683024 | 0.887989  |
| H | -3.707231 | 1.397934  | 2.164869  |
| H | -4.696372 | -0.858346 | 2.440984  |
| C | -4.955007 | 0.325022  | -2.105065 |
| C | -4.300433 | 1.581511  | -2.314072 |
| C | -4.466838 | -0.811630 | -2.826002 |
| C | -3.126254 | 1.633687  | -3.005629 |
| H | -4.721048 | 2.489174  | -1.906756 |
| C | -3.285083 | -0.737768 | -3.503107 |
| H | -5.011939 | -1.743902 | -2.803939 |
| C | -2.494123 | 0.450719  | -3.498157 |
| H | -2.627688 | 2.588225  | -3.134216 |

|   |           |           |           |
|---|-----------|-----------|-----------|
| H | -2.908240 | -1.617628 | -4.013291 |
| H | -1.726710 | 0.558921  | -4.261178 |
| N | -5.988727 | 0.217024  | -1.265079 |
| C | -6.677207 | -1.059768 | -1.099562 |
| H | -7.439567 | -0.949447 | -0.333865 |
| H | -7.159581 | -1.370706 | -2.029670 |
| H | -5.972821 | -1.831680 | -0.781781 |
| C | -6.459212 | 1.379210  | -0.516878 |
| H | -7.190869 | 1.050517  | 0.215747  |
| H | -5.626160 | 1.846467  | 0.011716  |
| H | -6.927587 | 2.114306  | -1.176870 |

### N1-TS2

| Symbol | X         | Y         | Z         |
|--------|-----------|-----------|-----------|
| F      | 1.474924  | 5.162592  | -1.725271 |
| F      | 5.143526  | -0.311862 | -2.070541 |
| F      | 0.900427  | 2.578550  | -2.222422 |
| C      | 1.340489  | 4.302388  | -0.718257 |
| C      | 3.739416  | -2.162071 | -1.732386 |
| C      | 3.958704  | -0.799294 | -1.705668 |
| C      | 1.039505  | 2.973079  | -0.949820 |
| C      | 1.507418  | 4.737369  | 0.587019  |
| F      | 2.296978  | -3.975844 | -1.336178 |
| C      | 2.508793  | -2.661807 | -1.340644 |
| F      | 3.254137  | 1.356207  | -1.285485 |
| C      | 2.948241  | 0.053780  | -1.281609 |
| C      | 1.535886  | -1.780540 | -0.918582 |
| C      | 1.698079  | -0.399931 | -0.879287 |
| C      | 0.902207  | 2.038234  | 0.065125  |
| C      | 1.371677  | 3.840049  | 1.630879  |
| F      | 0.369485  | -2.307307 | -0.522005 |
| C      | 1.071571  | 2.515747  | 1.352260  |
| B      | 0.506246  | 0.527041  | -0.324444 |
| F      | 1.521564  | 4.255668  | 2.887164  |
| F      | 0.921247  | 1.696984  | 2.408434  |
| C      | -0.955989 | 0.425647  | -0.992430 |
| F      | -0.394410 | -1.054603 | -2.762556 |
| F      | -1.776675 | 1.917867  | 0.654448  |
| C      | -1.309226 | -0.350939 | -2.089483 |
| C      | -1.998871 | 1.151606  | -0.421696 |
| C      | -2.613140 | -0.449040 | -2.555182 |
| C      | -3.301075 | 1.105589  | -0.879299 |
| F      | -2.910657 | -1.242717 | -3.582649 |
| F      | -4.260941 | 1.801375  | -0.271465 |

|    |           |           |           |
|----|-----------|-----------|-----------|
| C  | -3.616068 | 0.280199  | -1.942707 |
| F  | 1.796342  | 6.010910  | 0.833749  |
| F  | -4.874527 | 0.179875  | -2.357524 |
| F  | 4.710089  | -2.992298 | -2.097773 |
| H  | -0.331813 | -0.389562 | 1.257825  |
| Si | 0.004439  | -1.537095 | 3.438210  |
| H  | 0.411040  | -0.031626 | 0.929879  |
| H  | -0.443314 | -2.621685 | 4.342847  |
| C  | 1.590854  | -2.081611 | 2.598276  |
| C  | 1.788431  | -3.425011 | 2.248792  |
| C  | 2.628563  | -1.172890 | 2.346965  |
| C  | 2.981867  | -3.848815 | 1.673361  |
| H  | 1.008552  | -4.155909 | 2.441002  |
| C  | 3.824516  | -1.592584 | 1.771351  |
| H  | 2.506270  | -0.127218 | 2.612017  |
| C  | 4.003534  | -2.932115 | 1.439663  |
| H  | 3.116509  | -4.890914 | 1.409671  |
| H  | 4.617075  | -0.876097 | 1.587361  |
| H  | 4.935387  | -3.261352 | 0.992958  |
| H  | 0.233174  | -0.289698 | 4.199758  |
| C  | -3.998279 | -1.232290 | 1.028977  |
| C  | -3.638523 | -0.249808 | 1.992335  |
| C  | -3.028094 | -2.217116 | 0.700041  |
| C  | -2.375579 | -0.229850 | 2.534327  |
| H  | -4.348318 | 0.512081  | 2.282594  |
| C  | -1.786111 | -2.199475 | 1.287352  |
| H  | -3.267623 | -3.011230 | 0.007535  |
| C  | -1.379109 | -1.185936 | 2.195761  |
| H  | -2.132274 | 0.557092  | 3.242004  |
| H  | -1.091777 | -2.993517 | 1.036791  |
| N  | -5.212777 | -1.219775 | 0.429747  |
| C  | -5.548219 | -2.239589 | -0.554361 |
| H  | -4.800150 | -2.265736 | -1.350946 |
| H  | -5.615268 | -3.235048 | -0.103550 |
| H  | -6.505432 | -1.991534 | -1.004567 |
| C  | -6.271459 | -0.347795 | 0.926675  |
| H  | -7.166797 | -0.515729 | 0.334416  |
| H  | -6.500263 | -0.561233 | 1.975218  |
| H  | -5.992566 | 0.701814  | 0.830421  |

### N1-TS3

| Symbol | X         | Y         | Z        |
|--------|-----------|-----------|----------|
| Si     | -1.633698 | -0.303161 | 0.739713 |
| H      | 0.900377  | -0.220211 | 0.644953 |

|   |           |           |           |   |           |           |           |
|---|-----------|-----------|-----------|---|-----------|-----------|-----------|
| H | -1.245959 | 0.680013  | -0.294496 | H | -2.230796 | -4.574766 | -1.819165 |
| F | 6.681340  | 0.778201  | 1.411215  | H | 0.759748  | -4.648859 | 1.254794  |
| F | 3.744510  | -4.723650 | -1.039424 | H | -0.478698 | -5.793862 | -0.560917 |
| F | 4.761309  | 0.417144  | -0.436927 | C | -6.092539 | -1.371700 | 0.840114  |
| C | 5.428882  | 0.509902  | 1.788700  | C | -5.342550 | -1.297629 | 2.056590  |
| C | 1.894849  | -3.929806 | -2.251565 | C | -5.530591 | -0.771627 | -0.328803 |
| C | 2.881650  | -3.737877 | -1.306968 | C | -4.126653 | -0.679624 | 2.082377  |
| C | 4.420926  | 0.329309  | 0.859188  | H | -5.733984 | -1.735642 | 2.963114  |
| C | 5.127162  | 0.402080  | 3.137077  | C | -4.308482 | -0.160813 | -0.275996 |
| F | 0.032927  | -3.084320 | -3.413849 | H | -6.064211 | -0.806276 | -1.267537 |
| C | 1.002663  | -2.903547 | -2.512601 | C | -3.534306 | -0.067481 | 0.928101  |
| F | 3.933977  | -2.450089 | 0.295294  | H | -3.583709 | -0.645460 | 3.023458  |
| C | 2.955119  | -2.529834 | -0.624086 | H | -3.907876 | 0.276046  | -1.186947 |
| C | 1.114522  | -1.720902 | -1.809099 | H | -3.358901 | 1.187068  | 1.184209  |
| C | 2.076694  | -1.478898 | -0.834159 | N | -7.284335 | -1.980898 | 0.801468  |
| C | 3.107561  | 0.039001  | 1.197251  | C | -8.040747 | -2.050627 | -0.445811 |
| C | 3.832120  | 0.112516  | 3.524103  | H | -8.970582 | -2.580517 | -0.263009 |
| F | 0.202445  | -0.771929 | -2.086735 | H | -8.278306 | -1.049623 | -0.813844 |
| C | 2.853796  | -0.061013 | 2.554172  | H | -7.479466 | -2.588277 | -1.213468 |
| B | 1.952714  | -0.126411 | 0.063394  | C | -7.842018 | -2.595728 | 2.003284  |
| F | 3.537885  | 0.003074  | 4.823263  | H | -8.804804 | -3.033628 | 1.758377  |
| F | 1.619597  | -0.348206 | 3.005563  | H | -7.186695 | -3.385462 | 2.377640  |
| C | 1.885829  | 1.264886  | -0.790482 | H | -7.989685 | -1.851760 | 2.789579  |
| F | 2.817421  | 0.441924  | -2.809296 | C | -3.211447 | 3.231943  | 0.169882  |
| F | 0.944310  | 2.335586  | 1.103296  | C | -2.028239 | 3.874884  | -0.198148 |
| C | 2.311154  | 1.458266  | -2.096608 | C | -4.254156 | 3.138041  | -0.758096 |
| C | 1.395977  | 2.404158  | -0.165023 | C | -1.893746 | 4.409779  | -1.475680 |
| C | 2.246285  | 2.681197  | -2.749709 | H | -1.210810 | 3.981657  | 0.499553  |
| C | 1.346313  | 3.649811  | -0.765302 | C | -4.105265 | 3.671138  | -2.032534 |
| F | 2.653530  | 2.804435  | -4.015044 | H | -5.183491 | 2.647974  | -0.500856 |
| F | 0.888157  | 4.721826  | -0.104699 | C | -2.925366 | 4.308253  | -2.399999 |
| C | 1.760392  | 3.787032  | -2.077841 | H | -0.973192 | 4.917024  | -1.739818 |
| F | 6.081188  | 0.572203  | 4.053183  | H | -4.922191 | 3.587323  | -2.739039 |
| F | 1.683014  | 4.973214  | -2.683231 | H | -2.813448 | 4.725586  | -3.392789 |
| F | 1.781839  | -5.097007 | -2.888338 | N | -3.354755 | 2.607065  | 1.458104  |
| H | -1.076595 | 0.020321  | 2.069166  | C | -4.684908 | 2.767273  | 2.075272  |
| C | -1.289321 | -2.093141 | 0.317880  | H | -4.654010 | 2.327992  | 3.071554  |
| C | -1.981336 | -2.755400 | -0.703282 | H | -4.958728 | 3.822695  | 2.145649  |
| C | -0.304713 | -2.797653 | 1.022506  | H | -5.434315 | 2.228685  | 1.495911  |
| C | -1.696452 | -4.080904 | -1.016101 | C | -2.272921 | 2.868670  | 2.419997  |
| H | -2.744245 | -2.234464 | -1.274186 | H | -2.465221 | 2.275916  | 3.313540  |
| C | -0.015938 | -4.122287 | 0.710300  | H | -1.314889 | 2.561695  | 2.003050  |
| H | 0.259508  | -2.296122 | 1.803694  | H | -2.233149 | 3.928116  | 2.691043  |
| C | -0.712015 | -4.765264 | -0.309171 |   |           |           |           |

**N1-TS4**

| Symbol | X         | Y         | Z         |
|--------|-----------|-----------|-----------|
| H      | -0.546304 | 0.029200  | 1.517805  |
| F      | -4.547716 | 3.005709  | -1.165267 |
| F      | 3.033144  | 1.429542  | -3.077795 |
| F      | -3.431877 | 0.593771  | -1.121647 |
| C      | -3.319057 | 2.862786  | -0.678146 |
| C      | 3.256904  | -0.602688 | -1.926491 |
| C      | 2.526390  | 0.529085  | -2.238892 |
| C      | -2.716140 | 1.614029  | -0.640739 |
| C      | -2.633902 | 3.967109  | -0.205478 |
| F      | 3.436821  | -2.617412 | -0.725957 |
| C      | 2.742831  | -1.526540 | -1.032669 |
| F      | 0.635042  | 1.839160  | -2.015392 |
| C      | 1.285145  | 0.728080  | -1.656320 |
| C      | 1.507824  | -1.285777 | -0.464526 |
| C      | 0.729967  | -0.168316 | -0.749882 |
| C      | -1.433312 | 1.417812  | -0.146354 |
| C      | -1.349980 | 3.817148  | 0.295823  |
| F      | 1.060490  | -2.187912 | 0.419271  |
| C      | -0.783214 | 2.558736  | 0.306517  |
| B      | -0.710665 | -0.003938 | -0.090340 |
| F      | -0.684484 | 4.874404  | 0.749658  |
| F      | 0.464818  | 2.448695  | 0.784282  |
| C      | -1.660614 | -1.287107 | -0.019743 |
| F      | -0.697795 | -2.358103 | -1.902468 |
| F      | -2.788690 | -0.387359 | 1.843302  |
| C      | -1.600684 | -2.344603 | -0.918007 |
| C      | -2.656852 | -1.374705 | 0.945923  |
| C      | -2.466993 | -3.425080 | -0.860360 |
| C      | -3.531919 | -2.439268 | 1.044209  |
| F      | -2.376634 | -4.413125 | -1.745422 |
| F      | -4.460715 | -2.478054 | 1.994321  |
| C      | -3.434888 | -3.473112 | 0.126889  |
| F      | -3.200278 | 5.165070  | -0.233044 |
| F      | -4.267062 | -4.502765 | 0.195188  |
| F      | 4.453175  | -0.789973 | -2.464262 |
| H      | 0.240912  | 0.080598  | 1.536034  |
| N      | 1.815004  | 0.103818  | 2.568364  |
| C      | 1.569159  | 1.314316  | 3.364089  |
| H      | 1.802827  | 2.209917  | 2.797231  |
| H      | 0.511806  | 1.348124  | 3.635197  |
| H      | 2.169475  | 1.304845  | 4.282453  |
| C      | 3.070371  | 0.083515  | 1.896932  |

|   |          |           |           |
|---|----------|-----------|-----------|
| C | 3.424804 | 1.162696  | 1.071620  |
| C | 3.946457 | -1.002238 | 1.983990  |
| C | 4.619767 | 1.154390  | 0.370319  |
| H | 2.745513 | 1.997005  | 0.953142  |
| C | 5.139884 | -1.006150 | 1.262620  |
| H | 3.710916 | -1.856180 | 2.603619  |
| C | 5.488686 | 0.066713  | 0.456365  |
| H | 4.862893 | 1.994926  | -0.270280 |
| H | 5.795591 | -1.865454 | 1.337877  |
| H | 6.414072 | 0.056762  | -0.105468 |
| C | 1.495897 | -1.082372 | 3.359132  |
| H | 1.537841 | -1.975050 | 2.737573  |
| H | 2.171520 | -1.201894 | 4.216147  |
| H | 0.477895 | -0.975405 | 3.737989  |

**N1-TS5**

| Symbol | X         | Y         | Z         |
|--------|-----------|-----------|-----------|
| Si     | 0.620961  | 3.714372  | 1.116018  |
| H      | 0.786864  | -0.551505 | -1.139744 |
| H      | 0.611348  | 5.169753  | 1.396741  |
| F      | 3.015325  | -5.680816 | -2.000566 |
| F      | 1.300013  | -1.529690 | 4.583892  |
| F      | 0.765071  | -4.345054 | -1.623145 |
| C      | 3.063064  | -4.470705 | -1.439049 |
| C      | -0.202518 | 0.029120  | 3.679943  |
| C      | 0.685190  | -1.016749 | 3.515844  |
| C      | 1.897201  | -3.745117 | -1.222466 |
| C      | 4.283199  | -3.932710 | -1.080589 |
| F      | -1.661627 | 1.595106  | 2.711407  |
| C      | -0.802994 | 0.580635  | 2.562136  |
| F      | 1.825089  | -2.521625 | 2.182601  |
| C      | 0.952609  | -1.502553 | 2.243744  |
| C      | -0.494308 | 0.074238  | 1.311440  |
| C      | 0.383207  | -0.981188 | 1.091777  |
| C      | 1.876669  | -2.484331 | -0.646284 |
| C      | 4.316369  | -2.675042 | -0.501318 |
| F      | -1.107579 | 0.655515  | 0.259262  |
| C      | 3.131021  | -1.993797 | -0.301345 |
| B      | 0.581811  | -1.514133 | -0.446084 |
| F      | 5.488525  | -2.127132 | -0.162907 |
| F      | 3.238409  | -0.774280 | 0.264983  |
| C      | -0.856751 | -2.137525 | -0.886960 |
| F      | -0.715578 | -3.852809 | 0.719969  |
| F      | -1.229090 | -0.476849 | -2.542839 |

C -1.420215 -3.225163 -0.235854  
 C -1.664654 -1.539401 -1.838035  
 C -2.684914 -3.711112 -0.510745  
 C -2.953379 -1.970384 -2.123226  
 F -3.184530 -4.759076 0.149868  
 F -3.708115 -1.328871 -3.023410  
 C -3.463109 -3.070629 -1.461590  
 F 5.412030 -4.609184 -1.290605  
 F -4.688926 -3.513704 -1.736830  
 F -0.470452 0.506675 4.894096  
 H -0.766512 3.222023 0.982951  
 C 1.563195 2.798059 2.450913  
 C 1.325895 3.105813 3.797406  
 C 2.459304 1.764468 2.150548  
 C 1.961363 2.398639 4.812975  
 H 0.632938 3.899256 4.061548  
 C 3.094293 1.055071 3.165576  
 H 2.657466 1.487807 1.120933  
 C 2.846020 1.371164 4.497918  
 H 1.758525 2.641935 5.849089  
 H 3.767760 0.244252 2.910733  
 H 3.331536 0.811402 5.288457  
 C 3.757176 2.348870 -1.864839  
 C 2.567547 1.579863 -1.676430  
 C 3.746738 3.716064 -1.435505  
 C 1.482267 2.125670 -1.057077  
 H 2.524696 0.544933 -1.984899  
 C 2.651546 4.237939 -0.812816  
 H 4.622193 4.334001 -1.572856  
 C 1.447303 3.484420 -0.585568  
 H 0.610301 1.495990 -0.905783  
 H 2.694460 5.268193 -0.470019  
 H 0.458547 4.047507 -1.214159  
 N 4.848530 1.803957 -2.412115  
 C 6.063477 2.593955 -2.595026  
 H 6.802630 1.985435 -3.106981  
 H 5.860922 3.475331 -3.205953  
 H 6.475084 2.911031 -1.633444  
 C 4.882688 0.374540 -2.719432  
 H 5.858507 0.126591 -3.125698  
 H 4.720831 -0.213404 -1.812881  
 H 4.122301 0.114623 -3.458299  
 Si -5.642553 1.457978 -0.660082  
 H -6.525315 2.303036 0.181960

H -6.385962 1.085704 -1.888659  
 C -5.155606 -0.120703 0.232894  
 C -5.976255 -1.253368 0.169185  
 C -4.005427 -0.178276 1.032608  
 C -5.675966 -2.398870 0.901425  
 H -6.861230 -1.246912 -0.459941  
 C -3.695999 -1.325945 1.756593  
 H -3.346933 0.681857 1.089221  
 C -4.538287 -2.433301 1.700586  
 H -6.320730 -3.267422 0.837278  
 H -2.798004 -1.361676 2.364456  
 H -4.294943 -3.328310 2.261111  
 C -1.803653 3.945750 -1.742625  
 C -1.881577 2.579020 -2.028044  
 C -2.887616 4.574755 -1.130114  
 C -3.023094 1.865892 -1.697961  
 H -1.056123 2.051874 -2.489483  
 C -4.024279 3.839798 -0.800848  
 H -2.864968 5.631039 -0.900850  
 C -4.119532 2.474437 -1.077197  
 H -3.049681 0.807261 -1.926262  
 H -4.848382 4.355610 -0.319035  
 N -0.574948 4.646512 -2.021326  
 C -0.540532 6.062256 -1.636274  
 H -1.233653 6.658535 -2.236460  
 H -0.787369 6.166518 -0.580370  
 H 0.473718 6.429585 -1.795238  
 C -0.053871 4.458793 -3.388472  
 H 0.937085 4.912001 -3.439710  
 H 0.039948 3.399792 -3.615572  
 H -0.713620 4.932839 -4.119703

**N1-TS6**

| Symbol | X         | Y         | Z         |
|--------|-----------|-----------|-----------|
| H      | -1.229151 | 0.098153  | 1.399480  |
| F      | -4.650757 | 3.660850  | -1.535764 |
| F      | 2.693277  | 2.538210  | -1.612807 |
| F      | -3.357877 | 1.340969  | -1.825028 |
| C      | -3.780481 | 3.272089  | -0.608203 |
| C      | 2.673938  | 0.186966  | -1.672030 |
| C      | 2.066722  | 1.390573  | -1.363640 |
| C      | -3.106466 | 2.066858  | -0.729645 |
| C      | -3.538303 | 4.078432  | 0.489537  |
| F      | 2.593429  | -2.161986 | -1.664794 |

|   |           |           |           |
|---|-----------|-----------|-----------|
| C | 2.010153  | -0.997019 | -1.395729 |
| F | 0.275750  | 2.604786  | -0.555615 |
| C | 0.790087  | 1.397732  | -0.817445 |
| C | 0.733705  | -0.946858 | -0.873382 |
| C | 0.067938  | 0.237585  | -0.565817 |
| C | -2.183313 | 1.624631  | 0.207138  |
| C | -2.621158 | 3.677266  | 1.447498  |
| F | 0.127301  | -2.127168 | -0.677721 |
| C | -1.964754 | 2.471961  | 1.283713  |
| B | -1.426012 | 0.210381  | 0.024482  |
| F | -2.381022 | 4.451054  | 2.502217  |
| F | -1.072200 | 2.126566  | 2.227085  |
| C | -2.421424 | -0.957908 | -0.465130 |
| F | -1.548113 | -1.021945 | -2.657248 |
| F | -3.463741 | -1.026690 | 1.651885  |
| C | -2.420938 | -1.474493 | -1.753131 |
| C | -3.389593 | -1.469935 | 0.384362  |
| C | -3.304633 | -2.455374 | -2.168423 |
| C | -4.283390 | -2.460867 | 0.014921  |
| F | -3.267597 | -2.921318 | -3.413507 |
| F | -5.161094 | -2.945970 | 0.889671  |
| C | -4.238987 | -2.955807 | -1.275770 |
| F | -4.176756 | 5.234216  | 0.622604  |
| F | -5.085648 | -3.903165 | -1.658424 |
| F | 3.864483  | 0.153076  | -2.246431 |
| H | -1.146941 | -0.717111 | 1.444156  |
| C | 0.791091  | -1.775866 | 2.272700  |
| C | 1.651134  | -2.785929 | 1.842040  |
| C | 1.314753  | -0.496110 | 2.504359  |
| C | 3.004624  | -2.517543 | 1.652155  |
| H | 1.280265  | -3.781612 | 1.641460  |
| C | 2.665685  | -0.247622 | 2.320008  |
| H | 0.671126  | 0.314050  | 2.826770  |
| C | 3.545820  | -1.252653 | 1.893548  |
| H | 3.647195  | -3.326995 | 1.321245  |
| H | 3.036179  | 0.751622  | 2.528057  |
| N | -0.619256 | -1.982308 | 2.419134  |
| C | -1.137027 | -1.614617 | 3.749190  |
| H | -2.224297 | -1.570737 | 3.696787  |
| H | -0.836985 | -2.357477 | 4.496028  |
| H | -0.764797 | -0.638846 | 4.052869  |
| C | -1.125408 | -3.300046 | 2.027513  |
| H | -2.211308 | -3.284055 | 2.128184  |
| H | -0.868994 | -3.508908 | 0.990116  |

|    |           |           |           |
|----|-----------|-----------|-----------|
| H  | -0.732036 | -4.093843 | 2.673438  |
| Si | 5.388678  | -0.923155 | 1.738610  |
| H  | 5.812059  | -0.215566 | 2.971944  |
| H  | 6.086495  | -2.225054 | 1.621579  |
| C  | 5.852529  | 0.135501  | 0.261913  |
| C  | 5.440798  | 1.472846  | 0.177020  |
| C  | 6.650519  | -0.377800 | -0.766610 |
| C  | 5.811092  | 2.269370  | -0.901141 |
| H  | 4.828765  | 1.906602  | 0.963593  |
| C  | 7.028995  | 0.417871  | -1.843972 |
| H  | 6.986609  | -1.408992 | -0.726142 |
| C  | 6.608860  | 1.741633  | -1.912056 |
| H  | 5.478548  | 3.299124  | -0.952635 |
| H  | 7.649597  | 0.003963  | -2.630224 |
| H  | 6.900696  | 2.361539  | -2.751662 |

### PhNHMe

| Symbol | X         | Y         | Z         |
|--------|-----------|-----------|-----------|
| C      | -0.162804 | -0.032836 | -0.076771 |
| C      | 0.573408  | -1.226401 | -0.024361 |
| C      | 0.540401  | 1.184906  | -0.053892 |
| C      | 1.962952  | -1.191000 | 0.036151  |
| H      | 0.064436  | -2.182081 | -0.030533 |
| C      | 1.924012  | 1.203141  | 0.010045  |
| H      | -0.014793 | 2.116940  | -0.090798 |
| C      | 2.653560  | 0.015282  | 0.053744  |
| H      | 2.508098  | -2.127456 | 0.074124  |
| H      | 2.437588  | 2.157887  | 0.026689  |
| H      | 3.734827  | 0.032469  | 0.102530  |
| N      | -1.536324 | -0.031267 | -0.177624 |
| C      | -2.316715 | -1.227494 | 0.052931  |
| H      | -3.372866 | -0.968245 | 0.004497  |
| H      | -2.119648 | -1.971514 | -0.723041 |
| H      | -2.110509 | -1.684898 | 1.028742  |
| H      | -1.982543 | 0.840968  | 0.058317  |

### add3

| Symbol | X         | Y         | Z         |
|--------|-----------|-----------|-----------|
| B      | -0.073540 | -0.129101 | 0.446908  |
| C      | 1.176551  | -1.004353 | -0.132284 |
| C      | 2.336741  | -0.408114 | -0.620000 |
| C      | 3.442113  | -1.122011 | -1.049113 |
| C      | 3.421143  | -2.504662 | -0.998928 |
| C      | 2.296980  | -3.146729 | -0.513957 |

|   |           |           |           |
|---|-----------|-----------|-----------|
| C | 1.212948  | -2.392803 | -0.091850 |
| C | -0.375250 | 1.259528  | -0.376867 |
| C | -1.143989 | 2.271778  | 0.184210  |
| C | -1.530276 | 3.425349  | -0.472872 |
| C | -1.177947 | 3.586335  | -1.800475 |
| C | -0.458478 | 2.587482  | -2.429436 |
| C | -0.083566 | 1.452793  | -1.724756 |
| C | -1.533658 | -0.885752 | 0.437673  |
| C | -1.929744 | -1.544040 | -0.723908 |
| C | -3.178099 | -2.110001 | -0.902814 |
| C | -4.118005 | -2.017312 | 0.110399  |
| C | -3.785825 | -1.356991 | 1.276489  |
| C | -2.520073 | -0.804668 | 1.410659  |
| F | 2.447408  | 0.924493  | -0.676296 |
| F | 4.527398  | -0.491852 | -1.493678 |
| F | 4.473233  | -3.206744 | -1.402399 |
| F | 2.268282  | -4.476092 | -0.446788 |
| F | 0.176486  | -3.087966 | 0.400722  |
| F | -1.570016 | 2.154158  | 1.461971  |
| F | -2.240515 | 4.361639  | 0.150898  |
| F | -1.537853 | 4.677849  | -2.464840 |
| F | -0.135735 | 2.718534  | -3.713775 |
| F | 0.572686  | 0.530818  | -2.436193 |
| F | -2.290891 | -0.175550 | 2.583654  |
| F | -4.676274 | -1.251881 | 2.259784  |
| F | -5.323690 | -2.552995 | -0.040543 |
| F | -3.487020 | -2.734910 | -2.036028 |
| F | -1.075983 | -1.645615 | -1.750586 |
| N | 0.359229  | 0.186145  | 2.022967  |
| H | -0.406103 | 0.732012  | 2.421659  |
| C | 1.571596  | 1.011315  | 2.156473  |
| C | 1.436468  | 2.394126  | 2.198888  |
| C | 2.829612  | 0.422321  | 2.221212  |
| C | 2.571375  | 3.193068  | 2.269674  |
| H | 0.455729  | 2.851572  | 2.194489  |
| C | 3.958580  | 1.231110  | 2.285786  |
| H | 2.950410  | -0.652221 | 2.209780  |
| C | 3.834993  | 2.615221  | 2.301507  |
| H | 2.460863  | 4.269572  | 2.302621  |
| H | 4.937412  | 0.769747  | 2.323537  |
| H | 4.718145  | 3.239642  | 2.350231  |
| C | 0.444851  | -1.064521 | 2.840261  |
| H | -0.508720 | -1.579519 | 2.805901  |
| H | 1.209813  | -1.717007 | 2.432049  |

|   |          |           |          |
|---|----------|-----------|----------|
| H | 0.693655 | -0.797100 | 3.865477 |
|---|----------|-----------|----------|

## N2-2

| Symbol | X         | Y         | Z         |
|--------|-----------|-----------|-----------|
| Si     | 1.587277  | 0.700004  | -1.504207 |
| H      | -0.144833 | 0.163909  | -0.790214 |
| H      | 1.571391  | 1.704342  | -0.431318 |
| F      | -6.018097 | -0.062592 | -0.132470 |
| F      | -1.331306 | -4.847379 | 1.326630  |
| F      | -3.687735 | 0.111284  | 1.190014  |
| C      | -4.865393 | -0.140484 | -0.798100 |
| C      | 0.495290  | -3.596787 | 2.110443  |
| C      | -0.700781 | -3.674944 | 1.424930  |
| C      | -3.651493 | -0.039283 | -0.142631 |
| C      | -4.876681 | -0.332545 | -2.170313 |
| F      | 2.308220  | -2.291746 | 2.849011  |
| C      | 1.142898  | -2.376396 | 2.205655  |
| F      | -2.379309 | -2.714210 | 0.160476  |
| C      | -1.226714 | -2.537408 | 0.825784  |
| C      | 0.580997  | -1.271361 | 1.598321  |
| C      | -0.607273 | -1.297871 | 0.878336  |
| C      | -2.424981 | -0.119323 | -0.786944 |
| C      | -3.679170 | -0.427898 | -2.854543 |
| F      | 1.266583  | -0.117399 | 1.691312  |
| C      | -2.486505 | -0.322291 | -2.153988 |
| B      | -1.045949 | 0.025853  | 0.053613  |
| F      | -3.683186 | -0.621393 | -4.174758 |
| F      | -1.359416 | -0.444099 | -2.879172 |
| C      | -1.068250 | 1.415982  | 0.895354  |
| F      | -1.344204 | 0.443963  | 3.036993  |
| F      | -0.831014 | 2.611869  | -1.129652 |
| C      | -1.212404 | 1.533268  | 2.269620  |
| C      | -0.963452 | 2.618899  | 0.211020  |
| C      | -1.229712 | 2.753708  | 2.927738  |
| C      | -0.968770 | 3.859333  | 0.825705  |
| F      | -1.366558 | 2.813113  | 4.253015  |
| F      | -0.844322 | 4.981267  | 0.113867  |
| C      | -1.106131 | 3.924873  | 2.201096  |
| F      | -6.032642 | -0.431236 | -2.823219 |
| F      | -1.118188 | 5.103800  | 2.819501  |
| F      | 1.032972  | -4.684847 | 2.658734  |
| H      | 0.720739  | 0.857471  | -2.678688 |
| C      | 2.174663  | -1.025003 | -1.123351 |
| C      | 3.244764  | -1.296276 | -0.258579 |

|   |          |           |           |
|---|----------|-----------|-----------|
| C | 1.441134 | -2.101194 | -1.641296 |
| C | 3.584316 | -2.607182 | 0.057992  |
| H | 3.806097 | -0.487729 | 0.197166  |
| C | 1.771563 | -3.411451 | -1.312756 |
| H | 0.583845 | -1.911632 | -2.280724 |
| C | 2.846369 | -3.664792 | -0.465192 |
| H | 4.408783 | -2.800363 | 0.733507  |
| H | 1.185076 | -4.231962 | -1.708858 |
| H | 3.099065 | -4.685111 | -0.200606 |
| C | 4.386629 | 1.379107  | -1.650311 |
| C | 4.539830 | 2.127392  | -0.488710 |
| C | 5.358132 | 0.474076  | -2.055922 |
| C | 5.685194 | 1.951333  | 0.280077  |
| H | 3.777879 | 2.828455  | -0.171684 |
| C | 6.498599 | 0.305935  | -1.279525 |
| H | 5.218092 | -0.111819 | -2.957793 |
| C | 6.661492 | 1.039750  | -0.109305 |
| H | 5.808148 | 2.526945  | 1.188686  |
| H | 7.254984 | -0.403875 | -1.589513 |
| H | 7.548109 | 0.903914  | 0.496999  |
| N | 3.150714 | 1.483554  | -2.420479 |
| C | 2.835057 | 2.879343  | -2.852293 |
| H | 1.984689 | 2.846190  | -3.530416 |
| H | 2.572796 | 3.472638  | -1.978490 |
| H | 3.701693 | 3.312028  | -3.348772 |
| H | 3.274811 | 0.925802  | -3.267515 |

### N2-3

| Symbol | X         | Y         | Z         |
|--------|-----------|-----------|-----------|
| Si     | -3.487836 | -0.091549 | -2.159516 |
| H      | -0.443665 | 0.204866  | 0.005103  |
| H      | -4.842805 | 0.480847  | -2.200008 |
| F      | 3.389500  | -3.964741 | -1.355379 |
| F      | 4.493629  | 2.930177  | -1.693953 |
| F      | 2.907713  | -2.019664 | 0.401890  |
| C      | 2.435310  | -3.068742 | -1.607728 |
| C      | 2.474754  | 4.001945  | -1.153470 |
| C      | 3.248332  | 2.854825  | -1.223405 |
| C      | 2.157883  | -2.051974 | -0.706611 |
| C      | 1.714604  | -3.155370 | -2.787276 |
| F      | 0.422305  | 5.012534  | -0.593387 |
| C      | 1.187485  | 3.920219  | -0.655831 |
| F      | 3.518988  | 0.577826  | -0.894086 |
| C      | 2.716036  | 1.645607  | -0.806463 |

|   |           |           |           |
|---|-----------|-----------|-----------|
| C | 0.704253  | 2.689809  | -0.240160 |
| C | 1.426310  | 1.509746  | -0.309617 |
| C | 1.172909  | -1.097228 | -0.917081 |
| C | 0.738021  | -2.212259 | -3.051430 |
| F | -0.559422 | 2.682971  | 0.236818  |
| C | 0.502292  | -1.215316 | -2.121221 |
| B | 0.754931  | 0.087789  | 0.118842  |
| F | 0.011909  | -2.290460 | -4.170398 |
| F | -0.473979 | -0.327831 | -2.440955 |
| C | 0.993661  | -0.316276 | 1.676319  |
| F | 3.115264  | 0.712572  | 1.885458  |
| F | -1.075405 | -1.468973 | 1.701268  |
| C | 2.102389  | 0.028231  | 2.435764  |
| C | 0.033727  | -1.061627 | 2.346172  |
| C | 2.248546  | -0.317439 | 3.769909  |
| C | 0.135186  | -1.427667 | 3.678671  |
| F | 3.336022  | 0.039673  | 4.455548  |
| F | -0.827395 | -2.137171 | 4.272360  |
| C | 1.255033  | -1.049287 | 4.397044  |
| F | 1.961951  | -4.130781 | -3.657938 |
| F | 1.378734  | -1.389994 | 5.678628  |
| F | 2.967131  | 5.170097  | -1.558887 |
| H | -2.856057 | -0.195633 | -3.481955 |
| C | -3.294039 | -1.601323 | -1.116293 |
| C | -4.020843 | -1.778448 | 0.070585  |
| C | -2.385543 | -2.593363 | -1.508914 |
| C | -3.815754 | -2.903736 | 0.858214  |
| H | -4.746684 | -1.034824 | 0.383971  |
| C | -2.178275 | -3.716957 | -0.717640 |
| H | -1.848980 | -2.495424 | -2.446120 |
| C | -2.888327 | -3.866475 | 0.468843  |
| H | -4.374192 | -3.028591 | 1.777768  |
| H | -1.466605 | -4.472598 | -1.028159 |
| H | -2.722930 | -4.737894 | 1.090948  |
| C | -3.299892 | 1.780829  | -0.132537 |
| C | -4.274663 | 2.758358  | -0.279716 |
| C | -3.038521 | 1.192926  | 1.098569  |
| C | -4.996518 | 3.159416  | 0.839326  |
| H | -4.475365 | 3.210116  | -1.243082 |
| C | -3.770126 | 1.601911  | 2.207467  |
| H | -2.280401 | 0.423216  | 1.188396  |
| C | -4.747080 | 2.583736  | 2.080503  |
| H | -5.754648 | 3.925189  | 0.735262  |
| H | -3.568596 | 1.151505  | 3.171308  |



|   |           |          |           |
|---|-----------|----------|-----------|
| H | -5.311511 | 2.902284 | 2.947864  |
| N | -2.543370 | 1.304271 | -1.303482 |
| C | -2.154834 | 2.378735 | -2.273985 |
| H | -1.362407 | 1.981805 | -2.905365 |
| H | -3.011619 | 2.648398 | -2.889369 |
| H | -1.805234 | 3.245739 | -1.717449 |
| H | -1.666063 | 0.900910 | -0.936651 |

**N2-4**

| Symbol | X         | Y         | Z         |
|--------|-----------|-----------|-----------|
| F      | 0.899576  | 5.355081  | -1.446118 |
| F      | 5.004204  | 0.115203  | -1.957669 |
| F      | 0.533149  | 2.747133  | -2.036212 |
| C      | 0.841416  | 4.451588  | -0.473242 |
| C      | 3.659611  | -1.803008 | -1.815708 |
| C      | 3.832906  | -0.441044 | -1.660878 |
| C      | 0.645446  | 3.112756  | -0.753956 |
| C      | 0.983009  | 4.848922  | 0.847707  |
| F      | 2.275009  | -3.693114 | -1.621324 |
| C      | 2.440544  | -2.380135 | -1.498869 |
| F      | 3.035497  | 1.641960  | -1.052361 |
| C      | 2.787793  | 0.335111  | -1.178688 |
| C      | 1.431404  | -1.576212 | -1.013783 |
| C      | 1.552904  | -0.202053 | -0.841822 |
| C      | 0.588994  | 2.135998  | 0.229567  |
| C      | 0.931118  | 3.906919  | 1.859626  |
| F      | 0.273123  | -2.169577 | -0.685980 |
| C      | 0.739013  | 2.574155  | 1.532778  |
| B      | 0.319746  | 0.625635  | -0.246723 |
| F      | 1.065136  | 4.284197  | 3.127324  |
| F      | 0.690639  | 1.695693  | 2.550375  |
| C      | -1.139322 | 0.445408  | -0.898116 |
| F      | -0.397081 | -0.591854 | -2.896593 |
| F      | -2.092288 | 1.447047  | 1.009759  |
| C      | -1.390910 | -0.110441 | -2.145655 |
| C      | -2.251113 | 0.930734  | -0.218315 |
| C      | -2.667710 | -0.195014 | -2.676939 |
| C      | -3.536278 | 0.882658  | -0.722305 |
| F      | -2.871248 | -0.762080 | -3.863277 |
| F      | -4.562451 | 1.369255  | -0.033682 |
| C      | -3.742551 | 0.302817  | -1.961945 |
| F      | 1.170429  | 6.129549  | 1.139715  |
| F      | -4.970002 | 0.203694  | -2.452200 |
| F      | 4.662065  | -2.562939 | -2.235355 |

|    |           |           |           |
|----|-----------|-----------|-----------|
| H  | -0.227302 | -0.271956 | 0.927873  |
| Si | -0.443879 | -3.003386 | 2.499441  |
| H  | 0.441695  | 0.076497  | 1.140288  |
| H  | -0.877253 | -4.116876 | 1.636440  |
| C  | 1.366918  | -2.658077 | 2.141137  |
| C  | 2.121041  | -3.664684 | 1.523079  |
| C  | 2.017327  | -1.458853 | 2.466143  |
| C  | 3.470282  | -3.480091 | 1.233739  |
| H  | 1.649173  | -4.602918 | 1.248394  |
| C  | 3.357630  | -1.256620 | 2.149665  |
| H  | 1.486691  | -0.662363 | 2.977836  |
| C  | 4.086682  | -2.269368 | 1.532539  |
| H  | 4.031872  | -4.270964 | 0.749730  |
| H  | 3.833508  | -0.313827 | 2.393645  |
| H  | 5.131055  | -2.115131 | 1.286191  |
| H  | -0.612729 | -3.354121 | 3.931040  |
| C  | -2.693537 | -1.725938 | 1.494939  |
| C  | -3.886361 | -1.148842 | 1.946818  |
| C  | -2.717306 | -2.428481 | 0.277611  |
| C  | -5.063532 | -1.290955 | 1.213603  |
| H  | -3.913638 | -0.585398 | 2.868982  |
| C  | -3.895216 | -2.568032 | -0.438910 |
| H  | -1.802063 | -2.851275 | -0.114939 |
| C  | -5.083294 | -2.001159 | 0.022424  |
| H  | -5.970455 | -0.828971 | 1.585472  |
| H  | -3.880146 | -3.110196 | -1.378043 |
| H  | -5.999579 | -2.103367 | -0.545144 |
| N  | -1.472676 | -1.587227 | 2.205674  |
| C  | -1.505276 | -0.675213 | 3.359480  |
| H  | -0.501603 | -0.576541 | 3.775388  |
| H  | -1.836577 | 0.317041  | 3.051675  |
| H  | -2.159966 | -1.040101 | 4.158911  |

**N2-5**

| Symbol | X         | Y         | Z        |
|--------|-----------|-----------|----------|
| Si     | -1.329743 | -4.720186 | 5.224329 |
| H      | -1.693618 | -6.095049 | 4.806914 |
| C      | 0.029254  | -4.098209 | 4.091561 |
| C      | 1.089792  | -4.930087 | 3.713022 |
| C      | 0.011952  | -2.781837 | 3.616952 |
| C      | 2.109821  | -4.458576 | 2.893029 |
| H      | 1.122533  | -5.960159 | 4.056613 |
| C      | 1.028462  | -2.306961 | 2.793578 |
| H      | -0.811159 | -2.126177 | 3.886212 |

|   |           |           |          |
|---|-----------|-----------|----------|
| C | 2.079311  | -3.144964 | 2.433170 |
| H | 2.924529  | -5.114391 | 2.609151 |
| H | 0.999512  | -1.286210 | 2.430705 |
| H | 2.871054  | -2.777011 | 1.791151 |
| H | -0.888146 | -4.730451 | 6.634501 |
| C | -3.522908 | -3.509160 | 4.046443 |
| C | -4.681453 | -2.713867 | 4.059274 |
| C | -3.196638 | -4.165104 | 2.842864 |
| C | -5.473591 | -2.591508 | 2.922005 |
| H | -4.976182 | -2.187871 | 4.956263 |
| C | -3.996885 | -4.035520 | 1.718508 |
| H | -2.304093 | -4.776047 | 2.773785 |
| C | -5.145033 | -3.247582 | 1.743185 |
| H | -6.361219 | -1.970794 | 2.968108 |
| H | -3.713047 | -4.554830 | 0.810455 |
| H | -5.765675 | -3.147459 | 0.861804 |
| N | -2.713894 | -3.649124 | 5.178708 |
| C | -3.086269 | -2.882678 | 6.365130 |
| H | -2.358024 | -3.057163 | 7.154517 |
| H | -3.104514 | -1.809625 | 6.150198 |
| H | -4.071622 | -3.177398 | 6.740131 |

## N2-6

| Symbol | X         | Y         | Z         |
|--------|-----------|-----------|-----------|
| Si     | -1.684602 | -0.534588 | -1.507963 |
| H      | 1.077787  | -0.245068 | -1.188746 |
| H      | -0.953405 | -1.471910 | -2.387893 |
| F      | 4.230766  | 4.413532  | -1.554118 |
| F      | 0.960646  | 0.167181  | 4.599186  |
| F      | 4.262869  | 1.783332  | -1.394345 |
| C      | 3.166502  | 3.781136  | -1.054596 |
| C      | 0.626100  | -1.846435 | 3.435113  |
| C      | 1.011933  | -0.520423 | 3.452860  |
| C      | 3.152894  | 2.394753  | -0.951126 |
| C      | 2.068615  | 4.512232  | -0.646960 |
| F      | 0.305910  | -3.833590 | 2.219579  |
| C      | 0.669922  | -2.548674 | 2.243972  |
| F      | 1.829417  | 1.366763  | 2.393011  |
| C      | 1.442212  | 0.084578  | 2.279756  |
| C      | 1.073572  | -1.895348 | 1.093899  |
| C      | 1.471301  | -0.562873 | 1.054909  |
| C      | 2.082928  | 1.670889  | -0.442549 |
| C      | 0.974085  | 3.836982  | -0.135556 |
| F      | 1.050995  | -2.616648 | -0.039900 |

|   |           |           |           |
|---|-----------|-----------|-----------|
| C | 1.009862  | 2.459235  | -0.044345 |
| B | 1.941399  | 0.041933  | -0.392197 |
| F | -0.108476 | 4.524649  | 0.257198  |
| F | -0.090062 | 1.877428  | 0.471487  |
| C | 3.299921  | -0.761551 | -0.799267 |
| F | 4.450761  | 0.172359  | 1.030181  |
| F | 2.342627  | -1.819832 | -2.695283 |
| C | 4.443332  | -0.666270 | -0.019465 |
| C | 3.384016  | -1.636548 | -1.868543 |
| C | 5.604646  | -1.372817 | -0.270060 |
| C | 4.527704  | -2.370019 | -2.157640 |
| F | 6.683183  | -1.236865 | 0.506371  |
| F | 4.562459  | -3.203157 | -3.202407 |
| C | 5.643495  | -2.236741 | -1.353420 |
| F | 2.058585  | 5.840995  | -0.747293 |
| F | 6.750944  | -2.931542 | -1.617164 |
| F | 0.182291  | -2.436796 | 4.546479  |
| H | -1.114144 | 0.824576  | -1.513114 |
| C | -1.951556 | -1.251259 | 0.185298  |
| C | -2.179225 | -2.627878 | 0.312568  |
| C | -2.043814 | -0.446091 | 1.327061  |
| C | -2.519352 | -3.181468 | 1.541476  |
| H | -2.099656 | -3.274451 | -0.556097 |
| C | -2.380744 | -0.999708 | 2.558614  |
| H | -1.841018 | 0.616254  | 1.261278  |
| C | -2.626615 | -2.366023 | 2.664795  |
| H | -2.689198 | -4.247911 | 1.626561  |
| H | -2.439432 | -0.364678 | 3.436068  |
| H | -2.881819 | -2.798440 | 3.625259  |
| C | -4.355823 | -1.195626 | -2.113293 |
| C | -4.877979 | -1.966418 | -3.153907 |
| C | -4.925388 | -1.308752 | -0.837868 |
| C | -5.946272 | -2.829558 | -2.919257 |
| H | -4.458852 | -1.905636 | -4.149388 |
| C | -5.986266 | -2.174084 | -0.612074 |
| H | -4.518594 | -0.729601 | -0.016402 |
| C | -6.505886 | -2.939378 | -1.653519 |
| H | -6.336685 | -3.420214 | -3.739343 |
| H | -6.406399 | -2.248843 | 0.383953  |
| H | -7.335676 | -3.612406 | -1.477770 |
| N | -3.291583 | -0.253005 | -2.312008 |
| C | -3.064827 | 0.135903  | -3.718864 |
| H | -2.367496 | 0.976389  | -3.743046 |
| H | -2.634852 | -0.673707 | -4.315777 |

|   |           |          |           |
|---|-----------|----------|-----------|
| H | -4.004890 | 0.447121 | -4.180705 |
| H | -3.902448 | 1.131821 | -1.713807 |
| C | -4.082152 | 2.276767 | 0.041684  |
| C | -4.914822 | 1.754483 | 1.022639  |
| C | -2.926249 | 2.973829 | 0.364062  |
| C | -4.569250 | 1.937082 | 2.357220  |
| H | -5.818030 | 1.215312 | 0.767265  |
| C | -2.595517 | 3.155155 | 1.702458  |
| H | -2.281717 | 3.369216 | -0.413307 |
| C | -3.414899 | 2.635120 | 2.698195  |
| H | -5.208424 | 1.529833 | 3.130308  |
| H | -1.689783 | 3.691346 | 1.953379  |
| H | -3.154332 | 2.773251 | 3.740106  |
| N | -4.380699 | 2.066340 | -1.381085 |
| C | -5.822200 | 2.021284 | -1.762812 |
| H | -5.880882 | 2.030065 | -2.849025 |
| H | -6.259345 | 1.100006 | -1.386718 |
| H | -6.329991 | 2.889154 | -1.347686 |
| H | -3.928783 | 2.816549 | -1.906874 |

#### N2-7

| Symbol | X         | Y         | Z         |
|--------|-----------|-----------|-----------|
| H      | 0.046699  | -0.029298 | 1.446185  |
| F      | 5.140806  | -2.144429 | 0.201396  |
| F      | -2.146645 | -2.192693 | -3.384466 |
| F      | 3.611540  | -0.003862 | 0.041870  |
| C      | 3.818989  | -2.282443 | 0.320697  |
| C      | -3.022054 | -0.275961 | -2.351559 |
| C      | -2.014593 | -1.212112 | -2.489915 |
| C      | 2.983791  | -1.174876 | 0.232787  |
| C      | 3.279672  | -3.533771 | 0.541182  |
| F      | -3.824271 | 1.667980  | -1.291378 |
| C      | -2.867229 | 0.749232  | -1.434989 |
| F      | 0.057974  | -2.060433 | -1.926969 |
| C      | -0.873300 | -1.123014 | -1.702867 |
| C      | -1.719366 | 0.785192  | -0.666497 |
| C      | -0.689857 | -0.145135 | -0.735651 |
| C      | 1.602535  | -1.247679 | 0.343614  |
| C      | 1.906875  | -3.659813 | 0.674343  |
| F      | -1.646438 | 1.789548  | 0.240686  |
| C      | 1.118255  | -2.529772 | 0.579321  |
| B      | 0.546913  | -0.000873 | 0.334234  |
| F      | 1.367719  | -4.860702 | 0.893704  |
| F      | -0.208625 | -2.719067 | 0.721134  |

|   |           |           |           |
|---|-----------|-----------|-----------|
| C | 1.212875  | 1.465498  | 0.108384  |
| F | 2.005500  | 0.841786  | -2.017074 |
| F | 0.442448  | 2.323098  | 2.185253  |
| C | 1.861599  | 1.785219  | -1.075480 |
| C | 1.098374  | 2.503162  | 1.014145  |
| C | 2.391309  | 3.034458  | -1.342131 |
| C | 1.606536  | 3.774466  | 0.793656  |
| F | 3.019554  | 3.289134  | -2.490314 |
| F | 1.463714  | 4.740167  | 1.703940  |
| C | 2.261390  | 4.038648  | -0.394813 |
| F | 4.066359  | -4.604348 | 0.630831  |
| F | 2.759187  | 5.250691  | -0.631531 |
| F | -4.129280 | -0.359141 | -3.086035 |
| H | -1.150855 | 0.917774  | 2.263223  |
| C | -3.019320 | 0.101574  | 2.072550  |
| C | -4.225751 | 0.668956  | 1.701107  |
| C | -2.665861 | -1.192080 | 1.721006  |
| C | -5.108914 | -0.090015 | 0.939523  |
| H | -4.467176 | 1.690434  | 1.972817  |
| C | -3.550751 | -1.933796 | 0.948758  |
| H | -1.703460 | -1.602545 | 1.997882  |
| C | -4.768826 | -1.383459 | 0.557554  |
| H | -6.051224 | 0.342066  | 0.628603  |
| H | -3.276431 | -2.935903 | 0.643935  |
| H | -5.450326 | -1.960934 | -0.054877 |
| N | -2.034419 | 0.919187  | 2.802295  |
| C | -1.756127 | 0.468516  | 4.200633  |
| H | -1.026498 | 1.145902  | 4.637746  |
| H | -2.689054 | 0.484429  | 4.757657  |
| H | -1.355839 | -0.540793 | 4.158139  |
| H | -2.346857 | 1.893383  | 2.809855  |

#### N2-8

| Symbol | X         | Y         | Z         |
|--------|-----------|-----------|-----------|
| H      | -0.758827 | 0.182080  | 2.314631  |
| F      | -4.090041 | 3.656614  | -1.138729 |
| F      | 3.400219  | 0.430172  | -2.820865 |
| F      | -3.448964 | 1.074153  | -1.181691 |
| C      | -2.881620 | 3.271453  | -0.744775 |
| C      | 3.145399  | -1.429868 | -1.412523 |
| C      | 2.661823  | -0.250087 | -1.950254 |
| C      | -2.523580 | 1.935530  | -0.758777 |
| C      | -1.966493 | 4.214916  | -0.307251 |
| F      | 2.882019  | -3.227818 | 0.073911  |

|   |           |           |           |
|---|-----------|-----------|-----------|
| C | 2.395948  | -2.118242 | -0.472393 |
| F | 0.983286  | 1.325940  | -2.154662 |
| C | 1.410453  | 0.202429  | -1.574288 |
| C | 1.150381  | -1.639377 | -0.118609 |
| C | 0.598318  | -0.480679 | -0.667908 |
| C | -1.263088 | 1.485336  | -0.366615 |
| C | -0.703599 | 3.815611  | 0.098975  |
| F | 0.471128  | -2.345493 | 0.787658  |
| C | -0.373272 | 2.475169  | 0.047605  |
| B | -0.868319 | -0.031982 | -0.358642 |
| F | 0.173297  | 4.717120  | 0.526698  |
| F | 0.857976  | 2.148514  | 0.444668  |
| C | -1.970548 | -1.117058 | -0.079808 |
| F | -1.032907 | -2.665539 | -1.607430 |
| F | -3.093901 | 0.258051  | 1.486207  |
| C | -1.974938 | -2.357846 | -0.714879 |
| C | -3.009865 | -0.898509 | 0.823437  |
| C | -2.940598 | -3.319368 | -0.478205 |
| C | -3.978801 | -1.844003 | 1.101454  |
| F | -2.912730 | -4.483639 | -1.117051 |
| F | -4.939934 | -1.597494 | 1.984407  |
| C | -3.944977 | -3.060412 | 0.439169  |
| F | -2.298016 | 5.494618  | -0.277159 |
| F | -4.871053 | -3.973080 | 0.683005  |
| F | 4.318055  | -1.903292 | -1.798001 |
| H | -0.036723 | 0.004424  | 2.251811  |
| N | 2.391715  | 0.108758  | 2.824984  |
| C | 1.966428  | 1.367487  | 3.423233  |
| H | 1.448319  | 1.985611  | 2.689829  |
| H | 1.264722  | 1.148845  | 4.226840  |
| H | 2.808584  | 1.939880  | 3.830434  |
| C | 3.465677  | 0.111069  | 1.938570  |
| C | 3.757749  | 1.223884  | 1.139027  |
| C | 4.269478  | -1.034503 | 1.813060  |
| C | 4.816984  | 1.179267  | 0.236189  |
| H | 3.156547  | 2.120344  | 1.214975  |
| C | 5.325352  | -1.062998 | 0.916360  |
| H | 4.050727  | -1.903835 | 2.425162  |
| C | 5.609173  | 0.044207  | 0.116220  |
| H | 5.019885  | 2.048452  | -0.379277 |
| H | 5.928049  | -1.960317 | 0.835583  |
| H | 6.428690  | 0.015646  | -0.590563 |
| H | 2.452994  | -0.642410 | 3.498124  |

## N2-9

| Symbol | X         | Y         | Z         |
|--------|-----------|-----------|-----------|
| Si     | -1.935904 | 0.433496  | -2.035989 |
| H      | 0.614067  | 0.105511  | -1.279795 |
| H      | -1.295148 | -0.479820 | -2.997612 |
| F      | 4.455249  | 4.179177  | -0.301731 |
| F      | -0.355337 | -0.233078 | 4.425184  |
| F      | 4.085275  | 1.590761  | -0.656878 |
| C      | 3.237381  | 3.665241  | -0.112512 |
| C      | -0.811004 | -1.979233 | 2.920542  |
| C      | -0.226879 | -0.759845 | 3.202996  |
| C      | 3.010262  | 2.304783  | -0.285694 |
| C      | 2.196361  | 4.495376  | 0.252833  |
| F      | -1.231475 | -3.698277 | 1.371593  |
| C      | -0.677612 | -2.515264 | 1.652180  |
| F      | 1.038070  | 1.073338  | 2.581922  |
| C      | 0.482699  | -0.092959 | 2.213222  |
| C      | 0.012286  | -1.800866 | 0.689834  |
| C      | 0.612228  | -0.567272 | 0.917272  |
| C      | 1.772120  | 1.706359  | -0.102846 |
| C      | 0.936975  | 3.950210  | 0.438938  |
| F      | 0.063649  | -2.348814 | -0.537167 |
| C      | 0.763983  | 2.592043  | 0.257981  |
| B      | 1.384765  | 0.136245  | -0.343937 |
| F      | -0.085527 | 4.737207  | 0.786188  |
| F      | -0.482435 | 2.117758  | 0.450728  |
| C      | 2.648999  | -0.827470 | -0.698832 |
| F      | 3.655472  | -0.336121 | 1.371971  |
| F      | 1.810346  | -1.478340 | -2.819819 |
| C      | 3.670594  | -1.024546 | 0.218877  |
| C      | 2.745247  | -1.572434 | -1.861405 |
| C      | 4.732466  | -1.885275 | 0.012297  |
| C      | 3.790516  | -2.452135 | -2.111453 |
| F      | 5.697260  | -2.031649 | 0.924233  |
| F      | 3.841354  | -3.151368 | -3.249559 |
| C      | 4.789143  | -2.608190 | -1.168912 |
| F      | 2.397223  | 5.802592  | 0.418782  |
| F      | 5.800273  | -3.448203 | -1.393389 |
| F      | -1.520567 | -2.622403 | 3.849600  |
| H      | -1.222312 | 1.696978  | -1.818203 |
| C      | -2.615296 | -0.432106 | -0.536276 |
| C      | -3.025665 | -1.767070 | -0.657913 |
| C      | -2.867895 | 0.236938  | 0.670523  |
| C      | -3.687122 | -2.410786 | 0.382351  |

|   |           |           |           |
|---|-----------|-----------|-----------|
| H | -2.829427 | -2.313238 | -1.575371 |
| C | -3.511138 | -0.413002 | 1.719603  |
| H | -2.557347 | 1.267526  | 0.801553  |
| C | -3.932509 | -1.732357 | 1.572411  |
| H | -3.989723 | -3.445017 | 0.272422  |
| H | -3.679766 | 0.109908  | 2.654364  |
| H | -4.431794 | -2.236272 | 2.391851  |
| C | -5.692841 | 0.271539  | -1.361257 |
| C | -5.174384 | 1.605826  | -1.266674 |
| C | -5.328775 | -0.539206 | -2.489211 |
| C | -4.184206 | 1.994999  | -2.107804 |
| H | -5.555854 | 2.280974  | -0.513246 |
| C | -4.335945 | -0.135737 | -3.314914 |
| H | -5.834154 | -1.486122 | -2.636848 |
| C | -3.587898 | 1.077683  | -3.055056 |
| H | -3.769503 | 2.993336  | -2.023156 |
| H | -4.034079 | -0.763419 | -4.145980 |
| H | -3.096409 | 1.531753  | -3.915528 |
| N | -6.507770 | -0.214818 | -0.442286 |
| C | -6.933430 | 0.496252  | 0.755695  |
| H | -7.480502 | -0.198814 | 1.386575  |
| H | -6.062361 | 0.860384  | 1.302628  |
| H | -7.585180 | 1.333753  | 0.500373  |
| H | -6.828757 | -1.166021 | -0.560187 |

#### N2-10

| Symbol | X         | Y         | Z         |
|--------|-----------|-----------|-----------|
| Si     | -1.462472 | -1.716186 | 0.270896  |
| H      | -1.582434 | -2.787096 | -0.751517 |
| H      | -1.721880 | -2.332830 | 1.597877  |
| C      | -2.771906 | -0.389417 | 0.024488  |
| C      | -2.570492 | 0.664381  | -0.876933 |
| C      | -3.983925 | -0.436723 | 0.723858  |
| C      | -3.549052 | 1.632437  | -1.079003 |
| H      | -1.633957 | 0.734037  | -1.422404 |
| C      | -4.966923 | 0.528509  | 0.524895  |
| H      | -4.163874 | -1.234737 | 1.437773  |
| C      | -4.750018 | 1.564294  | -0.378342 |
| H      | -3.374951 | 2.440657  | -1.779825 |
| H      | -5.898331 | 0.475000  | 1.076504  |
| H      | -5.512521 | 2.318757  | -0.533056 |
| C      | 2.866699  | 0.098387  | -0.034123 |
| C      | 2.566438  | -1.148467 | -0.606762 |
| C      | 1.830686  | 0.801676  | 0.618361  |

|   |           |           |           |
|---|-----------|-----------|-----------|
| C | 1.276949  | -1.663441 | -0.521145 |
| H | 3.337633  | -1.705841 | -1.122792 |
| C | 0.561075  | 0.268072  | 0.696148  |
| H | 2.052849  | 1.771428  | 1.051168  |
| C | 0.246091  | -0.983143 | 0.131325  |
| H | 1.076676  | -2.626980 | -0.980820 |
| H | -0.213752 | 0.837624  | 1.201493  |
| N | 4.118840  | 0.650887  | -0.124289 |
| C | 5.260556  | -0.112162 | -0.576062 |
| H | 6.156258  | 0.492512  | -0.450871 |
| H | 5.388386  | -1.046769 | -0.015100 |
| H | 5.167776  | -0.364247 | -1.636404 |
| H | 4.309281  | 1.418240  | 0.499529  |

#### N2-11

| Symbol | X         | Y         | Z         |
|--------|-----------|-----------|-----------|
| F      | 3.048818  | 4.687678  | -1.167159 |
| F      | 5.448048  | -1.319154 | -1.131566 |
| F      | 2.040168  | 2.246878  | -1.687555 |
| C      | 2.573811  | 3.931154  | -0.174419 |
| C      | 3.599603  | -2.736083 | -1.433616 |
| C      | 4.130930  | -1.522394 | -1.044052 |
| C      | 2.044472  | 2.676929  | -0.414866 |
| C      | 2.610945  | 4.404769  | 1.127717  |
| F      | 1.704101  | -4.101248 | -1.706188 |
| C      | 2.232736  | -2.930640 | -1.339378 |
| F      | 3.911335  | 0.614864  | -0.209908 |
| C      | 3.292329  | -0.523080 | -0.565305 |
| C      | 1.443816  | -1.914346 | -0.836287 |
| C      | 1.916567  | -0.667928 | -0.444878 |
| C      | 1.548250  | 1.847138  | 0.579990  |
| C      | 2.122629  | 3.617124  | 2.153111  |
| F      | 0.129414  | -2.182731 | -0.731090 |
| C      | 1.602744  | 2.362427  | 1.863097  |
| B      | 0.876281  | 0.409604  | 0.209262  |
| F      | 2.153657  | 4.073374  | 3.408723  |
| F      | 1.140033  | 1.658427  | 2.908456  |
| C      | -0.441144 | 0.758505  | -0.712180 |
| F      | 0.236936  | -0.275553 | -2.739294 |
| F      | -1.345983 | 1.898190  | 1.154726  |
| C      | -0.667743 | 0.423227  | -2.040081 |
| C      | -1.450526 | 1.523999  | -0.133046 |
| C      | -1.817814 | 0.776126  | -2.735596 |
| C      | -2.597385 | 1.923761  | -0.796207 |

F -1.992042 0.397746 -4.003462  
 F -3.543777 2.644316 -0.181930  
 C -2.790594 1.531699 -2.109077  
 F 3.114387 5.611501 1.387968  
 F -3.915133 1.862842 -2.748479  
 F 4.389303 -3.707995 -1.890937  
 H -1.395680 -0.673823 1.670057  
 Si -2.307286 -2.555201 2.758776  
 H 0.469912 -0.098810 1.230526  
 H -3.532033 -3.366748 2.609316  
 C -0.775243 -3.459305 2.215600  
 C -0.847882 -4.638724 1.465870  
 C 0.483853 -2.899518 2.473465  
 C 0.308918 -5.245216 0.986941  
 H -1.812592 -5.086450 1.248199  
 C 1.640244 -3.506769 1.998471  
 H 0.567815 -1.978818 3.043552  
 C 1.551260 -4.681048 1.256095  
 H 0.241958 -6.152960 0.399576  
 H 2.607634 -3.059062 2.195574  
 H 2.451206 -5.149278 0.873698  
 H -2.185246 -1.965864 4.106651  
 C -4.684983 -0.240331 -0.016529  
 C -4.507428 0.283101 1.309898  
 C -3.764609 -1.222946 -0.519014  
 C -3.410133 -0.061388 2.021265  
 H -5.211297 1.004943 1.699682  
 C -2.668462 -1.549462 0.197512  
 H -3.927209 -1.630161 -1.510408  
 C -2.431316 -1.026031 1.540024  
 H -3.242547 0.394845 2.991041  
 H -1.940688 -2.237594 -0.215418  
 N -5.650243 0.200136 -0.798822  
 C -6.594760 1.258524 -0.457600  
 H -7.230534 1.433648 -1.320408  
 H -7.216181 0.960605 0.387818  
 H -6.056501 2.176227 -0.218124  
 H -5.707631 -0.188713 -1.731062

**N2-12**

| Symbol | X        | Y         | Z         |
|--------|----------|-----------|-----------|
| F      | 1.774201 | 5.006691  | -1.695451 |
| F      | 5.174004 | -0.533696 | -1.753416 |
| F      | 1.209697 | 2.412228  | -2.186866 |

C 1.458323 4.189779 -0.695442  
 C 3.633346 -2.303016 -1.714029  
 C 3.934835 -0.965769 -1.536709  
 C 1.163277 2.860111 -0.925852  
 C 1.423413 4.669518 0.605115  
 F 2.064592 -4.048126 -1.569327  
 C 2.350818 -2.754780 -1.455543  
 F 3.338826 1.172859 -0.912433  
 C 2.952170 -0.091237 -1.098368  
 C 1.396061 -1.851649 -1.034461  
 C 1.644702 -0.495313 -0.850217  
 C 0.842465 1.969088 0.087560  
 C 1.094058 3.817947 1.644180  
 F 0.175221 -2.333228 -0.775437  
 C 0.805917 2.490087 1.369037  
 B 0.468712 0.472318 -0.347714  
 F 1.049012 4.278151 2.891012  
 F 0.466187 1.713593 2.409630  
 C -0.982178 0.380577 -1.034554  
 F -0.283729 -0.792287 -2.973645  
 F -1.895210 1.553685 0.795794  
 C -1.253761 -0.220948 -2.255709  
 C -2.068775 0.981355 -0.402599  
 C -2.528014 -0.253025 -2.803221  
 C -3.344192 0.989866 -0.929966  
 F -2.746661 -0.855261 -3.969641  
 F -4.351974 1.556617 -0.273814  
 C -3.577541 0.352262 -2.135658  
 F 1.702158 5.943523 0.850648  
 F -4.800532 0.316639 -2.644337  
 F 4.577401 -3.155577 -2.087913  
 H -0.217118 -0.149318 0.908091  
 Si -0.439320 -1.613317 3.722882  
 H 0.547261 -0.216674 1.039124  
 H -0.676702 -2.724792 4.676572  
 C 1.203441 -1.946317 2.858982  
 C 1.486144 -3.210787 2.319579  
 C 2.187425 -0.952114 2.751096  
 C 2.702873 -3.473214 1.698297  
 H 0.756905 -4.011336 2.401691  
 C 3.404047 -1.207457 2.120196  
 H 2.008123 0.031849 3.172425  
 C 3.664823 -2.470597 1.599639  
 H 2.902120 -4.458664 1.292721

|   |           |           |           |
|---|-----------|-----------|-----------|
| H | 4.149525  | -0.423526 | 2.045570  |
| H | 4.616211  | -2.676168 | 1.121470  |
| H | -0.338517 | -0.337645 | 4.470371  |
| C | -4.087017 | -1.457451 | 0.739937  |
| C | -4.050605 | -0.638451 | 1.880404  |
| C | -2.982171 | -2.291163 | 0.484268  |
| C | -2.947930 | -0.662141 | 2.725234  |
| H | -4.876081 | 0.026811  | 2.098271  |
| C | -1.902878 | -2.313761 | 1.348781  |
| H | -2.985380 | -2.921757 | -0.399499 |
| C | -1.848596 | -1.498556 | 2.493397  |
| H | -2.951337 | -0.003578 | 3.588672  |
| H | -1.077335 | -2.978036 | 1.117097  |
| N | -5.130287 | -1.409825 | -0.156930 |
| C | -6.408370 | -0.814790 | 0.187937  |
| H | -7.096584 | -0.978857 | -0.639084 |
| H | -6.838623 | -1.246040 | 1.099591  |
| H | -6.302387 | 0.262089  | 0.325843  |
| H | -5.176547 | -2.191334 | -0.793286 |

#### N2-TS1

| Symbol | X         | Y         | Z         |
|--------|-----------|-----------|-----------|
| Si     | 0.995291  | -0.093402 | -1.552077 |
| H      | -0.317239 | 0.027497  | -0.628392 |
| H      | 0.874216  | 1.218004  | -2.208426 |
| F      | -5.507919 | -2.418830 | -0.944187 |
| F      | 0.462305  | -2.139427 | 4.453062  |
| F      | -4.267037 | -0.203564 | -0.170029 |
| C      | -4.191556 | -2.441852 | -0.749759 |
| C      | 1.331978  | -0.047838 | 3.834787  |
| C      | 0.455315  | -1.095261 | 3.625544  |
| C      | -3.516747 | -1.296064 | -0.351452 |
| C      | -3.490300 | -3.617198 | -0.943813 |
| F      | 2.152192  | 2.054216  | 3.176898  |
| C      | 1.315807  | 1.038747  | 2.976417  |
| F      | -1.241708 | -2.102579 | 2.422728  |
| C      | -0.421159 | -1.052944 | 2.550406  |
| C      | 0.434724  | 1.037380  | 1.913425  |
| C      | -0.454809 | 0.000293  | 1.646281  |
| C      | -2.146314 | -1.269156 | -0.130977 |
| C      | -2.121125 | -3.639143 | -0.730406 |
| F      | 0.487251  | 2.089349  | 1.083189  |
| C      | -1.492581 | -2.478248 | -0.326791 |
| B      | -1.324105 | 0.044692  | 0.299774  |

|   |           |           |           |
|---|-----------|-----------|-----------|
| F | -1.437194 | -4.766871 | -0.907602 |
| F | -0.167664 | -2.546006 | -0.107756 |
| C | -2.017426 | 1.433593  | -0.111331 |
| F | -2.244951 | 2.233639  | 2.102939  |
| F | -1.913919 | 0.812357  | -2.385447 |
| C | -2.425319 | 2.405941  | 0.788555  |
| C | -2.265756 | 1.710275  | -1.448528 |
| C | -3.034716 | 3.586004  | 0.392236  |
| C | -2.863927 | 2.877165  | -1.887677 |
| F | -3.411282 | 4.492860  | 1.291131  |
| F | -3.071526 | 3.097692  | -3.184084 |
| C | -3.254562 | 3.822065  | -0.953584 |
| F | -4.123082 | -4.719463 | -1.327197 |
| F | -3.835814 | 4.949581  | -1.347849 |
| F | 2.193474  | -0.084656 | 4.844797  |
| H | 0.544074  | -1.274010 | -2.290886 |
| C | 2.318263  | -0.167690 | -0.261405 |
| C | 3.057757  | 0.997802  | -0.014288 |
| C | 2.573929  | -1.307295 | 0.510897  |
| C | 4.022993  | 1.025032  | 0.983574  |
| H | 2.875937  | 1.892305  | -0.600020 |
| C | 3.536977  | -1.276223 | 1.515316  |
| H | 2.019401  | -2.222109 | 0.339891  |
| C | 4.255631  | -0.109391 | 1.756348  |
| H | 4.586345  | 1.932287  | 1.164263  |
| H | 3.719278  | -2.160961 | 2.114236  |
| H | 4.996168  | -0.083389 | 2.547231  |
| C | 4.164544  | -0.131084 | -2.776456 |
| C | 4.478510  | 1.204486  | -3.045994 |
| C | 5.029425  | -0.892056 | -1.989547 |
| C | 5.637770  | 1.768477  | -2.533677 |
| H | 3.802737  | 1.797745  | -3.653980 |
| C | 6.186334  | -0.314528 | -1.475522 |
| H | 4.795759  | -1.922252 | -1.753560 |
| C | 6.499331  | 1.012774  | -1.741851 |
| H | 5.868051  | 2.804289  | -2.753542 |
| H | 6.842997  | -0.913244 | -0.855151 |
| H | 7.402229  | 1.454697  | -1.339299 |
| N | 2.937418  | -0.653185 | -3.253457 |
| C | 2.811815  | -2.111368 | -3.336048 |
| H | 3.714612  | -2.577904 | -3.740499 |
| H | 2.612422  | -2.527602 | -2.343368 |
| H | 1.967879  | -2.349923 | -3.982637 |
| H | 2.672669  | -0.209810 | -4.124902 |

**N2-TS2**

| Symbol | X         | Y         | Z         |
|--------|-----------|-----------|-----------|
| F      | 0.083016  | 5.409005  | -1.462699 |
| F      | 4.886603  | 0.757772  | -1.971192 |
| F      | 0.022706  | 2.774692  | -2.029367 |
| C      | 0.196654  | 4.513412  | -0.486469 |
| C      | 3.808977  | -1.320974 | -1.818386 |
| C      | 3.798306  | 0.052539  | -1.672625 |
| C      | 0.157092  | 3.158025  | -0.753915 |
| C      | 0.364841  | 4.937401  | 0.822835  |
| F      | 2.679822  | -3.375466 | -1.635270 |
| C      | 2.675048  | -2.052628 | -1.503619 |
| F      | 2.731843  | 2.015702  | -1.081924 |
| C      | 2.657350  | 0.686138  | -1.198412 |
| C      | 1.568540  | -1.385144 | -1.024232 |
| C      | 1.505364  | -0.007575 | -0.853743 |
| C      | 0.281150  | 2.189134  | 0.231415  |
| C      | 0.495601  | 4.004485  | 1.835725  |
| F      | 0.499132  | -2.127256 | -0.689253 |
| C      | 0.455231  | 2.655146  | 1.521675  |
| B      | 0.186080  | 0.646075  | -0.218882 |
| F      | 0.658170  | 4.406241  | 3.093344  |
| F      | 0.584550  | 1.788780  | 2.542737  |
| C      | -1.250913 | 0.302856  | -0.853176 |
| F      | -0.431771 | -0.645854 | -2.865166 |
| F      | -2.281886 | 1.194798  | 1.069242  |
| C      | -1.460756 | -0.280433 | -2.095234 |
| C      | -2.399307 | 0.660907  | -0.156642 |
| C      | -2.728748 | -0.518101 | -2.602063 |
| C      | -3.679904 | 0.455979  | -0.632815 |
| F      | -2.886486 | -1.110118 | -3.783744 |
| F      | -4.743358 | 0.810468  | 0.080988  |
| C      | -3.841111 | -0.150797 | -1.866130 |
| F      | 0.403920  | 6.234567  | 1.102121  |
| F      | -5.058579 | -0.405449 | -2.326745 |
| F      | 4.904655  | -1.943578 | -2.232696 |
| H      | -0.236362 | -0.425755 | 1.045158  |
| Si     | 0.047245  | -3.009558 | 2.315492  |
| H      | 0.350785  | 0.140865  | 1.095506  |
| H      | -0.282624 | -4.110394 | 1.395843  |
| C      | 1.825537  | -2.504777 | 2.002682  |
| C      | 2.661762  | -3.483513 | 1.446786  |
| C      | 2.380201  | -1.245408 | 2.272296  |

|   |           |           |           |
|---|-----------|-----------|-----------|
| C | 3.998895  | -3.217972 | 1.166760  |
| H | 2.263540  | -4.465287 | 1.209678  |
| C | 3.709327  | -0.966931 | 1.968425  |
| H | 1.785489  | -0.455024 | 2.718380  |
| C | 4.521725  | -1.953795 | 1.417016  |
| H | 4.622725  | -3.989250 | 0.730713  |
| H | 4.111106  | 0.019679  | 2.167733  |
| H | 5.556595  | -1.735691 | 1.179465  |
| H | -0.146769 | -3.431711 | 3.722947  |
| C | -2.373442 | -1.971928 | 1.491566  |
| C | -3.572282 | -1.567025 | 2.084796  |
| C | -2.431178 | -2.680142 | 0.281351  |
| C | -4.793100 | -1.869670 | 1.483144  |
| H | -3.574587 | -1.006792 | 3.008873  |
| C | -3.651115 | -2.981831 | -0.303275 |
| H | -1.516116 | -2.975023 | -0.214360 |
| C | -4.845393 | -2.577684 | 0.291959  |
| H | -5.707775 | -1.535115 | 1.957644  |
| H | -3.666818 | -3.521422 | -1.243629 |
| H | -5.796109 | -2.803333 | -0.174305 |
| N | -1.096072 | -1.648669 | 2.058194  |
| C | -1.151361 | -0.807101 | 3.272576  |
| H | -0.136093 | -0.596325 | 3.611194  |
| H | -1.634903 | 0.144749  | 3.053328  |
| H | -1.680408 | -1.304351 | 4.090982  |

**N2-TS3**

| Symbol | X         | Y         | Z         |
|--------|-----------|-----------|-----------|
| Si     | -1.422792 | -0.299362 | -1.568570 |
| H      | 0.919451  | -0.206452 | -0.703483 |
| H      | -0.597545 | -1.077374 | -2.512107 |
| F      | 4.180112  | 4.439514  | -1.023638 |
| F      | 0.703411  | 0.159394  | 4.947871  |
| F      | 4.255323  | 1.811777  | -0.794154 |
| C      | 3.094167  | 3.794242  | -0.592057 |
| C      | 0.563834  | -1.890589 | 3.807858  |
| C      | 0.861866  | -0.543081 | 3.820703  |
| C      | 3.098464  | 2.409061  | -0.466340 |
| C      | 1.958874  | 4.510528  | -0.269584 |
| F      | 0.450371  | -3.913374 | 2.615800  |
| C      | 0.733021  | -2.607588 | 2.636119  |
| F      | 1.612138  | 1.379109  | 2.776041  |
| C      | 1.321489  | 0.070349  | 2.661950  |
| C      | 1.165357  | -1.949955 | 1.500711  |



C 1.471930 -0.593284 1.455688  
 C 2.004677 1.676467 -0.027659  
 C 0.844694 3.825555 0.185805  
 F 1.286028 -2.694432 0.388119  
 C 0.897690 2.450660 0.298752  
 B 1.864448 0.046282 0.010060  
 F -0.268071 4.501821 0.505085  
 F -0.211080 1.851137 0.769246  
 C 3.133047 -0.693572 -0.693182  
 F 4.217148 -1.344810 1.311400  
 F 2.276827 -0.104631 -2.817428  
 C 4.172783 -1.325077 -0.031502  
 C 3.215236 -0.723313 -2.077771  
 C 5.220217 -1.957928 -0.685235  
 C 4.240980 -1.339445 -2.773394  
 F 6.197479 -2.554912 0.002558  
 F 4.271466 -1.334056 -4.109453  
 C 5.253764 -1.966143 -2.067421  
 F 1.934230 5.837347 -0.389182  
 F 6.253041 -2.567006 -2.714872  
 F 0.094737 -2.494029 4.902256  
 H -0.961449 1.093059 -1.433955  
 C -1.736681 -1.207919 0.017428  
 C -1.779737 -2.607886 -0.003088  
 C -2.053850 -0.542919 1.208334  
 C -2.147217 -3.324473 1.130147  
 H -1.528407 -3.146351 -0.911791  
 C -2.421895 -1.258705 2.343335  
 H -2.012484 0.538276 1.257095  
 C -2.474440 -2.649225 2.302860  
 H -2.168534 -4.407036 1.102626  
 H -2.659219 -0.728623 3.259300  
 H -2.750259 -3.207988 3.190030  
 C -3.951127 -1.179126 -2.370368  
 C -4.194273 -2.017579 -3.456961  
 C -4.628762 -1.400483 -1.167794  
 C -5.109549 -3.061119 -3.337872  
 H -3.679406 -1.869134 -4.396933  
 C -5.538308 -2.442445 -1.057270  
 H -4.415899 -0.774088 -0.308755  
 C -5.784591 -3.277959 -2.143934  
 H -5.288993 -3.706403 -4.189203  
 H -6.049957 -2.604143 -0.116192  
 H -6.494112 -4.091334 -2.057561

N -3.023903 -0.071495 -2.440488  
 C -2.762364 0.424596 -3.812381  
 H -2.199074 1.358244 -3.743499  
 H -2.173474 -0.280284 -4.403007  
 H -3.706060 0.616284 -4.327246  
 H -3.693626 1.047672 -1.865217  
 C -4.132989 2.156182 -0.041745  
 C -5.005308 1.545983 0.852221  
 C -3.041085 2.888796 0.409222  
 C -4.766626 1.671022 2.217146  
 H -5.862490 0.982739 0.505650  
 C -2.819586 3.017054 1.775264  
 H -2.360990 3.355205 -0.295712  
 C -3.679308 2.404597 2.680855  
 H -5.439801 1.193098 2.917730  
 H -1.963639 3.582694 2.119463  
 H -3.503194 2.499443 3.744978  
 N -4.303592 2.005431 -1.482932  
 C -5.699589 1.897196 -1.982161  
 H -5.670688 1.934483 -3.069300  
 H -6.118393 0.942361 -1.673906  
 H -6.299431 2.718553 -1.593383  
 H -3.860299 2.808700 -1.928930

**N2-TS4**

| Symbol | X         | Y         | Z         |
|--------|-----------|-----------|-----------|
| F      | 3.247385  | -3.101206 | 2.429892  |
| F      | 4.771153  | 2.866890  | 0.313368  |
| F      | 1.922164  | -0.789979 | 2.008160  |
| C      | 2.737246  | -2.831741 | 1.231687  |
| C      | 2.765045  | 3.946085  | -0.247148 |
| C      | 3.475341  | 2.792337  | 0.023973  |
| C      | 2.051513  | -1.655970 | 0.995806  |
| C      | 2.892733  | -3.739800 | 0.195008  |
| F      | 0.722223  | 4.963643  | -0.820735 |
| C      | 1.415862  | 3.861252  | -0.553370 |
| F      | 3.599499  | 0.498610  | 0.247910  |
| C      | 2.833891  | 1.561222  | -0.014114 |
| C      | 0.817781  | 2.617962  | -0.575239 |
| C      | 1.482432  | 1.428123  | -0.303871 |
| C      | 1.513085  | -1.329049 | -0.240746 |
| C      | 2.363826  | -3.457742 | -1.051296 |
| F      | -0.492980 | 2.575415  | -0.874558 |
| C      | 1.686628  | -2.263492 | -1.245685 |

|   |           |           |           |
|---|-----------|-----------|-----------|
| B | 0.668365  | 0.041482  | -0.346753 |
| F | 2.505061  | -4.329477 | -2.046402 |
| F | 1.179990  | -2.040336 | -2.469098 |
| C | -0.679430 | -0.085966 | 0.521673  |
| F | -0.300039 | 1.812388  | 1.889786  |
| F | -1.273396 | -1.970387 | -0.755663 |
| C | -1.048111 | 0.753673  | 1.562665  |
| C | -1.530879 | -1.156484 | 0.280539  |
| C | -2.200710 | 0.554316  | 2.305987  |
| C | -2.676697 | -1.402961 | 1.012048  |
| F | -2.539726 | 1.403885  | 3.273239  |
| F | -3.458846 | -2.440509 | 0.732838  |
| C | -3.017637 | -0.526862 | 2.027862  |
| F | 3.546899  | -4.876634 | 0.400280  |
| F | -4.139924 | -0.706720 | 2.711960  |
| F | 3.369027  | 5.126214  | -0.219630 |
| H | -0.293743 | 0.198095  | -1.655879 |
| H | 0.462844  | -0.110211 | -1.725065 |
| C | -3.092382 | 0.413730  | -1.733322 |
| C | -3.939704 | -0.684604 | -1.879210 |
| C | -3.437694 | 1.434455  | -0.839556 |
| C | -5.109114 | -0.763435 | -1.125094 |
| H | -3.691311 | -1.487366 | -2.560725 |
| C | -4.605431 | 1.346016  | -0.097557 |
| H | -2.774676 | 2.284426  | -0.719958 |
| C | -5.446808 | 0.241068  | -0.228655 |
| H | -5.751467 | -1.628309 | -1.238975 |
| H | -4.853310 | 2.138562  | 0.599431  |
| H | -6.350947 | 0.168748  | 0.362367  |
| N | -1.855050 | 0.503594  | -2.426961 |
| C | -1.672123 | -0.370266 | -3.590038 |
| H | -0.769183 | -0.060153 | -4.115156 |
| H | -1.534095 | -1.398682 | -3.252846 |
| H | -2.518200 | -0.327844 | -4.281385 |
| H | -1.680754 | 1.472802  | -2.675511 |

## N2-TS5

| Symbol | X         | Y         | Z         |
|--------|-----------|-----------|-----------|
| Si     | -1.289771 | -0.753294 | -1.712479 |
| H      | 0.242523  | -0.148994 | -0.641496 |
| H      | -0.787316 | -2.109847 | -1.443691 |
| F      | 5.705625  | 1.927449  | -0.960662 |
| F      | -0.298329 | 3.701738  | 3.280477  |
| F      | 4.147654  | 0.227984  | 0.370653  |

|   |           |           |           |
|---|-----------|-----------|-----------|
| C | 4.384051  | 1.972237  | -1.134836 |
| C | -1.217228 | 1.558796  | 3.562983  |
| C | -0.346598 | 2.416575  | 2.921273  |
| C | 3.548452  | 1.090189  | -0.464679 |
| C | 3.837178  | 2.912222  | -1.988388 |
| F | -2.101863 | -0.607901 | 3.791551  |
| C | -1.259019 | 0.228266  | 3.182392  |
| F | 1.265448  | 2.848461  | 1.325056  |
| C | 0.460317  | 1.938311  | 1.896577  |
| C | -0.445059 | -0.202208 | 2.153427  |
| C | 0.439332  | 0.620359  | 1.463847  |
| C | 2.169183  | 1.090226  | -0.609680 |
| C | 2.462982  | 2.964038  | -2.150462 |
| F | -0.558843 | -1.493540 | 1.798903  |
| C | 1.669964  | 2.065461  | -1.460193 |
| B | 1.185444  | 0.041742  | 0.145875  |
| F | 1.924558  | 3.879558  | -2.958337 |
| F | 0.339933  | 2.195120  | -1.621354 |
| C | 1.882234  | -1.417399 | 0.283041  |
| F | 2.150974  | -1.387621 | 2.634392  |
| F | 1.768208  | -1.649822 | -2.066895 |
| C | 2.297640  | -2.018688 | 1.460781  |
| C | 2.116343  | -2.155408 | -0.868162 |
| C | 2.885990  | -3.272527 | 1.505588  |
| C | 2.698477  | -3.412111 | -0.872150 |
| F | 3.266019  | -3.809188 | 2.666492  |
| F | 2.889419  | -4.079252 | -2.012050 |
| C | 3.087753  | -3.974918 | 0.330137  |
| F | 4.622307  | 3.767233  | -2.640354 |
| F | 3.652181  | -5.181033 | 0.356629  |
| F | -2.022155 | 2.005229  | 4.526223  |
| H | -0.562389 | 0.099522  | -2.659356 |
| C | -2.374949 | 0.002967  | -0.406878 |
| C | -3.110673 | -0.816442 | 0.458249  |
| C | -2.482785 | 1.392456  | -0.268972 |
| C | -3.947070 | -0.264344 | 1.423818  |
| H | -3.023454 | -1.895604 | 0.391374  |
| C | -3.309094 | 1.945893  | 0.703348  |
| H | -1.908009 | 2.047604  | -0.914457 |
| C | -4.047312 | 1.117964  | 1.546052  |
| H | -4.497854 | -0.911655 | 2.095843  |
| H | -3.371796 | 3.022677  | 0.808675  |
| H | -4.684322 | 1.550332  | 2.309075  |
| C | -5.221125 | -0.509893 | -2.113828 |

|   |           |           |           |
|---|-----------|-----------|-----------|
| C | -4.484862 | 0.367160  | -2.966228 |
| C | -4.791287 | -1.862173 | -1.979756 |
| C | -3.313507 | -0.046173 | -3.522352 |
| H | -4.861305 | 1.368395  | -3.139145 |
| C | -3.607551 | -2.254593 | -2.536985 |
| H | -5.387362 | -2.565283 | -1.414331 |
| C | -2.761001 | -1.332896 | -3.221122 |
| H | -2.751124 | 0.631903  | -4.154495 |
| H | -3.275216 | -3.279782 | -2.415465 |
| H | -2.007929 | -1.736967 | -3.893711 |
| N | -6.295798 | -0.056966 | -1.467821 |
| C | -7.093003 | -0.847641 | -0.545765 |
| H | -7.849799 | -0.202638 | -0.107438 |
| H | -7.590031 | -1.672336 | -1.061391 |
| H | -6.464856 | -1.247069 | 0.254269  |
| H | -6.546461 | 0.911933  | -1.597143 |

#### N2-TS6

| Symbol | X         | Y         | Z         |
|--------|-----------|-----------|-----------|
| Si     | 1.655499  | 0.385962  | 1.242302  |
| H      | -0.872918 | 0.116840  | 0.820800  |
| H      | 1.350330  | -0.580529 | 0.165817  |
| F      | -6.552365 | -1.476065 | 0.351585  |
| F      | -3.776628 | 4.539980  | -0.961516 |
| F      | -4.382354 | -0.728701 | -1.048129 |
| C      | -5.427664 | -1.138271 | 0.987317  |
| C      | -1.702490 | 4.001376  | -1.923180 |
| C      | -2.799732 | 3.650005  | -1.164447 |
| C      | -4.294086 | -0.759308 | 0.291456  |
| C      | -5.389489 | -1.162281 | 2.372371  |
| F      | 0.382171  | 3.408267  | -2.838221 |
| C      | -0.691853 | 3.074840  | -2.116971 |
| F      | -3.965354 | 2.141879  | 0.141981  |
| C      | -2.868460 | 2.382208  | -0.598969 |
| C      | -0.803147 | 1.828414  | -1.534119 |
| C      | -1.877091 | 1.425586  | -0.747088 |
| C      | -3.103993 | -0.392646 | 0.902363  |
| C      | -4.226539 | -0.803317 | 3.027707  |
| F      | 0.222509  | 0.981419  | -1.739207 |
| C      | -3.113909 | -0.428269 | 2.286665  |
| B      | -1.782975 | 0.000492  | 0.036996  |
| F      | -4.187836 | -0.822717 | 4.363364  |
| F      | -2.023401 | -0.084300 | 2.994149  |
| C      | -1.414643 | -1.269357 | -0.925535 |

|   |           |           |           |
|---|-----------|-----------|-----------|
| F | -2.153458 | -0.320944 | -2.969247 |
| F | -0.618272 | -2.451320 | 0.969568  |
| C | -1.621486 | -1.350088 | -2.295498 |
| C | -0.870362 | -2.412016 | -0.354129 |
| C | -1.296014 | -2.464318 | -3.055972 |
| C | -0.560475 | -3.557058 | -1.068667 |
| F | -1.499221 | -2.476869 | -4.374999 |
| F | -0.054335 | -4.639276 | -0.462247 |
| C | -0.759850 | -3.577857 | -2.436888 |
| F | -6.468034 | -1.525655 | 3.066834  |
| F | -0.429967 | -4.658925 | -3.144769 |
| F | -1.598360 | 5.226998  | -2.440367 |
| H | 1.080380  | -0.036574 | 2.538064  |
| C | 1.211188  | 2.175022  | 0.918363  |
| C | 2.008101  | 2.976781  | 0.092465  |
| C | 0.073024  | 2.743623  | 1.504625  |
| C | 1.671657  | 4.304371  | -0.153997 |
| H | 2.898465  | 2.563374  | -0.372669 |
| C | -0.264629 | 4.070999  | 1.261779  |
| H | -0.567751 | 2.135973  | 2.136843  |
| C | 0.533312  | 4.851967  | 0.429954  |
| H | 2.290558  | 4.907654  | -0.807447 |
| H | -1.155489 | 4.493044  | 1.712842  |
| H | 0.263233  | 5.882794  | 0.230339  |
| C | 6.042819  | 1.638889  | 0.979933  |
| C | 5.370198  | 1.714265  | 2.237300  |
| C | 5.458946  | 0.875321  | -0.065271 |
| C | 4.184875  | 1.070663  | 2.422482  |
| H | 5.817078  | 2.298402  | 3.033966  |
| C | 4.262714  | 0.239077  | 0.143547  |
| H | 5.951115  | 0.803773  | -1.025720 |
| C | 3.564196  | 0.281406  | 1.394064  |
| H | 3.691922  | 1.150050  | 3.387416  |
| H | 3.826891  | -0.327291 | -0.675544 |
| H | 3.509856  | -0.971569 | 1.819301  |
| N | 7.202572  | 2.282038  | 0.811684  |
| C | 7.964052  | 2.295318  | -0.425138 |
| H | 8.853665  | 2.900670  | -0.273014 |
| H | 8.271638  | 1.285182  | -0.705140 |
| H | 7.380020  | 2.728919  | -1.240287 |
| C | 3.766945  | -2.952792 | 0.829516  |
| C | 2.704330  | -3.470377 | 0.094743  |
| C | 5.046837  | -2.901043 | 0.276800  |
| C | 2.929901  | -3.938340 | -1.196731 |

|   |          |           |           |
|---|----------|-----------|-----------|
| H | 1.711294 | -3.523041 | 0.520522  |
| C | 5.260196 | -3.370880 | -1.012195 |
| H | 5.868115 | -2.487046 | 0.853079  |
| C | 4.201732 | -3.886973 | -1.755264 |
| H | 2.103068 | -4.352951 | -1.761387 |
| H | 6.256161 | -3.332690 | -1.436084 |
| H | 4.369327 | -4.252621 | -2.760395 |
| N | 3.558943 | -2.356519 | 2.116385  |
| C | 2.374815 | -2.776629 | 2.887287  |
| H | 2.409133 | -2.282437 | 3.856215  |
| H | 1.467934 | -2.465302 | 2.371837  |
| H | 2.360519 | -3.859630 | 3.022538  |
| H | 7.555412 | 2.821287  | 1.587392  |
| H | 4.397944 | -2.454623 | 2.683939  |

### N2-TS7

| Symbol | X         | Y         | Z         |
|--------|-----------|-----------|-----------|
| F      | 3.247385  | -3.101206 | 2.429892  |
| F      | 4.771153  | 2.866890  | 0.313368  |
| F      | 1.922164  | -0.789979 | 2.008160  |
| C      | 2.737246  | -2.831741 | 1.231687  |
| C      | 2.765045  | 3.946085  | -0.247148 |
| C      | 3.475341  | 2.792337  | 0.023973  |
| C      | 2.051513  | -1.655970 | 0.995806  |
| C      | 2.892733  | -3.739800 | 0.195008  |
| F      | 0.722223  | 4.963643  | -0.820735 |
| C      | 1.415862  | 3.861252  | -0.553370 |
| F      | 3.599499  | 0.498610  | 0.247910  |
| C      | 2.833891  | 1.561222  | -0.014114 |
| C      | 0.817781  | 2.617962  | -0.575239 |
| C      | 1.482432  | 1.428123  | -0.303871 |
| C      | 1.513085  | -1.329049 | -0.240746 |
| C      | 2.363826  | -3.457742 | -1.051296 |
| F      | -0.492980 | 2.575415  | -0.874558 |
| C      | 1.686628  | -2.263492 | -1.245685 |
| B      | 0.668365  | 0.041482  | -0.346753 |
| F      | 2.505061  | -4.329477 | -2.046402 |
| F      | 1.179990  | -2.040336 | -2.469098 |
| C      | -0.679430 | -0.085966 | 0.521673  |
| F      | -0.300039 | 1.812388  | 1.889786  |
| F      | -1.273396 | -1.970387 | -0.755663 |
| C      | -1.048111 | 0.753673  | 1.562665  |
| C      | -1.530879 | -1.156484 | 0.280539  |
| C      | -2.200710 | 0.554316  | 2.305987  |

|   |           |           |           |
|---|-----------|-----------|-----------|
| C | -2.676697 | -1.402961 | 1.012048  |
| F | -2.539726 | 1.403885  | 3.273239  |
| F | -3.458846 | -2.440509 | 0.732838  |
| C | -3.017637 | -0.526862 | 2.027862  |
| F | 3.546899  | -4.876634 | 0.400280  |
| F | -4.139924 | -0.706720 | 2.711960  |
| F | 3.369027  | 5.126214  | -0.219630 |
| H | -0.293743 | 0.198095  | -1.655879 |
| H | 0.462844  | -0.110211 | -1.725065 |
| C | -3.092382 | 0.413730  | -1.733322 |
| C | -3.939704 | -0.684604 | -1.879210 |
| C | -3.437694 | 1.434455  | -0.839556 |
| C | -5.109114 | -0.763435 | -1.125094 |
| H | -3.691311 | -1.487366 | -2.560725 |
| C | -4.605431 | 1.346016  | -0.097557 |
| H | -2.774676 | 2.284426  | -0.719958 |
| C | -5.446808 | 0.241068  | -0.228655 |
| H | -5.751467 | -1.628309 | -1.238975 |
| H | -4.853310 | 2.138562  | 0.599431  |
| H | -6.350947 | 0.168748  | 0.362367  |
| N | -1.855050 | 0.503594  | -2.426961 |
| C | -1.672123 | -0.370266 | -3.590038 |
| H | -0.769183 | -0.060153 | -4.115156 |
| H | -1.534095 | -1.398682 | -3.252846 |
| H | -2.518200 | -0.327844 | -4.281385 |
| H | -1.680754 | 1.472802  | -2.675511 |

### Ph<sub>2</sub>NH-add

| Symbol | X         | Y         | Z         |
|--------|-----------|-----------|-----------|
| B      | -0.103942 | -0.023401 | 0.075175  |
| C      | 1.135002  | -0.408729 | -0.929369 |
| C      | 2.308519  | 0.348045  | -0.942326 |
| C      | 3.417517  | 0.047306  | -1.711672 |
| C      | 3.383389  | -1.043212 | -2.561366 |
| C      | 2.232565  | -1.803191 | -2.625266 |
| C      | 1.146880  | -1.469387 | -1.829542 |
| C      | -0.408306 | 1.599733  | 0.120501  |
| C      | -1.181581 | 2.163587  | 1.129358  |
| C      | -1.578789 | 3.486615  | 1.179243  |
| C      | -1.229777 | 4.327382  | 0.138586  |
| C      | -0.498833 | 3.816224  | -0.916543 |
| C      | -0.112638 | 2.483290  | -0.915805 |
| C      | -1.574036 | -0.646940 | -0.300271 |
| C      | -2.024246 | -0.512977 | -1.611356 |

|   |           |           |           |
|---|-----------|-----------|-----------|
| C | -3.280480 | -0.897605 | -2.039453 |
| C | -4.177095 | -1.421697 | -1.123174 |
| C | -3.797829 | -1.535892 | 0.199443  |
| C | -2.525413 | -1.137654 | 0.584525  |
| F | 2.416820  | 1.456169  | -0.198975 |
| F | 4.511690  | 0.803039  | -1.644122 |
| F | 4.435708  | -1.347759 | -3.310605 |
| F | 2.168533  | -2.845678 | -3.450803 |
| F | 0.074373  | -2.264385 | -1.984671 |
| F | -1.596665 | 1.394218  | 2.163046  |
| F | -2.293560 | 3.946471  | 2.202427  |
| F | -1.599827 | 5.601930  | 0.149114  |
| F | -0.171777 | 4.607929  | -1.934836 |
| F | 0.563885  | 2.093639  | -2.000976 |
| F | -2.265383 | -1.243046 | 1.900426  |
| F | -4.655952 | -2.012985 | 1.098386  |
| F | -5.391724 | -1.794276 | -1.510378 |
| F | -3.640191 | -0.757773 | -3.313142 |
| F | -1.217734 | 0.030903  | -2.532537 |
| N | 0.339309  | -0.527464 | 1.622719  |
| H | -0.389761 | -0.120320 | 2.213521  |
| C | 1.611903  | 0.071171  | 2.075155  |
| C | 1.587157  | 1.283921  | 2.746894  |
| C | 2.807963  | -0.583562 | 1.807773  |
| C | 2.790242  | 1.875235  | 3.119239  |
| H | 0.646262  | 1.762337  | 2.991218  |
| C | 4.002741  | 0.021118  | 2.174800  |
| H | 2.805736  | -1.548194 | 1.313999  |
| C | 3.996774  | 1.253594  | 2.822134  |
| H | 2.777332  | 2.822294  | 3.643683  |
| H | 4.939709  | -0.475555 | 1.955956  |
| H | 4.931345  | 1.720283  | 3.107149  |
| C | 0.316976  | -1.972583 | 1.977282  |
| C | 0.431395  | -2.274612 | 3.332034  |
| C | 0.179914  | -2.974463 | 1.035876  |
| C | 0.412606  | -3.597968 | 3.743465  |
| H | 0.540077  | -1.476413 | 4.058151  |
| C | 0.168838  | -4.304385 | 1.458694  |
| H | 0.050822  | -2.752968 | -0.009197 |
| C | 0.286377  | -4.619571 | 2.803946  |
| H | 0.496828  | -3.830929 | 4.797496  |
| H | 0.060749  | -5.089655 | 0.721004  |
| H | 0.275276  | -5.653927 | 3.124121  |

### Ph<sub>2</sub>NH

| Symbol | X         | Y         | Z         |
|--------|-----------|-----------|-----------|
| C      | 0.672438  | 0.135914  | 0.390087  |
| C      | -0.146940 | 1.256551  | 0.203017  |
| C      | 0.187200  | -1.124472 | 0.015399  |
| C      | -1.406632 | 1.111647  | -0.366041 |
| H      | 0.192489  | 2.233623  | 0.521677  |
| C      | -1.079446 | -1.257935 | -0.535219 |
| H      | 0.816392  | -1.996174 | 0.158589  |
| C      | -1.884047 | -0.140295 | -0.740858 |
| H      | -2.025685 | 1.990693  | -0.502897 |
| H      | -1.434643 | -2.242897 | -0.814812 |
| H      | -2.867844 | -0.244538 | -1.180694 |
| N      | 1.931889  | 0.216610  | 0.984841  |
| H      | 2.256478  | -0.621157 | 1.443427  |
| C      | 2.797458  | 1.309023  | 1.029412  |
| C      | 2.787599  | 2.321005  | 0.060207  |
| C      | 3.751341  | 1.367754  | 2.054742  |
| C      | 3.696313  | 3.369390  | 0.137845  |
| H      | 2.085551  | 2.274863  | -0.762218 |
| C      | 4.664637  | 2.410950  | 2.110847  |
| H      | 3.765157  | 0.587366  | 2.807849  |
| C      | 4.639421  | 3.427024  | 1.159383  |
| H      | 3.672476  | 4.142446  | -0.621464 |
| H      | 5.394451  | 2.433391  | 2.911726  |
| H      | 5.345560  | 4.246095  | 1.210473  |

### Ph<sub>2</sub>NH-product

| Symbol | X         | Y         | Z         |
|--------|-----------|-----------|-----------|
| Si     | -0.459579 | -0.328055 | 0.575539  |
| C      | -0.163418 | 1.494082  | 0.248991  |
| C      | -0.527705 | 2.465064  | 1.189385  |
| C      | 0.380155  | 1.921127  | -0.969528 |
| C      | -0.359099 | 3.820930  | 0.921553  |
| H      | -0.947193 | 2.165734  | 2.145253  |
| C      | 0.549902  | 3.274465  | -1.242320 |
| H      | 0.684149  | 1.183832  | -1.707467 |
| C      | 0.179266  | 4.226120  | -0.295724 |
| H      | -0.645517 | 4.559247  | 1.661367  |
| H      | 0.974704  | 3.587672  | -2.188863 |
| H      | 0.313004  | 5.280891  | -0.505627 |
| C      | 2.098926  | -1.073344 | -0.358827 |
| C      | 2.940154  | -1.775987 | -1.237683 |
| C      | 2.695822  | -0.162320 | 0.529574  |

|   |           |           |           |
|---|-----------|-----------|-----------|
| C | 4.314570  | -1.572863 | -1.222048 |
| H | 2.513930  | -2.482474 | -1.937978 |
| C | 4.070348  | 0.035072  | 0.530812  |
| H | 2.090163  | 0.406243  | 1.223663  |
| C | 4.895933  | -0.667461 | -0.341128 |
| H | 4.934474  | -2.131646 | -1.913963 |
| H | 4.496653  | 0.745850  | 1.229371  |
| H | 5.967515  | -0.513061 | -0.332709 |
| N | 0.704551  | -1.259686 | -0.384718 |
| C | -0.333295 | -0.735892 | 2.398195  |
| H | -1.126547 | -0.235435 | 2.959393  |
| H | -0.452179 | -1.812905 | 2.544942  |
| H | 0.627684  | -0.445096 | 2.826477  |
| C | -2.163483 | -0.805857 | -0.050542 |
| C | -2.752460 | -2.022001 | 0.323166  |
| C | -2.858324 | 0.017774  | -0.943374 |
| C | -3.981657 | -2.412756 | -0.194904 |
| H | -2.238628 | -2.686042 | 1.011867  |
| C | -4.091772 | -0.367306 | -1.463255 |
| H | -2.429695 | 0.969253  | -1.243409 |
| C | -4.651604 | -1.585380 | -1.093424 |
| H | -4.416965 | -3.360952 | 0.098346  |
| H | -4.613810 | 0.282068  | -2.156401 |
| H | -5.608912 | -1.889351 | -1.500603 |
| C | 0.205824  | -2.407183 | -1.086878 |
| C | 0.316504  | -3.674320 | -0.515971 |
| C | -0.429581 | -2.257142 | -2.317068 |
| C | -0.220384 | -4.781210 | -1.164383 |
| H | 0.818731  | -3.777834 | 0.440116  |
| C | -0.974258 | -3.363561 | -2.960567 |
| H | -0.511946 | -1.265479 | -2.747975 |
| C | -0.872778 | -4.626805 | -2.384846 |
| H | -0.137753 | -5.762572 | -0.712458 |
| H | -1.480176 | -3.238063 | -3.910451 |
| H | -1.299639 | -5.487727 | -2.885055 |

#### Ph<sub>2</sub>NH-TS4

| Symbol | X         | Y         | Z         |
|--------|-----------|-----------|-----------|
| F      | -4.097989 | -3.074926 | -1.844724 |
| F      | -4.820059 | 2.977724  | 0.367922  |
| F      | -2.586564 | -0.839540 | -1.920420 |
| C      | -3.303249 | -2.769708 | -0.822925 |
| C      | -2.757788 | 4.016679  | -0.046137 |
| C      | -3.508888 | 2.877378  | 0.170574  |

|   |           |           |           |
|---|-----------|-----------|-----------|
| C | -2.516990 | -1.634412 | -0.844353 |
| C | -3.258016 | -3.597859 | 0.288636  |
| F | -0.655455 | 4.990666  | -0.450738 |
| C | -1.391970 | 3.902937  | -0.246072 |
| F | -3.692415 | 0.592380  | 0.413966  |
| C | -2.889583 | 1.635526  | 0.186541  |
| C | -0.816654 | 2.647889  | -0.227094 |
| C | -1.524113 | 1.468973  | -0.018857 |
| C | -1.681963 | -1.271361 | 0.202854  |
| C | -2.434891 | -3.276213 | 1.352123  |
| F | 0.512250  | 2.596610  | -0.423850 |
| C | -1.665830 | -2.123913 | 1.291133  |
| B | -0.774299 | 0.045182  | -0.008407 |
| F | -2.386136 | -4.069665 | 2.418877  |
| F | -0.880237 | -1.856948 | 2.346066  |
| C | 0.343097  | -0.266181 | -1.127722 |
| F | -0.374856 | 1.364445  | -2.688365 |
| F | 1.192615  | -1.961959 | 0.265794  |
| C | 0.449055  | 0.365548  | -2.357839 |
| C | 1.224927  | -1.318478 | -0.912873 |
| C | 1.398991  | 0.002324  | -3.300291 |
| C | 2.172693  | -1.724202 | -1.832021 |
| F | 1.489808  | 0.654931  | -4.456890 |
| F | 2.995091  | -2.735217 | -1.572892 |
| C | 2.265182  | -1.042959 | -3.033576 |
| F | -4.003320 | -4.695882 | 0.330104  |
| F | 3.196460  | -1.378212 | -3.917135 |
| F | -3.337117 | 5.208907  | -0.058588 |
| H | 0.446104  | 0.288746  | 1.005687  |
| H | -0.255799 | -0.000469 | 1.308502  |
| C | 3.171335  | 0.555898  | 0.518724  |
| C | 3.957360  | -0.562585 | 0.791800  |
| C | 3.397789  | 1.289963  | -0.649065 |
| C | 4.946833  | -0.946306 | -0.108758 |
| H | 3.800813  | -1.136184 | 1.695571  |
| C | 4.386237  | 0.895270  | -1.540366 |
| H | 2.791860  | 2.163522  | -0.861100 |
| C | 5.163093  | -0.231113 | -1.280742 |
| H | 5.544841  | -1.822741 | 0.109896  |
| H | 4.542932  | 1.469018  | -2.446683 |
| H | 5.926244  | -0.544154 | -1.981929 |
| N | 2.089092  | 0.952641  | 1.368240  |
| H | 1.888705  | 1.936171  | 1.210927  |
| C | 2.177262  | 0.687185  | 2.778785  |

|   |          |           |          |
|---|----------|-----------|----------|
| C | 1.844486 | -0.576455 | 3.262688 |
| C | 2.541900 | 1.700378  | 3.662602 |
| C | 1.892854 | -0.826722 | 4.630095 |
| H | 1.542285 | -1.354789 | 2.571893 |
| C | 2.574319 | 1.447602  | 5.029326 |
| H | 2.799973 | 2.681065  | 3.277823 |
| C | 2.255360 | 0.183202  | 5.515504 |
| H | 1.634926 | -1.810917 | 5.001624 |
| H | 2.854480 | 2.239206  | 5.713571 |
| H | 2.284766 | -0.012401 | 6.580276 |

**PhNH<sub>2</sub>-add**

| Symbol | X         | Y         | Z         |
|--------|-----------|-----------|-----------|
| B      | -0.123292 | -0.039794 | 0.386252  |
| C      | 1.138745  | -0.930677 | -0.135552 |
| C      | 2.320774  | -0.341711 | -0.579361 |
| C      | 3.443579  | -1.059330 | -0.948541 |
| C      | 3.418308  | -2.441739 | -0.881189 |
| C      | 2.274001  | -3.076172 | -0.438054 |
| C      | 1.170625  | -2.318819 | -0.070887 |
| C      | -0.431491 | 1.323611  | -0.465350 |
| C      | -1.232560 | 2.318288  | 0.081968  |
| C      | -1.627174 | 3.464105  | -0.583584 |
| C      | -1.238265 | 3.636292  | -1.899795 |
| C      | -0.472748 | 2.659825  | -2.509852 |
| C      | -0.092414 | 1.531155  | -1.798684 |
| C      | -1.543962 | -0.851904 | 0.418966  |
| C      | -2.016222 | -1.370573 | -0.782050 |
| C      | -3.223548 | -2.029548 | -0.911815 |
| C      | -4.032252 | -2.185614 | 0.202882  |
| C      | -3.613946 | -1.679902 | 1.417979  |
| C      | -2.391502 | -1.028856 | 1.499304  |
| F      | 2.431133  | 0.990792  | -0.642971 |
| F      | 4.549232  | -0.435773 | -1.350431 |
| F      | 4.486526  | -3.149438 | -1.228848 |
| F      | 2.240929  | -4.405027 | -0.357478 |
| F      | 0.117698  | -3.014702 | 0.381077  |
| F      | -1.674364 | 2.192855  | 1.354708  |
| F      | -2.373297 | 4.384809  | 0.021044  |
| F      | -1.603507 | 4.721795  | -2.571415 |
| F      | -0.109904 | 2.808366  | -3.781715 |
| F      | 0.619403  | 0.632811  | -2.485099 |
| F      | -2.055001 | -0.565675 | 2.722015  |
| F      | -4.380820 | -1.818828 | 2.496967  |

|   |           |           |           |
|---|-----------|-----------|-----------|
| F | -5.198081 | -2.814067 | 0.101733  |
| F | -3.617276 | -2.512299 | -2.087676 |
| F | -1.268239 | -1.246419 | -1.886696 |
| N | 0.278666  | 0.359812  | 1.937663  |
| H | -0.480412 | 0.898924  | 2.356163  |
| C | 1.538156  | 1.077936  | 2.120689  |
| C | 1.551353  | 2.462009  | 2.022549  |
| C | 2.701412  | 0.356246  | 2.348682  |
| C | 2.764134  | 3.132355  | 2.130044  |
| H | 0.630332  | 3.012886  | 1.874883  |
| C | 3.909576  | 1.036447  | 2.448731  |
| H | 2.667271  | -0.724190 | 2.437877  |
| C | 3.943031  | 2.422031  | 2.331169  |
| H | 2.783841  | 4.212200  | 2.055325  |
| H | 4.822706  | 0.480300  | 2.619440  |
| H | 4.885948  | 2.948772  | 2.407024  |
| H | 0.313196  | -0.508907 | 2.474822  |

**PhNH<sub>2</sub>**

| Symbol | X         | Y         | Z         |
|--------|-----------|-----------|-----------|
| C      | 0.437802  | -0.298880 | -0.074158 |
| C      | 0.016194  | 1.037632  | -0.068264 |
| C      | -0.532622 | -1.307687 | -0.019867 |
| C      | -1.335558 | 1.349567  | -0.009542 |
| H      | 0.758103  | 1.827974  | -0.111845 |
| C      | -1.882219 | -0.984350 | 0.038440  |
| H      | -0.219728 | -2.346452 | -0.025328 |
| C      | -2.297713 | 0.344247  | 0.043876  |
| H      | -1.638292 | 2.390470  | -0.004076 |
| H      | -2.615227 | -1.781858 | 0.081726  |
| H      | -3.350674 | 0.591770  | 0.090312  |
| N      | 1.788947  | -0.616997 | -0.195603 |
| H      | 2.039582  | -1.525560 | 0.168277  |
| H      | 2.420268  | 0.097613  | 0.138155  |

**PhNH<sub>2</sub>-product**

| Symbol | X        | Y         | Z         |
|--------|----------|-----------|-----------|
| Si     | 0.648600 | 1.569617  | 0.950323  |
| C      | 1.884405 | 0.395064  | 0.165760  |
| C      | 3.137507 | 0.171223  | 0.751733  |
| C      | 1.596137 | -0.247374 | -1.044701 |
| C      | 4.073869 | -0.662052 | 0.147636  |
| H      | 3.393174 | 0.654782  | 1.690229  |
| C      | 2.527682 | -1.085039 | -1.651559 |

|                            |           |           |           |   |           |           |           |
|----------------------------|-----------|-----------|-----------|---|-----------|-----------|-----------|
| H                          | 0.628139  | -0.094071 | -1.512636 | F | 0.045617  | 5.117447  | -0.197527 |
| C                          | 3.768199  | -1.291913 | -1.055768 | C | 0.779288  | 4.084692  | 0.205955  |
| H                          | 5.038871  | -0.821792 | 0.614276  | F | 3.051270  | 0.936482  | 1.495627  |
| H                          | 2.286084  | -1.576944 | -2.586565 | C | 2.284810  | 1.930849  | 1.037319  |
| H                          | 4.494899  | -1.943585 | -1.526697 | C | 0.419218  | 2.788451  | -0.103707 |
| C                          | -1.772493 | 0.258670  | 0.250169  | C | 1.147559  | 1.672172  | 0.284813  |
| C                          | -3.087755 | 0.359547  | -0.228945 | C | 1.802055  | -0.927832 | -0.180957 |
| C                          | -1.345642 | -0.976920 | 0.761184  | C | 3.908463  | -1.718185 | -1.127599 |
| C                          | -3.942738 | -0.732647 | -0.192222 | F | -0.706276 | 2.615428  | -0.817307 |
| H                          | -3.432063 | 1.307515  | -0.629002 | C | 2.870429  | -0.808256 | -1.059277 |
| C                          | -2.213174 | -2.062253 | 0.798541  | B | 0.658046  | 0.200117  | -0.127532 |
| H                          | -0.327876 | -1.096974 | 1.115196  | F | 4.903769  | -1.560829 | -1.995203 |
| C                          | -3.516674 | -1.953715 | 0.325048  | F | 2.913667  | 0.242372  | -1.894550 |
| H                          | -4.953291 | -0.625831 | -0.569754 | C | -0.779867 | -0.280628 | 0.389677  |
| H                          | -1.858400 | -3.005264 | 1.198420  | F | -1.044486 | 1.446881  | 1.997835  |
| H                          | -4.186565 | -2.803698 | 0.354675  | F | -0.748998 | -2.051483 | -1.160680 |
| N                          | -0.921467 | 1.360622  | 0.205969  | C | -1.499985 | 0.339488  | 1.402283  |
| H                          | -1.321041 | 2.168426  | -0.252844 | C | -1.362084 | -1.421292 | -0.149384 |
| C                          | 0.570814  | 1.300413  | 2.800015  | C | -2.720280 | -0.141225 | 1.850116  |
| H                          | 1.560678  | 1.415625  | 3.248452  | C | -2.568580 | -1.938919 | 0.278583  |
| H                          | -0.094182 | 2.035074  | 3.260606  | F | -3.394696 | 0.502690  | 2.800595  |
| H                          | 0.199032  | 0.304220  | 3.048631  | F | -3.077667 | -3.035971 | -0.273383 |
| C                          | 1.126890  | 3.343043  | 0.566489  | C | -3.255368 | -1.284875 | 1.287015  |
| C                          | 0.435906  | 4.407017  | 1.164664  | F | 4.890136  | -3.689179 | -0.306429 |
| C                          | 2.168770  | 3.646359  | -0.318362 | F | -4.433667 | -1.737424 | 1.693910  |
| C                          | 0.770121  | 5.727700  | 0.884763  | F | 2.294926  | 5.532320  | 1.269291  |
| H                          | -0.375396 | 4.205787  | 1.858637  | H | -0.079804 | 0.353677  | -1.614098 |
| C                          | 2.508827  | 4.967000  | -0.599722 | H | 0.711364  | 0.434061  | -1.575829 |
| H                          | 2.722021  | 2.841776  | -0.792875 | C | -2.932405 | 0.251392  | -2.220301 |
| C                          | 1.809398  | 6.008322  | 0.001428  | C | -3.549328 | -0.933450 | -2.623746 |
| H                          | 0.224419  | 6.536815  | 1.355948  | C | -3.571446 | 1.079044  | -1.293770 |
| H                          | 3.318396  | 5.182807  | -1.287138 | C | -4.790307 | -1.284744 | -2.103726 |
| H                          | 2.073333  | 7.036695  | -0.216089 | H | -3.048372 | -1.584133 | -3.332578 |
| <b>PhNH<sub>2</sub>-TS</b> |           |           |           | C | -4.811656 | 0.720295  | -0.781281 |
| Symbol                     | X         | Y         | Z         | H | -3.086172 | 1.994317  | -0.972381 |
| F                          | 2.866113  | -3.993051 | 1.470151  | C | -5.427597 | -0.464741 | -1.178284 |
| F                          | 3.774030  | 3.418946  | 2.102904  | H | -5.254945 | -2.210936 | -2.419879 |
| F                          | 0.884403  | -2.221449 | 1.580763  | H | -5.293033 | 1.365859  | -0.055357 |
| C                          | 2.866635  | -2.956801 | 0.636220  | H | -6.389748 | -0.745032 | -0.768791 |
| C                          | 1.925952  | 4.297871  | 0.954764  | N | -1.632479 | 0.575822  | -2.677695 |
| C                          | 2.679226  | 3.217485  | 1.375363  | H | -1.510501 | 1.575785  | -2.801127 |
| C                          | 1.840650  | -2.025429 | 0.667159  | H | -1.406763 | 0.109927  | -3.550185 |
| C                          | 3.903439  | -2.803178 | -0.266764 |   |           |           |           |



**Al(C<sub>6</sub>F<sub>5</sub>)<sub>3</sub>**

| Symbol | X         | Y         | Z         |
|--------|-----------|-----------|-----------|
| F      | 2.568594  | 4.470436  | 1.159348  |
| F      | -5.155255 | -0.003892 | 1.151702  |
| F      | 2.263359  | 1.789733  | 1.169786  |
| C      | 1.503417  | 3.914462  | 0.591688  |
| C      | -4.354505 | -1.889139 | 0.001242  |
| C      | -4.140845 | -0.650642 | 0.587223  |
| C      | 1.326412  | 2.542259  | 0.578952  |
| C      | 0.538640  | 4.717986  | 0.003130  |
| F      | -3.524219 | -3.762349 | -1.148087 |
| C      | -3.303916 | -2.579220 | -0.584497 |
| F      | -2.680571 | 1.068635  | 1.166586  |
| C      | -2.863258 | -0.119482 | 0.576535  |
| C      | -2.043320 | -2.009110 | -0.573410 |
| C      | -1.784594 | -0.774238 | 0.001644  |
| C      | 0.222610  | 1.934830  | 0.000113  |
| C      | -0.581285 | 4.152457  | -0.587567 |
| F      | -1.050247 | -2.687891 | -1.161932 |
| C      | -0.716371 | 2.775465  | -0.577867 |
| F      | -1.494327 | 4.934339  | -1.154161 |
| F      | -1.797408 | 2.253727  | -1.171537 |
| C      | 1.564841  | -1.159442 | -0.002615 |
| F      | 0.416573  | -2.852758 | 1.167329  |
| F      | 2.854155  | 0.429134  | -1.172867 |
| C      | 1.537001  | -2.419321 | 0.575685  |
| C      | 2.762923  | -0.768536 | -0.580743 |
| C      | 2.634657  | -3.261612 | 0.585917  |
| C      | 3.885654  | -1.577092 | -0.593131 |
| F      | 2.581264  | -4.462499 | 1.152517  |
| F      | 5.019356  | -1.179606 | -1.161159 |
| C      | 3.813084  | -2.830419 | -0.004168 |
| F      | 0.687626  | 6.034155  | 0.005259  |
| F      | 4.875984  | -3.620812 | -0.005654 |
| F      | -5.569536 | -2.416632 | 0.001380  |
| Al     | 0.001442  | 0.000671  | -0.000394 |

**Al(C<sub>6</sub>F<sub>5</sub>)<sub>3</sub>-TS-A**

| Symbol | X         | Y         | Z         |
|--------|-----------|-----------|-----------|
| Si     | 3.341334  | 1.154931  | -1.972771 |
| H      | -0.479710 | -1.760992 | 0.211334  |
| F      | -6.698259 | 0.222906  | -0.800347 |
| F      | -3.991809 | 0.355238  | 4.960557  |

|   |           |           |           |
|---|-----------|-----------|-----------|
| F | -4.250954 | 0.895260  | 0.113246  |
| C | -5.686711 | -0.641985 | -0.885302 |
| C | -1.880931 | 1.336377  | 4.646787  |
| C | -2.924511 | 0.552020  | 4.185021  |
| C | -4.419673 | -0.326040 | -0.427281 |
| C | -5.897914 | -1.891565 | -1.446894 |
| F | 0.243639  | 2.290285  | 4.284069  |
| C | -0.769447 | 1.540036  | 3.845123  |
| F | -3.879085 | -0.773958 | 2.537138  |
| C | -2.836128 | -0.018362 | 2.923279  |
| C | -0.741187 | 0.948923  | 2.595370  |
| C | -1.751387 | 0.156799  | 2.084055  |
| C | -3.341395 | -1.190989 | -0.490324 |
| C | -4.851238 | -2.792780 | -1.536624 |
| F | 0.362180  | 1.179616  | 1.845723  |
| C | -3.603137 | -2.422542 | -1.058190 |
| F | -5.059195 | -3.995166 | -2.077584 |
| F | -2.625244 | -3.344727 | -1.168500 |
| C | -0.958334 | 0.930462  | -0.997221 |
| F | -1.807765 | 2.656597  | 0.383608  |
| F | -0.005354 | -0.604571 | -2.526023 |
| C | -1.253885 | 2.265831  | -0.776096 |
| C | -0.363904 | 0.666147  | -2.218553 |
| C | -1.017189 | 3.269574  | -1.703179 |
| C | -0.101581 | 1.626086  | -3.181060 |
| F | -1.341825 | 4.536866  | -1.447374 |
| F | 0.480006  | 1.314203  | -4.342561 |
| C | -0.436095 | 2.942874  | -2.915450 |
| F | -7.104570 | -2.223710 | -1.899157 |
| F | -0.188236 | 3.887394  | -3.818814 |
| F | -1.943249 | 1.887623  | 5.856253  |
| H | 2.492360  | 0.547235  | -3.025583 |
| C | 2.616581  | 2.775969  | -1.377449 |
| C | 2.093052  | 2.906894  | -0.087475 |
| C | 2.548694  | 3.880410  | -2.238855 |
| C | 1.507685  | 4.098984  | 0.332040  |
| H | 2.134194  | 2.074780  | 0.605826  |
| C | 1.970980  | 5.074039  | -1.822218 |
| H | 2.938225  | 3.808218  | -3.250492 |
| C | 1.449520  | 5.183966  | -0.534741 |
| H | 1.094048  | 4.170458  | 1.331595  |
| H | 1.917057  | 5.914964  | -2.503253 |
| H | 0.987902  | 6.110527  | -0.215239 |
| C | 4.075600  | -0.668128 | 1.585173  |

|                                                        |           |           |           |   |           |           |           |
|--------------------------------------------------------|-----------|-----------|-----------|---|-----------|-----------|-----------|
| C                                                      | 4.883841  | -0.961536 | 2.680236  | F | 3.348986  | -2.903697 | 1.049472  |
| C                                                      | 4.581603  | -0.179024 | 0.368969  | F | -3.000841 | -0.447376 | 1.915564  |
| C                                                      | 6.244739  | -0.749507 | 2.526703  | C | -4.063394 | -2.382601 | 1.150728  |
| H                                                      | 4.471573  | -1.341949 | 3.606705  | C | 3.253405  | -0.857854 | 2.213056  |
| C                                                      | 5.958332  | 0.023493  | 0.237611  | C | 2.702307  | -1.775806 | 1.334692  |
| C                                                      | 6.775453  | -0.263332 | 1.320293  | C | -3.079085 | -1.423736 | 0.993590  |
| H                                                      | 6.912324  | -0.961746 | 3.352571  | C | -4.146486 | -3.404394 | 0.217117  |
| H                                                      | 6.377583  | 0.394975  | -0.690319 | F | 3.140897  | 1.205655  | 3.324985  |
| H                                                      | 7.844376  | -0.109074 | 1.238806  | C | 2.584933  | 0.323376  | 2.496943  |
| C                                                      | 3.458742  | -0.075572 | -0.565379 | F | 1.000147  | -2.344044 | -0.160616 |
| C                                                      | 2.342010  | -0.477956 | 0.200434  | C | 1.492126  | -1.468494 | 0.741747  |
| H                                                      | 3.630923  | -1.268830 | -1.408140 | C | 1.368713  | 0.575696  | 1.885981  |
| N                                                      | 2.702705  | -0.838408 | 1.438292  | C | 0.794066  | -0.300639 | 0.981702  |
| C                                                      | 1.824724  | -1.319914 | 2.495897  | C | -2.175390 | -1.424632 | -0.054013 |
| H                                                      | 2.239929  | -2.236834 | 2.913883  | C | -3.257293 | -3.451897 | -0.844266 |
| H                                                      | 1.739452  | -0.559978 | 3.274571  | F | 0.756435  | 1.730106  | 2.186329  |
| H                                                      | 0.845686  | -1.529021 | 2.068585  | C | -2.291098 | -2.465049 | -0.957836 |
| H                                                      | 1.305745  | -0.547748 | -0.104739 | F | -3.344786 | -4.438362 | -1.734204 |
| C                                                      | 3.693109  | -3.278004 | -0.799694 | F | -1.451363 | -2.550644 | -2.001890 |
| C                                                      | 2.336769  | -3.636940 | -0.767031 | C | -1.443480 | 1.876585  | -0.231649 |
| C                                                      | 1.753063  | -4.311018 | 0.302095  | F | -3.742632 | 1.348114  | -0.100841 |
| C                                                      | 2.591356  | -4.641672 | 1.355661  | F | 0.792744  | 2.596629  | -0.416574 |
| C                                                      | 3.952495  | -4.293793 | 1.345085  | C | -2.771817 | 2.267050  | -0.195925 |
| C                                                      | 4.512689  | -3.599660 | 0.283351  | C | -0.519494 | 2.900548  | -0.350138 |
| C                                                      | 3.880288  | -2.478241 | -2.010045 | C | -3.168598 | 3.593525  | -0.262507 |
| C                                                      | 2.648388  | -2.574042 | -2.702487 | C | -0.861184 | 4.238082  | -0.424041 |
| H                                                      | 0.698805  | -4.559230 | 0.311165  | F | -4.454869 | 3.931065  | -0.223804 |
| H                                                      | 2.186323  | -5.173201 | 2.208097  | F | 0.063625  | 5.186656  | -0.545696 |
| H                                                      | 5.555927  | -3.304740 | 0.296730  | C | -2.203643 | 4.580955  | -0.376170 |
| H                                                      | 4.824554  | -2.303116 | -2.508913 | F | -5.078998 | -4.340938 | 0.341987  |
| N                                                      | 1.740796  | -3.189610 | -1.953074 | F | -2.564591 | 5.855592  | -0.446417 |
| C                                                      | 0.350758  | -3.457082 | -2.308249 | F | 4.432056  | -1.100091 | 2.772077  |
| H                                                      | 0.142717  | -2.998511 | -3.271153 | H | 0.611519  | -0.209501 | -1.709561 |
| H                                                      | 0.202631  | -4.535799 | -2.366859 | H | 2.634681  | -1.043172 | -4.111343 |
| H                                                      | -0.303942 | -3.029260 | -1.551216 | H | 3.897771  | -2.731203 | -3.031567 |
| H                                                      | 4.573194  | -4.564847 | 2.190516  | C | 3.962466  | -1.163922 | -1.519257 |
| H                                                      | 2.380390  | -2.166962 | -3.667208 | C | 3.238803  | 0.026523  | -1.507123 |
| Al                                                     | -1.562087 | -0.577751 | 0.216589  | C | 3.647823  | 1.120911  | -0.757829 |
| H                                                      | 4.704212  | 1.338661  | -2.523074 | C | 4.825328  | 0.999993  | -0.018506 |
|                                                        |           |           |           | C | 5.564128  | -0.180532 | -0.031463 |
|                                                        |           |           |           | C | 5.131589  | -1.273591 | -0.783348 |
|                                                        |           |           |           | C | 3.237167  | -2.184820 | -2.358662 |
|                                                        |           |           |           | C | 2.231687  | -1.313971 | -3.130323 |
|                                                        |           |           |           | H | 3.077405  | 2.040998  | -0.739339 |
| <b>Al(C<sub>6</sub>F<sub>5</sub>)<sub>3</sub>-TS-B</b> |           |           |           |   |           |           |           |
| Symbol                                                 | X         | Y         | Z         |   |           |           |           |
| H                                                      | -0.232983 | -0.272542 | -1.754516 |   |           |           |           |
| F                                                      | -4.916403 | -2.346517 | 2.171220  |   |           |           |           |

|    |           |           |           |
|----|-----------|-----------|-----------|
| H  | 5.163655  | 1.839591  | 0.577240  |
| H  | 5.696999  | -2.198232 | -0.787788 |
| H  | 2.730294  | -2.909656 | -1.717941 |
| N  | 2.067860  | -0.069899 | -2.324989 |
| C  | 1.780702  | 1.109107  | -3.151270 |
| H  | 2.608859  | 1.315936  | -3.835665 |
| H  | 0.875303  | 0.917676  | -3.730593 |
| H  | 1.607839  | 1.973847  | -2.512745 |
| H  | 6.475059  | -0.251490 | 0.549662  |
| H  | 1.258105  | -1.788325 | -3.269532 |
| Al | -0.823760 | 0.009504  | -0.092545 |

**Al(C<sub>6</sub>F<sub>5</sub>)<sub>3</sub>-TS-C**

| Symbol | X         | Y         | Z         |
|--------|-----------|-----------|-----------|
| F      | 2.647345  | 4.331718  | -2.980729 |
| F      | 5.480158  | -1.503689 | -1.040162 |
| F      | 1.895461  | 1.747082  | -2.745521 |
| C      | 1.995426  | 3.916431  | -1.896482 |
| C      | 3.842650  | -3.141276 | -0.642366 |
| C      | 4.197016  | -1.821449 | -0.863504 |
| C      | 1.602704  | 2.597702  | -1.746729 |
| C      | 1.688825  | 4.819779  | -0.890640 |
| F      | 2.183439  | -4.739657 | -0.168502 |
| C      | 2.517682  | -3.471841 | -0.408201 |
| F      | 3.618201  | 0.422176  | -1.007436 |
| C      | 3.212478  | -0.847027 | -0.844825 |
| C      | 1.572983  | -2.461225 | -0.405861 |
| C      | 1.876575  | -1.129387 | -0.628020 |
| C      | 0.927195  | 2.125592  | -0.636035 |
| C      | 1.000927  | 4.397422  | 0.235131  |
| F      | 0.299546  | -2.814233 | -0.148334 |
| C      | 0.631650  | 3.065659  | 0.333835  |
| F      | 0.703361  | 5.272370  | 1.195543  |
| F      | -0.046722 | 2.709325  | 1.444446  |
| C      | -1.231054 | -0.265191 | -1.508420 |
| F      | -0.314796 | -2.026552 | -2.788519 |
| F      | -2.325267 | 1.436908  | -0.298860 |
| C      | -1.378221 | -1.298214 | -2.416488 |
| C      | -2.384605 | 0.430162  | -1.199098 |
| C      | -2.598905 | -1.638036 | -2.979097 |
| C      | -3.622333 | 0.144399  | -1.743648 |
| F      | -2.707444 | -2.650123 | -3.838911 |
| F      | -4.710599 | 0.838683  | -1.402283 |
| C      | -3.726743 | -0.910985 | -2.633620 |

|    |           |           |           |
|----|-----------|-----------|-----------|
| F  | 2.050235  | 6.092952  | -1.008793 |
| F  | -4.911510 | -1.235911 | -3.141054 |
| F  | 4.776157  | -4.087673 | -0.628336 |
| C  | -3.801794 | -0.269519 | 1.693328  |
| C  | -4.816064 | -0.901360 | 0.979878  |
| C  | -2.588421 | -0.896078 | 2.017257  |
| C  | -4.559253 | -2.193598 | 0.546066  |
| H  | -5.744678 | -0.398572 | 0.740751  |
| C  | -2.346741 | -2.193042 | 1.560787  |
| C  | -3.337245 | -2.826919 | 0.823977  |
| H  | -5.311998 | -2.719856 | -0.028444 |
| H  | -1.402097 | -2.686089 | 1.760532  |
| H  | -3.166908 | -3.830453 | 0.453641  |
| C  | -1.746028 | 0.091636  | 2.699320  |
| C  | -2.559186 | 1.244472  | 2.749107  |
| H  | -0.814916 | 0.264175  | 1.629077  |
| N  | -3.742023 | 1.040476  | 2.168324  |
| C  | -4.769402 | 2.038824  | 1.913064  |
| H  | -4.868241 | 2.180867  | 0.836087  |
| H  | -5.718521 | 1.702663  | 2.330187  |
| H  | -4.475123 | 2.973997  | 2.382886  |
| H  | -2.320965 | 2.212140  | 3.169391  |
| Si | -0.453902 | -0.272373 | 4.030234  |
| H  | -0.073189 | 0.080746  | 1.070579  |
| H  | -0.877912 | -1.482895 | 4.767527  |
| C  | 1.254318  | -0.557463 | 3.311691  |
| C  | 1.794940  | -1.842237 | 3.200652  |
| C  | 2.030171  | 0.530065  | 2.879570  |
| C  | 3.079660  | -2.038043 | 2.694280  |
| H  | 1.217938  | -2.703434 | 3.523899  |
| C  | 3.308460  | 0.339839  | 2.369914  |
| H  | 1.632403  | 1.538639  | 2.945504  |
| C  | 3.838799  | -0.947155 | 2.287992  |
| H  | 3.486939  | -3.040653 | 2.626041  |
| H  | 3.894037  | 1.190565  | 2.041348  |
| H  | 4.841562  | -1.094974 | 1.902193  |
| Al | 0.423050  | 0.210102  | -0.519949 |
| H  | -0.426068 | 0.919702  | 4.906746  |

**B(2,6-Cl<sub>2</sub>C<sub>6</sub>H<sub>3</sub>)(p-**HC**<sub>6</sub>F<sub>4</sub>)<sub>2</sub>-TS-A**

| Symbol | X         | Y         | Z         |
|--------|-----------|-----------|-----------|
| Si     | 2.892874  | 2.649879  | -0.959240 |
| H      | -0.677002 | -0.884470 | -0.162120 |
| H      | 4.214848  | 3.312513  | -0.863152 |

|   |           |           |           |
|---|-----------|-----------|-----------|
| F | -4.783910 | -2.021773 | 3.719828  |
| C | -4.156795 | -2.472293 | -2.811027 |
| C | -2.792359 | -0.886237 | 4.256766  |
| C | -3.663764 | -1.404243 | 3.317456  |
| C | -3.619157 | -1.479890 | -1.997543 |
| C | -3.713442 | -3.778055 | -2.677691 |
| F | -0.770852 | 0.275203  | 4.641234  |
| C | -1.661014 | -0.249227 | 3.784320  |
| F | -4.327326 | -1.815674 | 1.128146  |
| C | -3.406941 | -1.296424 | 1.958324  |
| C | -1.428202 | -0.148898 | 2.424136  |
| C | -2.268539 | -0.680325 | 1.456483  |
| C | -2.613443 | -1.688017 | -1.043624 |
| C | -2.755219 | -4.072745 | -1.718894 |
| F | -0.304437 | 0.503972  | 2.045807  |
| C | -2.245569 | -3.040859 | -0.943544 |
| B | -1.845851 | -0.573781 | -0.119010 |
| C | -1.893635 | 0.977391  | -0.627372 |
| F | -3.836946 | 1.509602  | 0.613864  |
| F | 0.030760  | 0.696131  | -2.004695 |
| C | -2.837782 | 1.902727  | -0.195065 |
| C | -0.965847 | 1.484892  | -1.523042 |
| C | -2.853808 | 3.219070  | -0.618353 |
| C | -0.982514 | 2.791826  | -1.986415 |
| F | -3.790697 | 4.052288  | -0.140752 |
| F | -0.054066 | 3.184215  | -2.872646 |
| C | -1.927635 | 3.685922  | -1.533065 |
| H | 2.582456  | 2.464927  | -2.396994 |
| C | 1.570126  | 3.695899  | -0.141057 |
| C | 0.816523  | 3.247136  | 0.947707  |
| C | 1.318322  | 4.982403  | -0.638588 |
| C | -0.168334 | 4.050062  | 1.517625  |
| H | 0.987029  | 2.261072  | 1.363303  |
| C | 0.348487  | 5.793820  | -0.061237 |
| H | 1.881231  | 5.357436  | -1.488468 |
| C | -0.400163 | 5.325785  | 1.016569  |
| H | -0.751777 | 3.673518  | 2.350094  |
| H | 0.169634  | 6.787345  | -0.456014 |
| H | -1.167522 | 5.951627  | 1.457430  |
| C | 3.800949  | -0.434467 | 1.555752  |
| C | 4.646684  | -1.084815 | 2.449895  |
| C | 4.235886  | 0.585784  | 0.692452  |
| C | 5.973213  | -0.684482 | 2.459987  |
| H | 4.288312  | -1.872460 | 3.101314  |

|    |           |           |           |
|----|-----------|-----------|-----------|
| C  | 5.579683  | 0.969664  | 0.719575  |
| C  | 6.433859  | 0.330472  | 1.605108  |
| H  | 6.667860  | -1.161902 | 3.140017  |
| H  | 5.946577  | 1.748791  | 0.061620  |
| H  | 7.477489  | 0.618016  | 1.642320  |
| C  | 3.099609  | 0.962729  | -0.154912 |
| C  | 2.043059  | 0.149846  | 0.318888  |
| H  | 3.402682  | 0.245170  | -1.402131 |
| N  | 2.455364  | -0.668596 | 1.293027  |
| C  | 1.636588  | -1.652328 | 1.990242  |
| H  | 2.152377  | -2.612425 | 1.988143  |
| H  | 1.460327  | -1.322863 | 3.015326  |
| H  | 0.687041  | -1.748025 | 1.466036  |
| H  | 1.012983  | 0.107597  | -0.007372 |
| C  | 3.942127  | -1.784965 | -1.665070 |
| C  | 2.685962  | -2.410312 | -1.691387 |
| C  | 2.387564  | -3.549252 | -0.948267 |
| C  | 3.415871  | -4.072861 | -0.179255 |
| C  | 4.686199  | -3.473271 | -0.150102 |
| C  | 4.959470  | -2.324456 | -0.875880 |
| C  | 3.808460  | -0.561548 | -2.454105 |
| C  | 2.526021  | -0.644582 | -3.045959 |
| H  | 1.400681  | -3.995795 | -0.962972 |
| H  | 3.234879  | -4.961801 | 0.412761  |
| H  | 5.931118  | -1.847422 | -0.821240 |
| H  | 4.624728  | 0.001694  | -2.887027 |
| N  | 1.856443  | -1.680972 | -2.551311 |
| C  | 0.468890  | -2.038872 | -2.826301 |
| H  | 0.422301  | -3.094587 | -3.094248 |
| H  | -0.134553 | -1.848683 | -1.940230 |
| H  | 0.105358  | -1.430572 | -3.650616 |
| H  | 5.462770  | -3.911693 | 0.464670  |
| H  | 2.048484  | 0.042087  | -3.730287 |
| H  | -2.992571 | -0.970324 | 5.316003  |
| H  | -1.935498 | 4.714058  | -1.866979 |
| H  | -2.407624 | -5.086253 | -1.566963 |
| H  | -4.124513 | -4.562459 | -3.300501 |
| H  | -4.927196 | -2.217033 | -3.526770 |
| Cl | -4.364087 | 0.105501  | -2.194853 |
| Cl | -1.055656 | -3.543573 | 0.266570  |

**B(2,6-Cl<sub>2</sub>C<sub>6</sub>H<sub>3</sub>)(p-FC<sub>6</sub>F<sub>4</sub>)<sub>2</sub>-TS-B**

| Symbol | X         | Y         | Z         |
|--------|-----------|-----------|-----------|
| H      | -0.541714 | -0.368848 | -1.445403 |

|   |           |           |           |
|---|-----------|-----------|-----------|
| F | 3.320775  | -2.180365 | 1.443063  |
| C | -2.888788 | -3.196065 | 1.591764  |
| C | 2.696400  | -0.159589 | 2.487790  |
| C | 2.444790  | -1.181238 | 1.594539  |
| C | -2.260863 | -1.993388 | 1.311307  |
| C | -2.989573 | -4.148860 | 0.587649  |
| F | 1.955221  | 1.853741  | 3.455483  |
| C | 1.756880  | 0.847270  | 2.597507  |
| F | 1.115440  | -2.166004 | -0.060674 |
| C | 1.292939  | -1.171090 | 0.828548  |
| C | 0.604180  | 0.841409  | 1.828755  |
| C | 0.345476  | -0.159186 | 0.902063  |
| C | -1.701263 | -1.668389 | 0.068361  |
| C | -2.489150 | -3.873795 | -0.675065 |
| F | -0.272461 | 1.833388  | 2.027726  |
| C | -1.871354 | -2.651685 | -0.909070 |
| B | -0.941053 | -0.251734 | -0.064290 |
| C | -1.851726 | 1.055005  | -0.299420 |
| F | -3.942691 | -0.064240 | -0.103381 |
| F | 0.083827  | 2.370591  | -0.568348 |
| C | -3.242494 | 1.055772  | -0.310855 |
| C | -1.258030 | 2.287611  | -0.546054 |
| C | -3.977019 | 2.213639  | -0.534805 |
| C | -1.974341 | 3.444582  | -0.781021 |
| F | -5.310787 | 2.137212  | -0.522036 |
| F | -1.316487 | 4.583256  | -1.016165 |
| C | -3.356652 | 3.421895  | -0.774682 |
| H | 0.225934  | -0.249391 | -1.241760 |
| H | 2.748612  | -0.987618 | -3.693744 |
| H | 4.354406  | -2.139826 | -2.405165 |
| C | 3.970129  | -0.441495 | -1.099571 |
| C | 2.986088  | 0.533521  | -1.272550 |
| C | 3.107117  | 1.787133  | -0.683591 |
| C | 4.237995  | 2.042426  | 0.092216  |
| C | 5.222295  | 1.074364  | 0.272734  |
| C | 5.089040  | -0.178632 | -0.327062 |
| C | 3.552941  | -1.705487 | -1.806853 |
| C | 2.387704  | -1.215302 | -2.683497 |
| H | 2.348763  | 2.547995  | -0.811639 |
| H | 4.346951  | 3.013523  | 0.560784  |
| H | 5.849160  | -0.939728 | -0.190127 |
| H | 3.226911  | -2.456316 | -1.085030 |
| N | 1.904517  | 0.047426  | -2.059597 |
| C | 1.364945  | 0.979433  | -3.051469 |

|    |           |           |           |
|----|-----------|-----------|-----------|
| H  | 1.024753  | 1.891897  | -2.566871 |
| H  | 2.117656  | 1.231436  | -3.808231 |
| H  | 0.510892  | 0.511941  | -3.548036 |
| H  | 6.093442  | 1.295931  | 0.877247  |
| H  | 1.570386  | -1.932347 | -2.756966 |
| H  | 3.600677  | -0.145843 | 3.080852  |
| H  | -3.932692 | 4.319715  | -0.953608 |
| H  | -2.578140 | -4.591975 | -1.479024 |
| H  | -3.472154 | -5.097530 | 0.784749  |
| H  | -3.297319 | -3.373839 | 2.577570  |
| Cl | -2.244708 | -0.791606 | 2.590549  |
| Cl | -1.326140 | -2.381914 | -2.561372 |

**B(2,6-Cl<sub>2</sub>C<sub>6</sub>H<sub>3</sub>)(p-FC<sub>6</sub>F<sub>4</sub>)<sub>2</sub>-TS-C**

| Symbol | X         | Y         | Z         |
|--------|-----------|-----------|-----------|
| F      | 5.144021  | 1.657829  | -0.862653 |
| C      | 0.175259  | 4.618504  | 1.289280  |
| C      | 4.141026  | -0.247440 | -1.812430 |
| C      | 4.056290  | 0.901006  | -1.054841 |
| C      | 0.262326  | 3.457298  | 0.538384  |
| C      | 0.028162  | 4.518857  | 2.665694  |
| F      | 3.029646  | -2.158736 | -2.635933 |
| C      | 2.995854  | -1.009544 | -1.952045 |
| F      | 2.901276  | 2.393770  | 0.293890  |
| C      | 2.863535  | 1.283850  | -0.456012 |
| C      | 1.814376  | -0.606815 | -1.364299 |
| C      | 1.691180  | 0.554940  | -0.611650 |
| C      | 0.211735  | 2.160749  | 1.074163  |
| C      | -0.025245 | 3.268726  | 3.259818  |
| F      | 0.736782  | -1.402937 | -1.511158 |
| C      | 0.065453  | 2.133506  | 2.462567  |
| B      | 0.270923  | 0.908908  | 0.049765  |
| C      | -1.047232 | 0.879489  | -0.875591 |
| F      | 0.081402  | 0.925471  | -2.961780 |
| F      | -2.370792 | 0.853842  | 1.078352  |
| C      | -1.061320 | 0.942768  | -2.262079 |
| C      | -2.293460 | 0.942721  | -0.263057 |
| C      | -2.237896 | 1.074304  | -2.983924 |
| C      | -3.473127 | 1.095604  | -0.968096 |
| F      | -2.173244 | 1.133741  | -4.319878 |
| F      | -4.629820 | 1.179525  | -0.300350 |
| C      | -3.459996 | 1.159012  | -2.348211 |
| C      | -3.285505 | -1.933124 | 0.776733  |
| C      | -4.549904 | -1.757085 | 0.216458  |

|    |           |           |           |
|----|-----------|-----------|-----------|
| C  | -2.150153 | -2.277156 | 0.020486  |
| C  | -4.656431 | -1.936444 | -1.151531 |
| H  | -5.406524 | -1.483365 | 0.819849  |
| C  | -2.282810 | -2.435037 | -1.364812 |
| C  | -3.534037 | -2.265208 | -1.932753 |
| H  | -5.618929 | -1.807321 | -1.631613 |
| H  | -1.422207 | -2.676956 | -1.976753 |
| H  | -3.653755 | -2.382596 | -3.003190 |
| C  | -1.020554 | -2.389208 | 0.944738  |
| C  | -1.590912 | -2.132656 | 2.201239  |
| H  | -0.306000 | -0.859470 | 0.827033  |
| N  | -2.895697 | -1.833929 | 2.104663  |
| C  | -3.757962 | -1.360711 | 3.173985  |
| H  | -4.112404 | -0.357403 | 2.932423  |
| H  | -4.607717 | -2.033317 | 3.293742  |
| H  | -3.185636 | -1.329628 | 4.098246  |
| H  | -1.118151 | -2.153966 | 3.173686  |
| Si | 0.379374  | -3.611428 | 0.669445  |
| H  | 0.227008  | -0.182856 | 0.901232  |
| H  | 0.258452  | -4.139954 | -0.706341 |
| C  | 2.100591  | -2.911860 | 0.902690  |
| C  | 3.173597  | -3.467134 | 0.194065  |
| C  | 2.360664  | -1.846014 | 1.771034  |
| C  | 4.462712  | -2.966151 | 0.340806  |
| H  | 3.002021  | -4.288884 | -0.494257 |
| C  | 3.645197  | -1.328488 | 1.907647  |
| H  | 1.554441  | -1.398858 | 2.344370  |
| C  | 4.697738  | -1.888652 | 1.190133  |
| H  | 5.279907  | -3.402693 | -0.221835 |
| H  | 3.821216  | -0.487040 | 2.568305  |
| H  | 5.697889  | -1.482457 | 1.288387  |
| H  | 0.172699  | -4.729942 | 1.622789  |
| H  | 5.076635  | -0.556187 | -2.258750 |
| H  | -4.377238 | 1.264948  | -2.911598 |
| H  | -0.137353 | 3.163868  | 4.330609  |
| H  | -0.042133 | 5.412678  | 3.272294  |
| H  | 0.226650  | 5.581487  | 0.798923  |
| Cl | -0.022206 | 0.603518  | 3.331665  |
| Cl | 0.486138  | 3.663817  | -1.191501 |

**B(2,6-Cl<sub>2</sub>C<sub>6</sub>H<sub>3</sub>)(p-*HC*<sub>6</sub>F<sub>4</sub>)<sub>2</sub>**

| Symbol | X         | Y         | Z         |
|--------|-----------|-----------|-----------|
| F      | 4.788279  | -0.115108 | -1.135797 |
| C      | -0.251770 | 3.868400  | -1.182085 |

|    |           |           |           |
|----|-----------|-----------|-----------|
| C  | 3.876850  | -1.885743 | 0.119309  |
| C  | 3.738066  | -0.679205 | -0.537559 |
| C  | -0.249449 | 2.482769  | -1.156138 |
| C  | 0.000290  | 4.554631  | 0.000690  |
| F  | 2.858724  | -3.598302 | 1.375041  |
| C  | 2.762190  | -2.439071 | 0.722209  |
| F  | 2.449555  | 1.123273  | -1.241957 |
| C  | 2.511938  | -0.035065 | -0.583535 |
| C  | 1.536667  | -1.801514 | 0.657532  |
| C  | 1.370203  | -0.579657 | 0.004280  |
| C  | 0.000386  | 1.748572  | -0.002831 |
| C  | 0.252412  | 3.865453  | 1.181732  |
| F  | 0.502873  | -2.380788 | 1.272152  |
| C  | 0.250170  | 2.479889  | 1.152300  |
| B  | 0.000292  | 0.174309  | -0.004800 |
| C  | -1.369910 | -0.579179 | -0.008736 |
| F  | -0.507057 | -2.383153 | -1.275734 |
| F  | -2.444829 | 1.126676  | 1.237198  |
| C  | -1.538784 | -1.802185 | -0.659236 |
| C  | -2.509729 | -0.032880 | 0.581158  |
| C  | -2.764844 | -2.439161 | -0.719398 |
| C  | -3.736337 | -0.676402 | 0.539717  |
| F  | -2.863795 | -3.599531 | -1.369839 |
| F  | -4.784613 | -0.110602 | 1.139743  |
| C  | -3.877563 | -1.884088 | -0.114517 |
| H  | 4.835129  | -2.386236 | 0.161975  |
| H  | -4.836231 | -2.384125 | -0.153664 |
| Cl | 0.534938  | 1.581316  | 2.629087  |
| Cl | -0.533951 | 1.587948  | -2.635258 |
| H  | 0.444455  | 4.390570  | 2.107892  |
| H  | 0.000268  | 5.637196  | 0.002048  |
| H  | -0.443793 | 4.395819  | -2.106940 |

**Ga(C<sub>6</sub>F<sub>5</sub>)<sub>3</sub>**

| Symbol | X         | Y         | Z         |
|--------|-----------|-----------|-----------|
| F      | -3.765707 | 3.543238  | -1.145742 |
| F      | 4.960017  | 1.471767  | -1.168540 |
| F      | -2.690918 | 1.069029  | -1.162934 |
| C      | -2.581923 | 3.323043  | -0.583368 |
| C      | 4.741195  | -0.554813 | 0.000383  |
| C      | 4.177564  | 0.563356  | -0.595270 |
| C      | -2.012580 | 2.061948  | -0.575532 |
| C      | -1.891820 | 4.373544  | 0.002180  |
| F      | 4.488436  | -2.578012 | 1.167849  |

|    |           |           |           |
|----|-----------|-----------|-----------|
| C  | 3.935318  | -1.513707 | 0.595458  |
| F  | 2.279896  | 1.783806  | -1.179688 |
| C  | 2.800987  | 0.704177  | -0.584430 |
| C  | 2.563155  | -1.334913 | 0.584037  |
| C  | 1.962682  | -0.231377 | -0.000106 |
| C  | -0.777039 | 1.807926  | -0.002422 |
| C  | -0.651664 | 4.160010  | 0.584437  |
| F  | 1.808356  | -2.266608 | 1.178849  |
| C  | -0.117763 | 2.883262  | 0.571050  |
| F  | -0.003223 | 5.174078  | 1.147463  |
| F  | 1.072146  | 2.699021  | 1.155757  |
| C  | -1.177096 | -1.579587 | 0.005033  |
| F  | 0.412419  | -2.872725 | -1.159598 |
| F  | -2.865352 | -0.418433 | 1.169720  |
| C  | -0.787118 | -2.776626 | -0.573562 |
| C  | -2.437220 | -1.540852 | 0.579845  |
| C  | -1.602999 | -3.894218 | -0.588505 |
| C  | -3.284118 | -2.634939 | 0.585772  |
| F  | -1.209307 | -5.030287 | -1.154469 |
| F  | -4.486287 | -2.575399 | 1.148994  |
| C  | -2.857958 | -3.815301 | -0.003909 |
| F  | -2.421436 | 5.587761  | 0.005595  |
| F  | -3.654791 | -4.873584 | -0.008895 |
| F  | 6.056987  | -0.708249 | 0.000856  |
| Ga | 0.005137  | -0.001749 | 0.001178  |

**Ga(C<sub>6</sub>F<sub>5</sub>)<sub>3</sub>-TS-A**

| Symbol | X         | Y         | Z         |
|--------|-----------|-----------|-----------|
| Si     | 3.446132  | 1.125720  | -1.962757 |
| H      | -0.433573 | -1.772680 | 0.187550  |
| H      | 4.817381  | 1.285314  | -2.499597 |
| F      | -6.656369 | 0.318566  | -0.782407 |
| F      | -3.948116 | 0.418585  | 4.933213  |
| F      | -4.198834 | 0.949276  | 0.134420  |
| C      | -5.652911 | -0.553324 | -0.891410 |
| C      | -1.836611 | 1.401546  | 4.629102  |
| C      | -2.873833 | 0.609635  | 4.165721  |
| C      | -4.381231 | -0.257214 | -0.431916 |
| C      | -5.879096 | -1.787992 | -1.479642 |
| F      | 0.288422  | 2.357393  | 4.277312  |
| C      | -0.717966 | 1.599384  | 3.836048  |
| F      | -3.808559 | -0.736262 | 2.519431  |
| C      | -2.772796 | 0.026075  | 2.910961  |
| C      | -0.674383 | 0.995984  | 2.592304  |

|   |           |           |           |
|---|-----------|-----------|-----------|
| C | -1.679430 | 0.197259  | 2.084151  |
| C | -3.315383 | -1.133437 | -0.521251 |
| C | -4.841590 | -2.697034 | -1.593955 |
| F | 0.434354  | 1.221517  | 1.850008  |
| C | -3.587865 | -2.349952 | -1.112885 |
| F | -5.063323 | -3.885363 | -2.160238 |
| F | -2.616823 | -3.276298 | -1.245274 |
| C | -0.862067 | 0.963204  | -1.029100 |
| F | -1.717220 | 2.679225  | 0.360546  |
| F | 0.098288  | -0.568462 | -2.556540 |
| C | -1.152242 | 2.296469  | -0.796251 |
| C | -0.255828 | 0.701734  | -2.243878 |
| C | -0.894988 | 3.306335  | -1.711298 |
| C | 0.024299  | 1.669472  | -3.193785 |
| F | -1.210556 | 4.574240  | -1.446489 |
| F | 0.617510  | 1.364313  | -4.351330 |
| C | -0.303727 | 2.986277  | -2.920444 |
| F | -7.091244 | -2.098377 | -1.933588 |
| F | -0.039434 | 3.936861  | -3.813114 |
| F | -1.911824 | 1.965621  | 5.832283  |
| H | 2.596893  | 0.531204  | -3.022653 |
| C | 2.742827  | 2.760332  | -1.378116 |
| C | 2.205257  | 2.904460  | -0.095186 |
| C | 2.704498  | 3.863061  | -2.243534 |
| C | 1.634608  | 4.107519  | 0.312846  |
| H | 2.223660  | 2.074802  | 0.602087  |
| C | 2.141549  | 5.067631  | -1.838066 |
| H | 3.105175  | 3.781127  | -3.250023 |
| C | 1.605225  | 5.190449  | -0.558056 |
| H | 1.209287  | 4.189261  | 1.306667  |
| H | 2.110455  | 5.906982  | -2.522439 |
| H | 1.154691  | 6.125391  | -0.247287 |
| C | 4.123480  | -0.702720 | 1.603639  |
| C | 4.919671  | -1.012600 | 2.702951  |
| C | 4.646173  | -0.230565 | 0.387873  |
| C | 6.286050  | -0.834957 | 2.554164  |
| H | 4.494345  | -1.379707 | 3.628887  |
| C | 6.028014  | -0.063570 | 0.261043  |
| C | 6.833416  | -0.366696 | 1.348130  |
| H | 6.944939  | -1.060752 | 3.383405  |
| H | 6.460027  | 0.293555  | -0.666686 |
| H | 7.906186  | -0.239655 | 1.270352  |
| C | 3.530110  | -0.104108 | -0.552023 |
| C | 2.400958  | -0.476099 | 0.210861  |

|    |           |           |           |
|----|-----------|-----------|-----------|
| H  | 3.683885  | -1.305611 | -1.385399 |
| N  | 2.747344  | -0.840056 | 1.451615  |
| C  | 1.855274  | -1.299927 | 2.506867  |
| H  | 2.242715  | -2.230995 | 2.920470  |
| H  | 1.792210  | -0.541359 | 3.288927  |
| H  | 0.870337  | -1.477629 | 2.079400  |
| H  | 1.364635  | -0.516871 | -0.097922 |
| C  | 3.683069  | -3.314025 | -0.765770 |
| C  | 2.318933  | -3.644085 | -0.769462 |
| C  | 1.691707  | -4.300327 | 0.286244  |
| C  | 2.493188  | -4.642851 | 1.364272  |
| C  | 3.861338  | -4.323993 | 1.390023  |
| C  | 4.465543  | -3.647871 | 0.340924  |
| C  | 3.921202  | -2.525516 | -1.974401 |
| C  | 2.707660  | -2.599059 | -2.700652 |
| H  | 0.632643  | -4.526530 | 0.267595  |
| H  | 2.053310  | -5.160857 | 2.207713  |
| H  | 5.514288  | -3.375621 | 0.381479  |
| H  | 4.882605  | -2.373596 | -2.447514 |
| N  | 1.766230  | -3.191290 | -1.974345 |
| C  | 0.380890  | -3.428327 | -2.367588 |
| H  | 0.218298  | -2.992451 | -3.349674 |
| H  | 0.202799  | -4.503467 | -2.401329 |
| H  | -0.285833 | -2.960209 | -1.645979 |
| H  | 4.452468  | -4.604025 | 2.253561  |
| H  | 2.476560  | -2.193149 | -3.675250 |
| Ga | -1.492118 | -0.567874 | 0.196469  |

**Ga(C<sub>6</sub>F<sub>5</sub>)<sub>3</sub>-TS-B**

| Symbol | X         | Y         | Z         |
|--------|-----------|-----------|-----------|
| H      | -0.141737 | -0.242766 | -1.796810 |
| F      | -4.806945 | -2.521463 | 2.149113  |
| F      | 3.548423  | -2.761181 | 1.118163  |
| F      | -2.977692 | -0.540459 | 1.901557  |
| C      | -3.936245 | -2.531160 | 1.142850  |
| C      | 3.307491  | -0.750927 | 2.317806  |
| C      | 2.840835  | -1.667402 | 1.390119  |
| C      | -2.994917 | -1.528799 | 0.991099  |
| C      | -3.957394 | -3.567250 | 0.222019  |
| F      | 3.046763  | 1.272491  | 3.480066  |
| C      | 2.575989  | 0.392333  | 2.598198  |
| F      | 1.236985  | -2.273660 | -0.196635 |
| C      | 1.647992  | -1.400282 | 0.744362  |
| C      | 1.377892  | 0.606202  | 1.937261  |

|    |           |           |           |
|----|-----------|-----------|-----------|
| C  | 0.890867  | -0.270359 | 0.985474  |
| C  | -2.076959 | -1.505667 | -0.042418 |
| C  | -3.049137 | -3.586666 | -0.823917 |
| F  | 0.693224  | 1.717395  | 2.243670  |
| C  | -2.125348 | -2.559143 | -0.935411 |
| F  | -3.075956 | -4.587124 | -1.702223 |
| F  | -1.262049 | -2.619225 | -1.960676 |
| C  | -1.460322 | 1.869165  | -0.230005 |
| F  | -3.729208 | 1.216669  | -0.166179 |
| F  | 0.744117  | 2.698896  | -0.345528 |
| C  | -2.807107 | 2.186906  | -0.224451 |
| C  | -0.581901 | 2.934390  | -0.312052 |
| C  | -3.267646 | 3.492895  | -0.286348 |
| C  | -0.992155 | 4.253302  | -0.380718 |
| F  | -4.569991 | 3.764708  | -0.277486 |
| F  | -0.114540 | 5.249568  | -0.466494 |
| C  | -2.350857 | 4.528526  | -0.363865 |
| F  | -4.847935 | -4.544656 | 0.344454  |
| F  | -2.773059 | 5.784757  | -0.428995 |
| F  | 4.472410  | -0.955471 | 2.920424  |
| H  | 0.715148  | -0.166306 | -1.809565 |
| H  | 2.757452  | -0.771139 | -4.251905 |
| H  | 4.000963  | -2.526114 | -3.250114 |
| C  | 4.001355  | -1.067934 | -1.631732 |
| C  | 3.270045  | 0.115918  | -1.564715 |
| C  | 3.648261  | 1.164969  | -0.738547 |
| C  | 4.804778  | 1.003831  | 0.025243  |
| C  | 5.553220  | -0.169210 | -0.040923 |
| C  | 5.150892  | -1.215268 | -0.872200 |
| C  | 3.312868  | -2.032735 | -2.564054 |
| C  | 2.326281  | -1.116873 | -3.307067 |
| H  | 3.070034  | 2.078739  | -0.679358 |
| H  | 5.120138  | 1.806010  | 0.682387  |
| H  | 5.724797  | -2.133510 | -0.918970 |
| H  | 2.789900  | -2.802644 | -1.992608 |
| N  | 2.122773  | 0.061103  | -2.417619 |
| C  | 1.816681  | 1.293977  | -3.151652 |
| H  | 1.588736  | 2.093648  | -2.448308 |
| H  | 2.658504  | 1.588756  | -3.784910 |
| H  | 0.938438  | 1.118803  | -3.775550 |
| H  | 6.447718  | -0.271056 | 0.560861  |
| H  | 1.362004  | -1.586407 | -3.510970 |
| Ga | -0.764683 | 0.001245  | -0.094389 |



**Ga(C<sub>6</sub>F<sub>5</sub>)<sub>3</sub>-TS-C**

| Symbol | X         | Y         | Z         |
|--------|-----------|-----------|-----------|
| F      | 4.052835  | -3.596273 | 1.643976  |
| F      | 5.024586  | 3.468541  | 1.346048  |
| F      | 2.479664  | -1.441365 | 2.024911  |
| C      | 3.515077  | -2.966250 | 0.602469  |
| C      | 3.303507  | 4.559349  | 0.172104  |
| C      | 3.832672  | 3.418951  | 0.753934  |
| C      | 2.695450  | -1.862283 | 0.771889  |
| C      | 3.779548  | -3.415807 | -0.682499 |
| F      | 1.561555  | 5.612299  | -1.001866 |
| C      | 2.063025  | 4.511599  | -0.443830 |
| F      | 3.639521  | 1.157134  | 1.283297  |
| C      | 3.100888  | 2.244199  | 0.705309  |
| C      | 1.370029  | 3.312364  | -0.469162 |
| C      | 1.861547  | 2.151640  | 0.099048  |
| C      | 2.116670  | -1.185424 | -0.287618 |
| C      | 3.239675  | -2.752336 | -1.771920 |
| F      | 0.177682  | 3.309949  | -1.085859 |
| C      | 2.435588  | -1.645541 | -1.549918 |
| F      | 3.486420  | -3.191255 | -3.005802 |
| F      | 1.948697  | -1.016093 | -2.638128 |
| C      | -0.531685 | 0.085219  | 1.412263  |
| F      | -1.178301 | 2.340446  | 1.181671  |
| F      | -0.058916 | -2.212321 | 1.733625  |
| C      | -1.376437 | 1.130665  | 1.739108  |
| C      | -0.794159 | -1.125936 | 2.027984  |
| C      | -2.440165 | 1.002306  | 2.615168  |
| C      | -1.819250 | -1.292822 | 2.944136  |
| F      | -3.248936 | 2.026877  | 2.881092  |
| F      | -2.034665 | -2.466159 | 3.536150  |
| C      | -2.655486 | -0.224495 | 3.221689  |
| F      | 4.553337  | -4.478864 | -0.868243 |
| F      | -3.677238 | -0.385460 | 4.056236  |
| F      | 3.985311  | 5.699166  | 0.202724  |
| C      | -1.949450 | -2.874729 | -0.546082 |
| C      | -2.461443 | -3.647127 | 0.493075  |
| C      | -2.503063 | -1.647780 | -0.950188 |
| C      | -3.592281 | -3.164591 | 1.128234  |
| H      | -1.999571 | -4.579708 | 0.791955  |
| C      | -3.637295 | -1.172399 | -0.274972 |
| C      | -4.168880 | -1.941862 | 0.748300  |
| H      | -4.030026 | -3.731150 | 1.940300  |
| H      | -4.100499 | -0.231841 | -0.546294 |

|    |           |           |           |
|----|-----------|-----------|-----------|
| H  | -5.048492 | -1.589553 | 1.274525  |
| C  | -1.700233 | -1.160470 | -2.083872 |
| C  | -0.757761 | -2.191128 | -2.297879 |
| H  | -0.701229 | -0.217818 | -1.600105 |
| N  | -0.867630 | -3.153787 | -1.381961 |
| C  | 0.049699  | -4.265746 | -1.180472 |
| H  | 0.619205  | -4.097000 | -0.262977 |
| H  | -0.513046 | -5.195087 | -1.098396 |
| H  | 0.723751  | -4.328345 | -2.032121 |
| H  | 0.023932  | -2.236277 | -3.044469 |
| Si | -2.352236 | -0.006913 | -3.428296 |
| H  | -0.053345 | 0.510073  | -1.403131 |
| H  | -3.196717 | -0.747648 | -4.390612 |
| C  | -3.388389 | 1.276834  | -2.548984 |
| C  | -4.748504 | 1.421343  | -2.842871 |
| C  | -2.853244 | 2.020455  | -1.487026 |
| C  | -5.554639 | 2.274296  | -2.092409 |
| H  | -5.191629 | 0.851894  | -3.653634 |
| C  | -3.656383 | 2.864612  | -0.729192 |
| H  | -1.801464 | 1.942609  | -1.232952 |
| C  | -5.010885 | 2.989106  | -1.030632 |
| H  | -6.607215 | 2.372051  | -2.330715 |
| H  | -3.223846 | 3.417348  | 0.096217  |
| H  | -5.639657 | 3.643049  | -0.437722 |
| Ga | 0.900862  | 0.388219  | 0.035964  |
| H  | -1.168587 | 0.559025  | -4.114483 |

**CH-a-TS**

| Symbol | X         | Y         | Z         |
|--------|-----------|-----------|-----------|
| F      | -0.455144 | 4.114273  | -3.872508 |
| F      | 5.429142  | 2.120131  | -1.231472 |
| F      | 0.521435  | 1.677801  | -3.281215 |
| C      | -0.412267 | 3.701562  | -2.608284 |
| C      | 5.084765  | -0.000164 | -0.287466 |
| C      | 4.590441  | 1.154131  | -0.863123 |
| C      | 0.075622  | 2.449512  | -2.281941 |
| C      | -0.856712 | 4.537091  | -1.595474 |
| F      | 4.673707  | -2.113968 | 0.659450  |
| C      | 4.207739  | -1.001581 | 0.097224  |
| F      | 2.827865  | 2.450532  | -1.606354 |
| C      | 3.220755  | 1.304552  | -1.040488 |
| C      | 2.855869  | -0.801480 | -0.082138 |
| C      | 2.302818  | 0.336761  | -0.654919 |
| C      | 0.148021  | 1.979077  | -0.978409 |

|    |           |           |           |
|----|-----------|-----------|-----------|
| C  | -0.800311 | 4.109653  | -0.281251 |
| F  | 2.032014  | -1.776039 | 0.346717  |
| C  | -0.298598 | 2.848216  | -0.000106 |
| B  | 0.704500  | 0.489416  | -0.726078 |
| F  | -1.225182 | 4.907613  | 0.696160  |
| F  | -0.275925 | 2.486891  | 1.295474  |
| C  | -0.165930 | -0.630952 | -1.483324 |
| F  | 1.644946  | -1.873608 | -2.380008 |
| F  | -2.129491 | 0.414384  | -0.681260 |
| C  | 0.330518  | -1.709679 | -2.204729 |
| C  | -1.553871 | -0.571926 | -1.387305 |
| C  | -0.486939 | -2.681439 | -2.761226 |
| C  | -2.402538 | -1.519825 | -1.928800 |
| F  | 0.037343  | -3.723548 | -3.400679 |
| F  | -3.719959 | -1.445674 | -1.742534 |
| C  | -1.860588 | -2.590194 | -2.618375 |
| F  | -1.330353 | 5.743801  | -1.886268 |
| F  | -2.648912 | -3.530515 | -3.123128 |
| F  | 6.388214  | -0.143330 | -0.077821 |
| H  | -0.053988 | -0.318096 | 1.066816  |
| Si | 0.653330  | -1.667367 | 3.251453  |
| H  | 0.440349  | 0.310291  | 0.586679  |
| H  | 0.999189  | -3.053247 | 2.880319  |
| C  | 2.165443  | -0.573298 | 3.112702  |
| C  | 3.434810  | -1.131794 | 3.309606  |
| C  | 2.079954  | 0.792916  | 2.818658  |
| C  | 4.582530  | -0.351425 | 3.213059  |
| H  | 3.535921  | -2.191714 | 3.521084  |
| C  | 3.226607  | 1.572549  | 2.700452  |
| H  | 1.115992  | 1.264301  | 2.659479  |
| C  | 4.479514  | 1.000413  | 2.899480  |
| H  | 5.556885  | -0.803255 | 3.357327  |
| H  | 3.139938  | 2.624216  | 2.452750  |
| H  | 5.374440  | 1.604556  | 2.802819  |
| H  | 0.109896  | -1.644194 | 4.628292  |
| C  | -2.810936 | -0.019957 | 2.072413  |
| C  | -1.584603 | 0.100991  | 2.619642  |
| C  | -0.777859 | -1.036914 | 2.172553  |
| C  | -1.687534 | -1.807104 | 1.425433  |
| O  | -2.867661 | -1.188881 | 1.354530  |
| H  | -1.236954 | 0.931886  | 3.212632  |
| C  | -3.995843 | 0.830128  | 2.042156  |
| C  | -4.168193 | 1.814595  | 3.018968  |
| C  | -4.944635 | 0.684469  | 1.026842  |

|   |           |           |           |
|---|-----------|-----------|-----------|
| C | -5.277804 | 2.645856  | 2.978205  |
| H | -3.439930 | 1.918158  | 3.815187  |
| C | -6.056003 | 1.517310  | 0.996378  |
| H | -4.795745 | -0.064233 | 0.258362  |
| C | -6.225304 | 2.497617  | 1.968659  |
| H | -5.407839 | 3.406248  | 3.738353  |
| H | -6.788062 | 1.404387  | 0.206120  |
| H | -7.092499 | 3.145990  | 1.940167  |
| C | -1.626752 | -3.098593 | 0.744598  |
| C | -0.406918 | -3.686089 | 0.399272  |
| C | -2.825081 | -3.732893 | 0.381901  |
| C | -0.384402 | -4.882818 | -0.305755 |
| H | 0.522884  | -3.193299 | 0.639505  |
| C | -2.793754 | -4.927236 | -0.320384 |
| H | -3.772124 | -3.280639 | 0.646541  |
| C | -1.574392 | -5.502578 | -0.671421 |
| H | 0.566297  | -5.317641 | -0.588314 |
| H | -3.722412 | -5.405021 | -0.605865 |
| H | -1.553239 | -6.427067 | -1.235073 |

#### CH-b-TS

| Symbol | X         | Y         | Z         |
|--------|-----------|-----------|-----------|
| F      | 4.222937  | -1.693139 | -2.997759 |
| F      | -3.073895 | -4.155986 | -2.536394 |
| F      | 1.966836  | -0.268619 | -3.067913 |
| C      | 3.295671  | -1.879712 | -2.061825 |
| C      | -4.097371 | -2.382523 | -1.387270 |
| C      | -2.973056 | -2.975418 | -1.929330 |
| C      | 2.119241  | -1.149209 | -2.074136 |
| C      | 3.513638  | -2.811215 | -1.059698 |
| F      | -5.077103 | -0.561977 | -0.267927 |
| C      | -3.990247 | -1.151168 | -0.759274 |
| F      | -0.708216 | -2.939200 | -2.420882 |
| C      | -1.747408 | -2.326957 | -1.842589 |
| C      | -2.745991 | -0.566754 | -0.651082 |
| C      | -1.588672 | -1.104084 | -1.207456 |
| C      | 1.138116  | -1.274007 | -1.098058 |
| C      | 2.547467  | -2.999797 | -0.089155 |
| F      | -2.675395 | 0.596119  | 0.018757  |
| C      | 1.395503  | -2.233604 | -0.131777 |
| B      | -0.179996 | -0.350386 | -1.042668 |
| F      | 2.731697  | -3.898008 | 0.877626  |
| F      | 0.507764  | -2.440067 | 0.863097  |
| C      | -0.040625 | 1.177455  | -1.526221 |

|    |           |           |           |
|----|-----------|-----------|-----------|
| F  | -2.231977 | 1.382621  | -2.435311 |
| F  | 2.221995  | 1.259913  | -0.828699 |
| C  | -1.076724 | 1.942485  | -2.060167 |
| C  | 1.130573  | 1.891797  | -1.273700 |
| C  | -0.993762 | 3.314401  | -2.233920 |
| C  | 1.253392  | 3.260332  | -1.433888 |
| F  | -2.036820 | 4.003151  | -2.692293 |
| F  | 2.386597  | 3.882932  | -1.121384 |
| C  | 0.172456  | 3.982030  | -1.904673 |
| F  | 4.638718  | -3.516623 | -1.033202 |
| F  | 0.253119  | 5.298134  | -2.049720 |
| F  | -5.276302 | -2.990997 | -1.455551 |
| H  | -0.334462 | 0.280717  | 1.091100  |
| Si | -1.604786 | 0.501699  | 3.509552  |
| H  | -0.299101 | -0.198444 | 0.333543  |
| H  | -2.362153 | 1.766839  | 3.504945  |
| C  | -2.646390 | -0.894330 | 2.823373  |
| C  | -4.038990 | -0.776656 | 2.751777  |
| C  | -2.064222 | -2.104787 | 2.425743  |
| C  | -4.823327 | -1.838312 | 2.309330  |
| H  | -4.521583 | 0.152179  | 3.038108  |
| C  | -2.840155 | -3.158637 | 1.957942  |
| H  | -0.990926 | -2.242576 | 2.475663  |
| C  | -4.225331 | -3.027075 | 1.905731  |
| H  | -5.899531 | -1.727930 | 2.257180  |
| H  | -2.365354 | -4.080181 | 1.641955  |
| H  | -4.836299 | -3.845896 | 1.543331  |
| H  | -1.136937 | 0.173112  | 4.875450  |
| C  | 2.178177  | 0.480463  | 2.178186  |
| C  | -0.022089 | 0.751610  | 2.494038  |
| C  | 0.610314  | 1.937017  | 2.027428  |
| H  | 0.995522  | -1.113347 | 2.822839  |
| C  | 3.438299  | -0.228967 | 1.942121  |
| C  | 3.710031  | -1.452576 | 2.560292  |
| C  | 4.336046  | 0.295836  | 1.008216  |
| C  | 4.858116  | -2.157994 | 2.226839  |
| H  | 3.037207  | -1.857120 | 3.308938  |
| C  | 5.479026  | -0.418178 | 0.675348  |
| H  | 4.109591  | 1.243777  | 0.538792  |
| C  | 5.737328  | -1.647530 | 1.276155  |
| H  | 5.060452  | -3.110369 | 2.700174  |
| H  | 6.164207  | -0.020052 | -0.062921 |
| H  | 6.622767  | -2.208469 | 1.003618  |
| C  | -0.010534 | 3.214086  | 1.646893  |

|   |           |           |          |
|---|-----------|-----------|----------|
| C | -1.339479 | 3.281290  | 1.222193 |
| C | 0.777598  | 4.370510  | 1.625616 |
| C | -1.878337 | 4.491200  | 0.797801 |
| H | -1.944052 | 2.384086  | 1.175271 |
| C | 0.235643  | 5.574933  | 1.201346 |
| H | 1.815257  | 4.303816  | 1.927725 |
| C | -1.093664 | 5.639076  | 0.788354 |
| H | -2.903739 | 4.528470  | 0.450254 |
| H | 0.854046  | 6.463709  | 1.179004 |
| H | -1.509343 | 6.577299  | 0.441846 |
| N | 1.931971  | 1.744663  | 1.844336 |
| N | 1.070925  | -0.121230 | 2.646772 |

### CH-c-TS

| Symbol | X         | Y         | Z         |
|--------|-----------|-----------|-----------|
| F      | -0.972462 | 3.913364  | -3.969304 |
| F      | 5.202694  | 2.595570  | -1.212504 |
| F      | 0.239794  | 1.590777  | -3.367761 |
| C      | -0.825217 | 3.548793  | -2.698095 |
| C      | 5.058346  | 0.453879  | -0.264705 |
| C      | 4.459442  | 1.551877  | -0.851365 |
| C      | -0.214266 | 2.353531  | -2.364808 |
| C      | -1.284701 | 4.377096  | -1.686390 |
| F      | 4.850739  | -1.692349 | 0.673623  |
| C      | 4.281618  | -0.630968 | 0.108788  |
| F      | 2.586693  | 2.658211  | -1.632680 |
| C      | 3.084812  | 1.562703  | -1.049979 |
| C      | 2.918551  | -0.568578 | -0.088183 |
| C      | 2.263144  | 0.508371  | -0.672883 |
| C      | -0.032877 | 1.933833  | -1.054522 |
| C      | -1.118611 | 4.000995  | -0.365614 |
| F      | 2.194328  | -1.621145 | 0.329917  |
| C      | -0.494695 | 2.797142  | -0.077275 |
| B      | 0.662638  | 0.508814  | -0.783464 |
| F      | -1.553727 | 4.794017  | 0.610647  |
| F      | -0.361872 | 2.487032  | 1.223518  |
| C      | -0.087535 | -0.703013 | -1.526044 |
| F      | 1.835157  | -1.779844 | -2.398503 |
| F      | -2.150228 | 0.175013  | -0.771692 |
| C      | 0.511572  | -1.745141 | -2.223256 |
| C      | -1.472422 | -0.780536 | -1.427129 |
| C      | -0.206394 | -2.809194 | -2.748377 |
| C      | -2.219573 | -1.836194 | -1.915134 |
| F      | 0.418270  | -3.809087 | -3.364502 |

|    |           |           |           |
|----|-----------|-----------|-----------|
| F  | -3.536386 | -1.893709 | -1.686236 |
| C  | -1.580102 | -2.864468 | -2.583155 |
| F  | -1.876372 | 5.528724  | -1.984192 |
| F  | -2.268616 | -3.902236 | -3.038954 |
| F  | 6.366253  | 0.443073  | -0.036674 |
| H  | -0.058929 | -0.299243 | 1.036477  |
| Si | 0.718996  | -1.627082 | 3.269093  |
| H  | 0.384966  | 0.314253  | 0.550384  |
| H  | 1.166145  | -2.983154 | 2.890092  |
| C  | 2.158547  | -0.433406 | 3.117432  |
| C  | 3.463863  | -0.894694 | 3.330514  |
| C  | 1.979640  | 0.918494  | 2.801059  |
| C  | 4.553375  | -0.035079 | 3.231385  |
| H  | 3.639014  | -1.941259 | 3.559815  |
| C  | 3.067357  | 1.778540  | 2.681512  |
| H  | 0.985843  | 1.315424  | 2.627435  |
| C  | 4.356504  | 1.302071  | 2.899273  |
| H  | 5.556487  | -0.413592 | 3.389178  |
| H  | 2.905991  | 2.817837  | 2.418811  |
| H  | 5.206530  | 1.968028  | 2.802396  |
| H  | 0.224905  | -1.655355 | 4.665659  |
| C  | -2.831607 | -0.135082 | 2.072694  |
| C  | -1.590123 | 0.022050  | 2.615120  |
| C  | -0.751996 | -1.094520 | 2.208630  |
| C  | -1.618615 | -1.946142 | 1.468753  |
| H  | -1.266771 | 0.881913  | 3.182114  |
| C  | -3.998303 | 0.752567  | 2.049704  |
| C  | -4.272467 | 1.574984  | 3.145878  |
| C  | -4.831880 | 0.805744  | 0.928220  |
| C  | -5.361198 | 2.435596  | 3.119482  |
| H  | -3.637567 | 1.524260  | 4.022849  |
| C  | -5.926943 | 1.660867  | 0.911153  |
| H  | -4.603313 | 0.208778  | 0.051755  |
| C  | -6.193868 | 2.477639  | 2.004721  |
| H  | -5.565717 | 3.068806  | 3.974157  |
| H  | -6.563738 | 1.698652  | 0.035788  |
| H  | -7.045136 | 3.147051  | 1.987585  |
| C  | -1.422858 | -3.258391 | 0.838610  |
| C  | -0.157733 | -3.680076 | 0.424342  |
| C  | -2.527909 | -4.082816 | 0.581076  |
| C  | -0.001525 | -4.885335 | -0.249593 |
| H  | 0.700927  | -3.047394 | 0.588779  |
| C  | -2.369861 | -5.279379 | -0.102774 |
| H  | -3.515045 | -3.804471 | 0.932706  |

|   |           |           |           |
|---|-----------|-----------|-----------|
| C | -1.106402 | -5.682128 | -0.527092 |
| H | 0.984987  | -5.186146 | -0.581137 |
| H | -3.234784 | -5.898923 | -0.304202 |
| H | -0.986032 | -6.610373 | -1.071511 |
| N | -2.824139 | -1.343093 | 1.399987  |
| H | -3.599842 | -1.684857 | 0.846806  |

#### CH-d-TS

| Symbol | X         | Y         | Z         |
|--------|-----------|-----------|-----------|
| F      | 3.738085  | -2.066621 | -2.944882 |
| F      | -4.138271 | -3.329535 | -2.400909 |
| F      | 1.761596  | -0.292321 | -2.912950 |
| C      | 2.750643  | -2.201142 | -2.063779 |
| C      | -4.743226 | -1.250894 | -1.492621 |
| C      | -3.777020 | -2.161864 | -1.871872 |
| C      | 1.708432  | -1.287491 | -2.020841 |
| C      | 2.764045  | -3.260447 | -1.174583 |
| F      | -5.295051 | 0.831120  | -0.552608 |
| C      | -4.364933 | -0.044497 | -0.924915 |
| F      | -1.557551 | -2.772865 | -2.106617 |
| C      | -2.434962 | -1.852467 | -1.691753 |
| C      | -3.023528 | 0.209599  | -0.733643 |
| C      | -2.008026 | -0.657598 | -1.129813 |
| C      | 0.663602  | -1.365423 | -1.106313 |
| C      | 1.736523  | -3.388966 | -0.257586 |
| F      | -2.705596 | 1.374407  | -0.145960 |
| C      | 0.715922  | -2.456628 | -0.251768 |
| B      | -0.473810 | -0.241279 | -0.929219 |
| F      | 1.767057  | -4.377573 | 0.640086  |
| F      | -0.247923 | -2.620087 | 0.671598  |
| C      | -0.038174 | 1.241709  | -1.388813 |
| F      | -1.951207 | 1.749944  | -2.704071 |
| F      | 1.981028  | 0.964989  | -0.213236 |
| C      | -0.775780 | 2.112498  | -2.180213 |
| C      | 1.191483  | 1.737992  | -0.972786 |
| C      | -0.350024 | 3.399157  | -2.485582 |
| C      | 1.666154  | 2.998928  | -1.269085 |
| F      | -1.110352 | 4.203998  | -3.225344 |
| F      | 2.855593  | 3.407328  | -0.828331 |
| C      | 0.872856  | 3.847708  | -2.022396 |
| F      | 3.760946  | -4.137587 | -1.185321 |
| F      | 1.280091  | 5.083657  | -2.286592 |
| F      | -6.032064 | -1.541410 | -1.633789 |
| H      | -0.238864 | -0.073204 | 1.343509  |

|    |           |           |           |
|----|-----------|-----------|-----------|
| Si | -1.554836 | 0.415807  | 3.648696  |
| H  | -0.513648 | -0.131684 | 0.463922  |
| H  | -1.763220 | 1.865962  | 3.827842  |
| C  | -2.996078 | -0.335022 | 2.717179  |
| C  | -4.234073 | 0.319003  | 2.723784  |
| C  | -2.927468 | -1.617986 | 2.154780  |
| C  | -5.373060 | -0.298524 | 2.214714  |
| H  | -4.316501 | 1.319676  | 3.136155  |
| C  | -4.062921 | -2.237624 | 1.646317  |
| H  | -1.983572 | -2.148539 | 2.107895  |
| C  | -5.290760 | -1.581987 | 1.686513  |
| H  | -6.321356 | 0.224845  | 2.223897  |
| H  | -3.989730 | -3.230755 | 1.217714  |
| H  | -6.177105 | -2.063265 | 1.288929  |
| H  | -1.441368 | -0.240668 | 4.973462  |
| C  | 3.968647  | -0.858701 | 1.394171  |
| C  | 4.551520  | -2.120603 | 1.224340  |
| C  | 4.553168  | 0.247115  | 0.771122  |
| C  | 5.668710  | -2.276480 | 0.417228  |
| H  | 4.134813  | -2.989438 | 1.721098  |
| C  | 5.674640  | 0.085573  | -0.034001 |
| H  | 4.110779  | 1.226485  | 0.890771  |
| C  | 6.229955  | -1.174335 | -0.222334 |
| H  | 6.097782  | -3.261611 | 0.283327  |
| H  | 6.107689  | 0.949394  | -0.523463 |
| H  | 7.097025  | -1.298906 | -0.859255 |
| C  | 0.834473  | 2.347850  | 2.131296  |
| C  | -0.399530 | 2.727180  | 1.588359  |
| C  | 1.867710  | 3.286425  | 2.213292  |
| C  | -0.597029 | 4.026818  | 1.144582  |
| H  | -1.192521 | 2.004306  | 1.443003  |
| C  | 1.657851  | 4.590491  | 1.785379  |
| H  | 2.830361  | 2.987771  | 2.608261  |
| C  | 0.428778  | 4.962629  | 1.248883  |
| H  | -1.547174 | 4.299867  | 0.701472  |
| H  | 2.461961  | 5.312333  | 1.852740  |
| H  | 0.276291  | 5.975522  | 0.895763  |
| C  | 1.083269  | 0.947737  | 2.520392  |
| C  | 0.124966  | 0.016858  | 2.856389  |
| C  | 1.912708  | -1.685632 | 2.586133  |
| C  | 2.725338  | -0.717839 | 2.173875  |
| H  | 2.145437  | -2.720457 | 2.378610  |
| O  | 2.377829  | 0.616696  | 2.397415  |
| C  | 0.652862  | -1.343468 | 3.315437  |

|   |           |           |          |
|---|-----------|-----------|----------|
| H | -0.093042 | -2.123046 | 3.154353 |
| H | 0.826707  | -1.307976 | 4.398559 |

### CH-e-TS

| Symbol | X         | Y         | Z         |
|--------|-----------|-----------|-----------|
| F      | -1.471550 | 4.541636  | -2.239331 |
| F      | 4.207962  | 1.391556  | -2.304302 |
| F      | -0.654108 | 1.975579  | -2.358410 |
| C      | -1.280988 | 3.847395  | -1.120974 |
| C      | 3.731376  | -0.868671 | -1.898058 |
| C      | 3.364559  | 0.462434  | -1.859772 |
| C      | -0.860233 | 2.531167  | -1.158421 |
| C      | -1.509232 | 4.445795  | 0.109143  |
| F      | 3.249818  | -3.103204 | -1.328057 |
| C      | 2.878716  | -1.824877 | -1.370837 |
| F      | 1.894639  | 2.140465  | -1.265378 |
| C      | 2.144625  | 0.828443  | -1.306746 |
| C      | 1.675608  | -1.414286 | -0.837624 |
| C      | 1.242789  | -0.095634 | -0.799063 |
| C      | -0.636305 | 1.770995  | -0.018416 |
| C      | -1.316947 | 3.720080  | 1.270524  |
| F      | 0.901465  | -2.367663 | -0.277197 |
| C      | -0.893232 | 2.401997  | 1.185722  |
| B      | -0.212573 | 0.225725  | -0.198879 |
| F      | -1.545012 | 4.286790  | 2.454276  |
| F      | -0.749609 | 1.744174  | 2.350650  |
| C      | -1.443253 | -0.630188 | -0.786579 |
| F      | -0.409922 | -1.291937 | -2.814247 |
| F      | -2.660711 | -0.083454 | 1.152566  |
| C      | -1.470669 | -1.302947 | -2.001225 |
| C      | -2.613747 | -0.696588 | -0.043396 |
| C      | -2.578746 | -2.014726 | -2.435119 |
| C      | -3.735671 | -1.406062 | -0.428823 |
| F      | -2.564161 | -2.645470 | -3.606452 |
| F      | -4.809683 | -1.465084 | 0.351250  |
| C      | -3.714721 | -2.069484 | -1.643320 |
| F      | -1.915208 | 5.709093  | 0.170745  |
| F      | -4.775416 | -2.756561 | -2.048619 |
| F      | 4.918552  | -1.223403 | -2.376893 |
| H      | -0.260725 | -0.947742 | 1.452046  |
| Si     | 1.434085  | -2.342408 | 2.889915  |
| H      | -0.101831 | -0.109043 | 1.087166  |
| H      | 1.872598  | -3.572838 | 2.204892  |
| C      | 2.485306  | -0.892673 | 2.368654  |

|   |           |           |          |
|---|-----------|-----------|----------|
| C | 3.694739  | -1.081803 | 1.690350 |
| C | 2.064238  | 0.416683  | 2.630364 |
| C | 4.452656  | 0.008285  | 1.272516 |
| H | 4.044256  | -2.086458 | 1.470091 |
| C | 2.806895  | 1.508474  | 2.196423 |
| H | 1.131926  | 0.597273  | 3.156326 |
| C | 4.003424  | 1.302734  | 1.515059 |
| H | 5.384621  | -0.151757 | 0.742003 |
| H | 2.452799  | 2.514909  | 2.386917 |
| H | 4.581542  | 2.150354  | 1.165824 |
| H | 1.429335  | -2.518620 | 4.359479 |
| C | -2.523927 | -2.071187 | 3.126621 |
| C | -0.400511 | -2.055073 | 2.454761 |
| C | -1.222171 | -2.895931 | 1.672827 |
| H | -1.109267 | -0.934703 | 4.160682 |
| N | -2.502920 | -2.888727 | 2.080838 |
| N | -1.318539 | -1.569910 | 3.403608 |
| H | -3.407474 | -1.813815 | 3.691182 |
| H | -0.902857 | -3.470771 | 0.814900 |

#### CH-f-TS

| Symbol | X         | Y         | Z         |
|--------|-----------|-----------|-----------|
| F      | -1.453719 | 4.832370  | -1.761872 |
| F      | 4.431937  | 1.914247  | -1.894494 |
| F      | -0.496258 | 2.352223  | -2.197754 |
| C      | -1.287880 | 3.990739  | -0.744714 |
| C      | 4.088057  | -0.389594 | -1.606747 |
| C      | 3.622593  | 0.910609  | -1.558610 |
| C      | -0.794135 | 2.714386  | -0.944431 |
| C      | -1.618232 | 4.392522  | 0.540859  |
| F      | 3.722779  | -2.674164 | -1.181263 |
| C      | 3.255141  | -1.426546 | -1.221836 |
| F      | 1.968576  | 2.449955  | -1.070506 |
| C      | 2.327460  | 1.162044  | -1.125781 |
| C      | 1.973570  | -1.132311 | -0.805286 |
| C      | 1.450861  | 0.153408  | -0.753467 |
| C      | -0.594235 | 1.807051  | 0.086837  |
| C      | -1.455652 | 3.513959  | 1.596786  |
| F      | 1.208682  | -2.162785 | -0.396715 |
| C      | -0.955265 | 2.245085  | 1.347549  |
| B      | -0.069627 | 0.319817  | -0.251821 |
| F      | -1.786262 | 3.888678  | 2.831609  |
| F      | -0.851423 | 1.422610  | 2.412573  |
| C      | -1.180388 | -0.478476 | -1.114926 |

|    |           |           |           |
|----|-----------|-----------|-----------|
| F  | 0.156414  | -0.898773 | -3.028101 |
| F  | -2.708362 | -0.166676 | 0.655198  |
| C  | -1.009411 | -1.012046 | -2.386244 |
| C  | -2.449925 | -0.637899 | -0.580100 |
| C  | -2.018128 | -1.682159 | -3.063870 |
| C  | -3.479394 | -1.310285 | -1.211399 |
| F  | -1.804734 | -2.178086 | -4.279582 |
| F  | -4.654452 | -1.486032 | -0.601774 |
| C  | -3.259064 | -1.840369 | -2.470551 |
| F  | -2.096280 | 5.613771  | 0.755547  |
| F  | -4.226310 | -2.497274 | -3.100267 |
| F  | 5.344276  | -0.641728 | -1.963028 |
| H  | -0.391088 | -1.066438 | 1.469831  |
| Si | 0.795334  | -2.551660 | 2.856222  |
| H  | -0.003157 | -0.256233 | 0.897973  |
| H  | 1.004320  | -3.864521 | 2.227540  |
| C  | 2.174332  | -1.367950 | 2.488258  |
| C  | 3.375178  | -1.868185 | 1.971466  |
| C  | 2.059928  | 0.008264  | 2.724588  |
| C  | 4.434958  | -1.011467 | 1.690454  |
| H  | 3.481858  | -2.928106 | 1.763127  |
| C  | 3.108675  | 0.866751  | 2.420245  |
| H  | 1.141470  | 0.424794  | 3.125689  |
| C  | 4.296368  | 0.355952  | 1.901648  |
| H  | 5.356758  | -1.409078 | 1.281067  |
| H  | 2.999893  | 1.932423  | 2.582764  |
| H  | 5.112398  | 1.026442  | 1.657871  |
| H  | 0.521283  | -2.658286 | 4.303499  |
| C  | -0.985458 | -1.980504 | 2.171146  |
| C  | -1.841122 | -1.357971 | 3.109462  |
| N  | -3.138834 | -1.628149 | 3.210375  |
| C  | -3.607226 | -2.507496 | 2.335381  |
| C  | -2.792154 | -3.137374 | 1.370929  |
| N  | -1.505272 | -2.896212 | 1.287688  |
| H  | -1.445786 | -0.613940 | 3.795270  |
| H  | -4.665797 | -2.740124 | 2.387242  |
| H  | -3.220420 | -3.848117 | 0.671665  |

#### NH-a-TS

| Symbol | X         | Y         | Z         |
|--------|-----------|-----------|-----------|
| H      | -0.034315 | -0.127487 | -1.678299 |
| F      | -1.968696 | -4.197119 | 1.856832  |
| F      | 4.107072  | -2.512532 | -0.122946 |
| F      | -0.206215 | -2.199967 | 1.737918  |

C -2.037570 -3.317654 0.861120  
 C 3.874285 -0.678141 1.330805  
 C 3.357753 -1.528575 0.367784  
 C -1.128492 -2.273893 0.774331  
 C -3.028950 -3.443120 -0.096727  
 F 3.601134 1.192022 2.723146  
 C 3.102434 0.369331 1.803742  
 F 1.619337 -2.136085 -1.051969  
 C 2.075869 -1.309180 -0.098742  
 C 1.829236 0.566950 1.293551  
 C 1.273871 -0.257818 0.324906  
 C -1.166766 -1.333809 -0.245805  
 C -3.106630 -2.522981 -1.129297  
 F 1.163871 1.627770 1.761981  
 C -2.184137 -1.493390 -1.176846  
 B -0.168103 -0.068910 -0.363290  
 F -4.057972 -2.637512 -2.052511  
 F -2.289802 -0.617164 -2.188989  
 C -0.952076 1.313861 -0.093705  
 F -1.476628 0.545999 2.064924  
 F -0.525025 2.268782 -2.220693  
 C -1.590413 1.492276 1.127053  
 C -1.107297 2.342588 -1.003832  
 C -2.331748 2.617444 1.435704  
 C -1.840786 3.489427 -0.740490  
 F -2.919431 2.748903 2.620388  
 F -1.953443 4.451157 -1.653035  
 C -2.457670 3.624415 0.489721  
 F -3.903315 -4.439564 -0.025321  
 F -3.164159 4.713421 0.766335  
 F 5.106851 -0.859356 1.789031  
 H 0.765611 0.290125 -1.892993  
 C 2.477352 1.833385 -1.775345  
 C 3.737397 1.406238 -1.558071  
 C 3.936688 0.193502 -2.325411  
 C 2.791797 -0.075948 -2.983474  
 N 1.820418 0.895044 -2.617760  
 H 1.255060 1.290505 -3.368754  
 H 1.933832 2.688365 -1.405727  
 H 4.462394 1.879639 -0.914319  
 H 4.834649 -0.404466 -2.351289  
 H 2.521235 -0.880325 -3.647576

**NH-b-TS**

| Symbol | X         | Y         | Z         |
|--------|-----------|-----------|-----------|
| H      | -0.098231 | -0.112987 | -1.678452 |
| F      | -2.801993 | -3.736784 | 1.897736  |
| F      | 3.527586  | -2.835408 | 0.818503  |
| F      | -0.835223 | -1.938442 | 1.894630  |
| C      | -2.662966 | -2.917016 | 0.860472  |
| C      | 3.473803  | -0.716869 | 1.845194  |
| C      | 2.894772  | -1.685912 | 1.039542  |
| C      | -1.643889 | -1.978773 | 0.831977  |
| C      | -3.547485 | -2.997662 | -0.201725 |
| F      | 3.372523  | 1.414453  | 2.820099  |
| C      | 2.822114  | 0.485785  | 2.044129  |
| F      | 1.158371  | -2.368752 | -0.345400 |
| C      | 1.673217  | -1.422403 | 0.456437  |
| C      | 1.603720  | 0.720569  | 1.419308  |
| C      | 0.995306  | -0.216804 | 0.597532  |
| C      | -1.464103 | -1.100917 | -0.228145 |
| C      | -3.406425 | -2.139515 | -1.279534 |
| F      | 1.047062  | 1.913954  | 1.642438  |
| C      | -2.379766 | -1.212099 | -1.265619 |
| B      | -0.333611 | 0.041448  | -0.257514 |
| F      | -4.250468 | -2.212663 | -2.303838 |
| F      | -2.272336 | -0.395868 | -2.324974 |
| C      | -0.902974 | 1.540299  | -0.295237 |
| F      | -2.657945 | 1.029279  | 1.204617  |
| F      | 0.820432  | 2.264095  | -1.728909 |
| C      | -2.018173 | 1.918833  | 0.437978  |
| C      | -0.284810 | 2.547160  | -1.020363 |
| C      | -2.505881 | 3.216315  | 0.440903  |
| C      | -0.740675 | 3.852072  | -1.048960 |
| F      | -3.575778 | 3.538344  | 1.160671  |
| F      | -0.115295 | 4.781279  | -1.764972 |
| C      | -1.864410 | 4.186026  | -0.310403 |
| F      | -4.525396 | -3.893460 | -0.187661 |
| F      | -2.318714 | 5.432122  | -0.318072 |
| F      | 4.650171  | -0.942029 | 2.412947  |
| H      | 0.717745  | -0.095373 | -1.641157 |
| C      | 4.313563  | -1.372531 | -1.988121 |
| C      | 4.597912  | -0.075023 | -1.616136 |
| C      | 3.366112  | 0.597035  | -1.702285 |
| N      | 2.996269  | -1.412856 | -2.266329 |
| H      | 5.553749  | 0.327418  | -1.328082 |
| N      | 2.400686  | -0.224613 | -2.099639 |
| H      | 2.447213  | -2.213170 | -2.542085 |

H 3.135236 1.629592 -1.493018  
H 4.933285 -2.249783 -2.073736

**NH-c-TS**

| Symbol | X         | Y         | Z         |
|--------|-----------|-----------|-----------|
| H      | 0.114297  | 0.288040  | -1.420185 |
| F      | -1.311097 | 5.161936  | 0.296989  |
| F      | -4.239899 | -1.656489 | -2.741452 |
| F      | -2.199357 | 2.678822  | 0.093627  |
| C      | -0.435984 | 4.166198  | 0.210916  |
| C      | -4.654247 | -0.871016 | -0.566698 |
| C      | -3.791428 | -1.093941 | -1.623389 |
| C      | -0.878165 | 2.852420  | 0.114147  |
| C      | 0.918986  | 4.440599  | 0.199469  |
| F      | -5.007593 | -0.091923 | 1.624613  |
| C      | -4.180965 | -0.300275 | 0.605955  |
| F      | -1.647985 | -1.004024 | -2.534595 |
| C      | -2.459165 | -0.733881 | -1.495665 |
| C      | -2.843319 | 0.040907  | 0.690392  |
| C      | -1.947380 | -0.147941 | -0.350731 |
| C      | -0.001410 | 1.777751  | 0.031515  |
| C      | 1.827863  | 3.397895  | 0.100013  |
| F      | -2.402647 | 0.583844  | 1.831628  |
| C      | 1.351054  | 2.107522  | 0.023755  |
| B      | -0.407747 | 0.223095  | -0.101359 |
| F      | 3.131886  | 3.651173  | 0.082801  |
| F      | 2.256672  | 1.118456  | -0.050661 |
| C      | 0.299572  | -0.806738 | 0.914844  |
| F      | -0.468123 | -2.632228 | -0.375878 |
| F      | 1.103436  | 0.838828  | 2.427875  |
| C      | 0.194422  | -2.175103 | 0.696616  |
| C      | 0.988156  | -0.439679 | 2.067944  |
| C      | 0.783339  | -3.126073 | 1.509816  |
| C      | 1.570552  | -1.364476 | 2.921383  |
| F      | 0.707020  | -4.417546 | 1.200423  |
| F      | 2.215010  | -0.965684 | 4.010593  |
| C      | 1.480598  | -2.715907 | 2.634574  |
| F      | 1.347789  | 5.691179  | 0.278495  |
| F      | 2.045109  | -3.607778 | 3.430354  |
| F      | -5.933563 | -1.208495 | -0.668754 |
| H      | 0.286973  | -0.513123 | -1.351024 |
| C      | 1.876011  | -0.938905 | -3.445901 |
| C      | 2.940527  | 0.061688  | -3.013445 |
| C      | 3.478560  | -1.753572 | -1.047096 |

|   |          |           |           |
|---|----------|-----------|-----------|
| C | 2.408255 | -2.592613 | -1.726878 |
| H | 3.308478 | 0.618825  | -3.874947 |
| H | 2.286670 | -1.599973 | -4.219399 |
| H | 1.028340 | -0.398000 | -3.875762 |
| H | 4.219038 | -2.380162 | -0.548960 |
| H | 3.017761 | -1.092347 | -0.310519 |
| H | 2.867744 | -3.224336 | -2.500187 |
| H | 1.935373 | -3.256609 | -1.001993 |
| H | 2.535091 | 0.766917  | -2.289071 |
| H | 0.596599 | -2.281057 | -2.603051 |
| N | 1.382441 | -1.714379 | -2.297978 |
| S | 4.390023 | -0.750799 | -2.267249 |

**NH-d-TS**

| Symbol | X         | Y         | Z         |
|--------|-----------|-----------|-----------|
| H      | 0.191539  | -0.258198 | 1.387094  |
| F      | 0.940446  | 3.267836  | -3.528234 |
| F      | 4.579104  | -1.303573 | -1.057896 |
| F      | 1.036049  | 0.769180  | -2.598286 |
| C      | 0.413168  | 2.987345  | -2.341627 |
| C      | 2.983283  | -3.015847 | -1.295567 |
| C      | 3.314368  | -1.704790 | -0.989460 |
| C      | 0.454903  | 1.697133  | -1.836296 |
| C      | -0.187690 | 3.991772  | -1.601926 |
| F      | 1.344119  | -4.680733 | -1.506426 |
| C      | 1.665376  | -3.426079 | -1.211214 |
| F      | 2.672413  | 0.423542  | -0.324475 |
| C      | 2.311685  | -0.833926 | -0.610763 |
| C      | 0.688097  | -2.523564 | -0.814787 |
| C      | 0.974192  | -1.199658 | -0.500769 |
| C      | -0.084203 | 1.361334  | -0.602719 |
| C      | -0.747559 | 3.697214  | -0.369196 |
| F      | -0.558641 | -2.996881 | -0.754568 |
| C      | -0.695614 | 2.395126  | 0.094206  |
| B      | -0.124621 | -0.135704 | -0.021350 |
| F      | -1.326982 | 4.656006  | 0.346810  |
| F      | -1.260201 | 2.139868  | 1.284293  |
| C      | -1.636830 | -0.656525 | 0.153154  |
| F      | -1.992959 | -0.212880 | -2.130187 |
| F      | -1.437355 | -1.241509 | 2.433832  |
| C      | -2.471747 | -0.638786 | -0.954823 |
| C      | -2.184254 | -1.164464 | 1.318504  |
| C      | -3.782384 | -1.079334 | -0.915425 |
| C      | -3.493380 | -1.608883 | 1.404464  |



|   |           |           |           |
|---|-----------|-----------|-----------|
| F | -4.547367 | -1.049207 | -2.001081 |
| F | -3.979964 | -2.077029 | 2.548946  |
| C | -4.295885 | -1.563732 | 0.277586  |
| F | -0.231626 | 5.230187  | -2.072538 |
| F | -5.551400 | -1.986575 | 0.337896  |
| F | 3.925869  | -3.870343 | -1.663606 |
| H | 0.398771  | 0.509428  | 1.363727  |
| C | 0.892336  | 1.694904  | 3.713465  |
| C | 1.211896  | 0.276410  | 4.198612  |
| C | 3.168735  | 0.221983  | 2.905537  |
| C | 2.920412  | 1.651348  | 2.419946  |
| H | 0.836912  | 0.169156  | 5.217919  |
| H | 1.306845  | 2.417066  | 4.430997  |
| H | -0.187358 | 1.837875  | 3.653812  |
| H | 4.245608  | 0.047163  | 2.940587  |
| H | 2.772523  | -0.468938 | 2.148564  |
| H | 3.410499  | 2.349366  | 3.114134  |
| H | 3.333352  | 1.798579  | 1.424984  |
| H | 0.643454  | -0.442112 | 3.595979  |
| H | 1.287749  | 2.824174  | 2.052035  |
| N | 1.470876  | 1.879069  | 2.374598  |
| O | 2.633763  | -0.027929 | 4.209877  |

**NH-e-TS**

| Symbol | X         | Y         | Z         |
|--------|-----------|-----------|-----------|
| H      | -0.166796 | -0.081686 | -1.679505 |
| F      | -2.769499 | -3.889768 | 1.798851  |
| F      | 3.423624  | -2.926642 | 0.719759  |
| F      | -0.807374 | -2.094230 | 1.863360  |
| C      | -2.681086 | -2.980640 | 0.833128  |
| C      | 3.497857  | -0.800494 | 1.719722  |
| C      | 2.841114  | -1.756551 | 0.961112  |
| C      | -1.665507 | -2.037459 | 0.841427  |
| C      | -3.611918 | -2.972754 | -0.190812 |
| F      | 3.519195  | 1.332715  | 2.700350  |
| C      | 2.893245  | 0.419594  | 1.962189  |
| F      | 1.014509  | -2.387307 | -0.316786 |
| C      | 1.594378  | -1.458148 | 0.448426  |
| C      | 1.642208  | 0.683093  | 1.422689  |
| C      | 0.957552  | -0.234563 | 0.636917  |
| C      | -1.535989 | -1.067211 | -0.143397 |
| C      | -3.520943 | -2.022472 | -1.195218 |
| F      | 1.127918  | 1.886108  | 1.691707  |
| C      | -2.498517 | -1.093815 | -1.145426 |

|   |           |           |           |
|---|-----------|-----------|-----------|
| B | -0.409482 | 0.068368  | -0.127144 |
| F | -4.411367 | -2.010233 | -2.181511 |
| F | -2.445708 | -0.183750 | -2.127862 |
| C | -0.927142 | 1.579724  | -0.201470 |
| F | -3.021294 | 1.117777  | 0.810235  |
| F | 1.103546  | 2.267011  | -1.172263 |
| C | -2.171735 | 1.988852  | 0.258423  |
| C | -0.123091 | 2.580900  | -0.731188 |
| C | -2.597526 | 3.307611  | 0.190218  |
| C | -0.510705 | 3.902865  | -0.823471 |
| F | -3.795903 | 3.655934  | 0.647139  |
| F | 0.298628  | 4.821441  | -1.341104 |
| C | -1.764327 | 4.266763  | -0.356265 |
| F | -4.586627 | -3.870874 | -0.211972 |
| F | -2.158851 | 5.530053  | -0.428384 |
| F | 4.705494  | -1.054253 | 2.206945  |
| H | 0.623686  | -0.066653 | -1.651089 |
| C | 3.442223  | 0.449198  | -1.588063 |
| C | 3.024662  | -1.501010 | -2.382727 |
| C | 4.347072  | -1.507770 | -2.042573 |
| N | 4.597138  | -0.255320 | -1.536851 |
| H | 3.360060  | 1.468765  | -1.246797 |
| H | 2.439516  | -2.302766 | -2.802110 |
| H | 5.107843  | -2.265966 | -2.105639 |
| N | 2.470208  | -0.275542 | -2.094125 |
| H | 5.485109  | 0.085230  | -1.201205 |

**NH-f-TS**

| Symbol | X         | Y         | Z         |
|--------|-----------|-----------|-----------|
| H      | -0.125609 | -0.172012 | 1.612634  |
| F      | -3.612697 | -2.706350 | -2.212884 |
| F      | -3.683550 | 2.877140  | 2.403568  |
| F      | -2.085559 | -0.505250 | -1.918639 |
| C      | -2.801652 | -2.592122 | -1.167396 |
| C      | -2.856618 | 3.632725  | 0.335340  |
| C      | -2.877437 | 2.702081  | 1.361780  |
| C      | -2.021473 | -1.464920 | -0.989845 |
| C      | -2.725078 | -3.619501 | -0.238367 |
| F      | -2.003996 | 4.333986  | -1.735664 |
| C      | -2.016256 | 3.444219  | -0.748927 |
| F      | -2.095354 | 0.706177  | 2.279127  |
| C      | -2.051049 | 1.596768  | 1.275022  |
| C      | -1.197499 | 2.326457  | -0.793833 |
| C      | -1.183974 | 1.373201  | 0.214387  |

|   |           |           |           |
|---|-----------|-----------|-----------|
| C | -1.152277 | -1.312252 | 0.081567  |
| C | -1.870482 | -3.507977 | 0.844047  |
| F | -0.419300 | 2.190532  | -1.870077 |
| C | -1.103443 | -2.361920 | 0.982442  |
| B | -0.290012 | 0.041757  | 0.173802  |
| F | -1.795538 | -4.489000 | 1.737361  |
| F | -0.297562 | -2.288335 | 2.055659  |
| C | 1.071909  | 0.110891  | -0.659190 |
| F | 1.721554  | 1.970841  | 0.620331  |
| F | 0.581873  | -1.710477 | -2.099707 |
| C | 1.995391  | 1.106506  | -0.365526 |
| C | 1.401309  | -0.731296 | -1.712164 |
| C | 3.195713  | 1.252018  | -1.032424 |
| C | 2.586499  | -0.601629 | -2.423390 |
| F | 4.064233  | 2.196017  | -0.683456 |
| F | 2.865262  | -1.426082 | -3.426961 |
| C | 3.490549  | 0.386427  | -2.075129 |
| F | -3.466913 | -4.707932 | -0.390712 |
| F | 4.632730  | 0.507723  | -2.735086 |
| F | -3.642437 | 4.699117  | 0.390399  |
| H | 1.844313  | -0.382165 | 3.441093  |
| C | 3.429783  | 0.649203  | 2.721578  |
| C | 2.926137  | -1.751640 | 2.408182  |
| H | 3.919377  | 0.773223  | 1.752499  |
| H | 2.913570  | 1.589309  | 2.924693  |
| H | 2.073104  | -2.429009 | 2.358709  |
| H | 0.600506  | 0.129233  | 1.533946  |
| N | 2.394417  | -0.389056 | 2.584334  |
| C | 3.761667  | -1.871514 | 1.140596  |
| H | 3.982532  | -2.918919 | 0.930956  |
| H | 3.218720  | -1.458233 | 0.289618  |
| H | 4.713092  | -1.342146 | 1.230247  |
| C | 4.481383  | 0.392106  | 3.799569  |
| H | 4.009661  | 0.210582  | 4.769267  |
| H | 5.110612  | -0.467597 | 3.560430  |
| H | 5.132918  | 1.262238  | 3.898284  |
| H | 3.533017  | -2.059824 | 3.269045  |
